# Supplementary material for: Single-cell RNA-seq analysis of mouse preimplantation embryos by third-generation sequencing
Source: PLoS Biol. 2020 Dec 30;18(12):e3001017. doi: 10.1371/journal.pbio.3001017 (PMC7773192; doi:10.1371/journal.pbio.3001017)
Supplement: S4 Table — lncRNA, long noncoding RNA. (XLS) [file pbio.3001017.s010.xls]

novel transcript id	lncRNA_name	Oocyte_1	Oocyte_2	Oocyte_3	Oocyte_5	Oocyte_8	Oocyte_9	Oocyte_10	Zygote_1	Zygote_2	Zygote_3	Zygote_4	Zygote_5	Zygote_6	Zygote_7	Zygote_8	Zygote_10	2-cell_early_1_1	2-cell_early_2_1	2-cell_early_2_2	2-cell_early_3_1	2-cell_early_3_2	2-cell_early_4_1	2-cell_early_4_2	2-cell_early_5_2	2-cell_early_7_1	2-cell_early_8_2	2-cell_early_9_1	2-cell_early_9_2	2-cell_early_11_1	2-cell_late_1_2	2-cell_late_2_1	2-cell_late_2_2	2-cell_late_3_1	2-cell_late_3_2	2-cell_late_4_1	2-cell_late_4_2	2-cell_late_5_1	2-cell_late_5_2	2-cell_late_6_1	2-cell_late_6_2	2-cell_late_7_2	2-cell_late_8_1	2-cell_late_8_2	2-cell_late_9_1	2-cell_late_9_2	2-cell_late_10_1	2-cell_late_10_2	4-cell_1_1
TCONS_00084073	NONMMUT080519.1	0.384001387	0.662207757	0.422241735	0.842786601	0.507479463	0.436351339	0.35658627	0.253494765	0.34045203	0.05328101	0.447620058	0.62731889	0.190012931	0.288062909	0.163668861	0	0	0.16697174	0	0	0.013272985	0	0	0.053611925	0	0	0	0	0	0.018962738	0	0	0.446566462	0.051050058	0	0.666657783	0.102630415	0	0.0351704	0.119185628	0	0	0	0.247957429	0	0	0.247837625	0
TCONS_00208114	NONMMUT101299.1	0	16.24892284	0	5.147451602	1.635137866	0	4.554815151	7.876961679	16.05493954	3.937184826	34.21943435	11.62395062	5.950833041	10.60100758	0	4.175985769	0	0	0	0.070400756	0	0	0	0	0	0	0	0	0	0	0	0	0	0	0	0	0	0	0	0	0	0	0	0	0	0	0	0
TCONS_00267286	NONMMUT143827.1	10.54736611	14.40301871	14.47751038	11.66943999	6.302270336	18.81510157	8.304901685	8.912789918	19.70862209	6.790404191	16.51102535	14.56779008	7.983324961	15.14393587	23.08657368	17.23139493	14.03159069	13.0111267	12.49177069	17.68980701	6.196791907	38.1593836	18.75918354	16.13357956	54.51965006	57.80130983	27.53390773	22.0353693	7.873122501	8.22279318	13.20050737	100.0598935	18.83225104	29.77897062	7.574628612	18.46698059	1.641162974	11.68183544	2.094678667	2.807782972	5.010192603	3.696273435	1.397308144	9.319479968	3.515527854	1.813268326	18.04718178	2.879631684
TCONS_00204332	NONMMUT139470.1	0	0	0	0	0	0	0	0	0.064734522	0	0	0	0	0	0	0	0	6.978656903	6.502296524	7.056555983	8.031908241	4.666922146	17.26608627	13.25206964	4.841735319	4.285655798	0	2.625437468	1.476193774	4.503802012	10.96457505	1.087719358	8.131119362	11.28252221	2.39820417	0.935880862	1.769861515	3.865157173	3.79217801	10.76901742	0.867591265	0	2.646035066	5.321662341	2.007150064	3.51588359	5.209192817	1.702182284
TCONS_00479637	NONMMUT011099.2	0	0	0	0	0	0	0.028158999	0	0	0	0	0	0	0	0	0	0	0.082045739	0	0.305299534	0.560040349	3.898459583	0	0	0.302065635	0	0	0	1.297896598	0	0	0	0.970701519	0	0.224169111	0	0	0	0	0.569460985	0	0	0	1.783929723	0	0.153057324	0	0
TCONS_00315799	NONMMUT029615.2	0.384001387	1.489967453	0.085862366	0.132931527	0.415508569	0.086656649	0.064613629	0.450358729	1.416085899	0.492477122	1.289425528	0.843272884	0.816933734	1.505574447	0	0.689294986	2.67701816	0.253421358	0.143625795	0.242279135	0.239816301	0.504578918	2.057046267	0.316828606	0.224719873	0	0	0.060128414	0	0.139148573	0.048388424	0	0.332721786	0.821684713	0.328742626	0.17610432	0.1383458	0.287528663	0.0351704	0.023837126	0	0.252978813	0.072216029	0	0.53024977	0.174816544	0.851888727	0
TCONS_00357758	NONMMUT023203.2	0	0	0	0	0	0	0	0	0	0	0	0	0	0	0	0	0	0.041419427	0	0	0	0.04707239	0	0.006582353	0	0	0	0	0	0	0.796812186	0	0.024159246	0	0.065671998	0	0	0	0	0.030789621	0.399214548	0	0	0	0	0	0	3.580981978
TCONS_00227752	NONMMUT093409.1	2.139436302	1.324415514	1.561312462	1.480896456	0.195184409	1.240874121	1.321427901	0.727252038	0.243180021	0.079761991	0.895240115	0.36217012	0.450393173	0.487533937	0.108354095	0.331840047	0	0	0.192077292	0.630947505	0.537555911	0	0.260484522	0.327628431	0.102785748	0	0	0.029989234	0	0.284441072	0.096776849	0	1.220614997	0.672159094	0.666073346	0.586658849	0.342101385	0.216839112	0.422044797	0.76278802	0	0	0.102871836	0	0.378595307	0.611704977	0	0.319959076
TCONS_00218501	NONMMUT142601.1	1.481148209	2.979934906	1.767523542	3.623982383	1.210143334	3.313542982	1.908729191	4.39513188	6.760404589	2.605797668	5.539298213	7.183040723	3.046777345	8.312993403	2.383790097	7.554101649	6.692545401	2.598810768	3.529780384	3.892184764	6.179006107	1.190645475	10.02865408	3.443750089	3.248385255	3.662779752	1.926485432	4.708909501	5.742905302	3.185796897	5.663913475	7.348213871	5.158185009	6.816756752	7.837047338	7.367875154	3.557854404	5.235115706	3.235676775	7.580317184	2.126142642	2.023830503	3.257608129	0.991829716	2.271571844	1.988783961	3.203761569	38.07513004
TCONS_00623671	NONMMUT139470.1	0	0	0	0	0	0	0	0	0	0	0	0	0	0	0	0	0	0	0	0	0	0	0	0	0	0	0	0	29.7254114	0	0	0	0	0	0	0	0	0	0	0	0	62.69877494	0	0	0	0	0	358.2828142
TCONS_00296586	NONMMUT139470.1	0	0	0	0	0	0	0	0	0	0	0	0	0	0	0	0	0	1.96157356	4.227092982	40.318961	48.67710135	1.187213596	33.44438917	13.03071196	0.340311097	0	0	0	0	1.31921873	0	0	6.874741834	21.35698735	0.563668112	0.727456973	0	0	6.051841021	20.25912538	0	0	0	0	0	0	1.231823805	0
TCONS_00238484	NONMMUT071895.2	3.894871216	3.145486846	1.563698619	9.927556604	2.264139141	1.952972234	4.215984257	4.774567726	9.046296788	5.849345631	6.728624706	10.46295394	4.344969431	4.196274247	3.142268765	8.904422009	1.33850908	0	0	1.77439646	3.022948986	0.324637172	4.119171981	0.113323696	0.136774116	0	0.192648543	0.179935403	0.133555937	0.246515596	0.580661094	0	4.10102078	3.114096064	0.481840293	0.186664179	1.163144709	0.588563304	0.386874397	2.709486611	0.375201643	0	0.171453059	0.123978714	0.907925632	1.179716742	0	0.959877228
TCONS_00099148	NONMMUT135292.1	4.352546013	14.98592709	12.4769585	24.68320889	9.037272344	15.42507438	21.89908073	19.95234937	36.90504865	23.17426165	37.06573839	20.09923445	16.9629991	32.86859782	13.45497814	19.10253034	0	0	0	0	0	0	0	0.296003352	0	0	0	0	0	0	0	0	0	0	0	0	0	0	0	0	0	0	0	0	0	0	0	0
TCONS_00026484	NONMMUT139470.1	0	0	0	0	0	0	0	0	0	0	0	0	0	0	0	0	0	0	0	0	0	0	0	0	0	0	0	0	0	0	3.301251872	4.839533655	0	0	0	0	0	0	0	0	4.296809213	8.66047668	0	12.52829706	0	0	0	0
TCONS_00026486	NONMMUT136346.1	0	0	0	0	0	0	0	0	0	0	0	0	0	0	0	0	0	64.66283249	89.79085184	0	0	27.94928175	39.67830474	24.31253144	30.25595607	0	30.27125088	40.53986619	48.45142291	20.83428455	32.51881163	13.68953874	0	0	0	41.05286629	34.41786246	9.142494552	21.98290664	0	8.015682828	0	8.562708694	12.41882385	37.81885878	25.5657726	10.12140535	0
TCONS_00361189	NONMMUT011559.2	2.810177011	3.311038785	2.851859957	9.668399724	3.008845734	2.188970129	1.540302507	3.261219474	3.209976279	1.672476021	1.32025536	5.626674992	3.115422563	5.179647611	0.488351908	1.369251045	1.33850908	1.911471602	0.644563372	6.123146139	7.377656242	2.448073453	7.191977639	0.411048586	0.632580287	1.424414348	0.577945629	1.259847715	1.202003435	3.195828185	6.487968344	15.14319914	8.675245711	4.25118505	4.894930508	11.25979663	6.916434751	9.174122086	4.376182497	4.955500043	8.479682193	4.38134006	4.651007143	3.160589369	10.2922216	6.292346943	10.36927838	53.5589096
TCONS_00118058	NONMMUT056424.2	0	0	0	0	0	0	0	0	0	0	0	0	0	0	0	0	0	0	2.327040401	4.543868426	3.175687866	0	0	6.780514604	1.441941118	0	24.94124364	0	1.889415844	9.365867036	0	0	53.48897915	1.004282261	15.4431798	0	0	0	0	0	0	0	1.548083964	15.72955144	0	0	2.998091746	0
TCONS_00812532	NONMMUT106537.1	0	0	0	0	0	0	0.024740067	0	0.215652043	0	0	0	0	0.163480576	0.325062286	0	0	1.777883775	1.311815875	0	0.021522146	0.491083287	2.567726171	0.199049164	0.674552843	0	6.171881377	1.061528911	3.412354197	1.399715554	2.142784602	7.713236395	0.136865178	0.899833843	2.287721025	4.797429406	2.759492402	4.469673641	1.638237219	0.085940784	3.841814687	4.120012946	2.711530135	1.721816387	4.248812879	3.378009658	2.472498955	0
TCONS_00622236	NONMMUT057244.2	0	0	0.044728165	0	0	0	0.023481564	0	0	0	0	0	0	0	0	0	0	0.040448904	0	0	0	0.028830873	0	0	0.077568021	0	0.385297086	0	0.127412364	0	0	1.102232081	0	0.289521894	0.677382422	0.117145106	0.129177483	0.475683058	0.230647481	0.253992519	0.621959256	0.188469216	0.522554635	0.371936143	0.207632484	0.051536144	0.088159384	0
TCONS_00169581	NONMMUT109519.1	0	0	0	0.08742105	0	0.035330822	0	0.101657187	0.073926726	0	0	0	0.04156864	0.084082192	0	0.078330053	4.433142074	0.410990501	0.713471101	0.078241815	0.252352636	0.169553357	1.085178517	0.40307828	0.673441554	1.095781609	0	0.078631771	0	1.013349764	0.158520479	0.504454882	0.300509458	0.051832825	0.759238584	0	0	0	0.186860334	0.145366738	0	0	0.240068574	0	0.476272897	0	0.244367898	0
TCONS_00523722	NONMMUT115959.1	0.510941275	0.353618942	0.093806402	0.301223971	0.124488616	0.409120288	0.829772822	0.395719967	0.375032229	0.086807634	0	0.325892747	0.787154797	1.5639044	0	0.04342364	0	0	0.063289468	0	0.042141729	0	0	0	0.168967324	0	0	0	0	0	0	0.391292389	0.092186203	0.067709393	0.555264251	0	0	0	0.112826642	0.323596926	0	0	0	0	0	0	0.292554613	0
TCONS_00045335	NONMMUT145089.1	0	0	0.821279814	0.820970468	0	0	0.046281439	0	0	0	0	0.243398442	0.509235716	0	0	0	0	0.082024867	0	0.524210581	1.192053461	0.549363389	0	0.433785999	0	0	0	0.327152552	0	0.868246892	0	0	1.964192814	0.572407281	0.496479735	1.861175199	1.290201163	2.004398798	0	0.836667218	0	0.696703651	0	0	0	0.971627817	0	13.92973833
TCONS_00045334	NONMMUT145089.1	0	0	0.02751445	4.601662999	0.390368817	0.221066497	0	0.316196538	1.190998472	0.065298484	0	0.239495052	0	1.463402761	0	0.239509505	0	1.956324386	2.014458618	4.231402921	5.821551335	2.271177113	0.411174817	1.317191386	1.778166089	0	0	4.426920735	1.050551002	4.196321213	0	0	5.966879659	3.232157831	2.867502444	6.163624534	14.99392739	7.15101317	3.263004175	3.8899408	1.503683117	0	0	2.063997639	9.355306385	2.77364514	4.743470515	45.59032881
TCONS_00457441	NONMMUT022630.2	2.344767329	0	0.243299616	0.030376437	0	0.797172989	0	0	0	0	0	0.023541058	0	0	0	0	3.770580079	0	0	0	0	0	0	0	0	12.5657764	21.64695355	0	0	0	0	8.704143035	0	0	0	1.928320971	0	1.658106736	0	0	0	0	0.55201027	9.731957151	0	0	0	0
TCONS_00520298	NONMMUT075201.1	25.60899767	29.63826703	14.64911728	20.91182313	11.83067353	14.98737308	15.83527882	12.6632603	20.03424014	15.18535377	24.06841859	16.35980784	16.80358641	17.10464066	10.19769151	14.74202571	15.57756868	0	0	0.374249763	0.487078748	0.888980248	0	2.110683617	0	0	0	0	0	0	7.43004258	14.3619003	0.570168616	0.645876822	0	2.542499454	1.325198135	4.216188719	6.491154484	1.022143892	16.00059912	18.45809312	4.911855828	4.857610012	6.101550143	3.619414658	3.188006177	0
TCONS_00520292	NONMMUT135292.1	2.399789242	0	0	0.692541829	1.968747057	0.606119282	0	0.486658092	0	0	0	0	0	0	0	0	10.10574356	0	0	0	0	0	0	0	0	2.189731828	3.354011136	0	0	0	1.857292897	0	0.248320724	0	0	0	0	0.358713845	0.695881529	0	4.207010953	8.294669316	0.797050983	15.28087248	0	0	0	0
TCONS_00816952	NONMMUT072113.2	14.40926806	29.29474675	5.12747778	4.385741072	10.71140805	5.431756014	6.174455769	1.031496347	2.565743767	0.815991758	0.610665664	0.64019605	1.104443541	1.320537905	0	1.051395685	0	0.733037244	1.402812492	0.745689699	2.24403047	0	9.626465978	4.839089791	0	5.522047452	0	0	1.603606139	1.042192089	0	0	0.046375927	0.601412222	0.11180112	0	0	0	0	0.319520777	0	0	0	0	0	0	0	0
TCONS_00286214	NONMMUT023597.2	9.312527363	16.21432248	16.0566061	19.27961036	37.17033324	28.53857755	12.90945916	25.72195598	91.80974747	42.35279316	113.9354749	53.40132028	65.82962509	89.39979458	48.29146992	63.79879321	5.755589045	11.11499563	19.51526894	4.478508025	6.205910448	7.562747554	17.73600034	15.4636509	13.93357242	12.3795851	4.607575207	12.21689414	8.353122539	2.175462208	8.134481264	3.064940005	2.058820247	6.341268006	2.264436801	3.835815553	5.357136638	4.183043312	0.62641999	2.968214773	1.078704723	0	6.171555746	1.014517821	8.453221937	6.445666426	2.070895787	0.473219473
TCONS_00297985	NONMMUT136346.1	0	0	0	0	0	0	0	0	0	0	0	0	0	0	0	0	0	5.253797091	0	0	0	0	0	1.452037291	2.006356604	0	0	0	0	0	0	0	0	0	0	0	0	5.724087904	0	0	6.451592247	0	0	0	0	0	0	0
TCONS_00816957	NONMMUT072085.2	23.62738594	0	7.136238826	53.68876926	0.895584141	2.488225332	15.37082837	58.50132384	62.90960148	55.16278166	107.0175069	94.8527972	42.08855315	72.28162486	75.62303198	66.09052798	1.701245041	0.220767947	0.268211928	0	0.229416917	0.832462462	0	0.498150093	0	0	0	0	0	0	0	0	0	0.369474793	0	0	0	0	0	0	0	0	0	0	0	0	0	0
TCONS_00491331	NONMMUT021887.2	0	0	0.023282213	0	0	0	0.066857959	0	0	0	0	0	0	0.029878866	0	0.071393016	0	0.128192553	0	0	0	0.14718431	0	0.027419521	0	0	0	0	0	0	4.453186706	4.06595044	0.605112442	0	0	0.875934995	2.298750256	0.240195782	0	0.146590377	0.444864081	2.281868892	0	1.609491672	2.817398107	0.195985905	1.44797362	0
TCONS_00491332	NONMMUT013641.2	0	0	0.011714753	0	0	0	0	0	0	0	0	0.022836838	0	0	0	0	0	0	0.265594875	0.012844922	0	0	0	0	0	0	0	0	0	0.180013273	0.910379818	0.224487934	1.00300316	0.193734969	0.350552985	0	0.343675051	0	0.302817142	0	0.522780956	0	0	0	0.192975437	0.03250775	0.06843859	0
TCONS_00479489	NONMMUT111964.1	0	1.669591307	0.348565462	0.354464004	0	0.055457528	0.238465299	0	1.03084011	0	0	0	0.29630572	0	0	0	0	8.650315345	13.70773999	3.475691811	3.005010546	11.77485302	21.18234081	6.763614933	8.675017985	16.06942872	10.13312072	8.242570917	14.15292267	6.021579573	9.647151802	9.526408167	6.132295319	6.757113268	9.469975748	10.43780758	7.545011836	13.06155173	10.1380084	6.067025211	22.69232042	35.69303369	18.05078384	11.68251427	7.981924865	13.19441082	7.142290884	0
TCONS_00792747	NONMMUT034071.2	0	0.535560523	0.402258899	0.240687813	0.781791631	0.361912528	0.307336862	0	0.194544017	0	0.127180049	0	0	0	0.054177048	0.047405721	0	0.439897483	0.146723041	0.052246356	0.135497272	0.401931736	0	0.0295223	0	0	0	0.059978468	0	0	0	0.55111604	0.017862658	0.068407077	0.037895322	0.224183679	0.034210138	0.144414849	0.160517704	0.007167029	0	0.252978813	0.034290612	0	0	0	0	0
TCONS_00174025	NONMMUT014129.2	0	0	0	0	0	0	0	0	0	0	0	0	0	0	0	0	0	7.359780334	7.972672203	1.478903951	4.422850763	4.380236605	24.05248951	5.569576097	3.131973386	8.678753134	0	9.212212816	0	3.384450542	0	0	4.001488558	4.119373801	5.891872246	1.240090142	0	5.370918945	11.26377773	1.269883138	13.02975251	12.67626236	8.546317782	8.714959756	7.184224552	2.24500096	16.75739937	0
TCONS_00525020	NONMMUT139470.1	0	0	0.010781894	0	0	0	0	0	0	0	0	0	0	0	0	0	1.859189112	0.098335919	0.420721298	0.11446851	0.029572212	0.108289685	0.147824966	0.062499591	0.182046348	0.588486613	0	0.179065715	0	0.089769602	0.059179043	0	0.041649765	0.118112817	0.049317771	0.06477247	0.083062216	0.071711792	0	0.008644931	0.139074742	0.418173978	0.132190309	0.159808563	0.061386525	0.081597075	0.040362127	0
TCONS_00366640	NONMMUT075201.1	17.42153952	8.67012061	0.811990496	4.336377857	0	0	2.242620462	3.952393487	10.17042075	4.824536979	11.59772379	8.680070915	8.296268735	14.4906404	1.851229719	13.67291608	0	0	0	3.245865317	3.086858411	0	0	3.736268666	0	0	0	0.499380722	0	0	0	0	2.526993084	3.408850589	0	0	0	0	0	3.570404131	0	0	0	4.596882776	0	0	0	0
TCONS_00310468	NONMMUT006722.2	3.567318032	0.569333119	5.046348449	3.557835675	5.386074721	7.290094552	1.980935787	4.842075686	9.442047954	2.161948774	11.94317457	5.808524633	6.242184437	9.953562514	2.550601227	6.001627492	0	0.119593508	2.087712095	1.229335687	1.208584965	1.95465587	2.548971285	3.044472299	3.390356787	11.11979235	4.376396955	1.477779477	3.265843333	0.651806198	2.445938081	0	1.582244519	0.992702406	0.840244441	0.409034549	0.606819437	1.07236234	0.441142324	0.514969316	0	0	1.471307284	0	2.655034805	0.589290359	0	0
TCONS_00831144	NONMMUT139470.1	0	0	0	0	0	0	0	0	0	0	0	0	0	0	0	0	8.387097897	86.88801287	89.37678122	69.2454932	76.11286004	76.22408136	157.2054043	74.88410631	34.10163389	29.29715082	20.5764056	73.72889133	0	155.4917032	53.99823971	14.19399362	77.15583315	214.788549	116.4411993	61.69235126	107.7533837	79.52890402	113.0329519	157.2678914	38.95718657	4.113182519	95.76767814	105.9674588	150.0322904	196.7007701	101.7711217	118.706417
TCONS_00709778	NONMMUT139470.1	0	0	0	0	0	0	0	0	0	0	0	0	0	0.195570757	0	0	0	0	0	4.752876658	0	0	0	4.276819835	6.491692771	0	0	4.789760476	0	4.710457932	0	0	21.10822912	5.483593002	18.60848789	0	1.404326185	0	0	12.853876	0	0	0	0	0	0	0	0
TCONS_00002132	NONMMUT053163.2	0.950019433	0	0	0	0.595780889	0.606078374	0	0	0	0	0	0	0	0	0	0	4.479989892	0	0	0	0	0	0	0	0	0	1.707636687	0	0	0	1.143950743	2.443648523	0	0	0	0.107171905	0	0.339755912	0.183132271	0	0.950385761	4.654557178	0	0.887563617	0	0	0	0
TCONS_00430456	NONMMUT011099.2	0	0	0	0	0	0	0.050937899	0.031746132	0.069792666	0.057003236	0.063729906	0	0.088197581	0	0	0.021980453	0	2.885052508	4.145868297	0.88213963	0.763515216	2.140734805	1.914040264	7.463351822	1.13117323	0	0.603953183	1.076763442	0	0.567232386	0.066388918	0.448424751	0.061075407	0.185133034	0.321855144	0	0.240805165	0	0.131466954	0	0.1369486	1.723038694	0.438371182	0	0.253496601	0.675016443	0.119988816	0
TCONS_00430457	NONMMUT136346.1	0	0	0.033199984	0.019661007	0	0.021831203	0	0	0	0.039561948	0	0.068872685	0	0.064528599	0	0.024082106	0	0.118226427	0.10994024	0.161432756	0	0.261719396	0	0.326145167	0.212820524	0.38764419	0.410341397	0	0	0.035630985	0	0	0	0.161862716	0.298018221	0.119251744	0.315520107	0.245028197	0.165511901	0.078487709	0.339682554	0	0.507020987	0.685974227	0	0.448270515	0.063269405	0
TCONS_00430459	NONMMUT136346.1	0	0	0	0	0	0	0	0	0	0	0	0	0	0	0	0	98.89975892	221.462831	238.2909683	73.65012923	78.6764841	125.3713511	421.2648154	158.4108481	124.1027122	122.3095764	91.82708398	161.5227933	163.7942034	90.14110139	133.1425404	29.50289499	56.49990143	10.34697034	64.24062016	93.23203765	112.754906	120.4499139	130.7689624	32.44085006	85.67366817	0	28.28656578	0	160.8081405	80.2587734	66.63068513	0
TCONS_00075513	NONMMUT122446.1	0	0	11.76040446	15.27397808	1.676165628	5.873616289	10.66223467	18.96148428	12.55407132	11.6944107	0	27.36030272	13.12840462	22.81803346	8.962454818	17.2162251	71.9649407	35.79457709	53.23040391	57.65134072	70.43268591	82.90219263	73.44595521	115.0621577	38.61675262	0	17.66182579	29.32404267	15.83519326	8.472191112	0	0	39.50748188	50.49669213	19.87554363	24.66764463	16.56051226	12.95223384	9.310906112	23.37406561	0	0	33.0582073	19.97073929	6.257152815	31.16673999	0	0
TCONS_00075516	NONMMUT056424.2	0	0	0	0	0	0	0	0	0	0	0	0	0	0	0	0	0	0	0	0	0	0	0	0	0	0	0	0	0	11.68453584	22.15314011	0	0	0	0	5.249076721	13.1421326	11.53004806	5.292195558	0	19.01134217	12.52371613	8.443445946	0	21.58485426	3.362192715	12.24810001	0
TCONS_00529684	NONMMUT062587.2	0	0	0	0	0	0	0	0	0	0	0	0	0	0	0	0	7.447464522	0	0	0.016708434	0	0	0	0	0	0	0	0	0	0	0	0	0.013597949	0	0	0	0	0	0	0	1.621746567	3.723595147	0	0	0	0	0	0
TCONS_00811425	NONMMUT106537.1	0	0	0.013285885	0.026499619	0	0	0	0	0.129323135	0	0	0.066035685	0.175759312	0.077047774	0.063712208	0	0	0	0.356879608	0.115476581	0.058852418	0.366252565	0.133498317	0.527457946	0.166129261	0	0	0.169948988	0	0.134313074	0.134181101	1.408468894	0.415388681	0.305977029	0.123762096	0.31244917	0.177105887	0	0.395280123	0.28063448	0.125067214	0.678489176	0.297642511	0	2.24836936	0.268516638	0.389990205	1.480450644
TCONS_00148154	NONMMUT070039.2	0	0	0	0	0	0.022103923	0.060051557	0	0	0	0.171214672	0	0	0	0	0	0	0.099692564	0.152125215	0.128973784	0.182450458	0.149966914	0.178171413	0.057299234	0.134842182	0	3.136896228	0.226058845	0	0	0.292362861	0	0.217827678	0.405550167	0	0.171304384	0.161403433	0.664828718	0.414729354	0.271631992	0	0	0.127012426	0	0.385518193	0.2510612	0	0
TCONS_00713627	NONMMUT126005.1	0	0.274319563	0	0	0	0	0.167705981	0	0.070668114	0	0.596341822	0	0.058630594	0.071075483	0.772889762	0.029359943	0	0	0	0	0	0	0	0	0	0	0	0	0	0	0	0	0	0	0	0	0	0	0	0	0	0	0	0	0	0	0	0
TCONS_00826404	NONMMUT137570.1	0	0	0.274948107	0.108358277	0.390368817	0.122723814	0.304138168	0.442675153	0.097272008	0.292460635	0.39166755	0.160964498	0.317924592	0.452710085	0.108354095	0.221226698	0	0	0	0	0.033182464	0.030917826	0	0	0	0	0	0	0	0	0	0	0	0	0	0	0	0	0	0	0	0	0	0	0	0	0	0
TCONS_00211904	NONMMUT074149.2	0	0	0	0	0	0	0.1136428	0	0	0	0	0	0	0	0	0	0	1.590155361	1.489775486	0	0.369128362	0.575628082	0	1.076455972	1.05090392	0	0	0	0	1.467545268	2.873594977	0	0	0	0.57779737	1.469047091	1.708249056	0	0	0	4.589091292	0	0	2.442380675	1.376897048	0	0	0
TCONS_00293506	NONMMUT023597.2	0.088649463	0	0.19881694	0.022068969	0.251592703	0.34362668	0.067613061	0.205622609	0	0.041183775	0	0.071427996	0.079030755	0.024794583	0	0	0	0.231339345	0.474574969	0.033170552	0.121500909	0.901950276	0	0.25158885	0.465220059	0.32944669	0.255066671	0.195889676	0	0.098738978	1.033334805	0	0.013910545	0.181576547	0.096027936	0.078558953	0.097498895	0.04048696	0	0.105272692	0	0	0.299151298	0.205556709	0	0.248658073	0.282924351	0
TCONS_00293505	NONMMUT075218.1	0	0	0	0	0	0	0	0	0	0	0	0	0	0	0	0	0	0	0	0	0	0	0	0	0	14.59393895	3.18159069	2.639652365	4.577229081	0	0	0	0	0	0	0	0	0	0	0	1.390997557	1.982847935	0	0	0	0	0	0
TCONS_00573519	NONMMUT047081.2	0.157550284	0	0.139202298	0.103072801	0.040364136	0.101601682	0.122441831	0.189907641	0.049511452	0	0.339072194	0.075271023	0.113101674	0.11389141	0	0.152045949	27.05126851	1.922596095	6.682465024	14.89454941	15.35078507	11.21859496	7.445950048	3.020340976	3.592560221	13.57019201	6.550628413	4.517248308	6.642404539	6.447179268	31.65198139	26.0745858	31.28907366	15.27349661	22.03081526	26.24565027	13.92964998	14.08444378	6.489395964	6.850519747	9.783632969	15.84760475	10.55139273	11.60825102	12.94687781	5.391087045	7.818781384	3.525629058
TCONS_00833789	NONMMUT031618.2	0	0.165551939	0	0.02893166	0	0.057530197	0	0	0.151209337	0.065458008	0.073185879	0	0	0	0	0.032915372	0	0	0.185522654	0	0	0	0	0.054189742	0	0	0	0	0	0	1.107756202	0	0.017721246	0	0	0.560765861	0	0	0	0	0	0	0.500814387	0	0	0.187749735	0	0.500415995
TCONS_00278559	NONMMUT112150.1	0	0	0	0	0	0	0	0	0	0	0	0	0	0	0	0	0	0	0	0	0	0	0	0	0.016447087	0	0	0	0	0	0	0	0	0	0	0	0.104033031	0	0	0	0.392085717	0	0	0	0	0	0	0
TCONS_00278554	NONMMUT044096.2	0	0	0	0	0	0	0.017818302	0	0	0	0	0	0	0	0	0	0	0	0	0	0	0	0	0	0	0	0	0.048342645	0	0.357504502	10.15353666	0	0.63340987	4.09801786	0	0	1.65252074	1.157889882	0	0	0	0	0	0	1.390472394	0.603097414	0	0
TCONS_00278552	NONMMUT013638.2	0	0	0.032149289	0	0	0	0	0	0	0	0	0	0	0	0	0.107010514	0	0	0	0.314509015	0	0	0	0	0	0	0	0	0	0	0	1.213006405	0	0	0	0	0	0	0.339288846	0	0	0	0	0	0	0	0	0
TCONS_00215822	NONMMUT142450.1	5.730726992	4.928977887	5.572333996	9.138708346	5.349770421	6.07601513	5.454183175	9.293869986	17.18251666	7.322390086	11.90909949	13.98006846	11.7333515	20.46968696	9.660959494	12.2851136	7.128899361	10.6228986	18.40801539	13.23966182	14.6576764	12.23973345	12.51536956	13.2686536	9.972747894	3.440571114	5.032172596	7.182751392	8.902705221	12.54870575	13.93997927	10.18903335	18.79011006	15.25562058	13.40838242	16.26391661	12.37165186	12.97549758	9.846269937	7.859640622	15.80336813	9.836069223	11.16056545	12.42985796	9.268662144	8.561969028	9.201113438	3.286619628
TCONS_00215823	NONMMUT142450.1	0.055844773	0	0.032787562	0.160912042	0	0.085252143	0.076202342	0.03285282	0.149117989	0.108715594	0.11403121	0.256517048	0.026970603	0.302462572	0.112200666	0.377981616	4.84540287	2.690300846	3.572877726	4.023338901	5.229967736	2.631957223	17.27311935	4.296948134	1.952142764	0.446045179	1.004854801	6.784944205	2.287679649	1.998445048	2.369290817	1.26370908	2.527789461	4.134569702	2.27393189	3.418807777	1.268956667	2.704014705	2.070094557	4.408724056	1.418762478	2.170811193	0.588598353	1.174574341	2.182872372	1.436152207	0.796797963	17.01286399
TCONS_00215824	NONMMUT018141.2	0	0	0	0	0	0.025649277	0	0	0	0	0	0	0	0	0	0	1.041360064	0.257626958	0.613903035	0.099301831	0.198988598	0.252861439	0.798645543	0.096578904	0.640649959	0	1.124489546	0.49830111	0	0.170854271	0	0	0.057554974	0.109995858	0	0.301889311	0.120146006	0.201939167	0.116589875	0	0	0	0.174196308	0.327055849	0	0.394090932	0	0
TCONS_00119433	NONMMUT139470.1	0	0	0	0	0	0	0	0	0	0	0	0	0	0	0	0	0	0	0	0	0	0	54.08179636	0	0	0	0	0	0	6.042533399	0	0	0	0	0	0	12.8927749	17.89563899	0	0	0	0	0	0	0	2.275040044	22.64028566	0
TCONS_00479171	NONMMUT081858.1	86.67465375	69.82715914	54.43905736	55.26939145	58.03328239	46.04022068	39.74050734	23.58427767	32.58709556	23.82644886	28.57114066	33.56280808	21.05646369	29.60185926	17.30994597	33.40885007	73.02905542	53.97970927	66.42128793	75.4602552	48.47443613	61.51107643	32.09898662	43.19254269	50.50355169	167.7280453	154.0201985	88.67900424	158.3737022	55.67296841	175.6282545	126.1579935	67.23906568	67.90980727	83.99492427	112.9264952	104.4373608	106.6524102	86.44451656	28.58768994	100.3500556	163.9603752	84.88658118	89.33608617	101.2556935	88.74880156	100.114752	94.41672372
TCONS_00223990	NONMMUT021781.2	85.51957758	100.6054168	57.3452883	33.82862341	83.73875672	43.93201646	33.62007281	9.48621234	16.63351345	11.08800687	18.6881374	11.430089	9.140332034	5.27581368	8.180734198	3.555650305	0	1.680372279	2.401254265	1.93784992	2.756361073	1.422219991	3.907267823	4.080975473	0.85518016	1.220926584	0.192648543	0.959715462	0.267111874	0.644733097	1.083416824	9.736383379	1.875579142	3.156595237	3.642145746	2.266823127	0.923673739	3.283563698	1.653008787	1.779870495	0.625336071	0.758936439	0.891555909	0.247957429	0.703105571	0.808324434	0.21243225	0.319959076
TCONS_00210409	NONMMUT056424.2	0	0	0.029733674	0.096679663	0	0	0.021541372	0.084076659	0.325666684	0	0	0	0	0.054847568	0	0.046030955	1.997055548	1.98517919	2.767281554	2.601657801	13.28940415	1.324689709	5.75058654	7.237919634	2.23507712	1.330809977	1.754257634	2.874168174	0.801469179	0	1.465056328	7.298797132	5.520796976	6.176155102	3.077032112	0.662364507	2.864141215	1.330122091	1.74480353	1.550152116	1.185136922	3.056237038	1.034753504	1.660446923	0.907276612	2.231368678	2.947745303	0
TCONS_00244803	NONMMUT128835.1	0.768002775	0.165551939	0.648091965	0.50567196	0.273258172	0.245447628	0.136337799	0	0.486360042	0	0.39166755	0.221326185	0.317924592	0.579886795	0.433416381	0.347752568	8.0337315	8.262116486	11.11637723	9.978565962	3.711067008	8.770907977	4.167752344	7.476147201	6.917607368	30.72197214	15.26335143	11.74036521	17.35773094	13.44276092	155.8745996	16.37145309	15.10790908	15.491625	10.11830603	15.52125984	15.7447373	12.17892362	13.13695322	4.685338007	32.92919697	74.14581324	33.19814728	83.50710293	18.39113242	61.60057003	18.80691031	12.16324427
TCONS_00032256	NONMMUT056424.2	0	0	0	0	0	0	0	0	0	0	0	0	0	0	0	0	3.706331643	9.143664656	4.958091136	4.031175398	4.926972024	5.029742833	0	6.118198839	9.786581226	10.89880464	1.989674154	0	0	7.733270095	11.43703962	0	6.245194763	8.364909311	8.045939277	0	11.40394967	5.022086767	10.65153141	5.899958743	0	0	10.19771936	0	0	0	4.402268917	0
TCONS_00144281	NONMMUT047813.2	7.585453694	6.693761559	8.305485108	5.911257058	1.373590758	6.52148894	8.458082446	2.266528405	6.674124317	3.337161953	2.323875481	8.247800756	0.90666795	15.4142212	1.38216484	3.0501473	0	1.078272187	2.48454378	0.06477198	0.213973799	0.39149697	0	0.91803869	0.744205062	7.835703328	1.244509589	1.009047752	1.714190455	2.805726736	9.652329364	7.33755896	1.203757113	2.868000752	2.017536166	3.611178547	4.627673855	4.07676117	1.904195782	0.694431089	3.66346884	6.705203435	4.79876539	7.256474159	3.535972001	2.123555676	1.30589185	3.929737371
TCONS_00536361	NONMMUT050552.2	0	0	0.067529219	0	0	0.122791994	0.057765277	0.421173789	0.123243635	0	0.120409795	0.184887846	0.35284331	0.333891099	0.68355181	0.276628184	0	0	0	0.080198659	0.045745344	0.047474322	0	0.038797163	0	0	0	0	0	0.141651654	0	0	0.236300644	0.202762321	0	0.360901858	0	0.086456852	0	0.094116918	0	0	0.095019286	0	0	0	0	0
TCONS_00830327	NONMMUT072113.2	0	0	1.313751151	0.438887142	2.864448308	0.856530407	1.147806958	0.158414466	0	0	0	0	0	0	0	0	0	0.362526954	0.211765214	0	0	0.189912745	1.490622674	0.14973215	0.341217226	0	0	0	0	0.097828766	0	0	0	0	0	0	0	0	0	0	0	0	0	0	0	0	0.272940036	0
TCONS_00394136	NONMMUT075201.1	0	0	0	0	0	0	0	0	0	0	0	0	0	0	0	0	0	4.787006722	8.728400308	0	0	1.22811788	0	0	14.01693625	0	0	19.04007461	0	0	0	4.201892397	0	0	3.136539389	0	0	7.794560678	2.697780681	0	0	0	10.74149988	0	17.30802533	14.14803704	3.931271214	0
TCONS_00816969	NONMMUT072085.2	2.368465701	2.836070271	1.996231269	1.423153534	1.103728794	2.751086106	1.688585595	0.667269554	2.011244683	1.144797274	1.285340995	1.317353572	1.389648394	1.142988492	2.902752037	2.991759253	1.33850908	0.788210968	1.802597365	0.815565894	0.674931311	0.660111042	0.351002893	0.67880441	0.907752711	3.130455761	0	0.302111542	0.492954964	1.013823832	3.869186811	0.992927399	0.611461129	0.871960511	1.17780191	0.515833126	0.241763049	1.446409809	2.068758082	0.746006683	1.070700421	1.538870119	1.162966102	2.049616108	2.702954154	1.854252559	1.121854711	8.318935975
TCONS_00710627	NONMMUT075201.1	0	0	0	0	0	0	0	0	0	0	0	0.025794561	0	0	0	0	0	0	0	0	0	0	0	10.48808898	0	0	0	0	0	49.59761051	0	0	0	0	5.570952439	0	0	0	0	0	0	0	0	0	0	22.92311971	0	0
TCONS_00237615	NONMMUT149159.1	0.057545351	0	0.010850631	0.015892547	0	0.015913188	0.036423167	0.034813239	0	0	0	0.088550594	0.028639707	0.039107187	0	0.107026316	0	0.693548427	1.208814427	0.71560722	0.570545917	1.066448568	1.178562218	0.916477987	0.781715363	0.537004209	0.873661143	0.695720236	1.244340667	0.625106663	0.2767334	0	0.466498212	0.608048729	0.512267091	0.603751955	0.63733488	0.665819982	0.362114436	0.315818077	1.315957228	2.718763302	1.390141406	1.520474955	0.67692841	0.640149259	0.193915239	0
TCONS_00839682	NONMMUT022337.2	1.140758408	0.496655818	1.038302246	1.159325208	0.973072351	1.223938234	0.949078884	0.700849627	1.423332664	0.570058952	2.815194447	1.488217387	1.359789976	1.507611642	1.5954057	1.220175854	0	0.745299231	0.907781291	0.707583705	1.030740232	0.362465132	3.573196424	1.270566881	0.344226256	0.203487764	0	0.598855011	0	0.900862801	3.31760716	0.183705347	1.778026699	2.45149184	2.344507321	0.072585699	1.38807637	0.952543242	1.53181159	0.989439356	0.710006575	2.276809316	0.502906114	0.396111993	0.722305761	0.141981095	1.955969939	0
TCONS_00366638	NONMMUT075201.1	24.4098162	18.46318002	14.03860483	16.86969819	13.66044929	14.08212132	12.05597405	12.81946139	21.27275598	15.55962362	14.06036149	13.98986717	11.4930535	17.21590287	12.11420457	13.16132934	0	0	1.826655046	0.825541691	0.853512694	1.5509309	6.039724358	2.525699485	5.359305671	23.57690629	3.161169945	4.459938882	0	3.66117378	14.90905425	8.193993287	1.069459693	0.963552823	5.293511633	4.740790161	4.548135283	7.898054888	8.007702121	1.765727134	16.29363161	19.88615852	7.606480691	7.402273127	10.28118825	6.431859371	5.103472368	0
TCONS_00071733	NONMMUT139616.1	0	0	0	0.015001601	0	0	0	0	0	0	0	0	0	0	0	0	4.842725852	2.361491748	2.453979481	1.016623593	0.746120969	6.101957575	0	6.9759122	22.2138945	0	1.279186327	4.073797507	1.682938365	3.587370803	13.02959945	10.35804227	5.612566384	2.168121477	5.153565371	13.90645469	1.392592108	2.928040485	1.123940464	0.658731021	0	1.203673192	0.854556339	35.191978	1.07786084	0.682269516	2.982584192	0
TCONS_00636570	NONMMUT124490.1	0.768002775	0	0.127654478	0.16855732	0.351331936	0.163631752	0.041950092	0	0.048636004	0	0	0.040241124	0	0	0.054177048	0.205424791	0	0.062614402	0	0.3238599	0.325188144	0	0.130242261	0	0.017096765	0	0	0.059978468	0	0.151701905	0	0.183705347	0.022328323	0.221216917	0.538527387	0	0.068420277	0.402701208	0.211022398	0	0	0	0	0	1.298041054	0.589858371	0.283243	0
TCONS_00482024	NONMMUT115959.1	6.921460438	8.871928424	4.02845128	4.60915176	6.904336163	0.998971847	1.971339703	0.600931521	0.624437658	0.249309397	1.490406934	0.930294316	0	0.830514062	0	0	0	0	1.915466784	1.603567205	1.848402593	0	0	0.998254044	0	0	0	0	0	0.658803449	0	0	0.553288404	3.341311363	0	1.75930989	2.378220408	0	1.040832809	0	0	0	1.806498015	0	3.561986907	0	0.771978796	0
TCONS_00352087	NONMMUT126005.1	0	0	0	0	0	0	0	0	0	0	0	0	0	0	0	0	0	0	0	0	0	0	0	0	0	0	0.484125789	0	0.236794677	0	0.562999319	2.155414834	0	0	0	0	0	0	0.44965356	0	1.801718288	0.878595417	0.634719226	0.384581972	0.262150208	0.107266837	0	0
TCONS_00066443	NONMMUT090143.1	2.554925803	2.63707684	2.60811846	1.25102039	1.240162696	2.810061716	2.063420156	1.222068	2.98114388	2.508541213	4.289375154	1.54594328	3.579910393	4.10148372	1.356918336	1.808180616	9.249097744	6.609503259	6.048345854	1.635364773	3.094649653	3.873292473	11.03373361	5.502519492	4.341415603	4.101702859	0	2.005619982	1.495425829	6.589039512	6.20736387	1.147239891	1.639888806	2.221741055	1.18379657	2.780309618	3.215410918	3.474258208	4.804452454	2.222216035	2.305739162	0.362771618	6.488846778	1.687226326	3.453438224	4.333580219	2.094192523	0
TCONS_00623669	NONMMUT059992.2	0	0	0	0	0	0	0	0	0	0	0	0	0	0	0	0	0	0	0	0	0	0	0	0	0	2.544614489	0	0	0	0	0	3.551024353	0	0	1.109168011	1.344648749	4.939772949	2.411281904	3.23173769	0	0	18.2888503	2.52351471	16.50404647	0	2.371230652	2.706068213	0
TCONS_00296590	NONMMUT038240.2	0	0	0	0	0	0	0	4.48097924	0	0	0	2.289297452	1.767263329	0	0	0	0	0	0	0	0	0	0	0	0	0	0	0	0	0	0	0	0	0	0	0	0	0	0	0	0	0	0	0	0	0	0	0
TCONS_00531219	NONMMUT013598.2	0.49371607	0	0.20621108	0.313035023	0.156147527	0.299991546	0.136337799	0.031619654	0.243180021	0.425397287	0.503572565	0.80482249	0.13246858	0.400474306	0.812655715	0.47405721	0	0.208714674	0.360144922	0.118596583	0.471190984	0.278260433	0.130242261	0.160954913	0.222257939	1.220926584	0.385297086	0.119956935	0	1.384279885	1.741983282	13.59419566	1.860693594	0.59566909	0.72276044	2.559965888	4.447318005	1.610804833	0.808919194	0.810462271	1.000537714	4.300639819	2.057436713	0.247957429	4.813568908	0.218466063	1.664052623	4.479427063
TCONS_00324831	NONMMUT006722.2	0.43759701	0	0.295402282	0.096679663	0.985368969	0.358503533	0.210369224	0.129419243	0.560529949	0.271483231	0.354962706	0.556896922	0.377747403	0.294696853	0.06203272	0.206609934	0	0.944799152	1.205645152	0.154285032	0.265539347	0.306380196	0.641312892	0.457363332	0.883697563	4.129377195	0	0.619457615	0	0.802806482	3.656568073	0	0.206060651	0.296047793	0.833144382	1.450967332	0.739075832	0.554054908	0.323638018	0.113361424	2.176169528	1.448809661	0.353810533	0.261223151	0.310177727	2.004229512	1.733305536	0
TCONS_00813062	NONMMUT022127.2	7.224876391	1.920402495	11.06795747	24.80248727	4.0898941	12.02765649	27.5555053	28.92312973	38.11730105	29.60770434	40.88679106	40.02005988	33.19392384	43.09613699	44.97643055	48.62294194	1.33850908	0.013326432	0	0.549111302	0.396344619	0.033066615	0	2.081822531	0.017096765	0	0	0.671668871	0.133555937	0.417180239	0	0	0.212267925	0.467337754	0.099202413	0.266663113	0	0	0	0.615252103	0	0	0	0.123978714	0	0	0	0
TCONS_00827856	NONMMUT057411.2	0	0	0.029203417	0	0	0	0	0	0	0	0	0	0.061041522	0.059287609	0	0.01698705	0	0.554732297	0.267971832	0.011645272	0.117684926	0	0	0.124909828	0.329711103	0	0	0.169169268	0	0.079188395	0.326863807	0	0	0	0	0.13735817	0.048099455	0.04463788	0.147574997	0	2.675187713	0	0	0	0.686609632	0.120658807	0.086920196	0
TCONS_00272220	NONMMUT009005.2	0	0	0	0	0	0	0	0	0	0	0	0	0	0	0	0	0	0.22315773	0	0	0	0	0	0	0	0	1.304037989	0	0	0	0	0	0	0	0	0	0	0	0	0	0	0	0	0	0.365885322	0	0	0
TCONS_00727936	NONMMUT022630.2	0	0	0	0	0	0	0	0	0	0	0	0	0	0	0	0	11.10427133	1.03494302	0	0	0	0	0	0	8.428003931	7.739657104	10.20671246	0	24.11138757	0	22.45972917	0	0	0	0	0	0	0	0	0	0	0	18.76906929	56.68220041	0	0	1.737695803	0
TCONS_00528104	NONMMUT136346.1	0	0	0	0	0	0	0	0	0	0	0	0	0	0	0	0	0	14.02722279	10.9008425	5.991440072	6.368988984	14.95544707	26.16345607	14.11251125	12.69675829	0	0	8.650934315	0	14.65795007	7.092194601	0	6.879884791	12.86529522	18.08862473	11.68603095	14.54207988	6.582089294	15.29659161	4.329974139	9.747613611	9.727541313	7.074461848	0	7.667041739	11.9385805	3.895228542	0
TCONS_00721035	NONMMUT128298.1	0.412472348	1.748228478	0.323162221	0.538998151	0.446972296	0.631304936	0.569273237	0	0.400128407	0.325428924	0.261298209	0.482511203	0.206995403	0.244480858	0.56262864	0.42118403	0	0.650970634	2.297628566	2.131103051	1.09226052	2.072962931	0	0.768258885	2.601922396	2.056243855	2.550281414	3.468164929	2.694090366	1.230928221	2.88515981	1.699090752	1.431297612	1.127151242	1.279470212	1.294142755	2.367820526	1.796357159	1.737980473	0.954525912	2.516102216	0	1.527543888	0.578980597	5.350308883	2.854368351	2.488785427	0.903244471
TCONS_00574892	NONMMUT139470.1	0	0	0	0	0	0	0	0	0	0	0	0	0	0	0	0	0	2.639395337	5.494490983	9.016948376	12.99034388	16.82543447	5.655770174	6.872065901	3.506375431	1.559123248	0	3.575196504	4.16240434	3.437110066	8.839258667	0	6.776013432	18.65650736	12.80945493	6.963800538	9.136604319	8.564029755	4.429500823	14.72474869	1.159248009	0	9.450766961	0	5.017685863	8.327554942	5.312257864	0
TCONS_00183530	NONMMUT086493.1	1.476814479	1.544599593	0.735309433	0.843039437	1.12406701	1.752864237	0.902556232	0.256467012	0.592435168	0.331969408	0.521253557	0.39112361	0.295325453	0.737360257	0.163831392	0.766218669	0	0.555295827	0.612966658	0.624192062	0.27700057	0.5867585	2.086871744	0.434310204	0.469425863	2.344992992	1.989288857	0.553001472	0.549716238	0.519010143	1.787903896	1.11766333	0.644075366	0.362438393	0.760074719	1.275822999	0.591938026	0.818288855	0.536665129	0.120544344	0.636467053	1.536340331	0.592164577	0.635018976	1.477116634	0.355619058	0.648838901	0.974915304
TCONS_00498334	NONMMUT152809.1	1.259634266	0	0	1.667248613	0	0.265901597	0	0.480270922	0.558633145	0.439541747	0.968873615	0.316858614	0.683776317	4.717900736	0	0	0	0	0	0	0	0	0	0	0	0	0	0	0	0	0	0	0	0	0	0	0	0	0	0	0	0	0	0	0	0	0	0
TCONS_00498333	NONMMUT152809.1	0	5.280775758	4.957805339	15.75848406	6.757752672	3.796011203	5.121193832	5.135284736	9.087929207	7.946793541	7.961090582	10.72285124	5.005431278	7.509154412	2.850633717	11.02595444	0	0.053232678	0	0	0.151750043	0	0	0	0	0	0	0	0	0	0	0	0.061067964	0.055908322	0	0	0	0	0	0.249002614	0.143577162	0	0	0	0	0	0	0
TCONS_00814121	NONMMUT072081.2	4.969910529	1.728196694	1.399829547	1.407200787	0	0.967636367	0	0	2.051807111	0	1.51732009	1.100494152	0	0	3.768230373	0.518334154	0	0.068364492	0.122329225	0.028143881	0	0	0	0	0	0	0	0	0	0	0	0	0.023489396	0	0	0	0	0	0	0	0	0	0	0	0	0.237123065	0	0
TCONS_00481630	NONMMUT056424.2	0	0	0	0	0	0	0	0	0	0	0	0	0	0	0	0	0	0	6.059054163	2.199182052	0	5.622839486	13.94660177	0	8.192666968	0	0	0	0	1.698075276	0	0	22.73617972	1.867947138	10.26865438	0	0	0	0	0	0	0	0	0	0	0	0	0
TCONS_00483733	NONMMUT111623.1	0	0	0	0	0	0	0	0	0	0	0	0	0	0	0	0	0	0.048160911	0.632342455	0.060602854	0.132072842	0.241839234	0	0.69736605	0.09955446	0	0	0.58595964	0	0.989551527	7.883877614	2.573160792	1.624058025	1.172236951	0.638027407	0.129518274	0.996062393	3.933833218	1.187669228	0.656093045	0	0	1.516262276	0	1.813850118	1.111533484	2.64531259	22.71357484
TCONS_00463259	NONMMUT044546.2	78.56256958	0	1.904830662	5.440873777	3.61918738	14.73401659	5.733927365	8.778564488	42.07685543	10.13844036	53.27176663	28.79992894	17.59733814	58.02278944	20.88828579	40.41005879	0	12.36102223	12.70408813	15.30825991	29.56847527	16.68658251	35.12790064	26.370312	43.41516474	53.07103326	40.50955771	31.53586862	38.29863412	27.32170275	44.94713652	15.88628727	12.36434614	26.16424366	10.96387906	2.651564667	23.14900863	23.09581262	17.21788021	14.46727595	7.217879069	0	3.131384387	27.90587293	0	17.14893057	20.21377829	72.94714977
TCONS_00814236	NONMMUT072112.2	0	0	0	0	0	0	0	0	0	0	0	0	0	0	0	0	0	1.893104711	0.5057155	0	0	0.451199292	3.120995295	0	2.127145246	0	0	0	2.37969969	0	1.448942983	0	0.451597778	0	0.757722205	0.739510146	0	1.392385893	1.018710628	0.552886237	0.375201643	2.078979884	0	0.247957429	1.605081848	0.273322892	0.405143706	0
TCONS_00479493	NONMMUT086470.1	0	0	0	0	0	0	0	0	0	0	0	0	0	0	0	0	0	0	0.661130039	0	0	0	0	0	0	3.2179555	7.840410409	1.295414946	3.361602941	1.402749592	0	0	0	0	0	0	0	0	0.310202926	0	0	1.588706945	0	0	0	0	0	0
TCONS_00479492	NONMMUT059962.2	0	0	0	0	0.061326941	0	0	0	0	0	0.085775194	0	0	0	0	0	0	4.588310352	5.19679519	1.070338722	1.166350325	3.790123522	5.759963982	3.42530163	1.69805065	4.756322996	0	2.498283116	2.238798176	1.585740015	1.216097884	1.555800582	1.047816105	3.364471072	3.042452985	1.207183914	2.399259643	3.114150397	2.993809936	2.747618066	3.676851032	2.87055059	3.368366806	2.716125677	2.278440645	3.02483742	2.00893638	0
TCONS_00479490	NONMMUT086470.1	0	0	0	0	0	0	0	0.051919472	0	0	0	0	0	0	0	0	2.316959218	6.224904728	3.249539615	1.173440206	0.801721505	4.972838574	17.63519283	5.05407361	6.237053561	0.633050434	6.202127198	3.402788399	0.406410717	2.791201279	2.753011023	0	1.045099492	1.146431147	2.375217554	1.803922629	1.703288586	2.397001499	2.624098694	0.952952662	0	0	4.962708805	0.510048431	1.938245719	4.225242898	1.388882049	0
TCONS_00827630	NONMMUT072113.2	15.94834563	26.67720504	7.54441893	5.408029179	20.14884747	13.17982857	4.978164993	0	0	0	0	1.350391535	0	0	0.690757358	0	4.015527241	3.958879072	1.214504717	0.442798588	0.479526419	1.868348759	0	2.692128771	2.616796581	0	0	2.08988973	0	0	1.351875803	0	0	0	0.51657531	0	1.184115524	0.638219461	0.392501661	0	0	0	0.445880826	0	0.331649489	0.532904268	0.484239313	0
TCONS_00026924	NONMMUT047831.2	6.627699376	3.288523721	8.934261969	8.258285304	16.81638599	19.05249034	15.64555953	19.60140283	14.72075667	11.24431378	11.65238939	9.487871249	25.64467192	18.94974767	33.96077398	9.805288728	3.91513906	0.541510223	0.588596851	1.133391052	2.524050645	0.450550018	0	1.105108567	0.738956355	0	0.274524174	0.379123895	0.178030064	2.624689475	1.550607063	0	3.225378374	4.307552822	3.143370183	0.77822963	1.61550537	0.270553258	0	0.958689464	0	0	0.139014141	0	0.725388609	1.364342412	0.466253383	4.591092781
TCONS_00432355	NONMMUT149159.1	0	0	0.261878252	0.038298631	0	0.196930814	0.035342953	0.11054231	0.170226015	0.292460635	0	0.431505578	0.213857276	0.281533437	0	0.046773645	65.90015606	4.358745081	7.064386709	11.10713561	12.57191965	20.97250429	17.3253465	18.06877347	4.65250833	0	7.025314423	0.451607873	0	0	0	0	2.367583742	7.704483223	0	0	0	0	0	1.957504755	0	6.664473846	9.35547335	8.207514878	0	1.543375351	0	0
TCONS_00812865	NONMMUT053160.2	0	0	0.009819575	0	0	0	0.010655323	0	0	0	0	0.020160803	0.026493716	0.017429338	0	0	0	0.957948177	0.556880089	0.525706722	0.521747786	0.623272452	0.130242261	0.024000272	0.241679863	2.677085023	0	0.151295685	0.133555937	0.095553238	0.731439425	3.78249309	1.475537462	1.094998214	0.943769245	1.129824945	0.137832648	0.062356733	0.422748205	0.056780033	1.379116172	0.506716562	0.207321039	0	0	0.345984705	0.46458933	3.19959076
TCONS_00323126	NONMMUT059992.2	0	0	0	0	0	0	0	0	0	0	0	0	0	0	0	0.016260162	0	0.077140944	0.037887246	0.019016506	0.023373727	0	0	0.024637658	0.024875792	0	0.577752981	0	0.243071806	0	0.280217366	0.215853782	0.08783218	0.06295323	0.164959442	0.037386168	0.121206521	0	0.164667812	0.023646429	0	0.631941075	0.372018848	0.308087106	0.218557662	0.030170163	0	0
TCONS_00665886	NONMMUT059992.2	0	0	0	0	0	0	0	0	0	0	0	0	0	0	0	0	0	0	0	0	0	0	0	0	0	13.62899997	0	0	0	0	10.14526224	0	0	0	0	0	0	2.207453138	2.456160035	0	7.299172758	8.599761765	4.481062871	7.962780896	2.55000165	2.635552742	0	0
TCONS_00305432	NONMMUT074149.2	0	0	0.026287003	0	0	0	0	0	0	0	0	0	0	0	0	0	0	1.089448857	0	0	0	0	0	0.373853824	0.709652501	1.475082801	0.708368693	0	5.531352697	0	0	1.94433739	0	0	0	0	0	0	1.167129715	0	0	2.251764413	0	1.472867128	0	0	0	0
TCONS_00740050	NONMMUT045070.2	5.674498218	1.530527678	3.338734136	13.64920591	6.367657113	4.057794735	3.960162108	7.761455084	8.745580373	3.286965073	6.139612662	10.44633435	7.774978378	10.34766406	0.740166825	4.739861019	0	0.915673019	1.309558967	15.67595949	17.32952174	3.394931871	7.872884179	2.077384655	2.36210608	0	1.584534267	2.435965488	3.436394265	1.436958371	3.309816624	3.616239751	24.36358699	14.12836724	9.63445335	7.530646318	5.022287803	7.834180281	3.453029845	11.08461302	4.740297554	2.058235622	2.384054791	3.027560208	5.085292168	4.138926956	12.21287166	64.21514663
TCONS_00256414	NONMMUT135292.1	0.461569668	0	0.405234231	0.239399554	1.443427739	1.145572261	0.155844592	0.041326888	0	0	0	0	0.029990887	0.038967891	0	0	0	0.082953647	0.197383427	0.082520415	0.223125522	1.086591532	0	0.094345074	0.989218794	0	0	2.144380168	12.19445841	2.955285852	12.82109373	18.40690834	0.758068898	0.069394045	0.71924584	4.68881752	7.278891168	1.773434167	0.327752955	0.023678211	0	0	7.271804319	8.488326666	10.80721939	0.485955911	2.723806306	0
TCONS_00537823	NONMMUT132885.1	648.4974289	1836.620135	740.0785941	642.315059	739.6681027	845.182163	700.9719124	245.5817249	345.392864	300.7396103	519.574758	430.8561265	222.0170755	387.5058334	309.1691782	361.6048828	239.9665694	115.4216256	248.5977157	179.9097619	159.9793867	227.945366	159.2526824	124.9848851	118.4272019	303.8351095	145.3945526	104.4625479	133.7454531	252.4684925	293.6432185	342.1899702	235.5285525	273.3037332	255.6856747	395.2014271	352.5073223	265.8986514	184.6376348	168.1117892	247.2712648	205.9399324	281.7974024	216.6137503	233.5034694	275.6635154	195.4578508	206.5870167
TCONS_00574888	NONMMUT118386.1	0.550767704	1.046950464	0.447959203	0.762649635	0.53367321	0.446196516	0.338925282	0.129956777	0.048976456	0.070748886	0	0.202131168	0.035395605	0.070100415	0	0.11004448	0	0.532347649	0.840842355	0.710690023	1.335945897	0.371013911	3.417296438	0.574958111	0.574126449	0	0	0.509816976	0	0.262652886	1.863438227	0	0.652976924	1.418800221	2.11594496	1.157264579	0.962741718	1.239080641	0.636302872	1.933484878	1.000537714	0	0.519777095	1.374180071	1.520114244	0.043758752	1.56088136	13.63025664
TCONS_00574889	NONMMUT056424.2	0	0	0	0.012268565	0	0	0	0	0	0	0	0	0	0	0	0	0	0.053817079	0	0.024426335	0.03510041	0.062160289	0	0.122675998	0.021234182	0	0	0.603353396	1.059766362	0	0.195973119	0.315973196	0.019425641	0.010737529	0.018097355	0.128744951	0	0	0.06513558	0.026117544	0	0	0	0	0	0.057522114	0	0
TCONS_00633890	NONMMUT021663.2	21.82268914	17.45728644	16.28537274	48.15019243	15.19569177	12.12642189	14.63189848	17.31814763	21.23681398	16.87580283	24.07048883	30.36713966	14.03417178	26.1540889	26.53510529	21.21413918	2.606077179	1.458059844	2.407448757	6.78303121	5.574514529	3.998509668	3.361162024	6.151468017	1.16964095	0	0	0.709725209	0	4.579558151	4.593997021	5.398916436	11.87509537	8.928025482	6.726476321	3.459873896	1.674073127	1.785484226	2.898568493	8.034120436	0.23750264	0	0.043034718	0.196878199	3.269170479	3.913033047	2.563596984	0.344595925
TCONS_00318114	NONMMUT029956.2	10.53260949	6.949870409	7.909422361	13.98273269	6.475008538	7.613008179	7.494247617	17.61287443	31.63781803	18.8102704	20.57524761	18.96332811	20.92436602	25.6813551	24.70251248	16.38028842	0	0.012731595	1.200483074	0.22871351	0.217537595	0.140815238	0	4.326470434	0.058607709	0	0.254296077	0.38986004	0	0	0	0	0	0.570058978	0.325950787	0	0.034210138	0	0	0	0	0	0.034290612	0	0	0	0	0
TCONS_00257302	NONMMUT131167.1	3.658710363	2.47318042	1.856822759	3.968983098	2.195863635	0.506235733	2.106156812	1.387723366	5.203663365	2.240088938	3.627345089	3.59864304	3.482519493	2.024397616	2.495611524	2.577370044	0	0.46267869	0	0	0	0	0	0.480285409	0	0	0	0	0	0	0	0	0	0	0	0	0	0	0	0	0	0	0	0	0	0	0	0
TCONS_00206204	NONMMUT022630.2	0.978216106	0.893152712	0.741063704	0.427027931	0.74423815	1.239251439	5.313356716	1.386426961	0.370411808	0.795546101	0.676353907	0	6.849499889	1.731111128	1.491981716	1.091722152	0	0.330343151	0.277935841	0.320032879	0.101750707	0	0	0	0.209811494	0	0.238498896	0.440391899	0.165609362	0.846325966	0	0.470101982	0	0.279320391	0.293780861	0.099252011	0.473776208	0.117557776	0.081700839	0.691832842	0	0	0.335225022	0	0	0.496114583	0	0
TCONS_00175853	NONMMUT078212.1	0.217125356	0	0.226645616	0.264333997	0.342470564	0.084202172	0.045085861	0	0.495844063	0.144448966	0.553090534	0.02468793	0.271269159	0.61645184	0	0.124487423	2.67701816	1.508683588	1.876259007	6.002218677	1.301396315	0.877988961	0.26152646	10.35843151	1.691673557	1.282379889	0.202088322	1.096736272	1.285475896	7.039632096	72.63542851	5.29530662	10.38139754	15.31945868	4.471435406	4.10895858	2.368607359	3.785174518	2.589807554	1.109197075	9.110646289	46.02823011	9.167869413	49.40117847	10.22504798	28.20099764	2.96116394	54.57893914
TCONS_00035579	NONMMUT067038.2	37.80586917	17.54850556	14.46654192	58.00724392	15.41605497	11.71511985	15.03876193	22.19712345	23.73456461	20.15319646	28.80071379	26.05148026	15.85564125	22.48194846	26.06132701	30.58890495	0	0.626144023	1.60864732	4.121171959	4.321478337	1.894412486	0.911695825	3.610125763	0.87193499	0.203487764	0.577945629	0.420209145	0.133555937	0.474106379	1.693594857	4.041517629	5.321717647	5.675073261	2.706666988	0.506659915	1.268785617	3.684003584	1.26613439	4.501800086	2.376277071	0	0.138225457	0	3.73186803	0.808324434	2.726213872	19.19754456
TCONS_00833937	NONMMUT046086.2	0	0	0	0.225541734	0	0.056139327	0	0.126478615	0	0.364299602	0	0.159415215	0.080222972	0.10069317	0.055856536	0.353536066	0	0	0	0	0.037104631	0	0	0	0	0	0	0	0	0	0.13268106	0.25939195	0.711268733	0.214742068	0.29600583	0	0	0	0	0	0	0	0.050784396	0	0	0	0	0
TCONS_00833934	NONMMUT136598.1	0.172197194	0	0.420474211	0.210335456	0.195184409	0	0.240741091	0.316196538	0.243180021	0	0.118115743	0.242030243	0.079481148	0.33941068	0.108354095	0.228669396	0	0	0	0.18391137	0.192458289	0.602913064	0	0.319997667	0.119677352	0	0.577945629	1.203467955	0.667779686	0.539793304	0	1.653348121	0.340521813	0.333475994	0.708588666	0.026666311	1.436825817	0.805402416	0.136003936	0.306164041	0.125067214	0.252978813	0.729909965	0	0.108170088	0	0.298715149	0
TCONS_00388810	NONMMUT073734.2	25.74438559	13.74081096	6.363929234	19.9739702	11.78913829	7.077086918	9.296937463	11.54123688	12.40218108	10.5817841	11.97590678	13.13872715	4.609933085	3.238618299	2.817206479	6.212867385	0	0.114803507	0.312149609	0.46873931	0.831711815	0.670252088	0.130242261	0.125094492	0.769354403	0	0	0.809709314	0	1.782497386	2.322644376	2.204464161	1.816855652	2.646639194	1.36049024	4.724443712	2.086818448	2.261322169	2.53226878	2.589736838	2.126142642	1.264894064	0.651521626	1.11580843	0.757190615	0.524318552	2.619997747	16.63787195
TCONS_00709786	NONMMUT139470.1	0	0	0.095073127	0	0.221612378	0	0	0	0	0	0	0	0.16269791	0	0	0	0	0	0	0	0	0	0	0	0	0	0	0	0	0	0	0	0	0	0	0	0	0	0	0	0	0	0	0	0	0	0	0
TCONS_00081571	NONMMUT050161.2	0.087168315	0	0.684856455	0.648343692	0	0.55589797	0.884664517	0.827170144	0.786833276	0.803947697	1.198838419	0.824983293	0.297047544	1.425984531	0.776248739	0.922973587	1.402757516	0.047743482	0	0.597106427	0.922080937	0.935326069	0	0.373615549	0.500610361	0.792788329	0.385297086	0.146827289	0	0.649397931	2.285627231	6.352898302	6.659988022	2.496960424	1.876626224	5.130998294	6.687226823	2.759866265	1.475468609	0.407384422	0.997411034	0.352652465	1.474839217	1.923281798	5.637013701	1.138404809	4.681829757	0
TCONS_00828628	NONMMUT136142.1	0	0	0.143041752	0.253173095	0.157201523	0.098574495	0.017168075	0.234080297	1.397604218	0.078512387	1.14394901	0.424443261	0.934406871	1.03902188	0.202513804	0.601499591	1.33850908	2.366156521	2.418517211	1.495730981	1.329913325	3.893296307	11.77611449	5.017766423	5.42499144	1.404676035	1.776797513	5.656359367	1.730884947	2.196567736	1.337939937	0.860292139	2.700461826	3.631386299	1.156416704	1.623631698	1.67215736	1.055634752	0.282488651	0.556064521	0.261265411	1.857876402	0.837959683	2.542679456	0.361071753	1.006669773	0.221885485	2.135086914
TCONS_00575929	NONMMUT149857.1	2.658990179	8.428745882	1.844381357	1.0680153	5.312919605	2.065073621	0.958244979	0.218871244	0	0.313730499	0	0	0	0.177880239	0.181763995	0.064155742	0	0.109543897	0.123649757	0	0	0	0	0	0.229182128	0	0	0	0	0	0.309734305	0	0.034541916	0.047833904	0	0	0	0.20959049	0	0	0.352564477	0	0.28245177	0.208036283	0.392765589	0.17503501	0.035405375	0
TCONS_00833440	NONMMUT123396.1	0	0	0	0	0	0	0	0	0	0	0	0	0	0	0	0	0	0	0	0	0	0	0	0	0	0	0	0	0.086410691	0	0	0	0	0.021960033	0	0	0	0	0	0	0	0	0	0	0	0	0	0
TCONS_00788317	NONMMUT139470.1	0	0	0	0	0	0	0	0	0	0	0	0	0	0	0	0	0	10.61805642	6.800808645	0.507077936	1.679165391	12.87269864	1.040375179	2.829720798	24.4438084	0	5.711451359	8.667668307	4.084140561	2.904086459	8.030930036	0	2.90569633	0	0.938128879	20.19565089	1.482838453	0	1.766081622	0	0	0.495079537	5.192010127	54.7473886	0	0	2.708936049	0
TCONS_00788316	NONMMUT139470.1	0	0	0.013767044	0	0	0	0	0	0	0	0	0	0	0	0	0	44.33142074	0.384316766	0	0.448431926	0.573565521	4.735080493	0	0.375634931	4.218370189	0.558370424	0	0.895028685	1.501168735	0.896273819	0.396252808	8.689630313	1.279085433	0.288152051	1.137171436	4.516633148	0.386027203	0.275633488	0	0.161925594	0	0	0.379631364	8.605114615	0	1.709606179	1.722825545	0
TCONS_00752943	NONMMUT059992.2	0	0	0	0	0	0	0	0	0	0	0	0	0	0	0	0	8.320172443	0	0	0	0	0	0	0	0	5.252426164	2.168259353	0	0	1.525400582	2.790221721	9.611831153	0	0	2.08972718	3.165504485	4.578616516	3.054705503	8.813069104	0	11.450904	10.8095317	9.16601772	18.3031016	0	4.318680833	2.487723266	0
TCONS_00456667	NONMMUT115959.1	0	12.8953372	0.150867954	0.055684115	1.349114633	0.136537061	0.173956544	0	0.076407163	0	0	0.074607045	0.107696956	0.05568334	0	0.05170384	2.67701816	0.694174571	0	0.015080012	0	0	10.94048015	0.083729913	0	0	0	0.326492789	0.267111874	0	0	0	0	0	0	0.97884029	0	0	0	0	1.164375765	0	0	0	0	0	1.214404361	8.188712631
TCONS_00456666	NONMMUT115959.1	0	2.375504776	0.491626854	0.105143648	0.646372688	0.971072633	0.789762922	0.329255455	0.34312701	0.221047065	0.1562194	0.576293144	0.22151396	0.741991829	0	0.050755725	0	0	0	0.047119335	0.048253939	0	0	0	0	0	0	0	0	0.297847728	0	0	0.174786113	0.275704345	0.345918815	0.193330757	0	1.153243329	0.649034557	0.099345194	0	0	0	0	0	0	0	0
TCONS_00456664	NONMMUT115959.1	13.23888669	0	4.542270374	3.175595832	5.097592165	9.373290389	7.74019052	5.052061807	6.082224145	3.727490551	3.159022604	3.725885476	2.893219767	5.565582958	10.08516578	1.507122684	0	0	0	1.11416016	0.896961812	0.37187961	0	1.66524596	0	0.237673708	0	0	0	0.943813403	0	0	4.530893099	7.593202605	1.651677666	0	0.473707788	0	3.996869736	1.512211357	0	0	0.492961836	0	0	0	0	0
TCONS_00456663	NONMMUT115959.1	4.300541253	0	16.47684464	5.928618462	8.285929482	13.76410301	16.67402896	14.34953643	18.57477092	12.28946174	19.11913957	19.91549348	12.13865237	13.88508842	17.89332442	5.577504308	0	0.606086543	1.680460217	1.140931058	2.893013095	2.014188144	0	3.256644471	1.923762135	0	0	0.501449979	0	2.944097837	0	0	8.396744537	8.852105537	0	0	2.814707565	0	0	4.031469761	0	0	0	0	0	0	0	0
TCONS_00667487	NONMMUT150550.1	0.83701331	0	1.140690957	1.22334087	0.794986097	1.327380774	1.542452449	2.638312294	2.280104514	2.535075369	2.132461954	2.801365761	2.137089111	3.08786584	1.987864233	2.557222612	11.33449489	35.46063362	41.83575471	13.50223465	15.16204321	30.30795631	59.00208849	26.50805295	22.92520539	60.82493451	25.89485393	37.37456253	37.29830015	17.16226409	29.40743593	22.81712259	18.81556434	18.56203072	22.06689659	24.65537813	26.67675811	22.68772141	26.57454301	15.81294526	26.21996627	66.44159648	30.99912463	18.70504059	24.01154201	30.36245718	15.01888925	0
TCONS_00356081	NONMMUT056424.2	0	0	0	0	0	0	0	0	0	0	0	0	0	0	0	0	0	0.094453826	0.476495742	2.715122801	2.725527928	9.666829276	6.090388598	0.585460092	10.92028478	0	0	0.4047347	0	5.174741613	0	0	21.33528584	0.391290184	5.691114905	3.332408928	3.436818934	0	0	0.012752862	0	0	0	1.805997934	0.295791105	0.02890306	0	0
TCONS_00356084	NONMMUT056424.2	0	0	0	0	0	0	0	0	0	0	0	0.217664242	0	0	0	0	0	0	3.753598448	0	0.431982585	0	7.837458284	2.514869876	0	0	0	0	0	0	0	0	0	0	2.089174481	0	0	0	0	0.814466908	0	0	0	0	0	0	0	0
TCONS_00356085	NONMMUT038240.2	0	0	0	0	0	0	0	0	0	0	0	0	0	0	0	0	0	0	0	0	0	0	0	0	0	0	0	1.477689509	0	0	10.08666386	13.52475504	0	0	0	2.03546621	4.187765684	4.399386791	0	2.388066809	0	5.469907892	1.863626175	12.42713043	12.82632225	4.088963768	5.897968982	0
TCONS_00356088	NONMMUT136346.1	0	0	0.97187282	1.093949048	0.903001148	0.646318149	0.608643399	0	1.417934067	1.914473902	0	0	0	2.984978768	0	2.24837434	0	4.185209265	0	0	0	0	0	0	0	0	10.53440764	0	0	0	2.29056285	12.02388236	0	0.717142703	5.560125205	4.681537617	3.481736846	7.159067194	3.305103144	0	24.11158317	0	11.83615909	6.25819755	0	7.224716408	0	0
TCONS_00753527	NONMMUT090143.1	0.90344555	0	0.139487066	0	0.810171444	0.328327111	0	0.108392173	0	0.06702666	0	0	0.092304107	0.099126097	0	0.036391792	0	1.528073181	2.203966876	0.496299331	0.583420713	1.265976758	2.619041622	0.971972287	3.980502904	3.453187355	0.792363458	6.875361745	0.747379025	2.097620168	3.390286573	0	0.299050674	0.250179316	0.380171991	0.596365387	0.293215097	0.571587899	0.770372436	0.51944275	1.956426432	0	0.649772805	0.481657306	0.22218136	1.120315819	0.356744558	0
TCONS_00458273	NONMMUT147405.1	1.941565873	0.662207757	4.61195008	5.947328325	1.219941591	10.76831926	2.067227126	2.226276586	3.634860412	1.859650827	2.077124925	3.31592902	1.006045879	2.896735125	3.738216289	4.446008756	0	0.445313629	1.102451627	0.314253576	0.207191303	0.258921333	0	1.56016063	0.927465281	0	1.348539802	0	0	0.217464681	0.715422856	1.285937427	0.470561967	0.09386404	1.289631373	0.479993604	0.035133812	0	0.036120001	0.270924824	0	8.601279638	0	0.513271878	0.432680351	0.087386425	0.035476186	0
TCONS_00624902	NONMMUT150254.1	41.84232719	5.039069927	0	0	23.47451654	0	0	0	0	0	15.34626201	0	0	0	0	0	0	0	0	0	0	0	0	0	0	0	20.02639401	0	0	25.9295154	26.83554278	89.8982322	0	0	0	21.60096549	12.64711189	72.24162296	66.84767535	0	282.5627313	78.69639613	74.6502163	67.00032893	69.60312471	13.29385657	35.32606692	54.47783207
TCONS_00296564	NONMMUT111964.1	0.080091718	0	0.095652482	0.069903129	0	0	0.065515556	0.119775249	0.072127194	0.192572034	0	0.093620976	0.060167229	0.078214373	0.153158514	0.057187101	0	0.428073797	0.532486272	0.20420507	0.18710264	0.496292941	3.404793181	0.356221457	0.359733022	0	1.278415732	0.42938585	0.221969968	0.523523275	0.20424754	0	0.282133248	0.286322757	0.376076349	0.283756219	0.658613586	0.849513687	0.379664465	0.240166986	1.267681284	0.329378414	0.390398616	0	1.004629691	0.431776328	0.515466854	0.343956007
TCONS_00840884	NONMMUT061375.2	0	0	0	0.012509361	0	0	0	0	0	0	0	0	0	0	0	0	0	0	0	0	0	0	0	0	0	0	0.321915716	0	0	0	0.52182077	0	0	0	0	0	0	0.304101366	0	0	0.748652344	0.501909965	0	0.227748899	0.387681595	0	0	0
TCONS_00381580	NONMMUT059503.2	0	0	0	0	0	0	0	0	0	0	0	0	0	0	0	0	7.752644593	0	0	0	0	0	0	0	0	9.101804196	0	0	5.968347724	0	2.54886026	3.334435749	0	0	0	0	0.951247111	0	0	0	0	0	0	1.445591811	2.24847753	0	0.95980431	0
TCONS_00377375	NONMMUT011099.2	0.358492724	0	0	0.351562411	0.078073763	0.105228853	0	0.209322108	0.363748676	0	0	0.08195105	0.241702171	0.361906889	0.935637613	0.144034382	0	0	0	0	0	0	0	0	0	0	0	0	0	0	0	0	0	0	0	0	0	0	0	0	0	0	0	0	0	0	0	0
TCONS_00377374	NONMMUT011099.2	0	0	0	0	0	0	0	0	0	0	0	0	0	0	0	0	0	6.856777969	8.597619682	0	0	0	0	0	0	8.60814288	0	2.36426123	0	0	0	0	0	0	0.168644103	0	0	0	10.80680872	0	3.576296991	0	27.2593905	13.91909028	0	12.24576564	0	0
TCONS_00481136	NONMMUT075201.1	11.13916711	0	0	0	4.433613844	0	0	0	0	0	0	0	0	0	0	0	0	8.010625739	0	0	0	0	0	0	7.629585029	19.09000109	53.98358947	9.385790501	9.565409782	8.148857464	39.95083813	18.69844872	1.587543774	0	14.3730692	8.751403385	14.04541709	18.1070881	15.85358523	0	21.27893583	50.15557944	12.73837938	0	21.57106257	12.69587127	15.09518783	0
TCONS_00471197	NONMMUT043532.2	107.6437078	94.19905343	52.24637567	57.37839267	73.16374353	57.91357244	35.9212556	14.9284923	26.76453904	21.22030556	24.19201768	28.50952887	13.43231403	14.77774565	31.59106991	26.36045685	17.40061804	9.195916375	20.46590748	11.63718935	17.73285459	11.1770414	31.90088814	24.34860631	12.14458408	26.65689708	8.861832985	11.00607882	4.941569678	9.177984226	13.4520304	14.32901705	16.36785914	29.48456494	20.18093117	15.66075132	10.126201	15.95384474	18.85664498	23.4231542	14.50779685	13.40787708	4.834976276	3.347425291	18.55382023	9.088210082	10.41020699	20.80085949
TCONS_00813385	NONMMUT067865.2	0	0	0	0	0	0.156159236	0.030581617	0	0.094110668	0	0.167913474	0.020140683	0	0	0	0	11.78824947	6.290023706	8.833586635	3.482383395	1.434995551	5.306735635	2.544412806	6.407917682	10.97949087	24.60818228	53.29930184	6.795230512	36.8325906	7.170266399	14.89724747	19.08900629	0.600133226	2.119530331	3.589936933	3.373448381	9.245289929	7.495849312	6.518974271	1.602148832	22.71245624	57.93543687	13.8745988	16.91776344	4.338161372	11.33386644	2.887237517	0
TCONS_00813384	NONMMUT133769.1	0	0	0.010271276	0.067374769	0	0.058184724	0	0	0	0	0	0	0	0	0	0	0	0	0	0	0.347008932	0	0	1.845930061	0	0	0	0	0	1.529553422	5.473601801	0	0	0.727701556	0	0	0	0	0.000105511	0.801666371	0	0	0.723600492	0	0	0	0	0
TCONS_00813383	NONMMUT133769.1	0	0	0	0	0	0	0	0	0	0	0	0	0	0	0	0	19.07776992	6.661149705	4.983661425	3.371810327	0.750401506	7.564911802	0	2.903413368	31.22640262	10.31784707	58.13246849	12.43596549	83.04214355	0	0	22.60659627	0.666813042	1.757730063	1.196919632	1.721683725	2.874130576	2.588253596	2.462947922	0.103906031	1.86675324	93.67704249	2.107501007	8.278926618	3.493407071	1.99271635	1.251473789	0
TCONS_00813382	NONMMUT067860.2	0	0	0	0	0	0	0	0	0	0	0	0	0	0	0	0	0	0.22010006	0.203457871	0.112931315	0.071455117	0.257452736	0	0.228357016	0.741828612	2.084732142	1.141827915	0.520313208	1.737429188	0.115293448	0.083324867	0.708551522	0	0.021738816	0.143021536	0.17031773	0	0.134192433	0	0.028207265	0	4.110399752	0.318628366	0.213491346	0.34484624	0.396144513	0	0
TCONS_00813381	NONMMUT067862.2	0	0	0	0	0	0	0	0	0	0	0	0	0.035951973	0	0	0	9.455228143	0.07345713	0	0	0.028722741	0	0	0	0.305091763	4.666584892	5.415543197	0.22899779	0	0.055067792	0	0	0.118317784	0	0.1925944	0	0	0.142989906	0	0	0	3.222697097	0.176905267	0	0	0.378142909	0	0
TCONS_00813380	NONMMUT067853.2	0	0	0	0	0	0	0	0	0	0	0	0	0	0	0	0	0	2.619901386	3.411076617	1.491484311	0.702970493	2.023478951	0.613701533	3.032844468	3.721486922	1.425431787	6.390922771	2.679118197	9.617229485	0.852413005	1.59493086	4.51878412	0.747157791	0.733104354	0.921477045	0.943507427	1.547461405	0.731336371	0.435304037	0.067681545	2.5657539	15.12661514	1.0950364	3.873714934	2.313000988	1.133030544	1.268893233	0
TCONS_00724229	NONMMUT074149.2	0.350648124	0	0.097420006	0.325532344	0	0.023903872	0.132457416	0	0	0	0	0	0	0.397775457	0	0.127995447	0	1.106479975	1.584229494	2.09326618	1.429195256	1.196318896	0.287184185	3.758976294	0.308511115	1.013572552	0.779648654	0.31665632	1.020500917	3.033108929	2.994033765	0	7.115686769	11.57915708	4.459729521	1.511019865	1.353729391	0.54832416	0.866774501	5.645815255	0.640094003	0	0.215722239	0.363753548	3.062187016	0.92107477	4.690397858	11.61611425
TCONS_00269405	NONMMUT031762.2	0	0	0	0	0	0	0	0	0	0	0	0	0	0	0	0	0	0	0	0	0	0.423837016	0	0	0	0	0	0	0	0	0	0	0	0	0	0	0	0	0.594872141	0	0	0	0	0	0	0	0.84987062	0
TCONS_00269404	NONMMUT134697.1	32.52217465	18.39828366	57.51568739	66.61682676	40.42909309	54.20915411	50.24025882	51.98084531	60.04309267	41.07543146	42.16575347	41.08341147	30.37361478	40.77443074	27.26812075	25.49885787	8.031054481	5.227624271	7.33665627	8.852733162	4.813348632	9.424572652	4.297994605	4.619090278	4.481677459	10.98874623	16.37512617	9.108150174	7.479132486	26.70408637	23.25271867	54.64425763	28.18483388	15.05427915	20.09381728	38.7207107	47.41576511	27.73028399	20.82660941	20.03219595	25.1387602	16.19064402	20.40630884	28.18978419	38.0296282	15.1689071	29.14085413	51.95111524
TCONS_00481626	NONMMUT038240.2	0	0	0	0	0	0	0	0	0	0	0	0	0	0.09788985	0	0	0	0.844501316	0.435415211	1.240616047	1.324902773	1.144052311	0	1.274772439	2.352258344	0	0	0	5.621636511	0	0	0	1.267876615	0.682530764	0.265068848	0	0.778896433	1.465026995	0	0.2718942	0	0	0	0	0	0.62269382	0	0
TCONS_00481625	NONMMUT115364.1	0	0	0	0	0	0	0	0	0	0	0	0	0	0	0	0	0	0.090352583	0.036998888	0	0	0.166013266	0.68846059	0	0	0	0	0	0	0.061666824	0.252732741	0	0	0	0.171875267	0.072959028	0	0	0.470193074	0.092893279	0.308040549	2.003592198	0.726583775	0.52752943	0.108548683	0.248789153	0	0
TCONS_00830011	NONMMUT136346.1	0	0	0	0	0	0	0	0	0	0	0	0	0	0	0	0.335032033	0	82.89339141	21.96120519	0	0	29.16481607	157.8667745	8.75472013	29.77502409	74.02254042	110.9480298	47.63405937	61.91172449	10.80037921	9.830495543	0	0	0	0.790813295	0	17.47340981	45.94501722	26.53283092	0	75.29058804	76.94907147	20.68920639	0	0	28.27274189	17.98369994	0
TCONS_00343700	NONMMUT059503.2	5.306240887	12.49453596	3.471681365	0	3.015950446	0.897424709	0	0	0	0	0	0	0	0	0	0	0	2.335131084	6.350723531	0.38724065	0	1.689659185	5.426804279	0.652212895	5.911035358	31.79882939	3.523156557	6.039981647	5.143239143	8.275471667	27.3258143	8.592817595	2.42136523	0.546499376	7.311657186	6.229116995	6.999360127	12.76188008	13.77677313	2.218123995	28.02105922	28.82212913	13.05104117	11.26867332	12.31148671	10.31795555	9.369111942	0
TCONS_00367396	NONMMUT059503.2	0	0	0	0	0	0	0	0	0	0	0.072122782	0.024768412	0	0	0	0	5.913533117	15.79145662	21.05323182	0	0	2.795713488	16.23248369	6.203358403	9.814346371	21.53795889	3.318178507	0	0	10.384204	0	0	0	0	0	0	4.083527392	0	20.50413202	0	4.593718779	0	0	0	0	2.708039781	4.357835171	0
TCONS_00367397	NONMMUT059503.2	0	0	0	0	0	0	0	0	0	0	0	0	0	0	0	0	21.97965761	0	0	0	0	0	0	0	0	13.595221	13.19584726	0	3.301636325	0	0	0	0	0	0	0	0	0	0	0	0	15.08183789	0	18.1003964	0	0	0	0
TCONS_00367395	NONMMUT059503.2	62.78817658	22.18528427	55.12327554	46.86521978	67.27635718	66.50178495	19.54086679	34.96634121	80.32172872	33.93290466	111.8079928	55.79375574	43.15858136	106.0757884	28.98829619	76.87561395	0	31.81043311	47.41711265	29.53838565	33.76144456	43.30004414	93.12894711	49.43355454	60.31093968	66.34128431	20.76866884	45.59764045	39.36668095	49.18052508	69.3690163	48.39166244	20.53164483	45.99442588	47.59639674	47.35280901	41.26957163	34.31767035	5.492877859	48.69537012	22.83452184	24.86933518	45.61268612	49.1452864	47.71085106	43.79145686	28.15509768	14.44711216
TCONS_00275973	NONMMUT074767.2	0	0	0	0	0	0	0	0	0	0	0	0	0	0	0	0	0	0	0.26811589	0	0	0	0.64808549	0.062469806	0.036518689	0	0	0	0	0.211282828	1.117820994	1.196840334	0.223379987	0	0.377663587	0.204450609	0.28904146	0.63874607	0	0.050733349	1.120727307	0	0	0.697132312	0.795536911	0.361889034	0.800373906	0
TCONS_00644515	NONMMUT039131.2	0	10.73173891	5.337469396	0	136.8621363	37.74275452	121.9062965	57.75740824	1.288075936	32.59170678	12.9559709	1.014136699	170.5621724	65.64855152	19.87566259	10.96802465	5.550797156	0	0	0	0	0	0	0	0	0	0	0	0	0	0	0	0	0	0	0	0	0	0	0	0	0	0	0	0	0	0	0
TCONS_00827627	NONMMUT072085.2	14.64855579	12.11062101	13.15032605	0.044583411	10.60245612	27.15774374	29.57123869	0	1.385104765	0.750879386	0	2.412576137	1.125638513	0.375192189	0	0	0	0	0	0.21931245	1.450179846	0	0	4.305972808	1.930891486	0.229737686	0	0	0	0	0.171778907	0	0.018286897	1.767846483	0	0	0	0	0	0.436036647	0	0	0	0	0	0	0	0
TCONS_00848997	NONMMUT139949.1	0.921713045	1.30272821	0	0.049736449	0.162393428	0.33436785	0.052668341	0	0	0	0	0	0	0	0	0	0	0.01934785	0	0	0	0	0	0	0.028038694	0.906131013	0	0	0	0.109016782	0.430753755	1.844217976	0.044634318	0.026205696	0.093788796	0.095945388	0	0.102193176	0.067808531	0.057320341	0.675488024	0.4943206	0	0.651756102	0.349173043	0.132718133	0	0
TCONS_00007328	NONMMUT095568.1	12.61055071	22.83590339	11.10156006	18.36341704	6.982214742	10.63699114	13.6184262	10.70704717	9.090652823	9.720008956	8.293168712	18.7309155	7.765520122	11.79069486	8.576551708	14.41246113	0	0.010435734	0.024513864	0.256843707	0.217165952	0.030917826	0.390726782	1.817491913	0.194680857	0.406975528	0.192648543	0.449838508	0	0	0.145165273	0	0	0.280775318	0.184233053	0	0.034210138	0.15488508	0.0351704	0.309882633	0	0	0.034290612	0.123978714	0.27042522	0.131079638	0	0
TCONS_00007329	NONMMUT095568.1	0.61006849	1.665783613	0.349341208	1.093756411	0.317799254	0.503740349	0.875330622	1.107636473	0.782601944	0.59587525	1.170806213	0.720839263	0.602652559	0.505102571	0.904485811	0.476664525	0	0	0.023505459	0.016849838	0.035027409	0	0	0.074788635	0.09844317	0	0	0	0	0	0	0	0	0	0	0	0	0	0	0	0	0	0	0	0	0	0	0
TCONS_00840306	NONMMUT073175.2	0.713145434	0	0.373143859	0.746468132	0.546516344	0.327263504	0.220028233	0.416841896	0.426245941	0.398809956	0.339128146	0.402169798	0.423899457	0.345487442	0	0.137492393	0	0.313072012	1.368550705	0.869600322	1.980150246	0.711109995	2.214118433	0.557778468	0.786451167	0.284272406	0.682746437	1.470462104	0.934891561	2.001877303	0.96776849	2.388169508	2.939895878	3.011306773	2.630224443	1.866641793	1.094724432	1.457902282	0.562726396	1.53170218	0.500268857	3.54170338	0.282280317	0	4.831200632	0.284005882	1.876484873	0
TCONS_00451056	NONMMUT029054.2	0	0	0.01963915	0.722388515	0.078073763	0.20453969	0.031462569	0.094858961	0.389088034	0.319047965	0.727382594	0.503014056	0.13246858	0.3308266	0.216708191	0.268632419	0	0	0.072028984	0	0.026545971	0	0	0	0	0	0	0	0	0	0.193553698	0	0.193512134	0.068066744	0	0	0	0	0	0	0	0	0	0	0	0	0.035405375	0
TCONS_00305443	NONMMUT040182.2	4.508340861	3.537348286	2.841883268	13.33955408	3.672433687	2.522288008	2.896129484	4.542922142	12.80761081	7.246536432	6.416018048	11.5001488	8.408814041	12.40949731	3.338118792	6.198787886	9.369563562	6.377203826	4.326757087	12.83292571	18.40133523	7.709823651	5.995181505	4.485894429	5.807531546	10.92159527	9.054481528	9.683853497	8.412154263	14.97024741	19.82889892	25.96711818	16.40895814	10.97475843	14.71835028	22.4082614	28.73764527	21.87915934	14.1118767	10.73021058	21.90902446	12.32335691	11.51711923	10.1306727	27.38947751	13.68263878	20.94135875	49.55686148
TCONS_00305444	NONMMUT008245.2	11.6278363	7.554631643	7.792314106	12.10593121	10.79100426	8.666633031	8.752981106	5.251107528	4.636908008	5.265514442	4.605115152	4.897948468	4.254784821	5.936073927	2.30740046	5.561560184	0	2.268029316	0.447059897	2.862839407	6.923083035	2.903508488	4.042068563	1.973812372	2.636868182	0	0	3.970634542	0.718397386	2.86371479	3.531919492	11.17057102	7.352843331	3.170812678	5.710190112	5.522753074	6.196448176	6.120655663	3.292547311	3.495261566	5.477568782	1.284120454	4.78981554	3.760894304	5.141756954	4.607667742	4.441958342	0
TCONS_00848994	NONMMUT023055.2	0	0	0	0.007861995	0	0	0	0	0	0	0	0	0	0	0	0	0	0	0	0	0	0.012707226	0	0	0	0	0	0	0	0.088233621	1.732112043	0	0.189760975	0.195002712	0.112778972	0.349808672	0.332317285	0.193885143	0.077691413	0	0	0.708087697	0.128041145	0	0.36285656	0.176979358	0.283420027	0
TCONS_00672092	NONMMUT149630.1	1.937835573	0	3.352520819	0	0	4.421739024	0	0	0	0	0	0	0	0	0	0	0	0	0	0	0	0	0	0	0	0	0	0	0	0	0	0	0	0	0.027025572	0	0	0	0	0.017591799	0	0	0	0.47161503	0.091295554	0	0.166546884	0
TCONS_00815269	NONMMUT022630.2	0	0	0	0	5.444473896	0	15.78179245	0	0	2.451245516	0	0	8.194108966	0.000121883	0.516469795	0	0	0	0	0	0	0	0	0	0	0	0	0	0	0	0	0	0	0	0	0	0	0	0	0	0	0	0	0	0	0	0	0
TCONS_00333364	NONMMUT071391.2	0	0	0	0	0	0	0	0	0	0	0	0	0	0	0	0	0	0	0	0	0	0	0	0	0	0	0	0	0	0.037925476	0	0	0	0	0	0	0	0.092931048	0	0	0	0	0.034290612	0	0	0	0	0
TCONS_00333365	NONMMUT071391.2	0.438858729	0.496655818	1.148890302	2.757116165	0.89784828	0.436351339	1.218975289	2.782529535	7.386058147	3.13730499	5.931301478	12.76577241	6.62342901	12.98929705	0.216708191	5.92919155	0	0	0.768309168	0.20070191	0.458296279	0.556520866	0	0.63738622	0.478709406	1.424414348	0	0.359870806	0	0	0.774214792	1.653348121	0.692178017	0.570075995	0.453510918	1.919974416	0.307891246	0	0.668237595	1.056779235	0	0	0	0	0.054085044	0.24031267	0.106216125	0
TCONS_00474911	NONMMUT150550.1	1.640728214	0	4.115315243	4.399466454	2.102643561	2.529719617	3.725472317	5.456350701	4.787825529	4.424131783	3.316864627	7.710481141	5.745559729	8.382275458	5.713511447	5.538347182	0	0	0	0	0	0	0	0.029855885	0	0	0	0	0	0	0	0	0	0	0	0	0	0	0	0	0	0	0	0	0	0	0	0
TCONS_00848995	NONMMUT044096.2	0.187666964	0	0	0.038009676	0	0.083520374	0.171397589	0.189559825	0	0	0	0.194807284	0.068433269	0.141175899	0.08717087	0.106331032	0	0	0	0	0	0	0	0	0	0	0	0	0	0.024177491	0	0	0	0.046634228	0.161359811	0	0	0.069388516	0	0.154003723	0	0	0	0.32308853	0	0	0	0.735905875
TCONS_00401796	NONMMUT017298.2	20.02797637	8.109892848	15.42481463	15.79496468	38.38168672	21.99607557	63.50769909	33.24689606	12.9487525	18.1347661	16.97487163	6.817450107	68.16139002	30.26011713	22.93514883	24.16517692	0	0.424963949	0.028091304	2.886234864	1.829627955	0.136069352	0	0.54761603	0.324718848	0	0	0	0.192721217	1.770702563	0.113422467	0	0.227123703	0.826993919	0.294631168	0	1.695762355	0.360603443	0.766046476	1.070501474	0	0	2.810732875	0	1.275108995	1.795485188	0.764331235	0.351315065
TCONS_00830273	NONMMUT139470.1	0	0	0	0	0	0	0	0	0	0	0	0	0	0	0	0	49.97859055	45.40429118	54.36363593	2.972395281	0	69.56266573	0	22.12969213	32.17431563	0	19.3723522	33.47002426	13.05362375	34.52811213	4.940990413	18.25498401	14.20307611	16.34998067	33.50813767	65.55275315	28.22244059	2.020166099	40.17623789	42.70019795	20.01388096	0	44.76275901	49.9904493	24.01776179	51.62178304	0	0
TCONS_00848992	NONMMUT013641.2	0	0	0	0	0	0	0	0	0	0	0	0	0	0	0	0	0	0	0	0	0	0	0	0	0	0	0	0	0	0.067905565	0	0	0.066389547	0	0.053753536	0	0	0	0	0	0	0	0	0	0	0	0	0.475779146
TCONS_00381813	NONMMUT105083.1	36.50119703	10.39003971	12.78540118	18.23693886	12.87127968	12.07141435	8.386840702	6.988006732	12.37805762	7.093499758	8.574218156	11.18572477	6.285475169	9.311602202	6.322244754	27.18244045	0	0.459193155	1.111503269	2.127011469	1.158698449	2.2852911	3.054050773	0.262305278	1.28853185	0	0.770594173	1.226199794	1.658364073	3.595126563	5.51265126	11.80857969	3.358752891	1.951839399	4.692486726	6.792176159	3.964202429	4.595378372	5.541588862	4.895843664	7.266155013	2.121480325	2.030758617	0.619893572	12.61100969	3.699067385	6.965865901	0.972675591
TCONS_00367773	NONMMUT034679.2	14.04347931	22.85643184	13.25533659	8.217807467	17.21526485	11.84568435	8.309568632	1.264786152	3.112704271	1.728176478	3.357150432	1.79073004	1.775078975	1.723780707	0.92100981	0.979718235	0	0.302636278	1.368550705	0.684211055	1.652486691	0.26280152	0.390726782	1.435608214	1.162579986	1.627902112	0	0.449838508	0.133555937	0.30340381	0.774214792	0.734821387	0.647521371	2.059427396	1.913189399	0.826655651	0.613627254	1.022241528	0.808919194	0.961430733	1.091336512	0.505957626	0.411487343	0	2.650167151	0.633551584	0.601891374	0
TCONS_00474501	NONMMUT056424.2	0	0	0.073489701	0.064232379	0	0.195512672	0.187558862	0.111048224	0.407910168	0.153408897	0.084376381	0.085049617	0	0.063640591	0	0.215032351	0	0	0	0	0	0	0	0	0	0	0	0	0	0	0	0	0	0	0	0	0	0	0	0	0	0	0	0	0	0	0	0
TCONS_00379939	NONMMUT056424.2	0	0	0	0	0.039271103	0	0	0	0	0.031266701	0	0	0.063399462	0	0	0.046552418	0	3.343379498	6.684745942	2.655861001	2.055082886	8.575955626	2.502344556	5.820569259	1.57857846	0.749241947	0	2.889072823	7.090351152	0.308846116	1.820614471	4.746395044	1.369552355	0.403567723	0.676716348	1.632591579	4.366000506	1.376061005	0	0.265188022	0	3.231804334	3.128058198	1.468651852	0.663623489	0.971103498	0.782777435	0
TCONS_00709103	NONMMUT152735.1	2.822081054	0	0.529117992	10.06336565	0	0.149995773	0.136337799	0.126478615	0	0	0	0.217624001	0	0.069647705	0	0.15801907	0	4.606906829	4.964453696	11.41057865	14.41495332	6.665574082	4.056395211	2.667628121	5.757985123	0.922003059	11.38206123	9.800601584	6.381970461	17.24822218	15.36487321	27.26481275	18.95974577	12.14658698	13.0778258	25.90696145	29.31730186	21.39975904	12.80177931	9.563915647	10.01650812	6.324470322	6.727269402	5.61202049	26.0247496	7.98329612	13.26873075	19.10475643
TCONS_00174820	NONMMUT088800.1	0	0	0	0	0	0	0	0	0	0	0	0	0	0	0	0	3.152188884	4.267787226	8.143548964	4.958860677	6.02321444	7.350713104	8.149388498	15.20782075	6.426297647	0	0	9.137839516	0	0.717872378	0.791489459	1.73785258	0.883799686	2.601042984	0.642789123	3.121478405	0.149737776	1.42491176	0.978757054	0.64504851	0	2.998557869	1.349952809	1.468651852	0	2.650736133	0	0
TCONS_00174821	NONMMUT088800.1	0	0	0	0	0	0	0	0	0	0	0	0	0	0	0	0	0	0.334371344	0	0.117948863	0	0	0	0.151090318	0	1.619559114	4.248093025	0	6.28634441	0	0	0	0	0.069964104	0	0	0	0	0	0	0	0	0	0	0	0	0	0
TCONS_00723937	NONMMUT049317.2	1.338903124	1.916594801	0.528617194	0.585158777	0.985720301	1.179498578	0.915539785	1.077218366	0.587814747	0.775100444	1.468921171	0.437642349	0.741161706	0.622702722	0.272022956	0.894040295	0	1.607739573	2.180653495	2.867788533	2.986946013	1.983548578	1.06407927	0.721574812	1.459978205	2.127871548	0.884449462	1.03144971	1.236995091	1.911311266	4.202583055	2.343712814	1.516279209	1.219390188	2.093879509	2.892548123	2.554573672	1.521405165	2.060493038	0.981215547	2.252460529	0.572238075	1.992490294	1.15052247	2.475851055	2.368456133	2.48386408	15.30876195
TCONS_00848990	NONMMUT013641.2	0	0	0	0	0	0	0	0	0	0	0	0	0	0	0	0	0	0	0	0	0	0	0	0	0	0	0	0	0	0	0	0	0	0	0	0	0	0	0	0	0	0	0	0	0	0	0	0
TCONS_00723938	NONMMUT062665.2	12.21437099	29.69488579	15.57748938	14.4500699	14.22800651	19.09057563	15.16252519	6.015860475	10.39156866	8.42475398	12.58914626	9.678392853	5.804137336	9.647652381	9.129211771	7.88191221	6.036675952	4.260930949	6.661072416	6.271131867	4.914515327	7.410183542	6.916385016	3.806976838	4.841239513	7.07567653	6.219658216	4.281382984	5.286544664	7.339470912	9.391128648	8.901075167	6.422570962	6.394972667	7.519344524	9.320489135	8.964527323	8.345548861	5.279393532	4.3802228	4.280425408	4.693262936	5.811778646	4.932493156	5.944433091	7.187315018	6.995995875	8.017534525
TCONS_00012264	NONMMUT057411.2	11.9917599	5.167538231	6.894186297	4.067504852	6.949736056	8.029791888	4.603770908	3.839637802	10.87530236	9.303996997	14.32826209	6.629624658	9.406911805	14.39619811	2.039874199	5.232517074	23.34627538	29.43782731	38.0956737	14.33293073	17.81908917	24.66395357	73.83837514	32.35825769	34.48658464	42.83498827	34.86187302	33.16884239	19.46364096	24.29335347	25.56612086	17.23192894	8.194390387	18.73607738	18.14786274	21.14654488	18.16941508	18.08221356	19.8265391	17.12935846	16.13879839	24.2040009	12.72377157	15.6220619	13.47896647	22.9083951	14.15393594	40.50553918
TCONS_00628421	NONMMUT002187.2	0	0	0.073656634	0.176238718	0.12105337	0.111419587	0.067738911	0	0.078644419	0.0528822	0	0.023923349	0	0.082724062	0.074385086	0.070065656	0	6.363574758	6.842249321	1.441267781	0.723503801	3.001517996	3.36155275	3.75142297	1.581861039	0	2.391731663	3.650499471	7.228982215	2.984109214	10.69485797	5.720768204	1.916447416	2.412506612	3.108635167	5.495553437	4.238396689	4.351062646	1.844124739	0.934502727	5.474317035	1.663335695	7.84853812	2.357579235	12.29520712	3.130596841	6.155436868	8.714085434
TCONS_00648877	NONMMUT060196.2	0	0	0.05340867	0.306774323	0	0	0.035751966	0.46948862	0.409028796	0.229741122	0.580563215	0.958805153	1.242290345	2.249202997	0	0.451270861	0	0	0	0.125999747	0.131429102	0	0	0	0	0	0	0	0	0	0	0	0.142811955	0	0	0	0	0	0	0.36900665	0	0	0	0	0	0.029187066	0	0
TCONS_00823386	NONMMUT072081.2	0	0.724620838	0.188221618	0.320523784	0.959604627	0.415433747	0.144119541	0.93897724	0.901176522	0	0.662086018	0	0.813886957	0.856440421	2.255227963	0.177028764	8.13545819	0	0	0	0.097231255	0	0	0.072310573	0	0	0	0	0	0	0	0	0	0.207561026	0	0	0	0	0	0	0	0	0	0	0	0	0	0
TCONS_00838913	NONMMUT136598.1	0.49185092	0	0.072527383	0.044836247	0	0.177267732	0.016287123	0	0	0.109167579	0.105694286	0	0	0.06109845	0	0.05642861	0	0.208745982	0.264106276	0.016562469	0	0	0	0.009328475	0	4.06975528	0	0	0	0.029202617	1.457120627	0	0	0.029498425	0	0	0	0	0.215700062	0.027555717	0	0	0.187946844	0	0	0.611704977	0.055692655	0
TCONS_00436684	NONMMUT037038.2	0	0	0	0.149618701	0	0	0.06266295	0	0	0	0	0	0.232217421	0.068289575	0	0	1.962254312	0.769311854	0.536399847	2.226098914	3.054863879	1.908170919	2.543110384	0.77785542	0	0	0	0.525981173	0.288881492	0	1.079497362	0	1.95887123	2.098752957	1.193518406	0.850175338	0.893089876	1.18084385	0.437343921	1.062889485	0.740648043	0.43259377	1.033793367	0.577864788	1.726124176	0.901653137	0.932152712	33.67185324
TCONS_00450058	NONMMUT041684.2	0.155136561	0	0.073843206	0.068687108	0	0.102788012	0.094345757	0.126668333	0.289676041	0.133707685	0.511070201	0.296516726	0.133051442	0.216238713	0.054231225	0.214352869	0	0.106100105	0	0	0.017845529	0.123624927	0	0	0.045101265	0	0	0	0	0.133459751	0	1.323964434	0	0	0	0.294769405	0.159008724	0.137940652	0.071079378	0.063796094	0	0.255255622	0.115182165	0	0	0.166077901	0	0
TCONS_00268298	NONMMUT118584.1	0	0	0.500768878	0	0.117110645	0.504394876	0.10487523	0	0	0.02658733	0	0.040241124	0	0.308365215	0.086683276	0.046584022	0	0.927173198	1.793953887	0.086821822	0.238913738	0.514209821	0	0.466632238	2.565284029	8.342998324	0.192648543	0.569795443	0.133555937	1.036484304	1.251663376	4.960044363	1.486649525	1.814429661	2.477892051	2.042852778	4.356147986	1.186017012	1.720078739	0.11123992	0	0.758936439	1.849292699	2.573922092	2.053663202	0.981218477	1.889159997	1.59979538
TCONS_00075661	NONMMUT150550.1	0	0	0.021593246	0.061595661	0.041222947	0.015026849	0.049794759	0	0.052867337	0.0705096	0	0.07766537	0.064353236	0.103757669	0.072976483	0.017777145	1.422835152	0.322725065	0.318872314	0.288308293	0.364257177	0.680393135	0.142745518	0.81247681	0.448841358	0	0	0.360980408	0.943172029	0.020745236	0.053324044	0.201157355	0.273395431	0.404912041	0.064963409	0.060745857	0.077109652	0.215042445	0.079274081	0.27183858	0	0.871764989	0.037273895	0	0	0.074824627	0	0
TCONS_00477176	NONMMUT122446.1	0	0	0.045926153	0.069987407	0	0	0.094230394	0.080977933	0.150333889	0	0.183971844	0.032756275	0.04064136	0.139608825	0	0.024571965	2.130906456	1.120985645	1.65402558	1.804036483	2.849159151	3.395673899	2.079447935	4.257412318	1.034251672	0	0	1.400527211	0	0.306475774	0	0	1.807656383	2.301098369	0.742912701	0.391274786	0	0	0.223754083	0.606376747	0.209487584	0	0	0	0	0.548131353	0	0
TCONS_00211810	NONMMUT134070.1	0	0	0	0	0	0.040239775	0	0	0	0	0	0	0	0	0	0	0	1.02569696	0.455007095	0.596951339	0.30678515	0	0	0	0	0	0	2.786929492	0	0	0	0	0.668725835	0	1.066213366	0.094265411	0	0.561210599	0.77248266	0.192023938	0.625461138	0	0	0	0	0	3.802183217	1.312792089
TCONS_00271903	NONMMUT009005.2	0	0	0.327512293	0.311891241	0	0.533194065	0	0	0	0	0	0	0	0	0	0	0	0	0	0	0	0	0	0	0	0	0	0	0	0	0	0	1.813908314	0.734210439	0.150986073	2.113358505	3.158143146	0	0	0.072035794	0	0	0	0.31056668	0	0.396319286	0	0
TCONS_00271901	NONMMUT044096.2	0	0	0	0	0	0	0	0	0	0	0	0	0	0	0	0	0	0	0	0	0	0.334731842	0	0.285715819	0	0	0	0	0	0	0	0	0	0.347029784	0	0	0	0	0	0	0	0	0	0	0	0	0	0
TCONS_00271900	NONMMUT051178.2	0	0	0	0	0.111567408	0	0.375191136	0.274838031	0	0	0	0	0	0	0.068425611	0	1.33850908	0	0	0	0	0	0	0.142059688	0.190663118	0	0	0	0	0	2.541360054	0	0	0	0	0.939827476	0	1.869431939	0	0.298122984	0	0	1.317205274	1.216727104	1.16396423	0	0.888568695	11.08306243
TCONS_00271905	NONMMUT009005.2	1.020949975	0	0	0.130884759	0.230747008	0	0	0.946755674	6.503898302	1.465387304	6.187563961	3.283756241	2.519552396	4.733954532	0.538844916	1.356483104	0	0	0.30429845	0.137102211	0.16852046	0.592524674	0	0.632299044	0.357613023	0.227092345	0	0	0.146911531	0	1.198678051	0	0	0.396386682	0.184771581	0	0	0	0.45134174	0	0.268519309	0	0.25107586	1.159572917	0	0.198389032	0.265823555	0
TCONS_00271904	NONMMUT023056.2	0	0	0	0.14403223	0	0	0	0	0	0.235058588	0	0	0	0	0.60336978	0	0	0.179212855	0	0	0	0	2.780151298	0	0.081448986	0	0	0	0	0	0	0	0	0	0	0	0	0	0	0	0	0	0	0	0	0	0	0
TCONS_00820591	NONMMUT057411.2	1.017658534	2.488576751	3.103398196	1.292341013	3.534828679	7.510356526	3.432083861	3.177680349	6.674659313	5.366147487	11.5299653	5.536514752	9.97816931	7.164885804	2.370029127	2.359129906	14.44518999	12.13855326	19.03394726	4.096093343	7.916400085	11.48421	2.028523211	12.95656667	9.411290148	8.827706178	0	4.764209649	1.872320684	15.17800317	2.681444543	20.87131556	0.740816547	12.22855636	12.54228866	15.79133624	24.13237906	6.10532204	0	9.851137119	2.814887791	0	5.70441474	0	19.81043214	16.54183523	15.36780922	0
TCONS_00828634	NONMMUT075201.1	34.18654638	45.54747728	19.83281213	19.42059652	15.35921727	16.17348511	18.5645623	13.37748504	14.99725236	18.65095912	21.51099735	16.72765196	13.23888341	22.43121011	10.61658844	18.1260831	0	3.267835221	4.733984956	1.278995726	1.991638015	1.855749745	0	3.033809483	4.891059485	13.72056946	5.747669285	6.01871928	0	5.022755267	19.10515325	0	1.566577479	2.48907319	4.765301297	3.976293681	4.669307594	7.296233421	12.70819087	3.033496714	20.24462997	19.93144173	14.74883795	12.68091485	10.32629518	8.457564097	7.720425252	0
TCONS_00306585	NONMMUT148409.1	17.04741245	16.43516877	12.34526818	4.728213427	4.983604471	7.182356679	6.754636031	2.491850058	4.487498203	3.145414126	3.145482097	3.171543865	2.77667391	3.133067201	0.716491455	2.114200347	18.8689625	9.425972125	16.02820175	0.731690741	0.335494617	5.27722457	18.68794103	2.979417207	16.6227909	26.82314659	38.33917922	19.84504563	24.74764806	10.71381431	29.8051404	22.18260433	3.075406471	2.917570358	11.36301289	11.04137287	9.201500952	18.43008545	22.10818361	1.823468598	25.91767881	48.09784978	15.94921511	8.738639691	19.32572197	12.5224529	13.00928016	0
TCONS_00379757	NONMMUT097976.1	0	0.630421785	0.154687769	0.05220461	0.047976328	0.045421447	0.207967582	0	0	0	0	0.321627188	0.103696405	0.085440323	0	0	0	0.669003582	0.99580071	2.213012238	4.453517996	0.474789593	2.599635525	0.481768672	0.526631637	0	0	0	2.685542786	2.389286044	2.315531277	5.498668439	2.465352026	1.751238197	1.116211383	1.985733539	3.374967003	3.114924822	1.208138401	1.534459341	2.539239651	0.945381824	1.827792485	0	3.690547056	0.356514769	3.648913348	5.033276224
TCONS_00817801	NONMMUT057411.2	0	0	1.832234543	0	1.894733129	0	2.280312619	0.74078525	0	0	0	0.623053331	0	0.471027431	0	0	0	27.54610011	41.15352018	7.389474837	9.174081823	22.63704274	83.31896978	25.54920963	15.42841093	29.67462062	7.605957132	15.60615739	4.50724577	23.58043036	25.92264677	0	3.078889689	9.824302837	17.93566878	15.83962893	4.109458677	13.70955993	6.247986341	10.87382132	0	10.30458598	15.14523742	2.21822716	21.62422817	33.99731739	12.46715306	34.98464532
TCONS_00329207	NONMMUT134070.1	0	0	0	0	0	0	0	0	0	0	0	0	0	0	0	0	0	1.019456391	0.455007095	0	0	0	0	0	0	0	0	0	0	1.35384469	0.644630591	0	0.592348084	0.670704167	0	0.094265411	2.753779309	0.561210599	0.777406516	0.192023938	0.625461138	0	1.718165399	0	8.951507447	1.377996541	0	1.312792089
TCONS_00520099	NONMMUT023400.2	9.167978269	0	0	0	1.312107669	0	0	0	0	0	0	0	0	0	0	0	0	0	0	0	0	0	0	0	0	5.945708976	0	0	0	0	0	0	0	0	0	0	0	0	0	0	0	5.926534649	0	0	0	0	0	0
TCONS_00641204	NONMMUT062530.2	55.95701133	34.27885343	16.95991864	40.1665472	30.46219645	15.32397723	12.12516024	10.27638749	9.775836851	8.454771076	12.14169406	15.27251277	5.908098677	14.64252463	2.770668395	23.18139759	2.67701816	2.149844632	2.572611219	2.892000482	4.101359146	1.700480424	1.953633911	1.656024708	2.752579085	0	2.697079604	2.93969465	2.690484356	2.831288507	1.790371706	6.872049612	3.744072763	4.621706369	5.257727905	4.666604483	4.276267312	5.111207642	4.888685562	5.443652593	6.881948531	4.553618632	0.822974685	3.59538272	4.110463337	2.315740271	2.124322497	8.958854127
TCONS_00361081	NONMMUT056424.2	0	0	0	0	0	0	0	0	1.734116731	0	0	0	0	0	0	0	0	1.928346184	0	19.42634379	25.71084796	0	0	15.50159027	9.405272087	0	8.609848691	3.581314308	0	1.656243475	2.994856369	0	29.17038373	35.30279958	5.110128886	0	22.20792193	0	15.10498327	11.99759082	0	0	0	0	0	0	0	0
TCONS_00356090	NONMMUT136346.1	0	0	0	0	0	0	0.047151904	0	0	0	0	0	0	0	0	0	0	16.13514708	3.64423444	0	0	0	0	0	3.078751158	0	34.4736862	11.17428843	35.5222733	0	0	7.941582141	0	0	0	1.562779175	10.96725725	9.016108327	2.932015543	0	9.908700183	0	0	0	0	4.312126852	0	0
TCONS_00356093	NONMMUT139470.1	0	0	0	0	0	0	0	0	0	0	0	0	0	0	0	0	17.65627328	2.732638617	3.206562321	15.07004499	9.016843401	1.149942157	4.912217107	5.89773469	3.982212581	0	4.061994532	3.860544065	0	9.471242972	0	0	9.083452114	13.70844648	4.311266023	5.473847059	0	0	0	8.773047493	0	0	2.058259688	4.467696955	0.576113888	12.92139378	0	0
TCONS_00072015	NONMMUT075201.1	7.233488994	0.895801543	2.961682086	0.929340785	3.00513723	1.894719331	1.940653211	0.594038436	1.724486802	1.017204675	2.077124925	0.807760092	1.552982153	1.900912234	0.238541541	0.424865874	20.58091562	38.89482487	49.40770566	11.83783196	12.31987229	20.88508414	65.02279748	31.80398187	45.87923592	41.06891797	54.40510448	33.73419942	29.34517764	23.55983683	18.42302163	16.61027004	5.901628856	7.270744915	14.99900808	8.997266775	16.18693755	17.87940703	28.9781233	6.611973685	10.14570255	33.08026851	9.465889121	10.77027889	23.85707512	17.52340325	14.8671064	21.22128571
TCONS_00072013	NONMMUT022630.2	4.396925602	1.340805156	10.1569071	2.832124173	5.898941274	14.37705392	1.810786213	3.222074343	3.477085215	1.853509153	2.452454343	1.916423192	2.651199671	4.538540483	3.236103411	2.159125169	0	2.462843594	2.582767306	1.19157636	2.451546962	1.904800876	2.335113493	2.77176035	3.358488418	3.625744979	2.894929658	3.202400338	2.128614528	2.310894084	8.115996886	11.27914088	4.009229043	2.960605557	2.52351099	11.64504483	3.370246004	3.367976066	0.681250643	1.364516527	1.020173267	0.968655874	1.529327	6.222987595	2.638106187	3.778807498	2.260420759	3.418442768
TCONS_00266032	NONMMUT142450.1	0	0	0	0	0	0.032126367	0.096401312	0.030924021	0.095618384	0.077395719	0	0.033138566	0.036269897	0.188135864	0.070430162	0	2.917949795	0.605022098	0	0	0	0	1.730789403	0	0	2.242231671	1.243546346	0.509037256	1.963138722	1.063240728	0	1.404611081	0.208181842	0	0.765771772	1.612938507	0.80516982	1.594975578	1.151971273	0.481343077	2.756981671	4.560196081	2.059734184	3.453799028	1.73699527	1.245431334	1.054513688	0
TCONS_00266031	NONMMUT142450.1	0.383013955	0.331103878	0.035949465	0.088769509	0.195184409	0	0	0	0	0	0	0	0	0.148889382	0	0.260099389	4.648642036	8.554045701	20.29687946	8.877684058	8.013306152	4.542246013	30.43019253	10.60568971	11.64325566	2.017377692	5.005587097	11.56846692	2.81295515	8.051464841	4.483913355	0.304950876	5.337354916	10.03076629	4.733613212	4.162157871	5.27369811	6.488941407	5.863573872	5.383726059	3.972509926	7.435806247	2.040291407	0.381854441	10.38833072	1.639325646	4.073211362	10.18717702
TCONS_00139677	NONMMUT010053.2	0	69.32868225	0	15.65178728	15.26111758	0	19.54852268	0	0	0	0	0	0	0	0	4.360156995	0	0.1918714	0	0	0	0	0	0	0	0	20.64787821	0	16.80427514	0	0	0	0.035673218	0	0	0	0	0	0	0	12.62503501	0	0	15.13941276	12.8189126	0	0	0
TCONS_00130591	NONMMUT144435.1	0.274286705	0	0.333865558	2.853434634	0.273258172	0.20453969	0.167800368	0.442675153	1.60498814	0.212698643	0.615477579	1.227354297	0.768317765	0.748712832	0.433416381	0.347641954	0	0.605585628	0.360144922	1.287429768	3.032877179	0.355554998	0.26152646	0.071482567	0.34193529	0.203487764	0	0	0	1.687683695	0.483884245	3.122990895	2.030708889	1.880343793	1.303803146	3.306622605	3.18154288	0.61954032	1.512327188	1.374607577	1.625873785	0.252978813	1.303043252	0.123978714	1.676636361	2.162814027	0.991350499	19.83746271
TCONS_00378401	NONMMUT139470.1	0	0	0	0	0	0	0	0	0	0	0	0	0	0	0	0	0	78.99364121	85.79355533	20.73223358	31.41527183	64.96501497	101.0579657	60.56912069	52.42333028	58.27523283	51.14703232	72.09711713	69.99119092	81.47059797	95.17354692	36.08432274	64.10055937	63.50744598	91.27672153	64.37906213	90.15897267	70.78554832	137.4858054	58.1293337	40.47712842	77.30374776	75.14492696	36.27505605	157.837249	129.2775988	69.43447218	354.3425182
TCONS_00245503	NONMMUT115186.1	0	0	0	0	0	0	0	0	0	0	0	0	0	0	0	0	4.015527241	2.44196169	2.472995133	3.065635002	2.829296128	1.916905205	6.512113038	1.727602585	1.36779245	1.627902112	0.385297086	1.499461693	0.133555937	3.833279591	7.221101364	9.001561991	4.906961603	6.238742473	6.703262957	6.799909389	5.324226485	4.73948345	3.83357357	4.818555757	2.626411499	0.514305927	2.091727325	0.507444878	9.194457464	3.495457014	4.07161812	15.03807657
TCONS_00293104	NONMMUT059992.2	0	0	0	0	0	0	0	0	0	0	0	0	0	0	0	0	0	0	0	0	0	0	0	0	0	0	0	0	0	0	0	5.412694337	0	0	0.821551872	3.075505685	2.49237964	3.214763745	6.897513283	0	9.415310023	21.22593432	3.284629131	13.08595331	5.399472188	4.423260538	5.211175518	0
TCONS_00841255	NONMMUT028528.2	0.054857341	0	0	0.050543116	0	0	0.010487523	0.094858961	0	0	0	0	0	0.161234438	0	0	0	0	0.024009661	1.316093649	1.761345081	0.07437283	0.189762974	0.247305853	0.034193529	0	0	0.443570758	0	0.113776429	0.532272669	0.183705347	2.209528986	0.184903309	0.38263788	0	1.001707065	0.371724192	0.0351704	0.078638677	0.125067214	0	0	0	0.378595307	0.021846606	0	0
TCONS_00129013	NONMMUT119105.1	0.779522817	0	0.051022513	0	0.131905623	0.208303221	0.009323408	0	0	0.024274233	0	0.125934599	0	0	0	0.014063697	0	0.249017478	0.646700232	0.006253689	0	0.143242287	0	0.169360071	0.21146988	0	0	0.308079399	2.524741438	0	0	0	0.168147159	0	0.497103293	0	2.463129972	0.026547303	0	0	0	0	0	0	0	0	0.077148312	0
TCONS_00323697	NONMMUT011099.2	0	0	0	0	0	0	0	0	0	0	0	0	0	0	0	0	0	0	0	0	0	0	0	0	0	0	0	0	0	5.174912278	0	0	0	0	2.510699707	0	0	0	0	0	0	0	0	67.88913233	25.46962071	0	0	0
TCONS_00185851	NONMMUT047813.2	5.686841119	3.380901703	1.43258765	0.942596614	2.57374065	2.753840574	1.162279739	0.127775021	0	0.295544765	0	0.950354517	0	3.458409045	0	0.246857391	7.094098125	2.493357679	3.750813327	0.314892173	0.286185476	1.457048922	2.542068446	0.69152235	1.058204239	4.323504522	11.57586566	2.107943248	6.177629877	5.232957219	14.15477549	21.32800705	1.34091256	1.345866706	3.37238604	7.151904698	7.871581818	8.403661744	3.786726598	0.889132731	13.399076	14.7711799	11.28716639	23.21749386	17.46379025	8.024433279	9.581119328	0
TCONS_00523263	NONMMUT050552.2	0	0	0.563535603	0.347914349	0	0.374212181	0.856704781	2.493304562	0.553623636	0.591674451	0.699574198	0.749390341	1.409598162	1.435125793	1.54897597	1.300623363	0	0.346518538	0	0	0.026745066	0	0	0.184496505	0	0	0	0	0	0	0	0.378065604	0.333614919	0.394948772	0.142794788	0	0.390748202	0.407657531	0.214433927	0.088880696	0	0	0	0.383466164	0	0	0	0
TCONS_00830003	NONMMUT011099.2	0	0	0	0	0	0	0	0	0	0	0	0	0	0	0	0	0	0	0	0	0	0	0	0	0	0	0	0	0	30.35845253	0	0.001653348	0	0	10.78956625	27.81752266	0	0	8.849048423	0	0	0	0	0	0	0	0	0
TCONS_00601028	NONMMUT038762.2	0	0	0	0	0	0	0	0	0	0	0	0	0	0	0	0	0	0.226465857	0.905692451	0.009519656	0	0.187346566	0	0.098097909	0	0	0	0	0	0	0	0	0.04225263	0.017280445	0	0	1.545374586	0.119323466	0	0	0.889853229	0.998507374	0.127355333	0	0	0.174117452	0	0
TCONS_00296402	NONMMUT029552.2	0.713145434	0	0.265639149	3.526399735	0.276224975	0.261047189	0.116537356	0	0.194689925	0.159736681	0.31422928	0.06046229	0.106027852	0.053733205	0	0.031619616	2.67701816	0.995422897	1.628047126	6.410049518	3.634269514	5.159659537	0.651211304	1.467358388	1.629646495	0.203487764	0.577945629	1.73523705	3.344240669	9.784697033	10.93578393	28.10691805	17.9069951	7.540535962	11.93627529	25.65595146	19.52252869	12.39170474	9.567931393	6.974321831	5.00268857	7.336385573	3.366652275	6.07495701	23.47290906	9.310193449	13.05714823	48.5582692
TCONS_00266349	NONMMUT139470.1	0	0	0	0	0	0	0	0	0	0	0	0	0	0	0	0	5.6752785	0	0	0	0	0	0	0	0	3.280833219	5.586422454	0	0	0	6.317786255	3.936805581	0	0	0	5.098758724	0	0	2.695494605	0	5.753967326	7.679930801	3.941088605	23.61484564	0	0	0	0
TCONS_00296794	NONMMUT059992.2	0	0	0	0	0	0	0	0	0	0	0	0	0	0	0	0	0	22.05263596	32.15539533	5.414121029	6.065150437	82.53824344	58.26439632	15.0023322	9.034374878	0	0	52.66508324	0	0	0	0	0	3.224644964	0	9.129665011	5.27599019	1.955609998	0	3.156400934	0	0	9.646806389	0	0	17.01498903	0	0
TCONS_00256650	NONMMUT117023.1	0.462447385	3.469306439	0.0577882	0.050579236	0	0	0.337205328	0	0.059481833	0	0	0	0	0	0	0	0	0.014662206	0	0	0.013266349	0	0	0	0	0	0	0	0	0	0.305040628	0	0.009928661	0.011877647	0.109321059	0	0	0.07474754	0	0.01155306	0	3.642641927	0	0	0	0.035631815	0	0
TCONS_00049572	NONMMUT057313.2	23.3692273	21.68730404	24.40714342	35.2304424	23.29967035	24.18120035	22.98682565	27.72939294	20.6703018	17.68496164	11.58216899	23.07480404	11.20371563	21.92276445	22.53765183	19.19931702	5.354036321	4.589166082	6.720880482	9.873092547	11.14311594	10.02427026	3.777025562	5.301623695	6.242678396	14.85460677	8.669184442	6.867534555	12.83152023	3.973205636	9.869690166	20.20758814	7.264333858	7.861223917	7.043626437	8.827695701	12.28143972	6.752989491	6.049308753	9.129619109	4.627486927	4.806597445	5.623660349	12.39787145	9.951648079	3.65500278	8.87124156	32.63582575
TCONS_00345039	NONMMUT075201.1	0	0	0	0	0	0	0.017566601	0	0	0	0	0	0	0	0	0	0	36.4548251	8.181988432	0	0.471589174	0	75.70487698	12.7063479	0	0	0	0	0	0	0	0	0	0	2.982095403	0	0	0	50.57601958	0	0	0	0	0	0	0	0	0
TCONS_00427842	NONMMUT041688.2	10.35695628	9.398052487	7.770828876	16.37249022	6.398769508	8.427580677	9.16717534	13.66152439	17.93365111	15.33942735	20.06115598	17.47585518	19.13826566	18.6522475	22.48358314	14.29966712	42.64891482	37.41375423	46.25331633	52.77922888	57.01045236	35.67700682	76.74616385	14.61431291	23.16724428	37.88087517	24.07374725	37.96556036	30.50030294	89.85540878	99.14193	76.78791642	63.8163868	89.94245915	106.9686018	57.80634971	137.1279192	95.3124681	90.77420379	77.12026044	81.5148081	38.56965577	72.15824895	80.96640714	80.72008914	52.97393505	70.33330843	138.0962569
TCONS_00003184	NONMMUT138719.1	4.791349884	5.950930008	1.602603776	0.736715887	1.379524364	1.315326568	1.317306305	0.342156274	1.08487471	0.332820202	0.687880123	0.212674343	0.543333129	0.170985117	0.424422991	0.139720462	0	0.359792791	0.708501101	0.161118019	0.308152267	0.82808759	0.260484522	0.442804716	0.351082059	0	0.245048947	0.079321524	0	0.024727411	0	0	0.144970359	0.139689975	0.698115726	0.027999627	0	0.03872127	0.044701578	0.04475023	0	0	0.034290612	0	0.068850261	0	0	0
TCONS_00003185	NONMMUT138719.1	26.01779458	8.290013357	10.84239201	6.728314588	22.99120091	9.792964926	6.41930797	2.3455143	3.000549645	2.538611484	3.84651106	2.76516887	1.947076179	1.203686468	1.255065486	0.887403494	0	1.339186401	2.097940211	0.758087604	2.068402327	0.757625864	0.390726782	2.514548205	1.185250296	2.727956964	0.910842312	0.370516984	1.524140356	0.942372235	0.193553698	2.204464161	0.658849273	0.969712863	1.130043034	0.371995043	0.105538277	1.757945659	2.171033605	1.075650293	1.125604928	0.758936439	0	0.743872287	1.433415919	0.152926244	1.380809623	0
TCONS_00705437	NONMMUT126005.1	4.608071507	0.222336254	1.541683131	6.614153123	0.702663871	0.859080335	0.849877404	1.169927191	9.350223178	3.451859697	4.775490537	5.311888795	3.380492192	10.29220707	1.129320559	3.432995903	6.692545401	5.262187421	6.220927301	11.74294101	11.7738283	8.072134194	12.13402022	5.520824986	6.616943668	3.866267516	4.139439247	11.79197668	6.491352774	18.32483164	10.80828044	21.35886955	21.37993504	16.84073338	16.45797797	29.34472897	31.6315151	18.99454863	13.70829636	14.04989583	10.32992656	17.84183674	4.447766687	5.070481465	28.9437735	9.1347652	29.56986106	105.3330875
TCONS_00480137	NONMMUT111627.1	0	0	0	0	0	0	0	0	0	0	0	0	0	0.034823853	0	0.015801907	4.015527241	4.343832418	5.522270162	3.850712451	4.931816664	3.773845286	11.59156121	8.203124904	3.146556926	1.220926584	1.155891259	2.579074112	3.207212277	1.724528295	1.209710612	3.674106935	2.717461123	4.688096969	2.522575653	2.853295312	1.265775124	2.725977409	0.633067195	4.918393585	1.500806571	5.56629282	0.685812238	3.099467862	8.491351893	2.250222299	3.71756437	0
TCONS_00457439	NONMMUT022630.2	0	0	0	0	0	0	0	0	0	0	0	0	0	0	0	0	0	0	0	0	0	0	0	0	4.269916934	0	0.937235162	0	11.38096919	0	6.889447102	32.86231466	0	0	0	0	21.19974915	1.673812083	0	0	9.999373914	35.15090009	0	14.02707574	0	0	0	0
TCONS_00792625	NONMMUT140090.1	2.194293643	0.993311635	1.796982268	16.67513489	2.576434195	1.963581026	1.761903869	4.620801349	3.112704271	3.296828973	4.87374314	6.239708282	2.783827213	9.230166623	1.79120155	3.812620917	4.015527241	1.721896064	3.745555211	6.195626896	7.594231545	2.026014212	8.59598921	1.727876602	0.598386758	0.406975528	5.5870004	4.924052265	0.403472486	5.426415074	8.735223554	7.348213871	17.23981737	13.89638727	11.54999526	9.786536258	8.107871245	7.031782635	4.170189466	9.279340095	6.034868289	2.529788129	3.455636413	4.091297578	9.088504863	13.08884802	6.231345992	1.279836304
TCONS_00048425	NONMMUT064966.2	0	0	0	0	0	0	0	0	0	0	0	0	0	0	0	0	0	0.48337275	0.024009661	0.008662112	0.006596674	0.198569737	0	0	0	0	0	0.544064681	0	0.368976959	0.422092227	0	0.13826442	0.099505071	0.351502494	0.206850577	0.880363704	0	0.581085344	0.028151645	0.26801904	0	1.440891511	0.570054129	0.315532146	0.480472413	0.131460157	0
TCONS_00811510	NONMMUT001767.2	2.893724741	1.053406989	6.88279559	10.06242654	0.119609006	2.187633803	4.236036401	6.016239911	17.23217402	8.601479965	7.608757644	18.70578491	8.164674447	22.15402965	2.604940806	14.8754096	0	0	0.307539754	0.110249208	0.025391221	0	0	0.352986871	0.33791755	0	0	0	0	0	0.248522948	0	0.044351492	0.041546239	0	0.582045577	0.870545394	0	0	0	0	0	0	0.156833074	0.528086369	0	0.102002885	0.985153995
TCONS_00704349	NONMMUT075201.1	0	0	0	0	13.71927787	0	3.074564201	0	0	0	0	0	20.71856283	0	0	0	0	0	0	0	0	0	0	0	0	0	0	0	0	0	0	0	0	0	0	0	0	0	0	0	0	0	0	0	0	0	0	0
TCONS_00279266	NONMMUT096229.1	14.70922801	22.01840792	10.17041884	9.016492249	18.20242951	5.798959302	5.941957871	2.938224711	4.907372827	2.921309518	5.816095266	8.73248498	2.516903024	4.733345115	2.42393529	9.433359243	5.354036321	4.032357074	5.522918422	6.398486351	7.806141395	5.228699042	13.48788852	7.140929705	6.086294291	7.666808484	7.32064464	12.51045875	4.061836719	6.069043307	17.75855179	7.899329911	11.32505201	7.791719263	10.20972814	9.467740506	7.696254858	14.24880783	12.34266491	4.871219913	8.504570569	6.071491509	2.865014914	2.851510433	18.18279683	5.632229886	14.90799961	35.76246584
TCONS_00831998	NONMMUT076422.1	0	0	0	0	0	0	0	0	0	0	0	0	0	0	0	0	0	33.95330667	28.09937119	1.057001168	0	24.73245201	0	8.106522172	22.5579156	61.46653143	0	59.12698341	13.06203777	12.93285289	14.36894265	0	0	0	10.89609547	0	15.20910916	5.196704207	11.65821376	0	17.91700405	35.49975787	16.96085674	0	38.78270835	0	8.890218841	0
TCONS_00551765	NONMMUT118324.1	0.341267519	0.170021842	0.101102347	0.12391371	0.0828753	0.263542573	0.076548431	0.128850089	0.147464365	0.081383818	0.241155306	0.184686641	0.026864628	0.280244954	0.109437636	0.242148423	1.453620861	0	0	0.00460246	0.006682948	0.080185381	0	0.01206864	0	0	0	0	0	0	0	0	0	0.008635968	0.014582755	0	0	0.03457035	0.045862201	0	0	0	0.035936561	0.218574474	0.05576168	0	0.036148888	0
TCONS_00386867	NONMMUT135292.1	0	0	0	0	0	0	0	0	0	0	0	0	0	0	0	0	42.74261046	33.97624442	32.40495175	0	0	12.60408457	56.10823569	0	66.50516584	157.8835107	36.64637647	38.78252707	67.57235934	24.49521182	29.60263484	58.26509001	0	0	0	0	18.27844279	41.77563477	0	0	30.89697981	48.52766078	22.04392559	0	0	12.86199286	20.15443888	0
TCONS_00206512	NONMMUT139470.1	0	0	0	0	0	0	0	0	0	0	0	0	0	0.037226699	0.143569176	0	0	3.504340255	7.034638739	43.95246837	38.55790996	4.722048629	6.44829433	14.73910956	3.322089407	1.211973122	2.043615746	3.749044093	5.737963732	10.18331275	5.170787041	1.339579389	16.73449764	36.34433988	16.14533448	4.115731823	3.825104006	2.865343004	9.28259394	26.82640446	1.997948748	18.06901171	3.018156786	0	2.113535346	3.674970578	2.294657756	4.34216462
TCONS_00206510	NONMMUT139470.1	0	0	0	0	0	0	0	0	0	0	0	0	0	0	0	0	0	2.142800512	1.305885488	0.182725404	0.413168128	1.346208516	0	0.804256315	0.553541944	0	0	1.00209025	2.177629557	0	0	0	0	0	0.091790576	0	0	0	0	0	0	0	0	0	0.105411751	0	0	0
TCONS_00206511	NONMMUT059992.2	0	0	0	0	0	0	0	0	0	0	0	0	0	0	0	0	0	0	0	0	0	0	0	0	0	0	0	0	0	0	5.855821967	4.404519394	0	0	0	0	2.414927887	0	5.794745399	0	0	12.990968	0	6.184430215	0	0.620072228	3.893670705	0
TCONS_00217884	NONMMUT090135.1	0.47720401	0.597476949	0.317987305	0.212755457	0.056759626	0.212707642	0.133579581	0.07395837	0.076407163	0.123976722	0.314341185	0	0	0	0.350254613	0.015975728	0	0.019139136	0.14684309	0.093248844	0	0.394140444	0	0	0.592368696	0	0	0	0	0.403508105	0	0.193992846	0.225858431	0.072644232	0.118688602	0.192690766	0.512331034	0.034663281	0	0.185730937	0	0	0	0	0	0.022960783	0.04248645	0
TCONS_00707871	NONMMUT136346.1	0	0	0	0	0	0	0	0	0	0	0	0	0	0	0	0	0	0	5.490553399	6.441837964	6.167166604	13.0297612	0	7.300609845	4.659996713	0	0	0	0	0	0	0	7.022629761	5.707047613	0	0	0	0	0	2.891864459	0	0	4.94837533	0	0	3.275417995	0	0
TCONS_00733435	NONMMUT034071.2	1.53600555	1.451062747	0.544780214	0.156866666	0.974868048	1.551760814	0.2276212	0.253716102	0	0.053227836	0.436093841	0.081005384	0.026626185	0.070257123	0	0	0	0.509754285	0.261441204	0.42118208	0.545645796	0	0.130242261	0.144519879	0.512902935	0	0	0	0.133555937	0.094813691	0	0	0.049122311	0.101759782	0.203024825	0.202477302	0	0.134378295	0.191186293	0.008724388	0	0	0	0	0	0	0	0
TCONS_00038886	NONMMUT145089.1	0.054857341	0	0	0	0	0	0	0	0	0	0	0	0	0	0	0	0	0	0	0	0	0	0	0	0	0	1.155891259	0	0	0	0	2.160558583	0	0	0	0	0	0	0	0	0	1.580105665	0	0	0	0	0	0
TCONS_00038885	NONMMUT103325.1	0	0	0	0	0	0	0	0	0	0	0	0	0	0	0	0	0	0	0	0	0	0	1.542459094	0	0	0	0	0	2.288347429	0	6.237606636	5.013502619	0	0	0	0	0	0	0	0	4.777192383	0	2.400068507	0	0	0	0	0
TCONS_00812789	NONMMUT149857.1	5.026468448	0.61552211	1.554173631	1.478043021	0.995401448	1.014094148	1.229662075	0.389427656	0.495649519	0	1.974060406	0.759490863	0.289099429	0.472089559	0.522050031	0.413583312	0	0.29377634	1.579115436	0.936748795	0.568813792	0	0	0.534844478	0.514424547	0	0	1.501051123	0	2.377604997	2.495197497	1.163222256	2.45092793	0.451622844	5.745534515	1.504993279	1.493648857	0.813642303	3.885871954	3.620446204	0	0.831541358	0.485109286	2.322493259	5.67292617	0.939316686	2.975219874	0
TCONS_00211795	NONMMUT090135.1	0.985073274	3.210217654	0.50165264	0.508176241	1.313044554	1.451986353	0.856851606	0.322646947	0.915280964	0.164150178	0.298282816	0.42691809	0.903329742	0.712165199	0	0.163786766	1.33850908	0.281806553	0.345354971	1.163323005	1.575310917	1.363723464	1.808544033	1.229565673	2.962031546	0.406975528	0	0.38986004	0	3.524528289	1.256889326	7.154221024	4.535812773	1.983737177	1.816126924	4.511726546	7.395616161	3.413945958	1.899201585	1.588434539	0.448115829	1.264894064	2.676828036	3.347425291	1.892976537	0.457664556	0.528035762	0
TCONS_00510417	NONMMUT050526.2	0	0	0.77512781	0.980052458	0.074716592	2.102899827	2.330768093	8.580214399	4.578787983	3.522316122	0.621240687	3.573552699	6.908289445	6.874628992	9.168381777	4.495215894	0	0.08598001	0.110876617	0.292158121	0.82808829	0.596404861	0	0.550707651	0.108598648	0	0	0.377024648	0	0.32784678	0.776440659	0.354735025	2.996624704	1.36905194	0.395633396	0.577965632	0.182305828	0.470107195	0.884324531	0.533975451	0.482009044	0.505957626	0.459117003	0.555176683	0	0.126644777	0	0
TCONS_00032130	NONMMUT023400.2	24.39209728	12.6221765	11.72170551	6.82002181	15.07268656	11.64834446	7.040788097	2.38298359	5.649509616	4.191253356	6.853510702	3.406230104	2.316981443	4.78753103	2.241629524	3.478726622	21.15513601	3.645306146	7.103834583	0.114454825	0.210987377	1.134900635	9.915473554	2.398937067	3.707621446	14.82062432	8.071588661	6.266160448	4.637195697	2.448639414	15.24767644	7.75052858	0.299303729	0.810751492	3.561097374	1.877254985	2.461624726	6.745957709	5.854851613	1.015103994	6.775766466	11.48144342	3.476347942	1.870466866	5.830421818	3.048344368	4.100438095	0
TCONS_00510418	NONMMUT050528.2	0.747431272	0.171677361	0.713971496	0.395760548	0.599333245	0.259383599	0.717419988	4.355164637	2.036778585	1.780845979	3.03217827	2.372717303	2.419379655	2.14998984	4.795643905	1.922412602	0	0	0.101176714	0.194626115	0.321936262	0	0.130242261	0.324292578	0	0	0	0	0	0.56254859	0	0.736842146	0.423233365	0.662144774	0.330684159	0	0.35814594	0.873613806	0	0.313513822	0	0	0.361148724	0.250932918	0.157387478	0	0.173026067	0
TCONS_00814370	NONMMUT057411.2	0	0	0	0.014748766	0.079401017	0.165513517	0	0	0	0	0.06182752	0	0	0	0	0	0	0.406899693	0	0	0	0.805579412	0.426413162	0.24118218	0	1.019677185	4.596401591	1.191862122	1.809282282	0	0	1.336823808	0	0	0	0	0	0	0	0	0	2.817930997	0.205503637	2.393781019	0	0.363374603	0.260264911	0
TCONS_00647443	NONMMUT000238.2	1.007180782	4.158995818	0	0	0	0	3.898233284	0	0	0.624562979	0	0	3.718446034	0	0	0	0	0	0	0	0	0	0	0	0	0	0.948601426	0	0	0	0	0	0	0	0	0	0	0	0.948158806	0	0	1.364061759	0.583557633	0	0	0.372681257	0	0.353554779
TCONS_00647441	NONMMUT000238.2	12.72767113	10.89911192	46.27144891	38.60760871	35.98056716	97.98398863	9.13504157	23.02755042	32.12821486	14.11555936	42.97527435	14.83821044	14.08519868	34.0622376	35.38953108	21.91797192	13.97938883	4.172435927	6.910292702	4.294400514	5.945905936	6.353535925	10.35842748	8.327713061	15.17626785	11.37537298	1.234106567	3.655867544	2.419232247	9.97331939	9.509196404	13.65555325	3.301577498	6.822448833	6.927743846	5.95184069	6.210576963	4.353045175	0.209932116	3.428589125	7.175981552	0.738445155	6.660677034	11.29359304	9.617835188	4.705737158	6.072128021	0
TCONS_00391204	NONMMUT137622.1	33.46297805	36.58333643	16.03555293	23.82910487	39.92231629	13.74712622	8.652206497	4.553230149	5.20993741	3.482940286	5.091678155	25.73419912	2.41092816	10.88186196	14.19476573	8.864869836	6.692545401	15.07721413	18.1384109	6.171830036	7.417063735	13.06805293	33.99323006	10.87460117	10.48009438	16.71183959	29.08993002	13.52526443	25.76467652	6.106001683	8.661527984	12.85937427	2.523100513	4.109606223	4.526662806	5.4132612	4.310477451	7.218171341	8.89811113	3.010986522	7.128831212	11.63702539	6.926703601	4.587212436	15.63284926	6.757657811	7.180210041	0
TCONS_00813167	NONMMUT149857.1	6.946914244	10.33342094	3.251418473	1.209615489	8.288232658	4.691785959	2.676499777	0.178429706	0.121249559	0	0.063562048	0.090783977	0.038097964	0	0.26644272	0.049918224	0	0.440742778	1.118346022	0.230597371	0.069703083	0.086384406	0.663975045	0.942521469	1.065213912	0	0	1.160283458	0.970684552	0	0	0	0.09040738	0.073409983	0.197086852	0	0	1.165541205	0.711497186	0.019649737	0.383956348	0	0	0	0.193408117	0.146437802	0.044787799	0
TCONS_00603768	NONMMUT044546.2	55.33838509	7.517382457	7.133508984	3.550334874	2.722510206	7.76701293	1.727934781	0	11.55071055	14.1706749	13.55231272	11.9196424	16.96109155	33.21739353	20.45833674	22.16900101	40.00134386	21.54754645	11.317098	13.81001103	16.98011703	20.45382684	27.83042676	27.65645613	29.11437091	0	0	20.54520427	0	6.53112731	12.52035967	0	14.0731476	12.22671855	17.13928598	18.38604833	21.62741009	10.48987084	0	18.44239475	16.43733383	7.084165697	23.41609872	0	32.17530079	19.85113731	0	0
TCONS_00036026	NONMMUT038240.2	0	0	0	0	0	0	0	0	0	0	0	0	0	0	0	0	0	0	0	0	0	0	0	0	4.433242325	26.63268204	10.38337118	8.6139276	0	10.01716124	31.27726143	20.60677986	1.352099049	0	12.75900342	6.83510892	15.03651902	13.79415816	17.17806732	1.723662553	24.97492215	33.14300725	11.30602623	18.85158343	20.06874231	11.88555879	12.84641544	9.346964486
TCONS_00692018	NONMMUT027922.2	3.184084648	4.218263412	2.11965351	1.645564918	5.632007076	2.053960297	1.499610918	0.300924245	0.970920553	0.508163646	1.152901411	0.942064845	0.401644735	0.550547699	0.23323219	0.279456726	0	0.587980545	0.997481387	0.250494229	0.176371431	0.228760994	0	0.948948943	0.76313118	1.220926584	1.926485432	0.329821594	0.133555937	0.329060395	0.968300762	2.939285548	0.365849574	0.46586581	0.619235636	0.755643264	0.855253462	0.650517336	1.112615595	0.415679742	0	3.54170338	0.437993986	0	0.811275659	0.109233032	1.554472987	0
TCONS_00713012	NONMMUT056775.2	0	0	0	0	0	0	0	0	0	0	0	0	0	0	0	0	0	0	0	0	0	0	0	0	0	0	0	0	0	0	0	0	0	0	0	0	0	0	0	0	0	0	0	0	0	0	0	0
TCONS_00292880	NONMMUT098038.1	0.140434793	0	0.325440362	1.2202346	0.310069952	0	0.140711096	0.21830209	1.364142647	0.385915101	0.727382594	0.801341633	0.299167042	0.480656227	0.595947524	0	0	0.561285938	0.765836172	2.147679205	2.544451223	1.461516547	3.77402999	0.492556583	0.21442762	0	0	1.033069128	1.247412454	1.642855782	1.080610296	2.629925744	2.682212143	2.264665645	2.465165799	4.508206593	5.642928135	3.025927855	1.822670795	1.189313654	0.91586721	3.100255352	0.906232291	1.036090117	2.77153399	0.395226955	2.723133604	10.9832352
TCONS_00812876	NONMMUT149857.1	0	0	0.041094922	0	0	0	0.114639114	0	0	0	0	0	0	0	0	0	0	1.454271673	0	1.039517295	2.12536998	0.589510186	0	4.355617451	0	3.428972311	0	0	2.975225614	4.358831879	0.260232947	0	2.179088038	3.425024949	2.128401949	2.695724079	0	0.607180491	2.491963502	5.933060565	0	0	1.110501466	0	4.029552111	0.78826925	0.158722296	0
TCONS_00156868	NONMMUT147127.1	0	0	0.047683857	0.121577987	0.079401017	0	0	0	0	0	0	0	0	0	0	0	0	0.020099223	0	0	0.166224233	0.091408552	0	0	0	0	0	0	0	0.190689295	0.165972296	0.620924072	0.302102212	0	0	0.151277984	0	0.290750272	0.105265006	0.172270907	0.256512856	0	0.502288883	0.611710977	0	0.252503076	0.155075542	0
TCONS_00429531	NONMMUT112645.1	0.658288093	0.165551939	0.677550691	1.095622581	0.273258172	0.20453969	0.377550829	3.761094582	16.48760544	4.812306807	16.3381321	9.4797023	9.378775479	15.41880054	2.926589938	8.562658364	0	0.093921603	0.320096807	0.218947538	0.225640753	0.541061953	0	0.416981639	0.779270526	1.220926584	0.385297086	0.269903105	0.133555937	0.018962738	0.048388424	0	0.762914144	0.646634065	0.396809653	0.026666311	0.171050692	0.61954032	0.070340799	0.738950894	0.125067214	0	0.137162448	0	1.352126098	0.021846606	0.35405375	0
TCONS_00148716	NONMMUT077040.1	39.52394624	33.55953026	21.60173005	30.84117366	27.90207967	22.80612092	18.58510736	14.06903848	15.13863722	13.74328356	17.61681475	20.43768243	11.25434512	15.91813976	10.27711506	18.88534893	50.12716506	31.73954317	39.46211155	39.31464409	19.81372025	37.84579955	15.71802676	24.65346754	34.25222219	95.93552726	106.0326023	56.86918396	106.8050837	32.98932385	91.36731345	81.50546973	36.29665413	33.84145764	48.64859422	68.7015112	58.89747442	59.06960718	50.99676307	13.60875803	56.25298176	72.79743617	49.90727664	53.01825747	60.48714464	51.67264194	54.11771751	45.60024755
TCONS_00356840	NONMMUT009005.2	0	0	0	0	0	0	0.04322957	0	0	0	0	0.057705773	0	0.052810373	0	0.023276209	0	0.424828284	0.112197148	0.032358622	0.017546887	0.037333275	0	0.039988539	0.042878685	0	0	0	0	0	0	0	0.065206146	0.030059976	0.064594943	0	0	0.044452018	0.0615482	0.009884461	0.907737841	0	0	0	0.48617046	0.327305856	0.131566373	1.102898935
TCONS_00650737	NONMMUT024904.2	9.026172042	6.62207757	3.191361951	5.457994385	2.927766131	2.836447336	2.139454697	1.928798883	1.799580793	1.010318556	1.00714513	2.092538474	0.688836617	1.968662039	2.54632124	3.64551575	1.33850908	0.636788472	1.632656981	1.574209989	1.911382909	1.113041732	1.562907129	0.649299981	1.079181969	1.831389876	0	1.079612419	0.267111874	1.706646433	1.548429584	0	3.618304762	2.629163057	3.472084466	3.866641809	2.599970526	4.044173349	0.527555996	1.835728826	0.8754705	3.54170338	0.994427745	0.123978714	2.541997064	0.24031267	1.843097604	0
TCONS_00805976	NONMMUT031601.2	0	0	0	0	0	0	0	0	0	0	0	0	0	0	0	0.019499553	0	0	0	0.006618602	0	0	2.95076866	0	0	0	0	0	0	0	0	0	0	0.031838219	0	0	0	0	0	0	0	0	0	0	0	0	0	0.485697877
TCONS_00805975	NONMMUT065892.2	0.103735232	0	0.076779259	0.383865217	0	0.178004074	0.166164315	0.446437892	0.549635484	0.093241768	0.292407803	0.333739766	0.303406036	0.886249639	0	0.240757855	0	0	0.052028936	0.266249329	0.225707118	0.085487789	0	0.018460373	0.246364376	0	0	0.137560616	0	0.301621313	0.173859609	0	0.633067503	0.502868594	0.858370139	0.350075335	0.54342805	1.065578374	0.052122532	0.337835636	0	0.691644074	0.38330046	0	0.079721355	0.082711252	0.054028602	0
TCONS_00323599	NONMMUT028393.2	7.844599773	0.662207757	1.404199258	1.818011096	2.381249786	1.077242369	1.321427901	0.505914461	0.826812072	1.063493217	0.951192622	0.925545863	1.033254926	1.184010991	1.842019621	1.864625028	0	2.380536962	2.112850211	1.172619152	1.612674371	2.287919115	9.637927297	3.88417801	1.93213955	3.459291988	1.733836888	1.199569355	4.407746597	0.568882144	3.677520261	0.734821387	1.808594173	2.4759278	1.74312812	1.896934723	0.615782493	2.973793537	1.195793591	2.240713645	1.375739357	2.276809316	0.72010285	2.727531719	1.352126098	0.458778733	2.018106372	0
TCONS_00711833	NONMMUT009770.2	1.006467637	1.673067898	0.429154716	0.385743427	0.927125941	0.47250032	0.323665936	0.153671518	0.408639708	0.096033438	0.134453875	0.123359167	0.128123611	0.216221301	0.245259495	0.094147762	0	0.272320471	0.142041157	0.059708818	0.097171527	0.293611134	0.555613484	0.048959601	0.120412512	0.239505098	3.317022616	0.463483609	2.055960098	0.471451596	1.54025194	2.829246046	0.264091963	0.181321297	0.600373005	0.508206561	0.883374196	1.424756875	0.206837121	0.054737986	2.228447623	1.06757059	1.229901377	0.67221259	1.804277065	0.500636831	0.74553098	0.40154864
TCONS_00224700	NONMMUT022126.2	0	16.7454131	0	0	5.636066912	0	0	0	0	0	0	0	0	0	0	0	1.33850908	0.230932351	0	0.28470022	0.285369188	0.881158038	0	1.091574534	0.626186097	0	0	0	0	0	0	0	0	0.541802771	0	0.533326227	0	0.216839112	0	0	0	0	0	0	0	0.416855095	0	0.319959076
TCONS_00071716	NONMMUT093817.1	0	0	0.061814226	0.073286315	0	0.161518175	0	0	0	0	0	0	0	0	0	0	2.67701816	0	0.200408644	0	0	0	0	0	0.202271821	0	0	0	0.267111874	0.44052337	0	0	0	0	0.293950922	0.421434384	0	0	0.619913466	0	0.681616318	0	0.71057006	0.743872287	0	0	0	1.514046347
TCONS_00499904	NONMMUT105147.1	4.188851707	10.0648957	3.613888453	3.02098061	4.496229002	2.932908254	1.777981241	1.231490657	0.639709364	0.424147682	1.561354713	2.591588779	0	0	0	0.910095033	2.643555433	1.289063572	1.830736688	2.086830035	1.23724134	1.423874094	2.794738431	1.530036685	1.486666254	2.177929538	3.589427656	1.040296534	2.795993546	1.137972879	4.984056111	4.831818031	1.802297586	4.220572032	3.163394899	3.590592154	2.456356364	5.386686246	4.181303312	3.626421376	1.515064233	3.920159684	1.5125246	1.937663329	5.109630438	1.948673592	2.434898446	12.2630715
TCONS_00499902	NONMMUT115959.1	10.17137389	8.423117117	0.993750833	2.243606289	9.989264779	0	0	0	0	0	0	0	0	0	0	0	0	1.737528793	2.165695476	0.176038382	1.176802801	0.969490266	3.541026586	0.35824084	1.124590975	2.616038694	1.62788019	3.915784233	0	0.958433674	3.408625786	0	0	0	0	1.52565967	0	3.460504413	0	0	1.40475495	9.075867891	1.298036822	0	1.692915959	0.681701504	1.176945474	0
TCONS_00380163	NONMMUT059992.2	0	0	0	0	0	0	0	0	0	0	0	0	0	0	0	0	0	0	0	0	0	0	0	0	0	0	7.744278786	0	0	0.93998293	2.43892176	6.265270851	0	0	2.135870474	2.096665395	4.218246917	3.018896073	4.689585929	0	10.61007712	21.07364107	4.680908557	20.64741511	0	4.838695604	2.340897176	0
TCONS_00272290	NONMMUT144060.1	0	0	0	0	0	0.027271959	0	0	0.194544017	0	0	0	0.158962296	0	0	0	0	1.369293493	0.408308303	1.612799493	1.280949281	0.664996058	0	0.297844028	0.119677352	3.671733214	4.238267949	2.646579878	6.389850262	3.486280446	4.714000314	0.183705347	3.337540984	0.759250492	2.837656689	2.080292279	3.641737663	1.449631418	1.585024404	0.810486108	0.375201643	0	1.861534447	0	1.26229084	1.33004324	1.736775263	1.600115339
TCONS_00447113	NONMMUT100983.1	0.109714682	0.662207757	0.549896213	1.131742007	0	0.40907938	0.476102083	2.773992229	9.289476809	2.304988611	4.532153083	6.542120333	5.113287196	8.910170241	0.975186858	5.277836943	0	0.073050136	0.624251199	0.546821475	1.387026981	0.185506955	0.260484522	0.190620178	0.394063325	0	0.770594173	0.059978468	2.804674682	1.630795481	1.693594857	2.571874855	2.947465179	1.43790996	1.728956346	3.510353223	1.676296786	1.022241528	1.617838387	0.882021322	0.250134428	0	1.851693042	0.371936143	3.677782986	1.857922789	3.682158995	22.73565202
TCONS_00528105	NONMMUT139470.1	0	0	0	0	0	0	0	0	0	0	0	0	0	0	0	0	0	0.93416514	1.181755538	1.418556536	1.594271376	2.064460529	2.772336763	0.813072498	1.751272878	0.964532001	0	1.156594782	0.894290556	2.123333641	1.445942901	0	0.721502548	4.483233088	1.201185336	1.478273635	1.626931557	1.855058604	0.334259479	2.962374677	0.508773428	0	0.951701642	0	2.005094833	2.431002966	1.613954017	0
TCONS_00528106	NONMMUT011099.2	0	0	0	0	0	0	0	0	0	0	0	0	0	0	0	0	0	0	0	0	0	0	0	0	0	0	0	0	0	16.76747884	0	17.3544604	0	0	10.0897074	0	0	0	0	0	0	0	0	0	0	0	0	0
TCONS_00219076	NONMMUT090135.1	11.8860498	6.94308278	18.41768368	12.42024245	13.34261099	18.55753156	17.65847177	41.39989731	54.06991044	31.46459008	29.63703592	37.39750555	29.57657783	35.9048373	33.0637646	28.7854017	0	0.382208747	0.651598203	2.178094667	2.502263039	1.636866997	5.460797509	1.811207404	1.415304359	0	0	0.365058944	0	0.91089409	0.170472419	1.055019806	7.068536793	4.429698594	2.64339002	1.697764043	0.64715319	0.772287986	1.58548162	2.822069355	0	0	0.151084436	0.896366106	2.089737926	1.23129658	1.388527995	0.319959076
TCONS_00219079	NONMMUT090135.1	1.212018094	0.477948449	1.351546696	1.13088718	1.235205012	2.08559577	1.406481713	1.438915586	3.462251233	2.067085179	2.310838547	1.740408514	2.208913575	1.866488856	1.678675822	0.655083857	0	0.168349256	0.523722746	0.391587671	0.251091703	0.234944559	0	0.223043479	0.145254111	0	0	0.219491203	0	0	0	0.782033661	0.753372508	0.429211869	0.211442858	0.38799483	0.409084836	0.49684036	0.073189602	0.267341309	0	0.252978813	0	0	0.757947805	0.222900924	0.235835203	0
TCONS_00326188	NONMMUT059503.2	0	0	0	14.42665247	0	3.276521298	11.0105358	15.53928915	31.74053727	18.06962714	28.41285101	17.41818965	9.004710702	25.91822695	7.90231835	14.94645498	0	0	0	0	0	0	0	0	0	0	0	0	0	0	0	0	0	0	0	0	0	0	0	0	0	0	0	0	0	0	0	0
TCONS_00814116	NONMMUT072085.2	33.35617081	41.08701138	12.52636078	0	19.56192796	9.139201532	11.77536988	0	0	0	0	0	0	0	0	0	0	0.555107984	0	0.215699816	0.577315139	1.117694865	0	1.371619403	0.351577865	0	0	3.102746114	0	0	0	0	0	0	0.349050777	0	0	0	0.510955567	0	0	0	0	0	0	0	0	0
TCONS_00814115	NONMMUT072086.2	0	0	0	2.245087186	2.104634442	6.317985584	6.959866369	6.461950551	2.968936242	5.858837308	0	5.877196112	3.95768429	2.124307249	6.179759119	1.771472786	0	0	0	0	0	0	0	1.995417978	0	0	0	0	0	0	0	0	0	0	0	0	0	0	0	0.990186252	0	0	0	0	0	0	0	0
TCONS_00839251	NONMMUT073175.2	0	0	0	0	0	0	0	0	0	0	0	0	0	0	0	0	0	0	0	0	0	0	0	0	0	0.52967865	0.280496279	0	0	0.046098416	0	0	0	0.01766332	0.048240716	0	0	0	0	0	0	0	0.094916414	0.247957429	0	0	0	0
TCONS_00251769	NONMMUT064084.2	4.44750407	3.072975096	8.21551816	8.290744627	2.968169303	8.177455908	8.067327826	2.778324121	6.165926709	2.015266472	2.046910571	12.13161253	1.995029805	21.78468787	4.094159492	4.600820039	0	11.38822401	13.83484714	1.420650221	2.964713762	5.355987731	6.110706391	9.201694663	5.612748108	1.581506902	13.93908534	5.378239212	12.0459442	15.37297804	17.38707385	9.582254593	16.95732687	11.95683392	9.414634973	8.060932585	15.04551628	7.304721123	8.864945443	3.770628041	3.567792421	0	8.847869423	7.197336312	15.16809648	10.13121076	12.60909321	17.26275203
TCONS_00499349	NONMMUT050552.2	0.564372325	0	0.240255547	0.145356609	0	0.160209121	0.163091471	0.909855538	0.332086637	0.808813179	0.254807718	0.254987885	1.195316987	0.50247337	1.144056716	0.586456175	0	0.055643332	0	0.134839753	0.244262752	0.217831542	0	0.141916722	0	0	0	0	0	0.135033658	0	0	0.546024256	0.073086666	0.147414786	0	0.061509829	0.323647863	0.223121016	0.082905523	0	0	0.18266609	0	0	0.06997468	0.047372392	0
TCONS_00280825	NONMMUT096421.1	0	0	0	0	0	0	0	0	0	0	0	0	0	0	0	0	0	0.28176481	0.504202891	0.04561407	0.053091942	0.015458913	0.130242261	0	0	0.203487764	0	0.029989234	0	0.398217501	0.290330547	0	0.427371547	0.29437165	0.099202413	0.293329425	0.171050692	0.247816128	0.070340799	0.533339794	0.750403285	0.252978813	1.063008968	0	0.324510263	0.196619457	0.035405375	0
TCONS_00786647	NONMMUT034071.2	1.034719167	0.557744483	0.794236704	0.181102801	0.428820146	0.232534356	0.342585427	0.048093493	0.077768971	0.150377941	0.427924775	0.030703978	0	0.475328177	0.323816214	0.241247714	0	0	0	0.170103991	0.269302239	0.024626048	0	0.401332914	0	0	0	0	0	0	0.351493515	0	0.354841711	0.046344944	0.12379044	0.952200645	1.744717063	0	0.054760312	0.223925958	0	0	0	0	0.072852554	0.021846606	0.042698882	0
TCONS_00707429	NONMMUT103240.1	0	0	0	0	0	0	0	0	0	0	0	0	0	0	0	0	0	0.027759052	0.2482599	0.044583192	0.016385501	0.178102136	0	0.104102445	0.281224679	0.711189735	0	0.102293277	1.025442486	0	0	2.397722186	0.082160786	0.072754841	0.312799381	0	0	0	0	0	0	0	0.118542645	0	0	0.075785877	0.557528439	0
TCONS_00124458	NONMMUT010053.2	0	0	0	0	0	0	0	0	0	0	0	0	0	0	0	0	0	0.727047133	1.714025724	0.192997693	0	4.900305355	0	0	0	0	0.689489136	0	7.24100225	4.079396969	0.408398303	0	3.172951472	1.752446382	7.694805249	5.538006204	13.7818964	4.532433075	4.072239903	0	0	0	0	0	0	0	0.135354748	0
TCONS_00124459	NONMMUT010053.2	0	0	0	0	0	0	0	0	0	0	0	0	0	0	0	0	0	0	0	0	0	0	0	0	0	0	0	0	0	0	0	0	0	0	0	0	0	0	0	0	0	0	0	0	0	0	0	0
TCONS_00124451	NONMMUT010053.2	0.33402635	0	0.453674195	0.348167185	0.864120414	0	0.270861257	0.476444944	0	0	0.410131878	0	0	0.355760479	0	0	18.40583836	0.768174359	1.367566309	0.804258166	0.518057896	0.658271431	0.55131549	0.143864622	0.161974747	0	0	0	0.90697837	0.771252486	0.35381616	0	0.708887045	0.710055253	0.124739949	0.230823591	0.377782559	0	0.339183335	0.208495392	0	0	0	0	0.485900034	0.503520583	0	0
TCONS_00124456	NONMMUT010053.2	0.877827172	1.345275058	2.048196461	0.585953404	1.636191861	4.740316409	1.108740934	0.46854003	0	2.246204024	5.192784336	1.549625343	3.426617752	5.047734857	2.196662575	0.43543735	0	7.273142873	6.223256238	13.16668387	17.61393527	12.86265035	0	6.129207154	3.640226001	2.705776798	0	0	0	11.93518532	0	4.399743055	34.49134966	20.32290036	18.78559254	28.1966376	21.53148486	11.31791746	8.047022627	15.32641363	0	0.62232788	11.3028372	2.367745489	10.61240506	12.85100402	13.27818399	14.96064647
TCONS_00124454	NONMMUT010053.2	0	0	0	0	0	0	0	0	0	0	0	0	0	0	0	0	0	0	0	3.271281477	5.362087034	0	0	1.7363592	2.306900628	0	0	3.102716125	0	0	0	0	0	0.125685242	0	0	0	0	0	4.377290833	0	0	0	0	0	0	0	0
TCONS_00355653	NONMMUT075201.1	0	0	0	0	0	0	0	0	0	0	0	0	0	0	0	0	0	0	0	0	0	0	0	0	0	0	0	0	0	0	0	0	0	0	0	0	0	0	0	0	0	0	0	0	0	0	0	0
TCONS_00256649	NONMMUT044546.2	0	6.53416949	140.9532171	91.08316257	152.8595675	201.1915937	31.46976352	88.47533277	87.78667447	27.57377356	0	12.93526802	6.693451902	21.32360265	110.3784207	0	0	0	0	0	0	0	0	0	6.358816717	0	0	0	0	0	25.72178642	43.08037346	19.12336772	0	0	15.46710056	0	5.404095329	0	0	0	27.88205986	8.364851864	31.23606518	0	0	0	0
TCONS_00620836	NONMMUT150254.1	62.17975381	14.94867791	24.97538259	24.37554362	21.90562426	31.8363028	22.54294123	24.74822874	37.69300055	24.39204114	43.63764013	34.59143158	34.11905791	26.86291101	41.28632348	34.16062579	1017.198637	9.427620971	9.99078029	12.22838419	9.263488653	26.31110074	15.48111608	9.774728702	59.7079026	36.88602349	58.14556859	16.73591181	41.19145572	37.77872366	67.86476535	70.23826969	12.00357254	6.764983485	61.10079292	81.64939199	36.37789814	232.4980866	15.25547741	7.6382414	30.50226768	35.90933057	31.84339379	274.1517758	79.04615703	18.64328214	34.06145773	293.3068049
TCONS_00178035	NONMMUT013638.2	0	0	0	0.050531077	0	0	0	0	0	0	0	0	0	0	0	0	0	0	0	0.054340042	0	0	0	0	0	0	0	0	0	0	0	0	0.61420007	0.690349931	0.052109611	0	0	0	0	0.009526905	0	0	0	0	0	0	0	0
TCONS_00355784	NONMMUT037053.2	12.67204579	2.317727149	2.838073273	16.19268772	2.186065378	0.763614844	1.426303132	2.687670574	12.01309305	3.030955669	6.382334639	6.720267791	6.040063877	16.75027314	0.650287103	13.87140384	5.354036321	2.16019688	2.283462865	3.151708753	5.026220773	3.067403883	16.67100938	5.410032965	4.544371294	2.238365404	0.770594173	1.890401346	1.068447498	3.811927548	11.03256078	17.2683026	11.70748409	11.10081804	7.108575674	6.613778536	9.508229054	9.842977816	5.240389559	6.636883481	9.380041069	2.529788129	2.774281955	1.487744574	19.13193526	6.524729294	13.08933172	58.48020015
TCONS_00169008	NONMMUT056424.2	0	0	0	0	0	0	0	0	0	0	0	0	0.318030567	0.039890723	0	0	8.0337315	6.545751361	5.199604321	16.26044907	20.75671941	5.78548271	4.632326489	22.69656675	5.489890758	3.436501358	0.469677148	5.925392784	2.781302393	2.636636	5.696140166	1.714705707	9.390146518	9.46707155	5.18168217	2.535352882	3.936765898	2.724118788	1.328737702	3.025741702	1.02942824	1.690657406	0.609549917	1.801410722	2.766558166	3.374536047	1.650740202	0
TCONS_00621296	NONMMUT079531.1	9.764606711	4.758293838	2.399727435	8.625607824	3.67914803	2.380037472	1.842416583	5.107111625	9.199257021	6.130293951	9.915287848	16.29787675	5.219341541	19.85067556	8.234911245	22.32068352	3.164235466	2.64185817	2.951675754	2.616851848	4.451454047	2.708710726	8.59598921	5.887208882	2.671848163	0.849561415	2.810934893	1.533349528	2.645876673	1.283587745	4.889118022	1.721502805	3.486441128	4.897597898	5.331066832	3.944987432	2.85042295	2.677033724	2.605950768	3.835560371	0.258889133	1.050873989	0.214487777	0.387185525	4.131394249	0.545859306	2.840714854	0
TCONS_00786003	NONMMUT011099.2	0	0	0	0	0	0	0	0	0	0	0	0	0	0	0	0	0	0.632718535	0	0	0	19.4914786	0	0	1.405148881	0	0	0	0	0	5.205336376	33.83136037	0	0	0	6.198184074	5.43424629	7.916548167	2.651812969	0	0	0	0	26.14153184	13.77594745	4.329560443	0	0
TCONS_00805768	NONMMUT022236.2	1.684504372	3.742963794	2.900250823	4.69284047	2.269799489	1.758523169	3.909622734	3.748130524	2.753673288	0.973840739	1.528174877	2.906596302	2.709618314	3.327906657	0.535702647	1.063484144	0	0.59131998	1.240891335	2.149038504	3.698218758	1.576499942	0	0.412960745	0.995698468	0	0	2.66763232	0	5.416004531	3.168522424	7.681087959	6.721688622	7.142541204	3.837602843	6.543859468	7.386789945	4.543739686	2.673653787	5.053279933	1.089960772	0	3.999588389	2.875314346	5.665624689	2.369111531	5.882496833	23.59154255
TCONS_00805767	NONMMUT096791.1	7.860727831	1.720250201	9.367285597	24.58474733	4.913923637	4.609874631	12.02872746	11.93822163	6.835547215	2.233362343	3.675408293	7.355011168	5.450446226	6.596891355	1.793910402	3.771899403	9.519476579	9.121645258	9.452027496	14.08656914	21.80738903	14.39942088	21.49101496	3.584797107	8.001986753	9.031193942	15.62090712	14.44200532	14.9657441	17.93328902	20.95383301	40.15853992	24.48567082	19.94501082	22.863577	38.32458265	29.88727698	32.7477242	17.41782393	16.81193535	20.45574343	13.12858847	23.07782183	11.28305485	33.14466703	17.83899933	28.64478942	71.04435314
TCONS_00621299	NONMMUT079531.1	0	0.20826434	0.075875858	0	0.14646638	0.074438811	0.11283526	0	0	0	0	0	0	0	0	0	1.139071227	0.28019945	0.560241441	0.056848816	0.075443649	0.448169345	0	0	0.39266139	0.574852933	1.619981599	0.236015271	1.09368957	0.634322554	1.304600313	1.585193437	0	0.105307761	0.29512718	0.936067527	1.015322701	1.629019318	0.27802201	0.113671306	0.616581366	1.984871766	0.43768537	0.389541121	0.465834483	0.524624405	0.629047297	0
TCONS_00463460	NONMMUT050561.2	0	6.877689764	0	0.799238613	0	0	0	2.215431044	9.916686719	7.813910063	11.2799695	4.151435368	0	4.520867378	0	4.030023554	0	0	0	0	0	0	0	0	0	0	0	0	0	0	0	0	0	0	0	0	0	0	0	0	0	0	0	0	0	0	0	0
TCONS_00551517	NONMMUT131181.1	25.95213034	33.65753701	13.56523257	13.74492239	23.91614078	24.94170619	22.75918347	8.798548109	12.38287259	7.820503721	9.419268872	14.96597601	5.714058701	10.24857278	4.776627762	13.64719058	33.88435737	21.95464442	25.80145451	22.38419731	12.45013337	24.40257427	13.52266321	21.35989637	16.66780668	58.14703554	65.64036751	44.94948314	71.11199234	14.38938081	71.45968657	32.83163587	15.26062736	18.99950419	38.83632763	31.30851614	28.67572492	23.21507413	33.61832999	6.311610011	40.81280882	56.77603497	35.33205206	43.59885065	49.8732252	32.8845168	24.76652005	32.42945214
TCONS_00551515	NONMMUT083767.1	28.46986287	9.041619162	11.96863837	20.86562638	9.786194921	12.76888106	6.663163855	8.630110213	8.965463748	14.73363503	8.086815865	8.451078797	6.43484674	7.538145269	3.638151282	9.651314946	1.519207806	0	0.717408685	0.496969858	0.480316162	0.321792732	2.447512564	0.317674483	0.018635473	0	0	0	0	0.929629275	0	0	0.366318469	0	0.015348031	0	0	0	0	0.018640632	0	0	0	0.274612853	0	0	0.040043479	0
TCONS_00206343	NONMMUT046750.2	0.786215412	0	0.1299228	0.038250472	0.919865081	0.396029748	0.279702239	0	0	0.144448966	0	0	0.066870139	0	0	0.159409638	0	0.127096801	0.048043333	0.007754392	0.088364901	0.015536208	0	0.046469625	0.302920473	0	0	0.123045827	0	0	0	0	0.601480368	1.419795698	0.753669077	0.146931375	0	0	0.388351554	0.03123458	3.591930393	0	0.946318016	0	0	0.535067082	0	0
TCONS_00554102	NONMMUT116372.1	12.35848123	6.45652563	9.07709751	19.93231246	8.607007834	7.840415406	9.050973585	6.300152783	12.77478151	12.15785446	16.02490997	15.9528091	8.547429163	16.92992939	6.163668536	9.495918992	0	1.184841899	1.178850369	0.764259187	0.58861045	2.720969644	2.083876172	1.231412306	1.459345624	2.4662717	1.348539802	0.299892339	2.306511036	1.156727027	2.567780134	0.55111604	0.372153604	1.18030286	0.690930637	0.373328359	1.505314514	0.402701208	0.738578394	2.100559292	0.375201643	2.276809316	2.368246819	2.231616861	2.812422283	0.699091403	0.640377017	0.959877228
TCONS_00704352	NONMMUT152881.1	6.473166246	4.469902359	5.823037572	11.89281456	2.615471077	3.832419268	5.474382145	5.280893242	3.161340275	3.243654312	3.133340403	3.702183454	2.198978431	3.03444605	5.417704767	4.345524429	0	0.156536006	0.048019323	1.022037983	1.154749736	0	0.130242261	0.345499072	0.153870881	0	0	0	0	0.037925476	0.726745747	0.918526734	4.331694686	3.786212616	0.779447533	1.359981878	2.018398171	0.216839112	0.070340799	1.581227782	0.500268857	0	0.171453059	0.371936143	0.216340176	0.021846606	0.424864499	0
TCONS_00101510	NONMMUT121518.1	52.28721978	110.9312224	59.5682732	49.75726608	53.36646222	65.25203381	44.94142733	22.31066963	22.34026764	24.39977805	35.00909209	36.79676593	17.98939215	30.5914835	23.83920122	26.43289279	36.88797174	16.15143726	26.01610088	22.83896503	19.08490061	23.99756621	27.65720456	15.67028913	14.30380286	33.94521833	20.46197236	14.62739876	24.56307375	23.77925467	42.15599542	31.4205951	26.54127579	28.56941608	29.10462757	50.86254891	33.39484248	30.0337349	19.38184456	14.61207854	26.13767204	28.29213852	29.45467547	29.66178346	28.94858707	32.22520807	25.58201205	21.45069637
TCONS_00191326	NONMMUT090143.1	0.168466894	0	0.117137713	0.387573478	0.090955934	0.283846546	0.086836691	0.233005229	0.594040156	1.017523723	0.3715806	0.633656867	0.402783965	1.188468444	0.177484008	0.38879012	0	1.152418075	0.240120625	0.832890118	0.731082676	0.664315866	0	0.667891405	0.067942542	0	0	0	0	1.76154356	0	0	0.330913191	1.163805183	0.384990394	0.128131626	0	0.071959608	0	0.452182327	0	0.520883376	0.302031709	0	0	2.252232187	0	0.995072726
TCONS_00191327	NONMMUT000238.2	244.4037174	59.72335874	187.2718491	221.6728741	229.9581116	286.0992236	81.9461699	147.9305583	354.8383651	167.8257701	489.2032336	233.518501	235.0823456	481.0129795	255.2236832	332.3282156	107.0793879	150.8350062	191.0091501	153.5845409	162.3302647	138.6608375	335.5848139	225.9196512	191.5215633	260.7475929	103.8090528	152.3929009	92.31186049	133.8435379	129.0768965	117.5534188	73.22323491	129.5784302	112.0340896	96.95540137	101.2046396	100.4022087	60.81317333	133.7786369	50.86371043	95.62219658	88.49189611	107.9496305	103.8688124	126.1641079	73.47865113	187.9417215
TCONS_00191329	NONMMUT148409.1	0.335288069	10.04204953	0.287782291	0.019263694	70.31557361	0.043103331	0.655711402	0	0	0.090210812	0	0.134043186	2.089347434	0.545341533	26.82468161	0.528510582	0	0.026423278	0.065498357	0.372475376	0.218300792	0	0	0.219695712	0.241679863	0	0	0	0	0.418924811	0	0	0.044656646	0.19558128	0	0.148718018	0	0	0	0.029486524	0	0.899845637	0	0.604272254	0	0.607073497	0.555439522	0
TCONS_00796395	NONMMUT045070.2	0.965653775	0.290543653	1.048681537	2.282061438	1.709229867	1.042879701	0.523096674	1.66872723	1.882067456	1.252316438	2.253263417	3.020076273	2.742232079	3.422192238	0.499891619	0.955462308	0	1.051838473	0.629605353	2.39281378	2.555646987	0.930781148	4.244986005	0.267892832	0.764430534	0	0	0.911162893	0	1.885502979	2.240480831	2.374759018	3.975967285	2.825748321	2.724367533	2.860921877	0.413634785	1.630444261	1.72542464	1.936837967	0	0	1.243103262	0	2.240472944	1.227582657	3.584758809	23.30837877
TCONS_00206509	NONMMUT056424.2	0.056338489	0.196675704	0.218151683	0.298226059	0	0.136414337	0.205282776	0.070954503	0.181023208	0.13524975	0.207527849	0.27410242	0.192291391	0.403573629	0.313360044	0.25256188	0	0.616960578	1.477818674	0.113688509	0.224778009	1.342606589	0.933185798	2.162157022	0.906419164	0.516451945	0	0.67718689	0	0.716658763	0.119858127	1.259483857	0.078766881	0.378970104	0.276519641	0.192077441	0	0.911746512	0.305173558	0.31147972	1.393874103	0.85026179	1.932070236	0	1.443692077	0.899949101	0	0
TCONS_00609193	NONMMUT123094.1	59.97887729	58.70720093	30.84205836	28.80787875	36.33611508	31.74971433	22.43110229	7.399631385	13.07525474	7.857034713	13.68010825	12.28768773	6.091859092	4.813875274	8.257828136	2.449026955	1.33850908	1.10918283	4.128941486	1.607480892	4.086725679	2.354871667	5.07944817	8.019027511	2.240599375	3.662779752	3.66032232	3.02894261	1.074323959	1.422205361	1.463072403	2.571874855	1.36202771	5.29850251	2.366686146	0.346662047	0.478941939	0.991295489	2.004712784	4.46113395	0.125442416	0	0.651555916	0.247957429	1.730721405	0.371392308	0.460269874	0
TCONS_00379591	NONMMUT059992.2	0	0	0	0	0	0	0	0	0	0	0	0	0.155253176	0	0	0	0	10.53017711	6.330675464	0	0	24.41800227	14.39007667	1.397341213	0	0	0	21.54666475	0	0	0	0	0	0	0	0	0	0	0	0	0	0	4.257693825	0	0	0	0	0
TCONS_00174800	NONMMUT132595.1	0	0	0	0	0	0	0	0	0	0	0	0.020120562	0	0	0	0	2.67701816	2.149771582	5.786328419	4.465822752	6.782528756	7.99725122	3.907267823	4.131424294	4.684564763	0	0.385297086	4.98061196	0.934891561	2.711671555	0.338718971	0.55111604	2.419028199	6.721812153	3.727176386	3.01329318	4.036796343	1.951552009	1.160623191	3.758471107	0.125067214	0.505957626	3.840548531	0.247957429	0.216340176	5.636424434	1.876484873	0
TCONS_00174801	NONMMUT088800.1	0	0	0.012441402	0.045245601	0	0.442787521	0.069416915	0.036931756	0.186616348	0.030814716	0	0.068611117	0.032984676	0.226407278	0	0.062180504	19.13131028	4.640802092	5.810818273	3.442908978	4.136101185	15.87856059	4.532951644	24.15307171	8.892437539	3.175223069	8.326847981	7.946787103	1.01809691	0.638020288	1.261486226	0	2.05705631	5.471051705	0.415459707	1.448034038	0.336319872	0.255281589	0.056659514	3.734085727	0	0	5.470381314	2.418576762	1.28062567	3.684473852	0.670365369	0
TCONS_00174802	NONMMUT088800.1	0	0	0	0	0	0	0	0	0	0	0	0	0	0	0	0	23.81743057	5.436078052	8.042516309	5.73801742	4.876906323	3.826668392	6.530477197	11.52695107	5.580093288	4.655189577	5.38067381	3.159755648	5.442137331	1.766037729	0.774214792	0	2.119396988	5.335820102	1.590611495	1.090572134	0.6397638	2.899603584	1.258010028	1.941875547	0.606450922	1.243643844	2.471838758	2.837004924	0.478652639	1.756357916	0.316063782	0
TCONS_00811165	NONMMUT001753.2	73.89448414	39.71160587	22.05816355	35.52674209	29.34355556	18.49379699	18.52011618	11.84152873	20.09756421	11.36608376	17.3122093	20.93779912	10.14555661	17.52296219	12.90881932	24.34917432	132.449489	10.49944387	14.94200466	11.19903427	6.666217584	14.22420957	11.86311632	10.98115189	9.91781599	66.95520689	60.40456541	26.79484065	36.3421732	13.06746937	73.25731654	49.99100119	12.07327412	14.05078817	16.60678159	23.89960153	21.4455832	17.54302762	23.21548847	3.57229521	44.40498935	78.81656107	26.24905191	37.32180834	31.1627206	25.81635317	24.45909518	18.07480816
TCONS_00812880	NONMMUT149856.1	0	0	0	0	0	0	0	0	0	0	0	0	0	0.042850751	0	0	0	0.180319043	0.071548791	0.545462176	0.60654889	0.293719346	1.384605474	0.748910937	0.401312353	8.505788535	2.505009007	0.569045713	0.133555937	0	0	0	0.155978223	0.270293039	0.495459367	0.239996802	0.099756764	0.12322657	0.105511199	0.179366425	0	0	0.068581224	0	0	0	0	0
TCONS_00787044	NONMMUT011099.2	0	0	0.028368753	0	0	0	0	0	0	0.043257587	0	0	0	0.072816676	0	0	24.19355163	0.605794342	0.578872938	0.46835159	0.309871119	1.555243937	1.64821581	0.511320756	2.266415489	0.640782969	0	1.669260735	0.617429098	7.73171515	1.399877121	0.990355524	0.687340213	1.221993741	0.781828391	0.384288213	0.331359402	0.335326198	1.041501047	0.18520652	0	0	0.79972565	0	0.345116665	0.960879286	0.767517718	0
TCONS_00253062	NONMMUT022482.2	0	0	0.098195752	0.276915597	0.23422129	0.040907938	0.10487523	0	0	0	0	0.321928996	0	0	0	0	0	0	0	0	0	0	0	0.023827522	0	0	0	0	0	0.018962738	0	1.285937427	0.007442774	0.187183545	0	0	0	0	0.0351704	0.007945709	0	0	0.171453059	0	0	0	0	0
TCONS_00750647	NONMMUT008300.2	18.81239255	16.41877913	13.68793798	18.50800311	13.0152477	9.773520019	11.34267565	9.000660936	12.65888191	9.10238527	12.00584137	14.12280373	9.117706401	13.74133556	7.457253903	14.57278728	64.88556617	30.21030119	45.68995364	92.81754932	110.5486254	54.57106027	41.03985734	19.14801131	23.27898874	36.35349601	44.20532736	35.76495038	45.44214054	84.72532442	98.46947607	69.63204205	139.3242781	112.9034308	89.61299785	111.3159033	103.5887441	85.6018241	54.15636627	81.25761471	50.89660311	48.75610065	45.07785545	34.65725781	106.3946922	73.14986585	106.2699764	637.7849847
TCONS_00474665	NONMMUT111964.1	0	0	0.010418569	0.012665879	0	0.029085544	0.012931116	0.033074158	0.05135962	0	0	0	0.028003858	0.054969451	0	0	3.125418702	0.584307167	0.892487137	0.796257458	0.459796126	0.930162792	1.208387695	0.876078423	0.780997299	0.53598677	0	0.458085547	0.581769663	0.309035744	0.057485448	0	0.393484596	0.470094457	0.218741321	0.567832433	0.362695888	0.392323908	0.196004638	0.23684568	1.386620204	1.610210144	0.956776653	0.359910208	0.302659906	0.676982637	0.087026412	0
TCONS_00124700	NONMMUT017298.2	0	0	0	0	0	0	0.03425225	0	0	0	0.074640645	0	0.046655434	0.028398852	0	0	0	0	0	0	0	0	0	0	0	0	0	0	0	2.011870667	0	0	0	0	0	0	3.812685726	0	0.860795533	0	0	0	4.563600374	0	0	3.072157169	0	0
TCONS_00833273	NONMMUT031618.2	0	0	0	0	0	0	0	0	0	0	0	0	0	0	0	0	0	0	0	0	0	0	0	0	0	0	0	0.154174651	0	0	0.220167331	0	0	0	0.217522549	0.385114868	0.282986266	0.561644277	0.222417608	0	1.396375447	0.515570821	0	0	0	0.185608767	0	0
TCONS_00833272	NONMMUT031618.2	0	0	0	0	0.078073763	0	0	0	0	0.102999318	0	0	0	0	0	0	0	1.38084585	0.190012461	0.959086005	0.806041861	0	0	1.380518983	1.076668744	0	0.192648543	0	0	0.829657719	2.237722691	1.143933194	3.851576196	2.847835979	2.171455797	0.587912166	4.719699128	2.011585466	1.376569445	0.517503997	0.72639038	0	0	0	9.913950803	3.08270908	6.502692786	21.73290028
TCONS_00833274	NONMMUT009005.2	0.569528915	0	0	0	0.282080507	0.403352269	0.108608788	0	0	0	0	0	0	0	0.460450728	0	0	0	0	0.061469521	0	0	0	0.358455287	0.337353357	0	0	0	0	0	2.064346966	0	2.692341759	0.500239516	0	0.52505967	0.197255659	0	0	0	0	0	0	0	0.762328694	0	0.249183029	0
TCONS_00816951	NONMMUT072113.2	0	4.050062642	0.086392623	0.186761511	0.101886261	0.033435421	0.257961604	0	0	0.282118163	1.061866682	0.105431746	0.21716899	0.130119326	0.434012329	0	0	0	0	0	0	0	0	0	0	0	0	0	0	0	0	0	0	0	0	0	0	0	0	0	0	0	0	0	0	0	0	0
TCONS_00450070	NONMMUT110358.1	0	0	0	0	0	0	0	0	0	0	0	0	0	0	0	0	0	0	0	0	0	0	0	0	0	0	0	0	0	0	0	0	0	0	0	0	0	0	0	0	0	0	0	0	0	0	0	0
TCONS_00450071	NONMMUT108523.1	0	0	0	0	0.289497515	0	0	0	0	0	0	0	0.029381531	0.147844667	0	0.090544927	0	0.455968513	0.985836701	0.075514093	0	0.480602144	0.705522327	0.008679175	0.179738285	0	0	0.240093806	0	0	1.136547314	2.375126428	0.678669381	0.67166561	0	0.137624833	0.467515753	0.524843582	0.883691463	1.030407429	0.514651587	0.797642197	0.284646369	0	2.452756741	1.005992528	2.166207056	0.326358257
TCONS_00378174	NONMMUT080135.1	0	0	0.496772311	0.787535919	0.101222634	0	0.186415722	0	0.586890663	0	0.46395819	1.945034632	1.842320026	0.809898342	0.701701121	0.459788088	0	4.641657823	4.476121191	2.904316281	0.979367142	3.620817507	10.29044102	4.095635356	7.796107515	0	12.86911533	10.4888545	0	3.405366442	4.15913025	0	4.742699572	3.802182776	3.724441233	2.638551507	3.654600676	5.448578324	6.012415003	4.759535034	0	7.771509131	0	0	7.627830082	8.364694173	5.574080612	0
TCONS_00270074	NONMMUT056424.2	0	0	0	0	0	0	0	0	0	0	0	0	0	0	0	0	0	0	9.568954547	2.831082891	3.328121468	10.43028315	4.156942237	4.068787695	5.24491122	0	4.025391309	2.318767562	0	0	0	0	1.685207859	4.208856044	0	3.71699047	0	2.465212888	0	1.414073911	0	0	9.203223034	11.49530641	0	5.369895837	0	0
TCONS_00814371	NONMMUT057411.2	19.2036351	10.5643659	3.539691743	2.613950801	5.254208135	0.32595445	0	0	0	0	0	0	0	0	0	0	0	0	0	0	0	0	0	0	0	15.06073988	8.775333789	6.007623263	8.353122539	0	8.545153823	12.93744905	0	0	0	0	1.867223569	1.594541899	0	0	8.31596921	0	0	0	0	0	0	0
TCONS_00326603	NONMMUT117023.1	0	0	0	0	0	0	0	0	0	0	0	0	0	0	0	0	0	0	0	0	0	0	0	0	0	0	0	0	0	2.264359525	0	0	0	0	0	0	1.330705967	1.198438796	0	0.068658867	0	0	2.548992635	3.647577759	0.756649764	1.709802798	0	0
TCONS_00246118	NONMMUT066124.2	2.02972162	0.165551939	0.490978762	3.922088044	0.117110645	0.177267732	0.388038352	0.031619654	0.34045203	0.132936652	0.111905014	0.100602811	0.238443444	0.419557777	0.216708191	0.207716068	0	3.318657244	3.275494059	8.306910634	8.291507927	4.823273591	6.386819983	2.689585183	2.308114498	2.441853168	5.394159208	2.90952548	2.003339059	10.18930498	8.751724007	16.83843208	10.30457322	5.067679674	7.165673749	14.67260448	8.954709013	6.583328374	5.09970796	6.666465354	2.876545928	2.023830503	4.286326486	3.600465848	11.89870966	6.587319822	8.320369331	0.959877228
TCONS_00811760	NONMMUT104400.1	0	0	0.009819575	0.012039809	0	0	0.010487523	0	0	0.053174661	0	0	0.026493716	0	0	0.015801907	4.015527241	3.404125904	5.642294459	4.474799601	4.061540189	4.249871592	9.361683461	2.035823499	2.603939814	0	2.120097217	1.445690997	1.227913287	3.00153597	9.75994522	4.225222976	4.192953929	3.755310314	4.277579718	5.512113216	2.301487068	3.156619886	1.441986389	2.116498383	0.987280589	1.264894064	3.120445682	7.314992112	4.065897261	1.879266923	4.14242887	0
TCONS_00710628	NONMMUT075201.1	219.9715742	37.14571637	132.8699785	81.43477301	113.7408254	208.3474693	60.92815646	83.89228528	171.1671701	78.46104662	231.2630706	133.8324429	141.4964729	251.8147959	67.26540973	159.0491807	101.0761747	33.42380798	71.11575298	75.62749918	103.5274019	55.61775234	102.5407738	113.3697364	69.17850142	16.7566069	45.19188055	60.31854564	30.82951833	71.9809801	107.5667902	38.0345387	72.59373249	101.2236541	67.37470783	79.66472511	47.16237062	45.2467643	14.90887313	80.10307148	28.64239314	13.98694558	21.61018365	59.45795985	72.30029176	47.07310113	23.06568124	146.2356959
TCONS_00394318	NONMMUT064966.2	0.118766143	0	0.009819575	0.157035223	0	0.040907938	0.010487523	0	0	0	0.111905014	0	0	0	0	0.015801907	0	0.98423579	0.144057969	0.124462552	0.006676312	0.636876295	0.154076594	0.184550117	0.371649467	0.241743464	0	0.230737165	0.156394003	0.022319143	2.142494271	0	0.516699725	0.453026721	0.484646304	0.031146252	1.244564839	0.534973067	0.222171415	0.528047952	0.47275407	0	1.854984941	3.036238718	1.685614478	1.068058737	1.497187091	0.319959076
TCONS_00483736	NONMMUT044096.2	0	0	0	0	0.039036882	0	0	0	0	0.031692098	0	0	0	0	0.054177048	0	0	0.102009297	0	0	0	0	0	0	0	0	0	0	0	0	1.906697479	3.138789555	0	0	0	0	0.261057567	0.524812605	0.653114323	0.078416198	1.0734519	0	0	0.362141825	1.6378033	0.231202635	0	1.763614427
TCONS_00833783	NONMMUT154407.1	0.375004784	0.331103878	0.183468944	0.911124554	0.91237	0.5254761	0.127098292	1.668442653	2.145188239	0.643307047	2.478472259	1.835981185	0.915172433	2.823413503	0.204084939	2.902083431	0	0.374037568	0.839737911	0.408045228	0.856100926	0.134739885	0	0.355578114	0.208084721	0	0	0.029989234	0.133555937	0.108447899	0.053953093	0	0.796369415	0.326950095	1.403402369	0.09130545	0.177584829	0	0.2798157	0.103683551	0	0	0	0.180141072	0	0.282804319	0.038981318	5.922122537
TCONS_00278550	NONMMUT023055.2	0	0	0	0.094620856	0	0.04079885	0	0	0	0	0.337169808	0	0.240774891	0.232780043	0	0	0	0.015017021	0	0.069867072	0.22460546	0.234264367	0	0	0	0	0	0	0	0	0	0	2.509629091	2.006369369	1.418311075	0.954360616	0.082275383	0.434700466	0	0	0	0.281059461	0.099134159	0.392268653	0	0.811557732	0	0.610161958
TCONS_00495647	NONMMUT075201.1	16.72945931	0	0.919367551	3.063360736	0	3.577344638	2.966679051	8.038411631	14.0147078	4.494003287	20.37711979	12.14853392	9.672405334	28.43700139	3.935962513	14.64182581	13.06920266	2.554218878	4.458354042	5.223814566	3.520938128	0	1.494529942	6.638663407	2.594092078	1.444966612	0	0	0	6.302721129	1.658851968	0	3.04745141	7.651067846	1.481942337	0	0	0.377578848	0	5.301726347	1.591480301	0	0	0	2.618905996	0	0	0
TCONS_00119549	NONMMUT121450.1	0	0	0	0.018372748	0	0	0.032878385	0	0	0.030495668	0	0	0	0	0	0	0	0.644458736	0.207995697	0.502958985	0.500033181	0.185553332	0	0.242689271	0.520442608	0	0	0.353543078	0.588581015	0.571650704	1.050028811	1.296041221	0.425019631	0.51880472	0.800195009	0.419087749	0.872871684	0.94520169	1.284493339	0.434185297	1.278687198	1.688127618	0.398799816	0.923517444	1.020692949	0.313913886	0.105897476	0
TCONS_00518791	NONMMUT139470.1	0	0	0.020149768	0	0	0.018776744	0	0	0	0	0	0	0	0	0	0	0	51.8959437	63.682914	17.40902048	23.81768886	28.11265154	100.5043058	41.46378447	25.09391287	24.96245447	10.16972394	22.04112724	38.88000312	13.94106376	23.63963251	4.673280316	9.810596285	14.76119226	22.8839135	18.23783697	14.41362081	23.45087118	25.88214335	14.39493027	23.60693696	25.32393811	8.437033602	12.9753643	15.52808653	21.34784831	10.79254964	24.79234896
TCONS_00051193	NONMMUT065964.2	154.5370795	149.0510464	104.5079029	123.7851489	111.8544072	94.98171415	90.01061366	59.00698534	80.98502655	63.53938599	75.00629424	85.48504571	52.91730322	72.9275725	41.24460715	78.34655027	211.4978198	109.5143324	139.7005515	141.110753	85.96353894	141.1368298	85.13728199	91.31825815	104.1056697	325.0566449	300.5716056	195.79395	340.4013628	119.8683033	344.7384914	286.7414505	127.4884731	131.8094028	173.6166661	225.3967565	215.3608612	208.3532064	161.8516121	58.79613756	212.9501948	294.6353161	157.9344315	188.6763868	203.0876632	202.7630723	199.7842106	154.2826666
TCONS_00185128	NONMMUT142871.1	1.732559403	0	1.920463426	2.226931155	2.472439942	4.287015548	2.160272431	3.173443316	3.195288206	1.455656341	2.110416667	2.897501808	2.288553685	1.804328279	1.338173077	2.699929635	0	0.105213067	0.071404733	0.414289794	0.685383787	0.607380689	0	0.295282569	0.051290294	0	0.192648543	0.313657397	0	0.200189627	1.273293002	0.884173834	1.989349391	0.598621485	0.860651794	0.491113456	1.679991481	0.073725298	0	0.360941756	0.423102386	0.252978813	0.778259727	0.29990451	0	0.058570752	0.216503868	0
TCONS_00493524	NONMMUT098030.1	1.865149596	0.662207757	0.41242216	4.310263512	1.132069571	0.736342885	0.325113214	0.063239308	0	0.132936652	0	0.100602811	0.052987432	0.069647705	0	0.110613349	4.015527241	5.6881532	4.68188399	3.854512103	3.37776907	3.572972171	13.28549205	0.953112803	2.872735145	3.662779752	16.72536122	12.16996098	7.879800298	12.46238736	19.35541818	66.3078938	8.181201791	5.004590311	8.820866015	25.4129947	27.68527299	21.77863893	15.72120385	8.178478069	37.6863786	25.04490247	11.62451743	20.70543715	40.29335771	16.1570728	24.7839395	96.64427881
TCONS_00682199	NONMMUT037327.2	2.468580348	0.331103878	0.707009417	10.51599021	0.470472499	0.286355566	0.503411593	1.644221998	6.809916041	2.180240857	2.853577867	3.561339518	4.291981999	8.062331311	0.216708191	3.286891471	12.04658172	4.302339941	7.517857186	13.07688801	10.78023252	9.567691268	8.497786546	3.105738816	6.038543028	1.831389876	11.37300675	9.174396392	9.883139356	19.82836818	22.64578266	43.72187253	27.92366693	14.42170938	21.24049798	40.26893007	45.66294025	26.8377742	15.79150948	17.53382681	10.63696657	16.19064402	17.55185544	11.90195659	35.10616932	25.71186085	29.34843584	97.17605079
TCONS_00693192	NONMMUT022630.2	2.324415256	0	1.289781568	0.737353997	1.944192858	1.145681349	1.394463012	2.240631908	5.67270899	2.337637853	6.27546535	3.968901627	4.712596235	7.136069066	1.180788754	3.1354934	0	1.521112547	2.01786799	3.036907261	4.1177181	0.123686762	0	5.661085696	0.123216382	1.974034799	0	1.394169493	0	4.328548386	0	0.432809797	2.848156241	4.482365237	2.947332043	0	2.914430119	0	0	4.392602214	0.813687296	0	2.386489425	0	0	8.438120617	0	0.818135357
TCONS_00320139	NONMMUT112143.1	1.652632257	0.165551939	0.390141544	2.964044355	0.449509693	0.204921498	0.054807795	0.767440618	3.368918741	1.679468488	2.204528784	2.871848091	1.091885519	5.374191064	0.270451822	1.918477927	0	2.644957583	2.521014456	2.849957993	4.931252562	2.241109527	1.562907129	2.231655947	1.690733235	3.255804224	0.385297086	3.055812963	2.253355773	5.755532357	7.020386179	24.43281112	7.600717489	5.410633962	5.919167082	8.713190561	9.11443615	6.577256879	7.518622542	2.032663212	12.88192307	6.474486758	2.400342832	1.239787145	15.94951719	5.545739171	11.50841091	5.439304291
TCONS_00666213	NONMMUT108496.1	0.430355841	0	0.166952418	0.6302599	0.156147527	0.129337264	0.204307436	0.314805273	1.680665762	1.355555042	0.493333256	1.741635868	0.631663178	1.277129973	0.799219807	1.219844014	2.67701816	0.703900675	0.921778924	3.641809132	4.111897896	2.010663512	1.365199377	4.260492025	1.673414213	0	0.719542309	1.689323533	0.157996674	0.7066654	0.561692831	1.50454679	9.775637574	7.869706735	1.05985024	1.436567524	0.808419783	1.004460721	0.999894464	6.411765667	0.480883439	0	0.8590827	0.496162815	1.504591836	0.736733105	0.778918249	0
TCONS_00666212	NONMMUT131235.1	0	0.165551939	0	0.101640064	0	0	0.05461902	0	0.1377858	0	0	0.016800669	0	0	0.054177048	0	0	1.062389	1.700484275	0	0.167969631	0.831720434	1.989320291	0.934700085	2.269287746	0.397818579	3.036526337	2.906556546	2.747512741	1.441338764	1.450055917	0.705795942	0	0	0.488741947	2.469193764	1.163042079	1.806083942	2.017198276	0.359050677	2.220943591	8.530698549	2.574401978	3.087813863	1.125780189	2.926462152	0.384183724	0
TCONS_00666211	NONMMUT131235.1	0	0	0.039327399	0.60885312	0	0.388843587	0.262146126	0.16163967	0.254171758	0.271403469	0	0.072534627	0.216135735	0.227643525	0	0.041701233	4.728952581	6.060834123	16.59490179	5.891225959	3.668155446	5.111752366	10.21607269	19.22882235	11.29870456	0	0	16.35297928	0.300901527	7.975045006	1.206807307	0.953063339	6.791598601	12.0871477	5.942323759	3.313582512	1.629873629	7.022365622	3.682516703	7.959510233	0	0	4.806926555	0	0	6.205659609	0.397956415	0
TCONS_00326194	NONMMUT116711.1	0	0	0	0	0	0	0	0	0	0	0	0	0	0.013790246	0	0	0	0	0.720265835	3.008371098	2.286703119	0	0	1.378779574	0	0	0	0	0	0	0	0	0.266830904	2.807395825	0	0	0	0	0	3.432331554	0	0	0	0	0	0	0	0
TCONS_00326193	NONMMUT056424.2	0	0	0	0.19559873	0	0	0	0	0	0.148835876	0	0	0	0.656342563	0	0.173441731	0	2.5389514	0	5.31249288	7.828712107	1.215209687	0	5.955998938	4.759397302	0	0	3.19568275	0	1.404437275	1.533961445	0	3.457764119	2.730037971	0	0	4.255604389	0	0	1.723034842	0	0	0	6.199927554	0	2.544059154	0	0
TCONS_00326190	NONMMUT056424.2	0	0	0.076239182	0	0	0	0	0	0	0	0	0	0	0.174293383	0	0.121753694	0	0	0.896664818	1.309233293	3.226503491	17.37515341	0	0.155945176	1.916222462	0	2.573591888	0.96565333	2.954524444	0	5.794126725	13.33645706	12.96747136	1.982188659	0	1.302862639	8.590576299	2.48305565	1.016565234	1.083810536	0	6.837258376	4.05959696	0	0.219585278	0	7.189380033	0
TCONS_00622371	NONMMUT111894.1	0	0	0	0	0	0	0	0	0	0	0	0	0	0	0	0	51.06947545	3.871897232	1.625045918	3.292829564	4.193347571	12.71483222	1.571503118	12.39847844	32.67166051	4.224609468	4.189142571	4.938207184	4.565876827	10.28428933	24.14780775	6.979700945	15.83655669	5.37536688	9.540593695	26.790763	3.988628468	5.712719339	0	2.177036736	0.290656206	5.249310367	3.031770159	10.05616149	2.616039489	6.008996459	3.420796517	0
TCONS_00251758	NONMMUT115115.1	1.021992264	0	0.613802009	0.72331558	0.44829955	0.091892865	0.3301682	0.372005227	3.147089926	0.358476976	1.251713539	0.067021593	2.34170008	1.452137245	0.476324603	0.612371303	4.908312797	0	0	0	0.491511925	0	0.443214413	0	0.668415105	0	0	0	0	0	5.082816885	0	0.33364469	0	0	2.426394334	0	1.260609667	0	0	0	0	0	8.1147788	0	0	0	11.11601822
TCONS_00800858	NONMMUT045070.2	0	0	0	0	0.329002839	0	0	0	0	0	0	0	0	0	0	0	0	0	0.109772172	0.005482811	0	0	0	0	0.097793493	0	0.70875399	0	0	0	0.918218743	0	0	0	0	0.792309442	0.681294908	0.375565342	0.800935513	0	1.620996164	0	0.859014118	0	1.00333165	0	0.698477237	0
TCONS_00002947	NONMMUT135292.1	0	0	0	0	0	0	0	0	0	0	0	0	0	0	0	0	0	0	25.69914934	0	0	29.68969254	0	0	50.83228828	0	0	42.62747674	29.66223944	0	22.9825661	72.92385816	0	0	0	90.12029245	36.31768829	0	0	0	0	0	15.60870933	0	20.51894621	0	28.05858263	0
TCONS_00002945	NONMMUT135292.1	0	0	0	5.290460448	0	0	3.172171577	4.535997438	15.22302069	7.038224698	19.43006765	6.020011863	7.712612171	11.45177172	3.188806849	6.686371529	0	0	0	0	0	0	0	0	0	0	0	0	0	0	0	0	0	0	0	0	0	0	0	0	0	0	0	0	0	0	0	0
TCONS_00707435	NONMMUT139470.1	0	0	0	0	0	0	0	0	0	0	0	0	0	0	0	0	0	0	0.096182704	0.025147037	0.018568907	0.54849769	0	0.043830727	0.616304167	3.994057832	0	0.060308349	0	0.122404475	0.264636294	18.82226612	0.06408973	0	0.041069799	0	0	0	0.172651492	0.043431243	0	0	0.668598351	0	0	0.685022188	0	0
TCONS_00707434	NONMMUT139470.1	0	0	0	0	0	0	0	0	0	0	0	0	0	0	0	0	0	12.59697417	14.08814907	0	0.113630029	18.10181508	0	0	39.536815	0	67.72694389	21.80742114	41.03599661	2.364312118	1.869873888	11.82327612	0.061641057	0.029030466	0	58.34834249	3.846211661	1.817483484	5.676537686	0	0	1.535581394	23.70091654	156.9987094	2.001471135	0	6.280630274	0
TCONS_00124448	NONMMUT102675.1	6.224388205	11.09363545	4.747902099	5.411845798	5.383810582	5.451555456	4.198543506	2.730325487	2.755813272	2.080671305	2.981541251	4.206766914	2.500715363	3.527987102	1.29261018	3.467349249	5.411592211	3.774552708	3.197990872	5.559798685	3.105646322	4.059170442	3.004428471	3.819563727	2.599870784	3.307286628	5.043346211	3.236348151	8.202337886	4.378306611	7.806940019	5.098374489	4.394139563	4.919081464	5.444596908	7.434007606	4.902723369	5.619602429	4.378046528	2.68901052	5.320234227	3.682865558	4.509078301	4.769337168	4.828983145	5.141445875	5.974055132	2.671338325
TCONS_00524694	NONMMUT148409.1	59.72543637	26.4052032	17.42400159	19.87890387	17.028083	20.05015313	24.13403481	19.42796903	52.8351882	26.07507233	60.06255457	34.82273756	28.79639088	54.73890013	29.51072546	54.0351109	3.605943462	4.433611035	12.32586393	23.91726341	24.13097114	8.432388701	21.33185892	18.62212002	12.33680301	10.71525868	0	6.411098416	1.272253858	19.0435763	17.66429114	13.67557713	20.27515938	30.34651113	17.01090388	9.537766239	8.552295154	3.791493829	5.4050222	23.11475741	0.298035172	17.9640255	7.681611422	15.85576178	22.61009035	8.339941968	6.523369525	66.30895882
TCONS_00524693	NONMMUT148409.1	4.316395025	0.888517258	1.510083738	0.226793874	0.234806844	0.366807845	0.126437578	0.057452911	0	0.101749714	0.293079233	0.061407956	0.1024512	0.113612819	0	0.081332415	18.90510225	32.86166631	37.27132598	0.901270171	3.547245185	25.91181248	77.71542676	16.0128038	38.18136642	36.57224536	46.14895851	34.65564862	20.70183805	20.36656862	27.80476293	21.66033003	0.146414257	0	13.17963582	14.64364487	24.84723411	19.14481814	30.30823264	3.122679347	24.02216011	10.87733002	16.61836211	2.170495355	12.96077767	27.47357119	22.08859911	0
TCONS_00304382	NONMMUT004044.2	11.41032694	13.2491217	15.39378477	16.79854292	8.119671402	8.958838433	15.32043583	54.86332457	60.28432725	27.29588278	44.84017141	66.12168058	49.31924463	117.0780365	7.624715157	12.60470717	0	2.10210115	3.144401307	8.309953093	16.46537738	4.989797002	10.15889634	7.470577518	4.681367668	1.01743882	0.385297086	5.607207013	4.674457804	6.588186189	11.17138717	6.899605414	23.76171215	16.62982858	12.98358351	10.05319937	10.93102871	11.55442697	3.376358374	18.22337129	1.625873785	3.91889479	4.384397636	2.851510433	10.86822732	8.69547364	8.639513381	9.598772279
TCONS_00173667	NONMMUT056424.2	0	0	0	0	0	0	0	0	0	0	0	0	0	0	0	0	0	3.975106638	4.023034869	0.850734342	1.465264594	0	0	0	2.399428317	0	7.571473043	6.414997016	2.499632922	1.587275997	2.608716741	0	3.347767356	2.227781978	4.685415011	2.688604173	1.22030985	2.025153399	1.900080845	2.590579083	0	14.34364571	4.253270336	3.459502049	3.527913329	4.32121504	3.522091295	0
TCONS_00098669	NONMMUT140759.1	0	0	0.309630846	0.442246249	0.158528777	0.883420558	0.624626384	0.503922423	1.246783969	1.23426364	1.313037486	1.307836546	0.357877116	2.945645226	0.980387855	6.246841485	0	0.031307201	0	0.004967372	0	0.077294565	0	0.123867374	0	0	0	0.239913871	0	0	0	0	0	0.025525029	0	0	0	0.526609272	0.070340799	0.008875356	0	0	0.171453059	0.867851001	0	0.043693213	0.247837625	0
TCONS_00173669	NONMMUT056424.2	0	0	0	0	0	0	0	0	0	0	0	0	0	0	0	0	0	1.138622035	0	0.272927229	0.438486348	4.638771465	0	0.488535688	0	0	0	0.139779819	0	1.795695452	0.187940641	0	1.139592956	0.679552844	1.667720114	0	0	1.674059899	0	0.369570795	0	0	0	0	0	0.087473812	0	0
TCONS_00427828	NONMMUT041688.2	0.084864307	0	0.06541801	0.095872996	0	0.016881342	0.061729561	0	0.157288838	0.084414774	0.121640751	0.051005625	0.118188467	0	0.119677098	0.08833266	2.513720053	1.155204416	0	12.13052833	13.68207879	7.9460513	0	4.378497829	3.097899534	3.247461226	0	2.290877575	1.77909864	0	0	0	33.8006602	18.98760953	15.22346063	9.996346795	8.609768186	4.141441179	2.435409499	2.486053287	4.239528429	0	4.784431914	4.944271134	4.858080899	2.448480252	2.079534698	2.613105773
TCONS_00415115	NONMMUT039131.2	0	0	0	0	0	0	0	0	0	0	0	0	0	0	0	0	0	0	0	0	0	0	0	0	0	55.0094577	0	4.79626814	7.39779692	0	3.253202167	19.99393883	0	0	0	0	0	0	0	0	0	0	7.245812035	42.47510758	0	0	0	0
TCONS_00463459	NONMMUT006722.2	0	0	0	0	0	0	0	0	0	0	0	0	0	0	0	0	0	0	0	0	0	0	0	0	0	0	0	0	0	0	0	0	0	0	0	0	0	0	0	0	0	0	0	0	0	0	0	0
TCONS_00463457	NONMMUT006722.2	124.4694417	27.34586932	94.21532859	149.2689568	226.8706847	153.5174691	34.10743849	66.91439675	81.68864362	52.49843869	84.06959326	62.82225042	45.44337293	117.2543496	75.01299843	84.70939355	41.63298643	45.08710749	65.58464726	42.80924293	56.74847681	76.20831327	119.9789101	75.51067484	97.13446396	69.33133351	25.60549582	51.69772052	30.73122116	56.58573981	93.77942803	34.62992751	42.37531681	36.11438489	55.71132421	41.61069886	59.88690005	79.02893498	20.37146927	42.2576935	42.47582757	42.63629019	48.39005423	38.01757688	53.70796298	61.76592699	40.98136746	19.97184552
TCONS_00362667	NONMMUT120565.1	26.22883077	14.28150359	30.77839805	35.35120168	18.39047017	36.0554248	34.40816821	9.694965295	18.4766721	12.4299492	7.985653732	39.73857321	7.106462441	79.31922948	17.54274474	17.38829206	0	5.652076868	13.34072831	1.910440425	2.084907284	4.276661889	3.984110757	7.190079926	2.233316153	4.102720298	11.11061943	5.266409359	7.800468071	6.267867616	14.74646914	18.61412797	2.569454112	4.173605979	5.016666041	7.203530677	6.597288369	11.07223874	5.683747618	2.073369077	2.297984995	0	7.574761875	14.69271745	17.92589287	5.339638287	13.23406889	0
TCONS_00523262	NONMMUT050552.2	0	0	0	0.141311233	0	0.054271198	0	0.434643761	0.222169267	0	0	0	0.281018846	0.207550162	0	0.136718099	0	0	0	0	0.02378519	0	0	0	0	0	0	0	0	0	0	0	0	0	0	0	0	0	0	0	0	0	0	0	0	0	0	0
TCONS_00585812	NONMMUT019918.2	76.4090898	112.4405594	55.22060717	110.6611555	61.48828065	46.98061236	45.42255293	53.63044265	32.45213065	38.7157793	22.72455127	54.1627226	25.03319696	19.85840646	5.527684173	38.60461191	5.354036321	1.440131253	0.696280183	8.638032294	10.90713554	1.607726946	4.297994605	1.184543569	1.226316724	0.813951056	1.155891259	0.689842347	0.133555937	1.408533227	2.969113727	5.336640324	12.450139	11.60001103	7.672428019	1.804989281	2.531550249	5.207329323	1.758519986	9.92197311	2.626411499	0.252978813	1.369704201	0.495914858	4.717135274	1.53669029	5.451330177	14.05580221
TCONS_00356064	NONMMUT139470.1	0	0	0	0	0	0	0	0	0	0	0	0	0	0	0	0	0	31.2385549	25.39348234	2.88813697	3.463379826	10.53727429	61.84710043	13.33364316	9.490516555	28.78110585	0	9.928595634	21.39699671	18.22163642	24.79127701	18.43721972	10.13170734	17.63367691	27.69653435	10.92916103	13.91781328	24.29366286	42.50075512	12.9246961	17.62909932	31.95603066	33.14252791	18.48063912	54.3371343	34.03192241	15.27894172	147.8623678
TCONS_00830001	NONMMUT011099.2	0	0	0	0	0	0	0	0	0	0	0	0	0	0	0	0	0	0	0	0	0	34.41353441	6.895806738	0	1.750896749	0	4.145989297	7.256494918	26.08133765	8.604759615	0	0	0	0	0	21.55400612	8.402796849	14.72498652	0	0	0	0	21.43955356	27.71110237	5.038833116	0	11.29767812	0
TCONS_00317447	NONMMUT118138.1	26.00155681	35.26885403	8.214791511	25.44075364	18.88057822	10.3244954	7.828275226	2.65513395	3.396835808	3.706114338	5.020002993	7.243140842	1.663063543	7.645594266	5.937262654	18.38314853	1.33850908	3.51956599	3.810285259	1.371948078	2.485379802	1.557640068	3.713727823	4.222362033	3.709690155	2.601591063	4.354435021	3.085772208	3.833456067	0.356916657	1.722531135	1.824561504	0.787944195	0.724383303	1.047364908	1.214810479	0.840064161	3.237005242	2.99067977	1.563866409	0.624085399	2.002074325	0.948546906	1.111593154	0.265124885	1.854973497	0.489196066	1.79721013
TCONS_00837544	NONMMUT059057.2	0	0	0.009436612	0	0	0.01315872	0	0	0	0	0	0	0	0	0	0	1.33850908	0	0.041080531	0	0	0.028676284	0	0	0	0	0	0	0	0.060036029	1.384683155	1.351887647	0.080768988	0.061353661	0.128041972	0.450687328	0.559164714	0.394213506	0.142053244	0.031107449	1.153870119	0.497356346	0.494162008	0.588031043	0.718790234	0.143859903	0.444054213	0
TCONS_00029056	NONMMUT075201.1	6.446560436	13.27296118	7.730185654	2.976385159	0	6.039497978	4.577247963	0	0	0	0	0	0	0	0	0	0	4.32068596	4.965366063	0.463744569	1.654597095	0	0	3.172104422	9.230013154	12.1883066	0	9.018872225	15.1097174	7.934123417	25.20794974	0	2.677515753	3.020002299	5.059762404	5.126465021	3.011826383	6.010594325	14.83413603	3.014212479	5.585251654	0	9.298790969	8.053285357	11.69994712	5.465583973	7.708493641	0
TCONS_00457518	NONMMUT110943.1	8.283458502	10.92642799	13.13475221	9.535528397	14.44364624	18.79037954	20.81776467	8.727024452	10.45674091	8.08254845	14.15598432	11.38823823	8.822407442	6.808063198	3.358976955	5.92686867	0	0	0	0.004561407	0.225640753	0.200965868	0	0.75056695	0	0	0	0	0	0.075850953	0	0	0	0.263758632	0	0.159997868	0	0	0	0	0	0	0	0	0	0	0	0
TCONS_00031556	NONMMUT103862.1	0	0	0	0	0	0	0.017818302	0	0	0	0	0	0	0	0	0	0	0.552019007	0.833855543	1.465283589	0.813620736	0.296965718	1.934097572	1.363702709	0.196339244	0	0	0.562178178	0	0.152574191	2.327192887	0	1.595455443	1.676347763	1.950872145	0.542259441	0.214771249	2.313239648	1.500474763	0.346448784	0	0	2.613973344	1.557792548	1.858145768	1.062859245	0.592438139	0
TCONS_00457701	NONMMUT090143.1	3.606650746	2.297860917	1.931844314	1.525515986	2.312818133	1.987948521	2.250622442	0.977616457	1.222271422	1.652801396	1.753551576	1.350814067	0.857707563	1.811989526	0.478870924	1.150947699	0	0.971608552	1.858107703	0.200624366	0.226092034	0.492721932	2.158895714	1.344033089	1.312689578	6.262132449	0.384141195	1.343427709	0.660968333	0.290698776	1.912407313	0.932120929	0.244934262	0.178003043	0.907319444	0.963400496	0.721115509	1.705253755	1.373966836	0.301062896	1.795089726	4.358318988	3.531590118	1.308595331	1.579229197	0.699440948	0.425430985	0
TCONS_00174817	NONMMUT088800.1	0.384001387	0	0.190666692	0.689182723	0.092361262	0.716270723	0.475934282	0.374123744	1.467007796	0.846567188	0.39166755	0.541705897	0.973776533	2.123750067	0.595947524	0.587625516	3.913800551	13.37139954	17.46592429	11.93551905	13.05481077	32.10565784	11.40557526	53.54372468	24.80619142	6.04277264	3.051552924	16.66711651	5.686678252	6.895079143	1.740434852	4.063929681	8.904133351	21.39958862	10.02362442	3.644831431	3.776491399	6.485348073	3.888896609	6.557513799	2.376277071	6.781350058	11.67842227	12.42700645	3.370471766	9.05867347	2.477101653	0.319959076
TCONS_00837540	NONMMUT046086.2	0	0	0	0	0	0	0.059076217	0	0	0	0	0.060361687	0	0	0	0	0	0	0	0.008662112	0	0.151265463	0	0	0	0	0	0.188812216	0	0	0	0	0	0	0	0	0.988194061	0	0	0	0	0	0	0	0	0	0	0
TCONS_00206241	NONMMUT139470.1	0.066596812	0	0.07744699	0.168641599	0	0.044112393	0.066899909	0	0.135986268	0.158806125	0.21043738	0.205813231	0	0	0	0	73.21243116	11.62799543	25.80090228	64.11115519	58.02184058	20.73820901	19.79851679	33.2504733	20.40421908	2.437579925	7.101795895	14.3197692	22.09015202	13.39927937	5.841257051	15.15624222	43.66277537	67.40962731	34.16298697	19.18713099	9.473813654	8.442754738	13.1468361	46.10553793	4.224895565	18.47251292	14.44166265	24.76697984	4.190455117	10.52630664	6.785971191	0
TCONS_00206247	NONMMUT136346.1	0	0	0	0	0	0	0.080240039	0.048820745	0	0	0	0.139274532	0	0.152632946	0.101311079	0.02924933	0	2.793165873	3.354629903	0	0	2.538338046	2.893331823	0	2.789542289	7.765093074	0	0.765955022	0	0	0	0	0	0	0	0	0	0.533083469	0	0	0	0	0	0	0	0	0	1.15313251
TCONS_00206244	NONMMUT139470.1	0	0	0	0	0	0	0	0	0	0	0	0	0	0.077779075	0	0	0	1.388317835	0.39644753	0.118145004	0	0.512169245	19.30919661	0.089430648	0.088698014	5.381437407	0	0	0	1.039518343	0	0	0.013181153	0.21668197	0	1.760563207	0.649753161	0.760144996	1.919319054	0.262629504	2.056105002	0	0	0	2.445076665	6.619543566	1.3134686	1.79369058
TCONS_00221418	NONMMUT090143.1	0	0	0	0	0	0	0	0	0	0	0	0	0	0	0	0	0	2.248848438	0	0	0	0	0	0	0	11.52737834	0	6.771509028	0	0	0	0	0	0	0	0	0	0	0	0	0	0	2.896939473	14.87000702	0	0	0	0
TCONS_00207629	NONMMUT093367.1	0.3321612	0.165551939	0.108977646	0.21446511	0.187845475	0.135609815	0.052699803	0.35075682	0.323721244	0.109034642	0	0.369413523	0.1319652	0.54612507	0	0.291323958	6.327132422	3.213819864	7.102754148	3.018515668	4.209527341	5.616454955	11.30112097	6.542227468	6.011974656	0	3.58884971	6.016949915	2.65188669	1.744837388	0.765262933	0	2.509011341	1.46214172	1.877178923	2.582712251	1.4475678	2.718604879	2.192768912	1.688884187	0	0.601836596	3.266146492	1.682639113	3.408385382	4.009922746	1.390970966	0
TCONS_00207628	NONMMUT093367.1	1.509619169	0	0.478115118	0.391751292	0.904523587	0.477259277	0.589147094	1.268548891	1.33306424	0.969826052	2.020948608	2.168875887	1.349324958	2.354945625	0.115451289	1.15020501	3.042431139	19.97273162	28.30551814	9.556781776	12.11009939	20.73006216	11.42810717	22.96198152	36.17935239	1.836680558	16.01660723	26.80572674	15.62203798	11.59897597	2.550457078	5.235234972	4.354648202	7.081604452	4.080379492	11.05102607	6.030152693	8.941515673	6.9887453	5.702372809	4.248032999	4.181992756	9.483411623	10.14964144	4.591063037	13.15137301	8.019034184	0.676073527
TCONS_00787055	NONMMUT136346.1	1.117444038	0	1.547447222	2.300337867	0	0.942587073	2.009703063	2.175748379	3.798374659	1.442336088	2.736133555	2.825268989	1.831086691	0	0	0.507004187	0	0	4.396120999	0	0	0	0	0	0	8.410963237	0	0	11.61268874	4.993799166	0	0	2.681341339	0	1.339686076	4.93649422	2.289958251	5.642525421	0	1.938800557	0	35.92830398	2.983317525	14.44451207	9.601501505	0	3.601151498	0
TCONS_00206324	NONMMUT142871.1	0.832021292	0.892821608	0.191992335	0	0.350082755	0.335649632	0.450785202	0.125719744	0.052915973	0.432469517	0.066135864	0.549774243	0.280409491	0.132260992	0.161935195	0.057724366	0	0	0	0.096587794	0	0.071342883	0	0	0	0	0	0	0.134090161	0.195923011	0	0	0.333101367	0.451163394	0	0.298982683	0.898905599	0	0.076988005	0	0.639718801	0	0.181054431	0.127202161	0.333975146	0.875306129	0.102710993	0
TCONS_00035330	NONMMUT011099.2	0	0	0.077466629	0	0	0	0	0	0	0	0	0	0	0	0	0	0	0.104722588	0	0.205938405	0.17881366	0.685046268	0	0.157547577	7.975332898	0	0	0	0	0.930691188	1.928859377	0	2.040310068	0.355989069	0	0.071225718	3.506812877	5.629174327	0.253262048	0.020158263	0	0.43891824	2.043343272	6.263776592	0	0.682924914	1.681365851	0
TCONS_00307419	NONMMUT135292.1	39.42509331	18.35358464	58.29731576	54.2366889	32.13871341	83.45661168	16.7566182	33.27456325	128.2831516	59.85060659	150.0971887	62.42442667	66.29715969	103.6309625	54.7356672	85.72308589	3.923170114	16.66553281	29.63260416	7.612012202	11.82419928	16.04400188	29.59481867	26.25333078	28.45652161	58.90746931	14.67558072	23.44795219	7.770685097	7.563894918	19.33219174	19.35978797	7.062255091	8.473305601	5.699731344	11.2516634	4.611389829	12.81153624	4.188302222	4.071746557	10.00275073	13.40509432	9.862014269	23.0868203	15.71251653	7.260457456	7.532670549	17.84955697
TCONS_00372379	NONMMUT042427.2	7.066667819	13.39133081	6.010296871	7.317964213	1.081321624	4.582929936	4.809347335	6.667762878	17.90748494	5.939848903	25.06543632	12.02306209	6.455008458	13.71412072	3.853667578	6.807208712	0	0.027581644	0	0.108725698	0.229085093	0	0.125293055	0.049299143	0	0	0	0	0	0	2.881288736	0	0.337701002	0.267749045	0	0	0	0	0	0	0	0	0.551255877	0	0	0	0	3.907660195
TCONS_00392059	NONMMUT000238.2	291.5464706	33.67045006	144.7435732	152.1884419	230.0616765	225.8636484	25.0686514	92.25571534	54.80766999	11.23256218	0	0	0	0	165.3307961	0	0	0	0	0	0	0	0	0	9.108745803	28.38003147	0	0	0	0	0	0	38.55833463	0	0	0	0	0	0	0	0	54.85289004	0	66.98867493	0	0	0	0
TCONS_00450061	NONMMUT041697.2	0.059959074	0	0.376963674	0.978451164	0.689898811	0.255974604	0.849762041	1.26589284	0.414427392	0.566310138	1.254567116	0.89892636	1.348848071	0.984087253	1.188373541	0.769758296	0	0.16697174	0.024009661	0.153769593	0.019909478	0.207845085	0.781453565	0.435305004	0.256451468	0	0	0.029989234	0	0.056888214	0	1.102232081	0.208397682	0.535642731	0.34012256	0.106665245	0.034210138	0	0	0.127131337	0	0	0.034290612	0	0	0.601284146	0	0
TCONS_00573561	NONMMUT092182.1	0.268636399	0.175650608	0.248543269	0.554962937	0.560569622	0.118537568	0.454602661	0.652345078	1.53451457	0.3743762	2.840932601	1.416125412	2.713141979	1.860220562	0.843590809	1.500185646	4.27921353	3.922990584	6.737423139	14.2306503	15.13040042	5.870182094	17.92224678	2.311996395	2.888344491	7.606372618	3.327618286	3.380536387	0.484273828	5.027344249	18.40637601	5.687884947	9.103934629	14.9123685	18.26112355	10.13474495	11.68673067	15.36029414	7.753701494	11.63157971	12.34701059	8.448733414	9.613613077	5.918619851	10.0976777	4.031288727	5.845569027	32.21060014
TCONS_00378168	NONMMUT011099.2	0	0	0	0	0	0	0	0	0	0	0	0	0	0	0	0	0	0	1.989824705	6.269658533	6.401866169	2.61479783	0	0	4.214625998	7.212420307	0	6.712070367	0	0	0	0	38.12605086	15.42325195	5.724574462	2.208290574	6.914176882	0	0	12.86724862	0	0	0	0	0	0	0	0
TCONS_00325418	NONMMUT076422.1	1.160287621	0	0	0.438802864	0	0	0	0	0.23466872	0.16183708	0	0	0	0.579521144	0	0	17.60674844	24.64179367	17.2460198	0	0.101956438	25.81301457	39.83107891	3.45148212	19.61481017	0	28.79691158	29.21734097	30.95586225	0	6.632698122	0	0	0	0	0	0	15.86258645	0	0	14.86498882	16.43147985	0	0	2.424524348	0	2.217332417	0
TCONS_00585320	NONMMUT136346.1	0	0	0	0	0	0	0	0	0	0	0	0	0	0	0	0	0	21.48805233	24.34128293	0	0	6.689226219	60.46223447	5.034689921	9.731341579	31.29031347	7.316406372	13.07551589	16.45903304	5.614108256	14.08219285	0	0	0	0	2.315329147	9.127059691	1.231708111	6.743396591	0	12.24833256	0	1.446309428	0	16.55229501	8.989135722	9.478797794	0
TCONS_00366832	NONMMUT135292.1	8.101277272	0	2.175143929	1.652885121	2.307899485	2.840729034	1.934906048	0	0	0	0	0	0	0	0	0	0	0	2.286896247	0	0	0	0	0	0	0	0	0	0	0	7.385138123	0	0.528303011	0	0	1.140864798	0	2.420575008	2.21285121	0	0	16.56151096	2.41481347	0	1.916773956	2.309382909	0	0
TCONS_00589121	NONMMUT154314.1	11.68461365	13.9063629	5.744225661	5.237316733	8.904390799	6.026380166	5.212298944	0.695632384	2.431800212	2.020637112	2.238100288	2.333985221	0.503380605	1.027303654	0.108354095	1.279954468	9.369563562	5.728445568	5.158331713	7.672496459	9.932261299	3.288203536	10.54962312	1.913570439	4.171371183	7.529047268	7.32064464	4.917784515	3.205342494	13.2272494	7.209875249	12.85937427	11.26091763	6.202582016	14.48179504	19.3537421	21.88449928	17.48559623	10.70787439	10.80865062	15.19991882	4.300639819	7.467809457	11.65399916	22.22895305	12.53995204	24.39950793	39.35496634
TCONS_00669488	NONMMUT011099.2	0	0	0	0	0	0	0	0	0	0	0	0	0	0	0	0	0	0.285793004	0.320384923	0.027696864	0.040927251	2.22172405	0	0.014844546	0.051016745	0	0.346767378	0	5.199466193	0.221807148	0.221328654	0	0.115630943	0.17545054	0.035698697	0.179837604	0.958978602	0	0	0.056390693	0	0	6.2995626	4.605437307	0	5.42053627	0.18318741	0
TCONS_00666046	NONMMUT060088.2	0.565798616	0	0.489319253	0.659649072	0.502287557	0.503099458	0.09894978	0.510625789	0.337874321	0.627886395	0	0.482631927	0.238973319	0.769450437	0	0.388221252	0	0.011635843	0.101872994	0.072467074	0.144191078	0	0	0.06406625	0.049153198	0	0.202088322	0	0	0	0	0	0	0	0.026685449	0	0	0	0	0.039855674	0	0	0.037925417	0.354579123	0	0	0	0
TCONS_00812327	NONMMUT001776.2	0.417135222	0	0	0	0	0	0	0	0	0	0.072514449	0	0	0	0	0	0	2.691866206	1.489679447	0.840010474	0	1.609102789	0.20799689	1.410910987	0	0.209795885	1.737689859	1.913792948	0	0.804968234	1.786355467	5.125195469	1.554490413	0	0	1.942747446	0	0	2.883656244	0	5.033330037	3.842748168	2.031204395	3.718369605	12.1470141	3.923148026	4.456545356	37.44417074
TCONS_00432312	NONMMUT011099.2	0	0	0	0	0	0	0	0	0.243180021	0	0	0	0	0	0	0	38.35899322	4.191961185	0	0	0	28.77855968	0	5.030573716	0	13.87359226	0	11.14306964	8.768748616	0	0	0	0	4.225796155	5.700935944	14.12474512	33.00512058	9.377826943	2.707839416	1.439929247	0	0	8.689926864	47.77978484	16.19527963	21.69291546	17.42602988	0
TCONS_00834732	NONMMUT046086.2	0	0	0.028574964	0	0	0	0	0	0.049219636	0	0	0	0	0.050390115	0	0	0	0	0	0.176704347	0.100270769	0	3.181688188	0.455308208	0	0	0	0	0	0.942087794	0	0	0.459911357	0.874053564	0.289500986	0.448020697	0	0	0	0.833631957	0	0	0.955645063	0	0	0.051798304	0.051762658	0
TCONS_00518789	NONMMUT011099.2	0	0	0	0	0	0	0	0	0	0	0	0	0.143357498	0	0	0	0	2.276023089	18.62215756	29.96068984	29.54238722	106.8427154	5.235478398	15.96762682	31.69034042	0	0	10.59645587	0	82.07116685	26.0826189	26.23000053	35.34539314	41.45179605	63.70538062	19.49278025	60.04040094	0	43.14715189	22.6108803	16.00009885	7.227351705	43.04119884	0	0	19.68136733	12.0820488	0
TCONS_00518785	NONMMUT011099.2	0	0	0.030401405	0	0	0.045735075	0.022841825	0	0	0	0	0	0	0	0	0	0	0.028092995	0	0.034511606	0.31389947	1.209582643	0	0.675778315	0	0	0	0.092456808	0	0.06765905	0	0	0.057599631	0.932786655	1.03283884	0	0	0.174214738	0.121162027	0	0	1.060993141	0	0.457357478	0	0.05929169	0	0
TCONS_00545309	NONMMUT018460.2	5.266304743	2.15217521	2.358652151	13.8915793	2.894077302	2.385696403	1.26723887	0.25295723	1.021356089	0.451984617	1.734527723	3.319892771	1.00676121	2.907791698	0.433416381	2.939154705	0	0.240021876	0.264106276	1.455230248	1.168022721	0.417390649	7.684293385	0.769623011	0.290644997	0.610463292	0.963242716	0.38986004	0.133555937	1.403318474	4.548511902	2.020758814	2.225411866	3.794720959	1.771471666	1.38707485	1.026304155	2.168391121	2.49709838	5.960838762	3.126680356	1.77085169	0.788684073	0.743872287	1.735751314	0.438461389	5.204590119	1.59979538
TCONS_00830342	NONMMUT072047.2	5.158948926	0	0.257194314	0.472454129	0.610653941	0.287023729	1.097938786	0.310916056	0.359128255	0.70791426	0.69649681	0.712831279	0.83322737	0.475833123	0	0.244076256	0	0.011145364	0	0.145417656	0	0.173897312	0	0.169300502	0	0	0	0	0	0	0	0	0.080865744	0	0	0.129598273	0	0	0	0	0	0	0	0	0.195679689	0	0	0
TCONS_00830349	NONMMUT072113.2	4.10502969	13.05708145	3.019421188	0.369465606	8.493332434	2.436913142	1.255387969	0	0	0	0	0	0	0	0	0	0	0.926985355	1.147349694	0.082383572	0	0.538727657	0	0.839640185	0.592761922	3.011211932	0	0.488584598	2.294624558	0	0.545869817	0	0.101296159	0.084632487	0.414311793	0.223197026	0.14583782	0.409918853	0.391974105	0.156697318	0	0.466239952	0	0	1.36072562	0	0	0
TCONS_00828409	NONMMUT122446.1	7.527250055	0	3.000724717	7.822721148	2.285101947	3.045173272	3.63569912	5.15963187	8.406733332	5.026361405	13.10155932	6.623829936	6.865767031	5.985471562	5.63381701	3.255303459	0	2.755378081	10.30038487	4.092640358	3.272660298	0	12.39489547	3.247119419	5.234054774	27.72378343	8.823495925	9.548901944	4.978164005	3.666066166	13.30889744	14.49876079	5.960791469	1.414460967	7.24376022	6.194984116	4.798485077	11.35583332	9.648471609	4.261323217	40.94975742	59.26205777	28.0439597	19.29530325	17.60489813	7.717401074	14.36473954	0
TCONS_00091388	NONMMUT112239.1	7.628406992	1.930501163	1.686001428	7.819747316	6.931232574	6.347493843	6.173878956	2.953402145	2.600129422	3.860693077	8.448380967	4.738814941	1.847724744	4.354827248	1.807129602	3.405753415	7.9453899	3.337921609	5.979294068	4.656968514	4.48999216	5.054848107	7.156030775	5.085210225	3.70775822	5.0871941	3.270786966	2.551094157	1.874190467	5.665118022	19.3031103	9.381832059	10.99083423	15.03442068	11.88220997	13.39432818	11.95969337	12.80939882	9.157914873	4.932656131	13.43284415	6.429962487	11.57747071	7.360988215	24.70161308	9.244609936	7.97329044	13.20119151
TCONS_00509282	NONMMUT031787.2	0.578854663	0	0.395090609	0.508007683	0.590706095	1.399719644	0.988249782	1.063906492	1.507035227	0.988437183	0.981574834	0.539029863	1.074134729	0.435803104	0	0	0	0	0.342065647	0.128713784	0.26415232	0	0	0	0.407655253	0	0	0	0	0.161960747	1.560042806	0	0	0.320934696	0	0	0	0.102131222	0.048535152	0.65788083	0	0	0	1.003731673	0	0	0	2.594868106
TCONS_00205477	NONMMUT074073.2	0	0	0	0	0	0	0	0	0	0	0	0	0	0	0	0	5.186722686	0	0	0	0	0	0	0	0	0	0	0	0	0.939319234	0	0	0	0	0.202755561	0	1.44739675	0.679635731	0.650687565	0	0	0	2.597582432	0.940874464	0.512726216	2.139044919	0	0
TCONS_00351662	NONMMUT011559.2	0.081847153	0	0.084212677	0.494956531	0.062888416	0.130114515	0.022338424	0.250048222	0	0.055700457	0	0.451022523	0.063823362	0.374756891	0.27012676	0.226741564	0	0.015590986	0.051716811	0.151922223	0.143680068	0.03342217	0	0	0	0	0	0	0	0.080136531	0.69195447	0.706347058	0.323991411	0.164653453	0.320310421	0.193197426	0.255857626	0.270243488	0	0.209488606	0	0.456879736	0	0	0.174640607	0.179775724	0.144878794	1.196007026
TCONS_00205478	NONMMUT046437.2	0	0	0	0	0	0	0	0	0	0	0	0	0	0	0	0	8.397805969	0	0	0	0	0	0	0	0	0	0	0	0	0	0	0	0	0	0	0	0	0	0	0	0	0	0	0	0	0	0	0
TCONS_00813320	NONMMUT149857.1	2.251729279	7.528971093	1.527464386	1.535159873	5.676743343	1.818494206	1.09517008	0.558750903	0.744033593	1.092074597	0.892386537	0.658425279	1.081897388	1.882107354	0.132462882	0.996215426	16.9816647	4.155436117	10.91464805	13.17975686	17.01024007	10.44696332	10.65199354	0	7.641604055	4.544695721	12.45954453	9.26487391	5.027179034	23.97620167	28.99744081	44.76146109	31.67539086	8.53769674	16.00399939	68.28181012	47.96757465	28.57704072	21.6357748	17.92944364	14.55519733	6.748209833	16.65817351	19.00345736	47.27113965	26.39627134	35.58845615	48.09976785
TCONS_00170276	NONMMUT075201.1	0	0.809052327	0.635621105	0	0	0.702239301	0	0	0	0.164442639	1.469368792	0	2.099070628	0.55308984	0	0	27.94137705	49.04060173	67.63879385	12.187441	15.50091581	38.00259931	146.4609388	38.43255432	59.89565927	159.7688249	31.25009813	57.06753276	57.2802717	28.08262054	36.07957062	28.93579658	1.027020993	9.889178952	19.03225226	38.41212815	31.93133275	36.56582729	27.24471498	18.49764126	31.15236706	20.2195846	29.30314526	0.000371936	20.31526194	23.53936878	27.27010493	11.62443319
TCONS_00577900	NONMMUT011099.2	0	0	0	0	0	0	0	0.227123973	0	0	0	0	0	0	0	0.032046267	0	0.164968079	0.352221734	1.314652245	0.510711298	0.947461315	0	1.765303682	0.042160621	0	0	0.970151716	0.215959951	0.89240542	0	3.658859392	1.614970398	3.71148384	0.726700193	0.062559166	0.413463734	2.055944553	0	0.984910302	1.386495137	2.380530629	0	0	2.010070657	1.110878086	0.430387738	0
TCONS_00314128	NONMMUT118138.1	18.74277858	25.15760379	6.173881175	23.28435169	15.86310534	8.016169544	5.847140176	2.40401066	4.291300562	3.180004243	5.219305824	7.263804659	2.310993863	6.391204269	5.494148581	20.20139496	4.015527241	2.697741524	3.11225237	1.091713476	1.617678286	1.422606463	4.491534605	2.863198467	2.616317871	3.096066329	5.663289223	2.432246823	2.844607907	0.306779178	1.471104881	1.298429391	1.162062691	1.139318172	1.220118825	1.051825984	1.075703595	3.515984249	2.671754586	1.280697248	0.251385101	1.792607868	1.006017972	0.37615142	0.600235817	3.628524693	0.537559808	8.122161143
TCONS_00634896	NONMMUT150254.1	14.43241786	8.014369379	4.153807978	7.519570808	6.772196318	6.530515958	4.84586489	4.124309545	9.011862497	5.189634201	9.3428937	6.713285956	5.216215283	6.273221056	8.043178674	7.034929994	324.3582284	3.935576079	5.28620717	2.768181088	2.938857986	5.165595759	6.602631409	3.347272452	3.830683957	15.02268766	11.27610453	5.753884356	12.38370717	3.839214928	16.9195449	13.90263694	2.017259795	1.774049065	12.0146452	0	1.754056431	33.70624601	4.302289487	2.063015819	10.10630638	15.97561203	0.966309443	37.09988644	19.57229569	2.064023673	5.328508931	12.93434565
TCONS_00634895	NONMMUT150254.1	45.27667102	3.001456658	1.487017556	0	27.88728469	23.26377166	0	0	0	0	0	0	0	0	0	0	246.9254781	0	0	0	0	0	0	0	0	50.53252341	131.3456576	0	28.96761501	71.19235775	73.53400155	295.4286927	0	0	46.52367853	144.8033771	116.8263572	210.3063692	193.9944735	0	609.0493183	176.7970261	183.3333848	270.0522956	93.84501492	102.7317656	131.8355604	123.9860617
TCONS_00160739	NONMMUT075201.1	0	0	0	0	0	0	0.055185346	0	0.836344729	0.330746391	0.233266003	0	0.099086498	0.740685934	0	0.385124078	0	0.090216918	0.136326858	0.462344217	0.162308703	0.130936993	0.218025545	0.165803813	0.156914105	0	0	0.068375453	0	0.105432824	0	0	0.184141681	0.278435523	0.065317703	0	0.181895306	0.049718111	0	0.107966288	0	0	0	0	0	0.038537414	0	0
TCONS_00626013	NONMMUT136346.1	0	0	0	0	0	0	0	0	0	0	0	0	0.03785952	0	0	0	73.77460498	47.54570374	36.98573106	26.26570838	25.89463899	28.24626293	99.87302161	44.32796583	25.70577188	25.45143557	0	53.67257155	25.31325745	24.96122111	42.16504405	18.05051996	25.89959699	30.14330638	28.87389693	13.58923225	29.79012018	28.43968863	34.42186811	37.26673176	5.924934208	0	21.39586732	12.44250379	57.65168213	19.97625283	17.78132282	0
TCONS_00326071	NONMMUT139470.1	0	0	0	0	0	0	0	0	0	0	0	0	0	0	0	0	0	31.77051643	41.80838369	42.05625042	37.08598896	53.02209265	65.72871053	41.77711043	14.29265577	0	9.895777716	35.49540715	18.09990128	60.32467978	43.04929412	10.10324296	33.30832812	88.89818768	52.02891645	41.85176231	53.45180195	48.19974129	40.34597024	68.37429987	4.401115269	0	37.88413085	19.49999211	88.02887155	100.5085457	45.91634565	123.5361992
TCONS_00326072	NONMMUT056424.2	0	0	0	0	0	0	0	0	0	0	0	0	0	0	0	0	5.362067375	0.742210254	1.449319206	2.055132817	4.103794738	1.677987705	0.334852852	2.918543844	0.773030207	0	2.612892191	1.739855392	1.091152007	0.490224707	0.77856975	0	1.970928525	2.773132728	1.472348047	0.053359289	0.806435595	0.144879504	0.329546645	0.33121686	0.248383487	0.668623002	0.070741532	0.894506425	0.70169936	0.294535947	0.218840623	0.470659801
TCONS_00326073	NONMMUT038240.2	0	0	0	0	0	0	0	0	0	0	0	0	0	0	0	0	0	0	0	0	0	0	0	0	0	0	0	0	0	0.171574855	1.545090782	0	0.317047303	0.225973081	0.534771867	0.196690712	0	0.244749404	0.306896908	0.169847466	0	0.363277575	0	0	1.785509555	0.216565409	0	0
TCONS_00381524	NONMMUT135292.1	0	0	0.104077678	0	0	0	0	0	0.41262786	0	0.090922824	0.11166912	0.228534795	0.335580056	0	0.126130822	0	0	0	0	0	0	0	0	0	0	0	0	0	0	0	0	0	0	0	0	0	0	0	0	0	0	0	0	0	0	0	0
TCONS_00089684	NONMMUT098038.1	1.06642671	0.662207757	0.647787559	3.36693247	0.509704565	0.763614844	0.635365608	1.046484063	0.143573484	0.385117481	0	0.949147283	0.734087884	1.399831818	0	0.853302979	2.67701816	1.628746705	1.499907563	5.810771862	6.857852948	2.309932607	5.061865465	0.783556155	0.879970469	1.230897484	2.697079604	4.214926841	0.755926605	4.766549712	2.656379339	12.25020734	7.534774508	4.831241331	5.642250631	11.35824865	10.78423301	6.081314853	3.94006954	3.647620527	2.923696267	0.683801731	1.748409719	0.581212214	8.045420706	0.937110179	5.493073114	17.17316348
TCONS_00814315	NONMMUT072185.2	0	0	0	0	0	0	0	0	0	0	0	0	0	0	0	0	0	0	0	0	0	0	0	0	0.045272232	0	0	0	0	0	0	0	0	0	0	0	0.161711325	0.494176336	0.094362182	0	0.614830425	0	0	0	0.57303104	0	0.095028026	0
TCONS_00814314	NONMMUT072185.2	1.261718845	0.165551939	1.237266479	2.143085928	0.936885162	1.336325976	1.111866216	0.66401273	1.994076174	1.994049782	0.783335101	1.569403855	1.748585259	2.855555919	0.054177048	1.014261204	0	0.814122895	0.816328491	2.948425087	2.490801816	1.700495883	2.214118433	0.375283475	0.399243645	0	0	1.649407863	0	1.630795481	0.555112006	3.674106935	3.476698537	2.569519573	2.992015644	4.670764427	2.301452857	0.744904304	1.840009802	0.778679437	1.511312217	0.505957626	1.714530594	0.388177355	0.887265145	0.043693213	1.852303002	0
TCONS_00124384	NONMMUT102675.1	0	0	0.406618791	0.124720377	0.162861871	0.304109611	0.219063381	0.122842355	0.11040373	0.175901778	0	0.08517034	0	0	0	0.238608796	4.777138907	0.622251495	1.710424275	2.069565109	1.404673415	1.135642663	0	1.741339152	1.288497657	1.987668479	0	0.982537269	0	0.684953065	2.475213078	0.366859577	0.918877481	2.566269386	1.563855187	1.188304165	0.613216733	1.249736734	1.073928156	1.502803638	1.473541918	0	1.887972509	0.405162439	0.089240322	0.9823545	0.18456822	0
TCONS_00124385	NONMMUT010049.2	0	0	0	0.048375951	0	0	0	0	0	0	0.071339447	0	0	0.031707118	0	0	60.22889308	73.06007086	128.1877748	199.6063417	237.4996743	135.2257588	118.7633591	42.57921631	77.38744451	29.38912729	99.44093971	86.2158685	75.26624977	165.636332	77.06388873	182.3310471	263.3810368	114.7128235	202.4411602	334.1627472	253.1483881	180.4111945	81.55400214	139.3567388	59.83728305	121.7432709	151.5918342	66.72360844	84.79528903	157.0050713	160.647357	64.80419128
TCONS_00845212	NONMMUT134776.1	0.207744751	0	0.236072408	0.237449105	0.40059648	0.250165677	0.787298354	0.290236802	0.980647753	0.348161092	0	0.551685696	0.751282306	0.396399915	0.436992066	0.195643411	1.33850908	0.076702643	0	0.367435021	0.260415975	0.484466873	0.761266014	0.135912187	0.029303854	9.610930581	0.521499606	0.204556564	0.249616047	0.666217879	2.017942467	3.950216071	0.811761073	0.191837609	0.601308342	1.687684178	2.432546108	0.413760003	1.125698984	0	2.501469352	2.034961571	0.290750098	1.302272417	0.834315887	0.033032069	0.272621387	9.918411396
TCONS_00437029	NONMMUT100983.1	0	0	0	0	0	0	0.016811499	0.135015922	0	0.034696466	0	0	0	0.02214797	0	0	0	0	0	0.005108776	0	0	0	0	0	0	0	0	0	0	0	0	0	0	0	0.036266183	0	0	0	0	0	0	0	0	0	0	0	0
TCONS_00531442	NONMMUT048727.2	25.89387185	9.741572761	7.649449106	8.201156412	9.247173658	11.03296634	11.27970857	4.270518824	7.353131572	5.50485359	8.088270631	7.094771816	3.888880109	5.988762416	3.432874448	4.609005427	0	1.130899592	0.193878017	2.530677746	3.413898136	1.810393295	0.655639541	2.478526948	1.444437246	0	0	0.254278714	0	0.805063048	2.938483854	6.554239362	3.737150983	1.576647	2.855952448	1.737470181	2.938821948	2.635772339	2.347026285	3.450408041	0.275773207	4.004907587	0.150432914	0	2.164537542	1.421296515	2.232379702	0
TCONS_00494327	NONMMUT097945.1	6.22778936	1.003575856	6.586863051	1.806272283	15.13307661	16.98078963	1.31842847	1.348704714	1.915723571	0.561524419	0.867319814	0.389795652	1.670614252	1.434081077	0.331942771	0.339077321	0	5.820864426	6.357230149	1.29596416	3.219774087	8.87438994	7.594556467	5.842079554	16.28164206	46.24157693	27.15496805	8.900114859	8.888815403	3.443557397	14.04372405	9.7027653	1.805401223	0.655116883	1.99870188	6.315569176	6.587093748	8.102503194	0.823936954	0.738585391	2.327125656	13.00538779	9.84078838	24.6396537	6.961069661	4.590889548	7.309722903	0.895565454
TCONS_00511155	NONMMUT115959.1	0.158428001	0.26289648	1.203487141	0	0	1.548106372	1.970878252	1.143904216	0.879971225	1.203581861	4.300789466	2.212094855	1.800539436	2.292123395	6.20359702	1.725821077	0	0.020078352	0	0.389991179	0.297235237	0.373023569	0	0.055119016	0.22251439	0	0	0	2.018163768	0	0	0	2.344146446	0.135546412	0.039085751	0.706337254	1.137316054	0	0	0.836079235	0	0	0.064157735	0	0	0	0	0
TCONS_00318785	NONMMUT023400.2	5.865017763	0	4.044908889	2.443888505	9.815941025	3.654824273	7.541294646	1.246889428	0	1.199859635	1.34325184	0.700074843	5.982413551	4.05466305	0	1.591062414	0	11.87246292	6.940112701	6.342312624	6.095154021	4.43392541	0	7.373778209	2.913322864	0	4.971295656	6.139485925	11.85041831	3.271356772	1.761919313	1.928906141	0.410394579	0.890372565	1.178368781	3.509766565	4.438115478	1.551390916	9.538528939	1.542492453	2.714708952	6.092994708	5.349198292	0	2.066373188	7.762842015	2.379276602	0
TCONS_00355618	NONMMUT135292.1	0	0	0	0	0	0	0	0	0	0	0	0	0	0	0	0	3.237853465	0	0	0	0	0	0	0	0	0	0	0	0	1.050289178	0	0	0	0	0	0	1.965440877	0	0.490240202	0	0	4.453692001	1.533681907	1.391041177	0	0	0.373703733	0
TCONS_00837538	NONMMUT009005.2	0	0	1.011671558	0.271293007	0	0	0.188513226	0.420383297	0	0.690845194	0	0.619733438	0	0.495752367	0	0.510686031	0	0	0.450733375	0.372890464	0.282084124	0	0	0	0	0.416742941	0	0.47089095	0	0	0	0	1.946062216	1.930389867	1.179757614	0	0	0	0.340308788	0	0	0	0.379665655	0	0	0.195286814	0	0
TCONS_00156672	NONMMUT058095.2	29.76570298	8.508045261	17.97358357	25.28873902	46.16466502	38.29982519	5.702223583	10.08970505	11.55348281	8.556361265	11.75813963	12.64623615	9.845647743	23.7978722	14.92935232	13.17912229	4.168117276	3.376784281	4.269301967	4.434417464	10.76362802	8.756562106	1.499218664	7.63913341	2.951876068	11.64255242	1.242775752	3.812051474	2.627846621	3.827704546	7.202713762	17.10113073	9.347343123	2.492723269	3.5897527	8.895988125	2.594291643	3.097856487	1.352090847	2.108822829	0.322673413	10.05413696	12.20186846	1.51514387	12.1535043	2.770870621	0.518971986	12.95802262
TCONS_00156671	NONMMUT109520.1	0	0	0	0	0	0	0	0	0	0	0	0	0	0	0	0	0	0.71477471	0	0	0	2.287733608	4.297343394	0	5.015523931	10.95374634	7.308507782	0	9.035192711	0	9.519309585	11.74189465	0	0	0.564263327	3.396674738	4.514848818	5.826559873	0	0	1.255049495	0	0	21.82756849	0	1.377210063	1.861791642	0
TCONS_00118057	NONMMUT056424.2	0	0	0	0	0	0.364530636	0	0.158983619	0	0	0.594831104	0	0.306108395	0	0	0	14.27921487	1.852791472	1.89306577	2.147866222	0.730465482	0.502971191	0	2.733612487	0.90807755	0	0	0.805720746	0	0	0	0	3.860842451	1.728920814	7.295969033	0.163277824	0.073209696	0	0	0.795158836	0	0	0	0	0	0.050618587	0	0
TCONS_00118056	NONMMUT059992.2	0	0	1.582512925	0	0	1.088451144	0.727162897	2.030677407	0	0	0.731802842	1.081621065	1.699121491	2.446532358	2.136092635	1.645499983	47.02985504	38.85214272	44.54063515	10.9534618	10.3740128	27.0182378	60.768955	19.17899304	34.40655469	46.79404621	88.8367933	36.74550836	50.12608081	21.37352794	43.9799003	31.83172767	18.20217554	17.80682169	32.6569101	26.60969875	40.68899137	47.92286872	58.58136528	17.16740252	77.761541	106.6452424	62.54360716	36.30592675	44.16606319	44.32820613	25.83802832	0
TCONS_00279381	NONMMUT147126.1	0	0	0	0	0	0	0.010487523	0	0	0.053174661	0	0	0	0	0	0	0	0	0	0.072982513	0	0	0	0	0	0	0	0	0	0.379254763	0.193553698	0	0.275382652	0.484975549	0.401571369	0	0.752623047	0.061954032	0	0.715113768	0	0	0	0	0.054085044	0	0	0
TCONS_00530423	NONMMUT021887.2	0	0	0	0	0	0.013635979	0	0	0	0	0	0	0.032640258	0.082236528	0	0	0	0	0	0	0.056396915	0	0	0	0	0	0	0	0	0.026509908	1.023608732	0	0.703416606	0.070644772	0.141150862	0.280582928	0.5459596	0.636453771	2.103084392	0.079067746	0	0	0	0.161792222	0.355230568	0	0	0
TCONS_00811565	NONMMUT001763.2	5.757113373	7.459108174	3.945632983	1.779303111	8.841424309	3.18966011	3.290869363	1.233134879	1.914750851	1.565674714	0.978105778	2.190666456	1.09887986	1.808594201	1.442951488	1.809381561	2.838977759	8.194806004	7.221962118	4.716312419	4.60165115	7.17870178	6.113832205	4.140645546	8.116842817	5.563355468	6.605918545	10.57516352	10.42724624	7.634208751	14.176018	8.254983462	6.676183499	5.985653304	6.675911434	10.49042021	12.7935997	4.594325153	4.743291129	3.721150114	5.325862252	1.792860847	7.558713869	7.057860259	10.42121443	9.557868425	6.278010276	32.04710105
TCONS_00530424	NONMMUT047348.2	0	0	0	0.015459114	0	0	0	0.237052545	0.869417212	0.190152587	0.802806573	0.133781618	0.204955387	0.738613915	0	0	0	0	0	0	0.080148923	0	0	0.014171419	0	0	0	0	0	0	0.104760939	0	0	0.02064124	0.081927022	0.191170786	0	0.178458589	0	0	0.810060347	0	0.066352334	0	3.372472913	0.088041824	0.863324663	0
TCONS_00502752	NONMMUT022630.2	9.337871454	0.195185736	1.880350461	1.163852176	13.96310223	3.915026031	0.360707867	0.182160826	0.399496139	0.087153269	0.258108916	0.351747669	0.302849668	0.301766095	0.416513142	0.232066806	0	0.900426413	1.107253559	0.024088791	0.167850174	1.214374906	7.410133426	0.917591924	6.655513968	7.434425458	3.482893012	3.346918456	2.482671317	0.242495495	5.353404955	1.178653505	0.214247703	0.048684738	0.606495211	0.708577225	0.214429148	1.41078624	0.040129426	0.202162662	0.684742998	2.534341747	1.026763792	4.62924122	0.537118571	0.757727694	0.489585525	0
TCONS_00812063	NONMMUT001763.2	2.445814552	0.63770607	2.540049165	1.081632323	0.641180783	1.187243814	1.782302101	1.117691523	1.41949042	1.4679131	0.625940698	0.862729468	0.5999502	1.103324124	0.99534072	1.597857234	0	0.296228737	1.270903412	0.683029651	0.723291434	0.629796113	0	0.520512223	0.371410112	0	0	0.133272155	1.619632851	2.399999991	2.084282996	1.666207495	2.085591907	1.541635169	0.871975041	1.490620137	0.299646603	1.293662143	1.323637994	0.721907349	1.272934107	0	0.191855974	0	1.267212579	2.096771736	2.237301049	0
TCONS_00271011	NONMMUT123396.1	0	0	0	0	0	0	0	0	0	0	0	0	0	0	0	0	0	0	0	0	0	0	0	0	0	0	0	0	0.086410691	0	0	0	0	0.021960033	0	0	0	0	0	0	0	0	0	0	0	0	0	0
TCONS_00812068	NONMMUT001763.2	0	0	0.067460482	0.128103563	0.736664995	0	0.046323389	0	0	0	0	0.173801417	0	0	0	0	0	2.845897635	4.667382155	4.158566374	4.25293664	3.406309631	1.46157865	6.54350224	2.953688325	0.347964076	0	1.177497278	2.59272141	4.830719618	4.245697142	3.323964544	12.39192162	5.740825735	4.036149388	8.439647539	11.19170997	2.598506988	5.502338696	5.920689097	2.785496996	7.234941069	2.148924066	0.658574931	14.91368043	6.565582448	8.408316282	39.11435712
TCONS_00430215	NONMMUT056424.2	0	0	0	0	0	0	0	0	0	0	0	0	0	0	0	0	0	0	0	0.09540639	0.530713687	0	0	0	0	0	0	0	0	0.502379822	0	7.331864095	1.018446917	0.415632553	1.001689282	0	0	0	3.23173769	0	0	0	0	0	0	0	0	0
TCONS_00211687	NONMMUT118584.1	0	0.372988519	0.020532732	0.103313597	0	0	0.022642562	0	0.338895678	0	0	0.450237821	0.186171343	0	0	0.316543801	0	0.707010524	1.843077654	1.504958708	0.670936142	0.554016522	1.627767775	0.148117835	0.485582305	0.658282917	6.68721623	0.402095648	2.575225582	4.588167234	1.568897887	1.569762188	5.218568237	2.44917757	2.386611659	1.167904437	2.685769553	0.66355866	2.681426445	1.432563575	3.304150733	1.950719626	4.511787259	5.951350232	0.847512638	1.240122609	0.611627852	0
TCONS_00833810	NONMMUT009005.2	0	0	0	0	0	0	0	0	0	0	0	0	0	0	0	0	0	0	0	0	0	0	0	0	0	0	0	0	0	0	2.753736849	0	0	0	0	0	0	0	0	0	0	0	0	0	0	0	0.190516323	0
TCONS_00323835	NONMMUT117905.1	0	0	0	0	0	0	0	0	0	0	0	0	0	0	0	0	14.76643217	0	0	0.222564734	3.163708997	0	1.733524491	0	0	0	0	0	0	0	0	0	0	0	0	0	0	0	0	0	0	0	0	0	0	0	0	0
TCONS_00323834	NONMMUT122427.1	12.7595981	23.87292074	9.869223005	9.158670349	11.03350137	11.7054383	9.17860674	3.650805229	6.544509366	4.664055853	6.869177404	8.66091614	4.133893995	6.936006032	3.601527598	6.45055967	16.11431082	8.681017273	14.10058608	28.4730736	24.26837308	24.6186435	16.31544801	7.395967589	13.2779457	13.59644193	11.37185085	15.13388693	19.41101992	11.84331085	24.92855498	17.29677692	18.90890418	17.47050391	16.91069527	24.68505773	22.80591515	21.2696246	13.66261001	11.6998095	18.40989394	11.48119044	15.23878221	14.20188572	20.10346491	18.13797014	22.41875423	21.52428696
TCONS_00665851	NONMMUT059992.2	0	0	0	0.141263074	0	0	0	0	0	0	0	0	0	0.081505227	0	0	0	1.382056395	0.867613128	0.165889251	0.118096388	0.831983236	4.08739287	0.587020794	0.189363764	0	1.420975654	0	0	0.107367023	0	0.660420722	0.027381967	0	0.369713223	0.111971841	0.139132633	0.12654111	0.143495231	0.094514203	0.729892262	0	0	0.574393384	0.890618418	0.621011632	0	0
TCONS_00665852	NONMMUT059992.2	0	0	0	0	0	0	0	0	0	0	0	0	0	0	0	0	0	0	0	11.80883054	17.57112989	10.51070042	0	25.74623345	3.42172935	0	0	0	0	0	0	0	0	2.179897024	0	0	0	0	0	0	0	0	0	0	0	0	0	0
TCONS_00318742	NONMMUT059992.2	0	0	0	0	0	0	0	0	0	0	0	0	0	0	0	0	52.71851863	64.63133745	86.95221357	103.4472881	118.9075999	124.1489994	116.4996184	124.4738443	70.13156056	26.55494971	29.87998169	96.17907171	63.03025547	27.43891143	40.19181249	16.57077339	52.30999903	100.609156	50.87687883	40.27815661	36.02430214	24.31286861	21.62497749	32.0178841	8.043572817	30.7890394	17.54300846	15.24653037	8.75187955	51.27389768	21.07430593	0
TCONS_00116858	NONMMUT139470.1	0	0	0	0	0	0	0	0	0	0	0	0	0	0	0	0	0	0	0	0	0	0	0	0	14.53566918	0	51.79548731	4.324447523	0	0	0	0	0	0	0	0	0	0	0	0	0	0	0	50.40676982	0	0	0	0
TCONS_00116857	NONMMUT011099.2	0	0	0	0	0	0	0	0	0.293323742	0	0.092153779	0	0	0	0	0	53.87365197	0.144211404	1.343508628	3.043457441	10.38200314	5.259384984	0	2.407991526	1.40684146	0.246830658	0.965939795	0.67286844	0	4.42580827	3.731763685	0	12.72086992	7.18651232	7.516184218	1.97669366	0	1.206895521	4.291421834	3.3288387	2.612153837	0	5.690904239	0	0.525219861	2.732092895	2.681426072	0
TCONS_00116855	NONMMUT059992.2	0	0	0	0	0	0	0	0	0	0	0	0	0	0	0	0	0	0.808769363	0	0	0	12.53615811	0	0	2.062245928	0	5.697388015	0	10.4049424	11.71315061	0	0	0	0	2.630748798	10.60905863	0	0	0	0	0	0	2.94720951	9.312413182	0	0.618542965	0	0
TCONS_00116853	NONMMUT059992.2	0	0	0	0	0	0	0	0	0	0	0	0	0	0	0	0	0	0.458306118	0.746220279	0.186484004	0.558487409	0.619794197	0	0.115730275	0	0	0	0.481297214	0	0.39080307	1.469846782	0	0.267002088	0.254858905	0.839819287	0	0	0.105600648	1.372841383	0.506967988	0	0	0.5223146	0	0.57892631	0	0.179823899	0
TCONS_00366827	NONMMUT135292.1	0	0	0	0	0	0	0	0	0	0	0	0	0	0	0.059161336	0	0	37.54906395	36.78673898	0	0	14.16367246	93.34046054	30.25002235	12.01668319	0	0	0	0	20.07647665	0	0	0	0	0	0	0	0	8.486582283	0	0	0	0	0	0	20.48149929	12.7618674	0
TCONS_00555729	NONMMUT023400.2	2.04332624	1.38384866	0.612260335	0	2.114120404	0	0	0	0	0	0	0	0	0	0	0	0	0	0	0	0	0	0	0	0	0	6.587038987	0	0	0	0	0	0	0	0	0	0	0	0	0	0	0	0	0	0	0	0	0
TCONS_00366828	NONMMUT135292.1	16.17348015	27.49983263	18.04567889	52.72244218	88.78286836	28.13082086	59.91067796	63.98290702	76.45716046	40.12490781	82.21348074	57.37702266	64.46350311	118.9605269	13.75105571	66.43965531	0	16.52297025	26.01086677	54.49255267	65.55190388	36.83481757	47.89033977	68.0220718	23.61711145	7.510529881	8.453803371	35.85062962	8.412688487	61.14631626	45.26417747	15.22237615	37.96561441	57.31442734	75.07868222	58.15058512	39.38192461	19.18673004	9.298104087	55.155255	5.483321874	0	18.82074524	19.65657723	63.21995374	17.98775287	13.51076189	132.3136366
TCONS_00406169	NONMMUT037081.2	0.877717457	0.331103878	0.274948107	1.011343921	0.585553226	0.381807422	0.492913582	0.758871691	0.437724038	0.265873304	0.39166755	0.543255181	0.423899457	1.114363286	1.191895049	0.663680095	0	0.031307201	0.072028984	0.944215818	0.285369188	0.293750264	0	0.577817414	0.170967645	0	0.577945629	0.089967702	0	0.796435002	0	0.183705347	0.141412713	0.365858747	0.240920147	0.39999467	0.171050692	0	0.0351704	0.031782834	0.125067214	0	0.171453059	0	0.594935483	0.196619457	0.495675249	0
TCONS_00356131	NONMMUT102798.1	0	0	0	0.078993184	0.354142591	0	0.087927393	0.076361464	1.03302873	0.304318584	1.035680908	1.179225912	0.896838782	1.180580841	0.306696267	0.325503483	0	0.078810661	0.565115402	0.16254574	0.147144317	0.084962186	0	0.291744182	0.137081858	0.393748823	2.234337803	0	0	0.221162415	3.551371639	1.046569361	0.360341921	0.486532575	0.72460277	0.196157386	0	0.707019414	0.911265057	0.137897772	0.313793641	0.392876096	0.420917261	0	1.638290065	1.379067025	0.371437789	8.806233647
TCONS_00522262	NONMMUT152809.1	0	0	0	0	0	0	0	0	0	0	0	0	0	0	0	0	0	0.423085516	0	0	0	0	0	0.194081125	0	4.476730808	0	0.723280342	1.500901623	0	2.058491966	5.788371771	0	0	0	1.590165477	0.750296758	0	0.632082424	0	0	0.587416803	0	0	1.06542128	0.769197162	0	0
TCONS_00656832	NONMMUT061342.2	11.00531519	11.06681603	3.437047723	3.860624821	5.645591911	13.28732099	2.610711545	0.867453583	0.767232967	1.147349657	1.096389379	0.425187721	0.881657882	0.787924491	0.975782806	1.041124446	0	0.042442129	0	0	0.007067865	0	0.513935961	0.011288289	0.045049974	0	0	0.027140257	0	0	0.048388424	0	0.008670832	0	0	0	0.104169872	0	0	0	0	0	0	0.176545689	0	0	0	0
TCONS_00355652	NONMMUT075201.1	0	0	0	0	0	0	0	0	0	0	0	0	0	0	0	0	0	101.2229959	131.7664628	0	0	115.1996492	93.13337534	10.12106174	200.6812233	410.4266805	154.9131245	151.3627408	145.3684257	53.77828746	195.3847643	285.2312089	0	0	59.72433109	73.55208656	79.47247802	107.0469025	25.49959491	0	81.66538902	144.8415014	123.4118779	162.7293775	77.77921488	68.24720339	99.11777205	0
TCONS_00185147	NONMMUT086484.1	6.40810544	11.60237656	4.698303425	5.003587929	5.146973821	6.075837863	4.667629436	1.59929047	2.420905747	2.248650058	5.661330631	3.413292421	2.290858639	3.261131919	1.981633872	2.465871788	8.704324549	2.736092845	3.597247532	3.343935568	2.477462466	3.911646036	2.414821757	2.651353924	2.354737375	4.331644032	4.459621125	2.57367605	5.07005049	2.906039621	6.442870332	4.778727185	3.480419924	4.537354657	5.174823031	4.359728572	5.85410732	5.670187896	2.953750851	1.568991391	3.289392802	6.283740733	3.633638979	4.8588498	4.19402473	4.225701677	4.027361401	12.37473722
TCONS_00185146	NONMMUT013646.2	13.19938941	15.29037711	27.5699304	37.5739189	14.41717924	35.67285377	31.66710724	58.84746419	83.79857076	54.10152178	55.72511621	71.46214057	43.68845568	55.77881002	49.61328152	46.44425401	0	1.093623151	0.737960955	2.908211723	4.722820235	1.797546938	2.907788714	4.10828777	1.087969706	0.208167983	0.146220244	1.328643017	0.39973292	1.919958275	1.290374116	0	7.893925586	6.794873294	4.253473532	3.209850561	1.335666437	2.498265365	1.183659803	6.234798846	0.343809772	0.252978813	3.891847287	0.48798022	0.170746484	0.547475955	1.306387525	0
TCONS_00549730	NONMMUT053033.2	0	10.35312162	2.147717856	0	10.73900713	2.146725865	0.65246027	0	0	0	0	0	0	0	0	0	0	0.688904526	1.02132298	0	0	0.310739609	0	0	0	0	1.155891259	0.68228506	0	0	0.145697546	1.102232081	0	0	0.386662664	0	0.369708967	0	0.50764955	0.081276653	0	0	0.754393462	0	0	0.165772049	0	0
TCONS_00580849	NONMMUT043000.2	0	0	0.016693278	0	0	0.018776744	0	0	0	0	0	0	0	0	0	0	0	0.681077725	1.187613896	0.176289259	0.157550337	0.166693458	1.315707318	0.211808802	0.20793085	0	0	0.142358893	0	0.65556082	2.192189183	1.12593007	0.397793962	0.301459099	0.230673954	0.712523839	0.820667012	0.707917747	0.223648572	0.074109624	1.694035417	4.453439022	1.671530167	1.25764008	4.098402372	0.433611443	0.93101974	0
TCONS_00814671	NONMMUT072701.2	5.879335529	7.118733387	1.080153276	3.900897981	1.79569656	1.309054018	0.765589181	0.695632384	1.069992093	0.106349322	1.119050144	1.146872048	0.582861753	0.383236499	0.325062286	0.600472467	0	0.208714674	0.552222214	0.506316181	0.126139817	1.283197987	0	0.047655044	0.18806441	0	0	1.499461693	0.534223749	0.530956668	0.338718971	2.571874855	0.611081547	1.633601848	1.162085413	1.040759465	2.49734011	1.022241528	0.563675996	0.746896603	1.250672142	1.013686103	0.205743671	0.743872287	2.43891097	0.284115115	0.1416215	0
TCONS_00210850	NONMMUT118584.1	0.780729678	0.991656116	1.104397807	0.890837477	0.678226783	0.908088045	1.319592585	0.646843258	1.720595922	0.491440216	0.925846137	0.841522395	0.620297374	1.850870358	0.235507626	0.676606055	0	0.127618588	0.035966473	0.084696206	0.060916367	0.077882003	0	0.214108158	0.191740214	1.955110436	0.418432636	0.039285896	1.23338908	0.153996396	0.28471749	0.273353556	0.072924303	0.242853633	0.38048377	0.191437449	0.365330069	1.002106468	0.272535427	0.095745788	0.207111307	0.366060342	0.309472772	0	0.955790896	0.211387763	0.055480223	0.782939859
TCONS_00248197	NONMMUT143321.1	3.232907681	0	0.021691442	0.035409077	0	0.409338464	0.074975302	0	0	0	0	0	0	0.02693625	0	0	1.33850908	0	0	0.006317549	0.088265353	0	0	0	0.991629438	1.468978168	0	0	0	0	0	5.096537435	0	0	0	0	0	0.507124729	0	0	0	0	0.345066427	1.291114333	0	0	0	0
TCONS_00248190	NONMMUT143322.1	0	0	0	0	0	1.039443434	0	0	0	0	0	0	0	0	0	0	0	0	0	0	0	0	0	0	0	0	0	0.668100152	0	0	0	0	0	0	0	0	0	0	0	0	0	0	0	0	0	0	0	0
TCONS_00838401	NONMMUT115115.1	1.543137004	0.496655818	0.601016922	0.781648453	0.302301612	0.702702924	0.522089871	0.671854404	5.023223789	0.359646819	4.917330143	0.996048314	6.65108845	6.592294607	0.356647505	1.2429306	15.16932341	13.20835163	12.68461629	20.0424576	6.14950026	10.23562452	2.817791312	24.88523785	13.98169981	72.49739963	16.97541903	11.7590485	29.39499401	32.53829513	191.342976	65.23725904	34.82403423	49.96578004	41.56905651	24.61308536	23.58730892	14.501952	25.39401337	3.999607469	66.7775129	97.36243784	37.05875582	88.28028344	78.06440531	50.78331029	32.45309777	15.80693823
TCONS_00036523	NONMMUT009339.2	0	0	0.146125099	0	0.240779487	0	0	0	0	0	0	0	0	0	0	0	0	0.127649895	0.089700095	0	0.042898289	0.18828956	0.772206364	0.039654954	0.097605429	0.950898321	0	0.350574144	0	0.119920356	0.47144842	0.804445713	0	0	0.111135046	0.280529595	0.372377358	0.179759624	0.447578507	0.029375284	0.337931613	0.267398605	0.266540926	0.585551469	0.242950017	0.183161948	0.060295354	0
TCONS_00753239	NONMMUT027809.2	4.116275445	10.39533737	6.920532217	5.585532077	4.187525341	3.078090527	3.922333612	4.071915779	4.556804509	3.664132943	4.852872854	9.478736513	1.860998096	8.742232211	2.004550764	3.059723255	0	1.547024474	2.025310985	10.83404873	14.25317553	2.270589674	1.547278058	1.786259988	2.308182885	0.813951056	1.926485432	1.148287765	0.934891561	17.18075276	14.35399063	16.1105915	37.10727646	20.50843329	16.2583402	30.37911519	39.29879397	31.83368539	10.1756759	13.59231042	8.701926633	7.589364386	7.610252658	5.493248882	15.56216011	6.904030074	15.04792165	91.11794565
TCONS_00522682	NONMMUT050161.2	0	0	0.256958645	0.09558404	0.507479463	0.17432236	0.11152432	0.135047541	0.06998721	0.109858849	0	0.226255722	0	0.300303494	0	0.023307813	0	0.158936225	0.587468397	0.792357455	0.315956783	0.254067234	0	0.899518748	0.854103064	0.3176444	0	0.140949399	0	1.538769312	1.127643844	0.905116244	1.8909187	4.211059705	3.054626539	1.299609349	4.477115035	0.596803191	1.636408358	0.362260744	0	0	0.968195427	0.816275856	2.38401465	1.053596284	0.750629354	0
TCONS_00091288	NONMMUT064966.2	0	0	0	0	0	0	0	0	0	0	0	0	0	0	0	0	1.33850908	0.017740747	0	0	0	0	0	0	0	0	0	0	0	0	0	0.183705347	0	0	0	0.031892908	0	0.056223284	0	0	0.442988073	0	0.186129441	0	0	0.092716997	0	0
TCONS_00830280	NONMMUT059992.2	0	0	0.302708046	0.276277488	0	0.415311023	0.133946644	0	0.66738325	0	0.139377695	0.293719968	0.690823646	1.422101672	0	0.114642835	0	11.90405189	16.85968034	20.173817	28.03579055	8.647669523	11.63089437	20.30506983	9.431908846	0	7.881829846	3.46030775	0	8.224632566	3.366576245	15.34251945	25.3007216	38.02398887	23.197053	7.083078949	16.6851398	9.170683637	12.95666975	11.28849196	0	0	4.968092431	1.824098826	7.48336893	10.03082561	8.430267615	0
TCONS_00830282	NONMMUT038240.2	0	0	0	0.302439992	0	0	0.375075774	0.892749306	0	0	0	0	0	0	1.123469437	0	8.049793609	5.742836445	5.951875035	1.070685389	1.37245988	5.743248959	5.763741008	3.533043729	4.062328019	10.15261501	7.790707085	7.633729491	6.628381166	4.297487421	6.958497384	7.250850037	3.96417793	3.05902156	6.764456674	8.381141652	5.489871976	6.133635033	9.439981479	2.914056823	16.37930265	23.10177221	13.25681914	7.731684572	11.76490326	5.742052776	5.882426022	0
TCONS_00026705	NONMMUT007129.2	0.283557596	0	0.029566741	0.098244838	0	0.054980269	0	0	0	0	0	0	0	0	0.054177048	0	0	0	0	0	0	0	11.16983677	0	0	1.035345743	0	0	0	0	0	0	0	0	0	0	0	1.83724682	0	0	0	0	0	0	0	0.579153534	0	0
TCONS_00026704	NONMMUT007129.2	0	0	0	0	0	0	0.157952584	0.222191307	0	0.079761991	0.228454087	0.304806397	0.026864628	0.157752053	0	0.081047981	4.015527241	3.382638728	6.06428827	11.33161613	11.57278239	5.343404176	2.478119496	3.007938751	5.70742999	0	2.370732972	2.733548656	1.265442505	4.580070145	5.433439409	8.634151298	9.217853734	18.95895343	4.835791698	3.253289982	2.3515365	0.216436411	4.1045615	15.42127745	3.591305057	2.276809316	6.207766632	5.549535218	6.045085358	0.172042025	3.507999956	0
TCONS_00480947	NONMMUT000238.2	54.83292955	26.54973005	20.39970603	25.02894403	7.246650579	18.4105357	19.42599695	16.51462899	139.8766132	59.16648799	174.8705529	89.34759004	71.83373699	212.5354054	46.73880991	138.9310618	36.70727302	34.38014905	54.48296394	70.05065452	104.0237584	59.841452	49.06395278	94.8687615	54.24263118	31.88795703	14.6247215	31.46581377	15.36814814	39.36704261	33.95827048	15.35666476	55.00716371	71.1057621	63.54406333	37.31155614	41.9203853	29.18381851	13.39091867	44.98753701	24.86461286	17.55065812	14.00274282	3.443260838	54.46482909	61.70606729	11.03617402	25.59864583
TCONS_00811742	NONMMUT106537.1	0.518347016	0	0.115046143	0	0.084163517	0.085279415	0.318579487	0.226017285	1.175580858	0.395752413	0.77908271	0.634320845	0.84642124	1.127439642	0.325549879	0.315548281	0	1.177223814	0.424106661	1.146185799	1.361211024	0.494283282	4.351003205	1.644688765	1.078617776	0	0	2.601446081	0.273789671	2.611453484	2.590909801	3.412143111	1.264155227	1.811638924	2.322952054	0.320022402	0.93612623	5.414379698	0.777687879	3.414715918	0	1.550507144	1.294059111	1.275740972	1.815202244	0.437259826	4.674890304	0
TCONS_00124461	NONMMUT010053.2	0	0	0	0	0	0	0	0.184658778	0	0	0	0.099556542	0	0	0	0	0	0	0	0.93144844	2.208531871	6.3604306	0	0	0.77533827	0	0	0.113449272	0.639465828	1.391618464	0	0.86102696	5.778369069	2.418436927	0.082522236	13.37203515	2.818607521	0	0.154468396	0.924983768	0.595069805	0	0	0	0	0	0.175504444	0
TCONS_00124460	NONMMUT010053.2	0	0	0	0	0	0	0	0	0	0	0	0	0	0	0	0	0	0.183741964	0	3.641955097	2.276449737	0	0	1.57660162	0	0	0	0	0	0	0	0	2.734430648	0.518413336	2.341616279	0.218663753	0	3.350628937	0	0.974429912	0	0.470793571	0	0	0.360098222	1.912845157	0	0
TCONS_00814255	NONMMUT135863.1	0	6.100423409	2.959659253	2.545215534	4.097740513	2.342715796	2.163502588	2.505256791	0	1.368981644	0.938659261	0.800717895	1.341005931	0.935386095	3.477191273	0	0	0	0	0.155160822	0	0	0	0	0	0	0	0.083729941	0	0	0	0	0.127859421	0.134678561	0	0.14306476	0.310354376	0.13890094	0	0	0	0	0	0	0	0	0	0
TCONS_00814251	NONMMUT072081.2	4.344043125	0	1.11633841	3.115095794	5.56060862	2.048192278	3.623648956	2.04319879	2.13920601	2.786724451	3.388483836	1.953344424	1.192932552	2.361666629	0	2.07875667	0	0.444270056	0	0.35715361	0.393796206	0.811948484	1.548710723	0.529423716	1.011820717	0.646480626	0	0.336089344	0.156260447	0.628197589	0.076405322	1.085147483	0	0.296439177	0.206454394	0.424234347	0.408195373	0.335481083	0.240249001	0.137238278	0.493890429	0	0.427089571	1.138248578	0.65248197	0	0.400576412	0.319959076
TCONS_00644235	NONMMUT060088.2	2.836343963	1.821071332	0.457778778	2.811102667	1.729880377	1.086773918	0.875099896	0.940210406	0.696029857	0.664816197	1.08973103	1.137938519	0.698798254	1.10201823	1.333838914	0.821430532	0	0.092648444	0.299856662	0.14860608	0.298987271	0.540938282	0	0.260929239	0.353954315	0	0	0.24153329	0	0	0.597161547	0	1.350015073	0.291836163	0.443491475	0.627671636	0.445005482	0.319868667	0.163718211	0.043693451	0	1.671178038	0.076879552	1.090516773	0.373727653	0.116223946	0.045849961	0
TCONS_00168756	NONMMUT118324.1	51.30587681	39.31345346	57.54276978	54.25425498	30.62357491	82.48073918	40.50567702	60.51400966	128.3735659	78.15289946	179.941081	89.28097086	77.12050504	156.8408865	54.62135363	127.0542062	35.63646575	30.72597253	42.84620131	30.95332043	43.81650752	50.94487852	61.83642057	58.00534482	42.15838158	43.37056807	20.25564577	43.34796808	24.98110384	36.79563843	48.37439185	20.10948949	21.87500606	30.34235055	23.16315412	20.79886951	27.77900877	26.45211035	8.520029333	37.95344756	6.56953063	9.689341512	20.44821197	26.22521748	23.13693276	25.57114686	35.22817105	43.42260608
TCONS_00841696	NONMMUT016271.2	0	0	0.027858135	0.015615632	0	0.074125184	0	0	0.059287289	0	0.067031104	0	0	0.019571005	0	0.056871063	0	0.307989809	0.124298018	0.005168074	0.007393053	0.021008663	0.654076634	0.165684676	0.050794487	0	0	0.500100464	0	0.066312695	0.538321222	1.481399916	0.00909507	0.020275381	0.082082911	0.169011081	0	0.303419872	0	0.030392335	0	2.557362819	0.25388769	0	0.086157475	0.277036815	0.189524972	0
TCONS_00830919	NONMMUT057411.2	0	0	0	0	0	0	0	0	0	0	0	0	0	0	0	0	0	8.299810356	6.818839901	0	0	0	27.59690239	0	0	0	19.78500538	0	17.81636203	0	0	0	0	0	0	0	0	2.788922706	0	0	8.438284945	0	0	0	0	0	0	0
TCONS_00165088	NONMMUT141777.1	2.310700921	6.03734812	1.621997437	2.038158996	0.717614997	2.260954464	2.038722039	1.495767724	2.796472971	4.191944626	1.677288308	2.468732626	1.554624764	2.887228213	1.618918538	1.382508845	0	0.063417954	0.138511737	0.100766043	0.188775036	0	0	0.01373061	0	0	0.98250757	0.23799456	0.402671151	0.085692614	0.18673093	0	0.229363978	0.07830228	0.289132519	0.132478235	0.038554826	0	0.076425279	0	0.148204649	0	0.252310322	0	0.347766832	0.032922836	0	0
TCONS_00165089	NONMMUT088033.1	1.655539696	4.663267024	1.744054757	1.608711064	1.156467622	1.076069674	1.695234685	1.401477916	2.449065993	1.93002749	4.238458373	1.573568812	1.454266567	2.002980946	0.89440888	1.646068852	0	0.165510737	0.115294394	0.073744268	0.075596289	0	0	0.011318073	0.064300931	1.091915342	0	0.272152297	0	0.155247937	1.014802038	0	0.076392636	0.037096375	0.268186638	0.127731631	0.096164699	0.344061717	0.7584145	0.037916921	0.688995283	0	0.498036847	0.995177141	0.592934336	0.093132083	0.108128015	0
TCONS_00040658	NONMMUT047750.2	13.08994901	1.717932473	14.36396664	58.87686725	5.596366403	13.46966131	20.992319	18.61891695	26.43391148	19.26882209	26.68604474	42.5800795	19.03009181	22.43202847	28.83237464	36.04667821	0	0.431486282	0.410229076	2.021528932	1.706507741	1.561535714	0.438786177	1.199709787	0.62558771	2.285371077	3.896509434	1.622807412	0.326677823	0.288385322	3.527854864	1.155322926	2.710926367	2.090023397	2.064303018	1.109771879	1.351950463	1.384827501	1.878310368	0.840616235	0.723638902	1.653975479	1.235765071	1.338722159	2.769424673	1.802061017	1.077102317	11.90855685
TCONS_00433272	NONMMUT041507.2	0	0.236573721	0	0	0	0	0	0	0	0	0	0	0	0	0	0	2.528443653	0.146549009	0.195150529	0	0	0	0	0	0.294269511	0	1.047815426	0.130843027	1.184507607	0	2.062701759	7.913107812	0	0	0	0.591885446	1.080287754	1.738646978	1.400379806	0	2.121014886	2.748614802	0.783231866	0	2.21072617	0.374844071	1.082271502	0
TCONS_00811190	NONMMUT106537.1	21.88615908	23.05095536	20.86238477	10.35456046	31.87224765	15.48205914	17.10875776	5.871801333	5.614978053	6.006157705	2.369980347	11.23367207	4.713152603	6.563425633	3.207985523	8.030560749	1.002543301	3.550810577	5.963447691	5.219390001	4.031012323	5.120471193	4.541677875	4.447633385	6.352166076	8.321021645	4.153887887	4.040599425	5.274791742	4.263070051	8.225064395	7.587765643	4.806253423	3.326591929	5.730810042	9.933334302	8.542784735	5.589306908	6.065698159	4.980648211	2.1469038	2.45060576	5.10758664	3.795112429	8.118219176	4.137332154	5.233374688	15.00896029
TCONS_00498335	NONMMUT027782.2	1.461399566	0	0.354761614	0.678876647	0.475937662	0.386975458	0.265764321	2.701267025	2.044900798	1.132221466	2.949144749	4.38449184	1.708473773	2.234559566	0.130404154	4.762947605	0	0.011270592	0.029988067	0.007302813	0	0	0	0.019723232	0.021524827	0	0	0	0	0.027533896	0.384010537	0.276292842	0	0	0.033133606	0	0	0.033672016	0	0.047229292	0.52077988	0	0	0	0	0.02761411	0.101330183	0
TCONS_00705490	NONMMUT109519.1	7.008080179	3.78700061	4.293707466	2.234082801	6.376362337	5.03021733	3.081643279	2.162246787	4.329625733	4.274046303	6.910973927	4.972253704	4.503640296	10.04891022	1.844349234	4.751680845	15.87471769	18.23685167	35.12241326	15.07394043	19.34766591	30.6309703	53.72949104	35.91774401	26.5442656	65.83114048	4.013254451	29.47782746	15.74317321	31.4872664	42.32588717	28.10214172	6.803387956	13.23245574	16.49092735	22.62092524	19.6622771	28.48872525	7.499208481	17.03164214	9.779755885	6.999417795	33.98113911	13.06735651	29.4659646	18.73254737	20.68930788	14.92033163
TCONS_00173357	NONMMUT102317.1	0.068187675	0	0.170536563	0.358786296	0	0.1003199	0.076600868	0	0.121346831	0.341248386	0	0.123298805	0.171175899	0.203232004	0	0.072293725	0	2.577782765	3.914631248	1.350514027	2.316547426	3.118031823	6.095728531	2.306778168	0.982995572	0.296074697	0.917007065	2.122667962	0.892954996	1.247805058	1.438249141	0.322035473	2.682271686	2.592236849	2.01332715	2.170931072	1.962567225	2.039247941	1.801252022	1.148067481	2.050977246	0.745275583	2.888675436	0	1.208422136	1.867426063	1.432784714	0
TCONS_00028076	NONMMUT075201.1	7.736366239	2.138931055	9.430071962	10.10255522	4.480965581	8.72015425	10.16636361	8.584324954	17.21194145	12.34072212	21.41358403	11.61276359	7.528507338	17.901097	1.805016697	8.356159043	0	0.023762166	0	0.306896027	0.116888547	0	0	0	0	0	0	0	1.925609503	0	4.343006263	0	0.459740173	0.744956476	0	0	0	0	2.21285121	0	0	2.688405844	1.404612044	3.441649114	0	0.448336055	0.690546433	0
TCONS_00028074	NONMMUT075201.1	58.87267901	73.31682847	36.92873189	44.50556178	34.55373009	32.41735915	34.73524259	37.83557184	59.13262667	34.78564011	63.87247269	34.63507308	29.8380973	43.65187345	20.70034561	35.65436426	59.85678756	0	4.417201482	1.311267681	1.367336507	1.330950569	2.423287504	3.307182646	3.091436957	30.4733101	0	4.919373945	0	3.857665672	15.62786429	0	1.691965898	2.14063953	6.545998788	1.945360744	2.014121904	12.26280938	13.15802029	1.63357411	20.83519736	26.75124457	16.00641185	20.49380548	12.74395073	7.650550459	7.530546226	0
TCONS_00812531	NONMMUT106536.1	6.36992473	2.450830908	9.954888979	7.835712102	9.385871698	6.112791367	9.440081665	7.109268104	4.512156657	5.10040712	2.801933703	9.280850784	4.505653819	6.132828694	4.378047222	10.16076843	0	2.378428944	1.341035633	2.536420558	2.474980417	2.25358487	3.205783006	2.421638739	3.692713068	0	0	0.642099486	3.443739842	1.796150557	1.509815621	0	3.756948763	1.813961702	2.602617828	1.035746198	1.679273068	2.953286753	1.125417621	2.175519106	1.620495895	0	0	1.018113203	2.438045609	0.839805394	0.452940962	0
TCONS_00705446	NONMMUT128298.1	16.13667088	11.33650014	9.288728996	10.72135322	11.41368156	8.284716522	8.348770993	5.245921905	8.493986323	5.02870109	4.434180243	7.728388442	4.21962766	4.902676099	1.8328637	6.51079654	36.41949356	11.8087319	11.97417041	11.76684734	8.118182647	11.20817565	4.969263217	8.11193102	9.15531739	41.42949829	29.49352871	14.62613922	34.54250694	9.481596627	37.64667814	31.7435491	11.28059632	10.69276642	16.72486081	23.06707929	20.12076138	16.55421029	14.34182077	4.176606073	17.81369853	22.80199232	16.40822924	18.45968672	14.1655761	16.56691514	18.22314649	16.65067031
TCONS_00379941	NONMMUT150550.1	0	0	0	0	0	0	0	0	0	0	0	0	0	0	0	0	0	33.88954434	22.97165179	0	0	3.567638847	0	0	3.080443737	0.000610463	144.9395167	12.90349764	109.3275547	0	22.32704811	42.68963219	0	0	0	8.609111947	8.783213589	0	0	0	34.23902591	48.04067656	36.32202203	33.83639474	0	21.0778461	22.35651158	0
TCONS_00841013	NONMMUT136598.1	0.122002727	0	0	0.022815437	0.043526123	0	0.041782292	0	0	0.076943734	0.055952507	0.082192497	0	0	0.054177048	0.13216715	0	0	0	0.020872999	0	0	0	0.08121611	0.017096765	0	0	0	0	0.15228975	0.172069237	0	0.007770256	0	0	0	0	0	0	0	0	0	0	0.548233875	0	0	0	0
TCONS_00531003	NONMMUT056775.2	41.76432005	55.38672569	45.73624278	48.35078768	37.11841419	42.39657791	50.68513955	22.67733114	69.31579005	34.44705046	41.83764797	59.1926016	27.46145201	103.1557562	21.61582936	40.42453334	5.782359227	0	1.994770696	3.139862779	2.879468013	3.832419107	6.778979431	6.789652458	0	0	7.636780899	0	0	0	0	0	2.576673603	4.224205095	0	2.044052762	0	4.46542979	4.048113008	1.687302991	0	0	8.641097033	12.49593861	2.62344914	3.411129113	1.100469864	0
TCONS_00479657	NONMMUT011099.2	0	0	0	0	0	0	0	0	0	0	0	0	0	0	0	0	1.683844423	0.594586364	0.086794926	0.221246487	0.078834897	0.888964789	0	0.362607233	0.439882654	0	0	0	0	0.701090355	0.527288662	0	0.136336741	0.045349468	0.322081892	0.053385955	0.435289802	0	0	0.012450925	0.165588992	0	0	0	0	0.046183726	0.11705017	0
TCONS_00172173	NONMMUT088800.1	0	0	0	0	0	0	0	0	0	0	0	0	0	0	0	0	7.27613536	7.335068517	7.537064915	1.859963894	2.081881043	4.723161671	23.42003309	10.40670012	6.757479072	1.80371554	2.094474961	3.107664349	3.200000256	1.67477007	0.572386673	0.995499274	0.172687251	1.397435772	1.318102466	4.416954476	0	1.165014595	1.178911799	0.771313765	0	1.481443928	6.266232126	2.031391237	0	3.585705344	0.55667871	0
TCONS_00221478	NONMMUT020560.2	0.713145434	0.596483637	0.557899167	0.469552535	0.858811398	0.259247239	0.288364933	0.316196538	0	0.026879791	0.281161349	0.120723373	0.026493716	0.052235779	0	0.094811442	0	0	0	0	0	0	0	0	0	0	0	0	0	0	0	0	0	0	0	0	0	0	0	0	0	0	0	0	0	0	0	0
TCONS_00102765	NONMMUT012511.2	3.773910779	0	3.45931852	2.208558407	1.592041148	2.589036127	3.444700351	3.165253825	6.786522123	6.57260078	17.43810244	13.04822486	4.42959036	14.83560548	3.486780611	10.41713857	17.98822353	1.911889032	1.261683702	4.112491601	2.427502948	8.259001534	1.464704465	3.661605125	3.144984023	0	4.496224349	2.94752184	0	2.462027107	1.491089301	1.855424002	0.708217196	1.042416654	1.486151354	3.635098228	1.278467086	7.565578575	0	0.898270296	1.17538168	3.63555852	1.371384441	6.22249168	3.508118203	1.583463874	3.320351469	2.087093052
TCONS_00102766	NONMMUT012511.2	8.909325906	11.64111571	4.930693492	4.415828554	2.25976701	3.451048198	2.365974707	5.409711712	8.438881731	6.02971408	17.1940376	10.44490579	7.265477725	12.91926628	1.868241312	8.376780532	6.537278348	2.243160963	2.857101698	0	0.263634674	0.634170986	7.119953669	1.650919662	2.105569129	19.32991317	19.72547698	3.243605546	11.47018456	1.177908406	1.248518129	2.409111917	0.118786679	0.205093607	0.37624641	1.141478123	0.413942676	1.205284716	1.347378013	0.139200868	1.893392556	10.94867004	0.781894532	3.384246969	0.57270653	0.521828039	0.303884333	0.570167073
TCONS_00102767	NONMMUT012511.2	9.685173281	9.080358315	6.342424364	5.148884339	3.056704951	4.535844899	4.886168441	6.96261615	10.41744302	9.127776171	21.45269483	19.6986743	9.229854301	19.9187562	2.593563626	16.06075805	31.31040441	12.43170346	12.14492712	2.576779887	2.662534339	5.895441957	40.02579109	9.098759767	8.42013942	74.93294468	43.92194135	11.21186494	37.4939596	4.385815855	5.65147765	2.627537575	0.73484	0.592597579	1.438505852	3.48782019	1.222875611	9.214051459	3.129849042	0.624747225	2.186049838	16.22580808	1.689944226	7.561585776	5.363776059	0.946919305	3.426355161	2.784603838
TCONS_00102768	NONMMUT012511.2	5.641364384	2.952618836	2.837886701	2.335578387	1.679600874	1.585782582	1.424142702	2.711543413	4.953236579	3.906503047	9.408246228	6.871011043	4.142451465	6.869771065	0.842615622	5.548128563	11.01994526	5.271423045	5.1195321	0.494766698	0.533328466	2.590125404	14.07697427	2.812016949	3.210567212	30.15709011	21.59898406	4.596659799	15.69522663	0.937555699	1.034350962	0.937999501	0.142104891	0.133997893	0.427236451	0.642258108	0.421742587	1.508301887	0.865438026	0.149411103	1.892266952	9.174782606	0.991753077	2.048376321	0.236622067	0.639843406	0.299706499	0
TCONS_00270264	NONMMUT096421.1	0	1.158863575	0.402602585	0.16855732	0	0.136359793	0.314625691	0	0	0.106349322	0	0.060361687	0	0.017411926	0.054177048	0.079009535	0	0.104357337	0.312125599	0.159649246	0.112827013	0	0	0	0	0	0.192648543	0	0	0.436142977	0.483884245	0.368512926	0.458318603	1.194588368	0.283435467	0.026666311	0.957883878	0.216839112	0.211022398	0.666486032	0.8754705	0	0.342906119	1.11580843	0.108170088	0.021846606	0.637296749	0
TCONS_00207646	NONMMUT093367.1	0.225134528	0.993311635	0.1622783	0	0	0.024285679	0.041792779	0	0	0.045198462	0.356976996	0.034023871	0.170063163	0.35071102	0	0	4.015527241	7.914376967	8.558387895	1.738666959	2.454128557	12.0152082	0.536077145	17.41229545	24.01611574	1.93293027	11.69781219	16.6504125	4.217162275	0.931639325	0	0	0.840318998	0.657660877	0.94556906	1.391101463	0	0.054767364	1.911792588	0.682544309	0.38208034	0	1.885983654	0.499758198	0.453340838	3.223969237	0.063517243	0
TCONS_00003033	NONMMUT075201.1	8.325534082	0	0	4.316271377	0	0.951423187	1.088678303	0	7.001152809	5.603067189	17.30292118	8.488100631	10.72884226	13.10736732	2.936721046	14.5422738	0	0	0	3.663544237	2.478603942	5.334546219	0	8.044374038	0	0	0	0	0	3.373376303	0	0	2.521634286	4.222648068	1.087655259	0	0	0	0	2.828664294	0	0	0	0	0	0	0	5.811096737
TCONS_00003034	NONMMUT075201.1	0	0	0	0	12.07777699	0	1.75812836	11.75561813	0	0	0	0	5.500545843	0	0	0	0	0	0	0	0	0	0	0	0	0	0	0	0	0	0	0	0	0	0	0	0	0	0	0	0	0	0	0	0	0	0	0
TCONS_00003037	NONMMUT075201.1	0	0	0	0	0	0	0	0	0	0	0	0	0	0	0	0	0	14.1107504	24.5887265	0	0	0	54.20917329	0	21.41255205	66.17361039	40.89735923	29.18510255	17.60868255	0	0	0	0	0	0	0	0	0	0	0	0	0	0	0	0	0	0	0
TCONS_00400523	NONMMUT146801.1	12.45261642	8.77425278	6.423033258	5.09283903	9.251740973	10.62452785	11.83475023	6.007734224	10.99173696	5.450402738	5.763108241	6.197153293	5.229833053	2.246138497	8.397442388	2.133257447	0	0.261133365	0	0.287368643	0.418099042	1.020288254	0	0.435495624	0.718064109	0	0.385297086	1.349515524	1.335559372	0.037925476	0.048388424	2.204464161	1.116416156	1.337077587	0.014171773	0.026666311	0	1.022241528	0.105511199	0.468796804	0	0	0.102871836	0.619893572	3.840038117	0.873864253	0	0
TCONS_00437089	NONMMUT038757.2	0	0	0.009819575	0	0	0.013635979	0.020975046	0	0	0	0	0	0	0	0	0.015801907	0	0.156536006	0	0	0	0	0	0	0	0	0	0	0.133555937	5.613918629	2.482084234	0.918526734	0.083649341	0.017391053	0.016396742	1.946640727	0.353424941	0.061954032	0	0.724203659	7.879234498	9.360216076	7.98971257	3.843340149	2.272869885	14.32608688	6.050282905	0
TCONS_00294589	NONMMUT136346.1	0	0	0	0	0	0	0	0	0	0	0	0	0	0	0	0	0	12.12028029	10.39697574	0	1.366360943	6.255773759	3.334983329	3.102724634	3.496168663	39.11848775	19.47503388	13.12898669	28.05342462	9.285256436	15.33782408	4.958758425	3.194208035	3.07067799	9.443403673	11.50118008	10.3077542	8.688309544	10.53933783	3.835774905	14.9592895	0	17.02203119	0	7.756011636	12.8154159	4.143915896	0
TCONS_00311828	NONMMUT022630.2	0	0	0	0	0	0	0	0	0	0	0	0	0	0	0	0	0	0	0	0	0	0	0	0	0	0	0	0	0	0	0	89.48122106	0	0	0	12.22527709	0	0	0	0	0	0	0	0	0	0	0	0
TCONS_00125512	NONMMUT059992.2	0	5.119031513	0.522313026	2.819241578	0	0.216893888	1.859060282	2.313040916	5.475489993	3.941252688	2.662891723	6.675720866	1.66118249	4.148495921	0	1.804166932	0	0.079958592	0.310012749	1.014589206	0.491273011	1.315398902	0.659156082	0.744121605	0.103897038	0	0	0.139929765	0	0	0.431624746	0	1.262458275	0.832201025	0.739398102	0.247916696	0.825969584	0	0	0.599448089	0	0	0	0	0	0	0	0
TCONS_00750027	NONMMUT098714.1	0.961923476	0.331103878	1.922957598	1.934568483	0.61529933	2.296121655	1.079721958	4.708925324	21.34687725	7.759751671	12.54785331	16.61853815	10.26652692	14.40842128	2.24959355	8.898006435	0	0.346184595	0.638753034	0.038612311	0	0.266650789	0	0.702661717	0.450174906	0.795840645	0	0	0	0.263544135	0.479384121	0	0	0.161156524	0	0	0	0	0	0.252506672	0	0	0	0	0	0	0	0
TCONS_00686888	NONMMUT057625.2	0	0	0	0.032182408	0	0	0	0	0	0	0	0	0	0	0	0	0	0.021737633	0.050060144	0	0	0	0.211513431	0.111167305	0	0.197586619	0	0.025760752	0.105375634	0.078676401	0.19810221	1.079452618	0.010285914	0	0	0.151971308	0.332283075	0.44659564	0.097984734	0	0.675738159	0	0.23931418	0	0.214555369	0.112706642	0	0
TCONS_00597634	NONMMUT118386.1	0.225628244	0	0.33103752	0.518518436	0.611083347	0.076797836	0.246026803	0.155410598	0	0.227108977	0.447620058	0.104445839	0.044509443	0.176173871	0.055314766	0.080700339	0	0	0	0	0	0	0	0	0.127199928	0.30848745	0.192648543	0	0.133555937	0.274826964	0	0.918526734	0	0	0	0.235116867	0.200402991	0	0	0	0	0	0	0	0	0	0	0
TCONS_00483764	NONMMUT055245.2	7.452534356	8.380073612	8.680828552	6.860716363	5.665032278	7.145512263	8.792760281	3.874545899	13.6960447	5.518173843	6.630819723	9.241494964	3.910498981	18.47367078	3.677808881	6.123555007	0	0	0	0	0.103847838	0.118245225	0	0.439844147	0	2.599759673	0	0	0	0	0	0	0	0	0	0.576925646	0	0.813425464	0	0.14197392	0	0	0	0	0.666273656	0.3669356	0.718481274	0
TCONS_00483765	NONMMUT111674.1	1.586035445	0	0.295873621	0.794145774	0.626854247	0.261115369	0.370115175	0.615444942	0.698072569	0.221259764	0.60344779	1.294858783	0.910324083	1.207377796	0.457741876	0.787314215	0	0.243319567	3.132252418	0.545681124	0.311895249	1.620557844	4.204220177	0.298296751	0.160624102	0	0	0.665131218	0	5.521949349	6.677118695	2.360981117	0.45613787	0.247831014	0.17142177	5.575739035	8.858065372	0	0	0.325948856	4.86799118	5.611829006	6.959862623	0	1.298527819	3.200811834	0.941216488	57.8457213
TCONS_00483767	NONMMUT056775.2	0	0.519667537	0.088415455	0	0	0.10978327	0.251763478	0	0	0	0	0	0	0	0.221638302	0	0	0.642475946	0.525787577	0.311425504	0.305378213	0.449730695	0	0.135644127	0.140706372	4.103941224	0.618016526	0	3.483272399	0.603413291	1.821001579	3.03003599	0	0.647569982	1.336398225	0.972813704	0.476513019	0.634471242	0.810079817	0	1.425391041	0.904905214	2.019271262	2.126110975	2.07605441	1.313876752	0	0
TCONS_00483763	NONMMUT055245.2	0	0	0.068992336	0	0	0.044480565	0	0	0.070522206	0.038578216	0	0.249575454	0	0.025229881	0	0.138314092	1.408111552	0.491022143	1.773953839	0.961398638	0.146792583	0.484868804	0	0.230150037	1.463671106	0.30482467	4.856669773	0.415170954	1.06083481	0.564672417	2.668379669	3.966198437	1.213209437	3.001990137	1.307615353	0	1.780192977	0.279846363	0.587064312	0.041254119	0.821066262	0	3.966532239	2.642854257	0.710028456	0.195483433	0	0
TCONS_00712508	NONMMUT128312.1	2.358865666	2.648831028	1.512234225	1.384577987	1.053995807	1.583832637	2.076529559	0.885350307	2.285892199	0.664683261	1.678575216	1.830971165	1.748585259	1.410366033	1.62531143	2.291276517	0	0.198278941	0.312125599	0.26200722	0.159826654	0.26280152	0	0.345499072	0.495806171	0.203487764	0	0.449838508	0.267111874	0.284441072	1.617189535	0.55111604	0.052099421	0.527517263	0.396809653	0.266663113	0	0.681494352	0.070340799	0.031782834	0	0.505957626	0.308615507	0	0.054085044	0.109233032	0.07081075	0
TCONS_00529368	NONMMUT050161.2	0.054857341	0	0	0.133473318	0	0	0	0	0.233793272	0	0.518176169	0	0	0	0.062303605	0.041969865	0	0.671581208	1.073784091	0.617856267	1.17939767	1.20492951	2.865329737	0.27496365	0.880534662	0.359766367	0.192648543	1.061498922	0.555325587	0.646117377	0.956687541	4.017635934	0.638552827	0	0.275910255	0.498606689	0	0.330245968	1.28111698	0.470163466	0.726890649	0	0.350552925	0	0.476110642	0.370321824	1.024242092	0
TCONS_00812833	NONMMUT149592.1	0.416586648	0	0	0.145236211	0.089121201	0.387261814	0.120889678	0.18544927	2.081912797	0.320882491	0.617659727	2.062921006	0.605593361	3.193643293	0.228139548	2.778417707	0	0.96425136	2.725360685	1.240629731	0.55299903	0.834379367	0	3.561064895	2.72671168	4.483649392	0	1.131553772	0	0	0	0	0.111038751	0.466223161	0.040899738	0	0	0.112508522	0.106566311	0.194367922	0	0	0	0	0	0.141631549	0	0
TCONS_00812836	NONMMUT149592.1	0	0	0.284492734	0	0	0	0	0	0	0	1.644164424	0.435730896	0	0	0	0	0	0	0	0	0.529904035	0	0.17400366	0	0	0	1.464899522	0	0.13542572	0.462709774	0.160068908	0	1.381401252	0	0.976987882	1.839948815	0.394511317	0.283563605	0.37481095	0.388680225	0	0	0.241165873	0.587659107	0.136835161	2.076607319	0.606812721	0
TCONS_00812834	NONMMUT149856.1	0	0	0	0	0	0	0	0	0	0	0	0	0	0	0	0	0	0.07125519	0.335871155	0	0	0	0.102370417	0.124874087	0	2.471765869	0	0.25991669	0	0	0	0	0	0	0	0	0	0	0	0.153511089	0	0	0.187946844	0	0	0	0	0
TCONS_00812835	NONMMUT149592.1	0.207799608	0	0.225722576	0.513979428	0.72897473	0.2035579	0.331007202	1.028176283	1.665199513	0.679439229	0.648601463	0.256174999	0.868728949	0.617252789	0.424748054	1.163399602	0	0	0.148691834	0.182428913	0.699526153	0.033267581	0	2.23942372	0.257819209	0	0	0.052211256	0	0	0	0	0	0.100823864	0	0	0	0	0	0	0	0	0	0	0	0	0	0
TCONS_00429579	NONMMUT045070.2	0	0	0	0	0	0	0	0	0	0	0	0	0	0	0	0	0	0	0	0	0	0	0	0	0	0	0	0	0	0	0.333976906	1.173509755	0	0	0	0	0	0	0	0	0	1.736446572	0	0	0	0	0	0
TCONS_00283518	NONMMUT022630.2	192.7691902	21.70683917	64.40719295	124.5630168	180.8520176	204.0335091	47.32036461	55.89554817	75.04491681	48.51568318	115.2109683	61.15530208	55.88807009	95.43408919	104.2028332	86.11290313	0	6.188776218	15.88085446	15.78998098	30.10516844	22.02539539	31.59625149	39.61593034	13.00863746	12.89217078	0	5.932650179	3.983439384	17.19835018	9.12479876	3.128869466	23.28388604	21.84090786	22.99744358	3.689364171	4.747169869	7.023109071	3.516406905	21.28106269	2.101129199	8.941536141	7.919896884	36.18789902	14.88804412	11.95350174	4.662533828	52.80956545
TCONS_00209228	NONMMUT142450.1	0	0	0	0	0	0	0	0	0	0	0	0	0	0	0	0	5.287110867	2.15315276	4.616841817	3.709933746	5.377331057	1.796109259	10.92146478	5.342857223	2.554991777	0.184359914	0.868459633	1.219482206	0.942370693	3.07577509	0.300492116	0.346468284	4.296110781	3.863349253	1.55413335	3.005346619	0.428139883	1.261136276	1.981992706	3.837379938	0.875345433	0	0.451881683	0	1.118857303	2.59732118	0.908714354	0
TCONS_00356067	NONMMUT150550.1	0	0	0	0.577874693	0	0	0	0	0.544577339	0	0	0	0.189800982	0.421229322	0	0	10.33596712	8.485315959	5.781790593	0	0	22.01714033	6.700182863	0	8.655955092	56.30099454	29.32900686	7.939289795	22.81135408	0	0	9.547901693	0	0	0	0	10.58064848	0	0	0	0	0	0	0	0	0	8.646629861	0
TCONS_00325415	NONMMUT139470.1	0	0	0	0	0	0	0	0	0	0	0	0	0	0	0	0	0	0	0	0	0	0	0	0	0	0	0	0	5.21335601	0	0	0	0	0	0	0	0	0	0	0	0	24.81595665	0	0	5.078261113	0	0	80.99220077
TCONS_00812945	NONMMUT094971.1	2.302088318	0.428945075	2.432986336	7.417184276	1.183832476	2.303648715	6.933270011	9.65882403	21.12563207	9.620359642	20.29984937	17.4254733	12.48235535	17.25706466	9.113933844	16.34190558	0	0	0.024009661	0	0.167153342	0	0	0.752449324	0	0.203487764	0	0	0	0	0	0	0.219412989	0	0	0	0	0	0	0	0	0	0	0	0	0	0	0
TCONS_00549729	NONMMUT053034.2	9.41801803	9.372060832	3.712280597	1.390838687	7.721963651	2.569059417	1.606856328	0	0	0	0	0	0	0	0	0	1.33850908	2.09953396	2.084614849	0.272667228	0.736086591	1.141965358	3.391638713	1.419947575	2.296779343	1.627902112	0	1.191112391	1.187846506	0.38955153	0.338186699	0	0.619506768	0.541836805	0.617889317	1.181237593	0.417124219	2.266185561	0.336440044	0.527746015	0.750403285	8.348300825	0	0	1.111069057	0.206079038	0.849728999	0.319959076
TCONS_00549728	NONMMUT053032.2	57.53662847	21.00076015	16.60953656	19.21005638	14.42588446	10.59878313	14.03985683	9.04322099	12.20763706	7.44445252	10.0714513	11.52908217	7.047328467	7.626441147	7.314118143	9.591757558	0	1.164095661	2.848770345	2.312377929	1.81251244	1.098031127	5.985804062	3.393962482	1.105664857	0	0	1.577373723	0.147846423	0.558585378	0	0	0.53412326	3.227359125	0.441153132	0.312075841	0	2.442320874	0	0.582833613	0	0	0	0	1.593183138	0.502013167	0	0
TCONS_00248188	NONMMUT143321.1	6.936601064	0	5.037638486	4.798562029	1.978389167	3.721026953	4.355090762	2.964026348	0.609068681	3.125792676	1.376599535	6.13335099	1.629469511	2.277271022	0.585328823	3.623045439	0	0	0.757192694	0.808491152	1.05882587	0.232285626	2.34644457	0.139313566	0	0	0	0	0	0.184128187	0.153197752	0	3.717308547	0.419103957	0	0.055332596	0	0	0.297893286	0.725030013	0	0	0	0	0	0.607335656	0	9.694760001
TCONS_00597448	NONMMUT018879.2	2.633152371	1.655519392	1.659508214	7.442190958	2.576434195	1.336325976	0.943877072	1.07506823	1.459080127	1.754763808	0.951192622	2.293744096	0.953773777	2.106843087	0.595947524	0.679482002	2.67701816	1.227701458	0.984708247	3.82143278	4.263017472	3.108029906	7.423808864	0.571985628	1.316741512	0.203487764	3.082569339	3.603086492	1.470584425	5.082032786	3.110311149	12.12455289	8.4218639	4.093261696	5.344133207	11.42859438	10.33146183	5.235115706	1.899201585	2.280426296	1.500806571	3.814161562	1.680239982	2.975489148	6.652460401	5.308725339	5.098373994	24.97728531
TCONS_00248183	NONMMUT143321.1	0	0	0	0	0	0	0	0	0	0.046767114	0	0	0	0	0	0	0	0.657409481	0	0.237539833	0	0.607535279	0	0.345338237	0	0	1.12005863	2.447871214	0	0	6.36554563	4.528704208	2.627366339	0	1.351448648	0	3.1839718	8.375503636	0	0	0	1.352171755	0	0	0	0.740490722	0	0
TCONS_00622949	NONMMUT139470.1	0	0	0	0	0	0	0.077188169	0	0	0	0	0.221607873	0	0.156080508	0	0	406.6711828	131.9382718	250.3647308	469.3062015	451.3989718	288.9725166	216.1727181	312.4854148	199.2401028	54.40469207	58.05097816	158.2639233	157.8125001	184.2412433	147.8728478	138.7577922	324.9140399	509.1884803	301.6889657	200.9252426	104.4721183	90.31692864	126.635526	399.2123009	33.28839001	90.39413644	147.7411356	137.4352402	77.87299834	161.6066875	124.3828706	0
TCONS_00248184	NONMMUT143321.1	24.80797078	6.059697632	3.085241801	7.885689347	1.821031496	1.928741099	2.317973314	2.041301611	4.244026365	2.133234457	1.220380135	2.724424731	1.997811646	1.918916166	1.148336702	2.809594869	0	0.046146815	0.111236762	0.733460567	0.31567805	0.422584844	0.239124791	0.168007859	0.641162862	0.907555427	0	0.057249447	0	0.382478428	1.634560979	3.198126382	1.153116477	0.20949242	0.777633546	1.316942451	1.045222362	0.720494415	0.71624519	0.650713801	1.415385664	0.787017087	0.29027003	0	2.562819806	1.554189421	0.985119153	45.2284551
TCONS_00279837	NONMMUT021887.2	0	0	0	0	0	0	0	0	0	0	0	0	0	0	0	0	0	0	0	0	0	0	0	0	0	0	0	0	0	0	0.307556826	0	0.020914196	0	0	0	0	0	0	0	0	0	0	0	0	0.033949626	0	0
TCONS_00279836	NONMMUT031618.2	0	0	0	0	0	0	0	0	0	0	0	0	0	0	0	0	0	0	0	0	0	0	0	0	0	0	0	0.021982108	0	0	0.151020273	0	0	0	0	0	0	0.207607961	0	0	0	0.763490057	0	0.248081408	0	0.168721341	0	0
TCONS_00480948	NONMMUT000238.2	0	0	0	0	0	0	0	0	0	0	0	0	0	0	0	0	0	0	0	0	0	3.349034359	0	0	1.769822868	0	0	0	0	0	13.28484839	0	0	0	0	26.30194285	0	0	0	0	0	0	21.45659599	0	0	0	0	0
TCONS_00152744	NONMMUT020931.2	12.2357105	9.839910613	14.19139742	19.51888951	10.427688	12.17067064	14.12870712	48.98472501	20.80789306	4.669532843	9.021222736	15.34929284	17.02396114	17.13760144	2.553201725	32.98594363	0	1.643962004	4.196648731	5.912468432	9.646673107	5.254979194	5.217244482	4.327131648	6.088021064	0	0	5.06947006	0	2.719332501	0.335138228	0	11.00723066	6.998520483	7.141893513	7.318195816	8.74907187	5.563317191	4.296908416	5.642589298	2.572757664	0	0.23646806	0	13.89985628	4.040223989	2.002492602	18.81071403
TCONS_00363194	NONMMUT103924.1	5.65030613	6.45652563	3.035662766	3.298907551	4.840573336	2.863555663	2.594330034	1.362933558	1.556352135	0.985725276	1.905350728	3.868620745	1.333375741	1.532841523	3.088091717	1.706605958	0	0.073050136	0.336135261	0.07754392	0.232277246	0.278275892	0	0.555097872	0.024961276	0	0	0	0	0	0	0	0.023467068	0.850834296	0.72276044	0	0	0.247816128	0.386874397	0.023837126	0.250134428	0	0	0	0.243328613	0.043693213	0.460269874	1.713060893
TCONS_00363193	NONMMUT071873.2	0.329144046	1.489967453	0.22585023	0.216716554	0.624590108	0.136359793	0.115362753	0	0.389088034	0.132936652	0.111905014	0.684099116	0.052987432	0.296002748	0	0.268632419	0	1.049083439	1.200483074	1.191179518	0.889329845	1.236852166	0.130242261	0.519058744	1.488033995	1.831389876	2.504431061	2.609063346	0.667779686	1.573964154	3.77429711	10.83861546	1.945757062	3.504509889	3.769691706	4.879934973	5.379373228	4.708506434	3.481869573	2.28041835	5.502957427	1.77085169	1.09729958	6.818829297	4.380888556	1.7258819	1.805992771	24.95680792
TCONS_00502753	NONMMUT022630.2	3.012820029	18.12893066	7.589304208	0	0	0	0	0	0.000437724	0	0	0	0	0	0	0	0	0	0	0	0	0	0	0	0	0	0	0	0	0	0	0	0	0	0	0	0	1.998079487	0	0	0	12.16777494	7.20349742	3.856233936	0	1.931130767	0	0
TCONS_00472547	NONMMUT044546.2	0	0	0	0	0	0	0	0	0	0	51.25663708	6.759442526	36.12325454	27.90271643	12.8902366	3.244431747	0	0	4.37688926	0	0	0	0	0	0	0	0	0	0	0	0	0	0	0	0	0	0	0	0	0	0	0	0	0	0	0	0	0
TCONS_00644334	NONMMUT131235.1	0	0	0	0	0.156147527	0	0	0	0	0	0	0	0	0	0	0	0	3.791364675	4.960924276	0	0	2.623392985	7.127116994	0	6.316758677	0.416132477	5.292826075	5.149181444	4.305042081	0	3.87779995	0	0	0	0	7.432354295	2.750563556	0	3.311750349	0	0.657478345	9.265349021	1.478439731	4.003272691	1.584854042	4.028710828	1.908668358	0
TCONS_00813302	NONMMUT053160.2	0	0	0	0	0	0	0.005327662	0	0.024318002	0	0.028032206	0	0	0	0	0	0.66925454	0	0.168643862	1.50561555	1.419811255	0.210689524	0	0.073168364	0.053683841	0	0.105956699	0.207105649	0	0.48110363	0.810070614	0	2.777963436	0.786213431	0.328416675	0.924174352	0.322772657	0.251595324	0	1.464354355	0	0	0	0	0.776607145	0.056407938	0.225461428	0
TCONS_00662274	NONMMUT076422.1	0	0	0	0	0	0	0	0	0	0	0	0	0	0	0	0	0	0	0	0	0	0	0	0	0	31.98786952	38.16001608	0	0	0	6.849962148	0	0	0	0	3.349955361	4.102206128	0	0	0	10.54091495	19.56816415	4.911855828	7.410455723	0	0	4.070024878	0
TCONS_00753237	NONMMUT027809.2	0.985457275	3.014700814	1.239642817	0.9761636	2.019338856	0.385448228	0.98609984	0.196737486	0.306795915	1.360872508	1.639576318	1.665922192	1.71565357	1.249810661	0	0.448300102	0	0.420059154	0.704755594	2.210699604	3.670916227	0.268675907	1.318051679	0.496196237	0	0	0	0.951228509	0	8.818943742	6.168314412	13.83338002	12.74354805	6.252483447	5.077207857	17.02401315	11.66712826	11.28991423	1.766081622	3.31576801	0.80318165	0	4.015396361	0.829665557	3.313520215	2.059173727	2.157037064	26.67562808
TCONS_00360523	NONMMUT068343.2	8.384834868	1.270776686	1.823396925	5.665356008	3.344484843	2.21857384	2.257334456	3.351461966	8.024600247	2.254525858	9.064306166	3.395606447	3.655682421	5.187691921	1.353288474	2.226946954	0	2.046760454	2.400966149	5.121629925	6.036606882	6.19902409	9.346445117	1.140843894	1.925813747	0.203487764	2.311782518	1.975300867	2.671118745	4.980676951	4.233503259	2.949205637	7.404868324	4.869562908	3.340187771	5.488620196	7.492020331	3.255374613	1.797629471	4.955674849	2.001575697	0.252978813	2.171487288	3.460989794	6.376302166	3.080480726	3.926951758	100.9150926
TCONS_00170434	NONMMUT117023.1	0	0	0	0	0	0	0	0	0	0	0	0	0	0	0	0	0	0	0	0	0	0	0	0	0	0	0	0	0	2.095230863	0	0	0	0	0	0	3.11476469	0	0.993001066	0	0	2.592020917	3.719468381	0	0	2.649556416	1.174183855	0
TCONS_00262324	NONMMUT044546.2	0	4.31113805	0	0	0	0	0	0	0	0	0	0	0	0	0	0	0	0	0	0	0	0	0	0	0	0	0	0	0	0	0	0	0	0	0	0	0	0	0	0	0	0	0	0	0	0	0	0
TCONS_00669049	NONMMUT014129.2	0.137911355	0	0.150710841	0.173337124	0	0.213375805	0	0.285240897	0.360830515	0.228385168	0.495235641	0.60156457	0.18850279	0.899343407	0	0.24750527	8.589212768	3.200159488	4.47055095	2.439764343	3.514328181	6.308009426	0	5.905430979	4.95306945	12.98089144	2.928835802	6.630559629	7.997463078	5.891722742	9.18867148	2.453017495	6.385483618	7.118454085	7.225506976	6.170477776	5.456653931	3.597546732	10.55752093	6.672210101	5.897419421	12.69144108	6.705872061	5.430639631	11.74408052	3.827634663	7.534794871	0
TCONS_00666399	NONMMUT060358.2	0.342419523	0	0.176143541	0.840450878	0	0.253506492	0.199692926	0.163916285	0.116531866	0.088004064	0	0.466736682	0.06851275	0.221967237	0.678350814	0.694193577	0	0	0.032076908	0.093422178	0.36538538	0	0	0.045117413	0	0	0	0.204076736	0	0	0	3.535960515	1.087768918	0.292993298	0.051060899	0.493513424	0.302349204	0	0.193788902	0.437029861	0	0	1.091607339	0.12534248	0.137430097	0	0.23555196	0
TCONS_00751337	NONMMUT151752.1	19.14521203	18.21071332	5.400815476	27.04358928	9.577620861	9.200877066	12.74632574	16.91740014	28.30571674	18.10597202	24.61910317	22.71852925	15.39311396	12.19235318	24.44007886	20.07020753	0	0.187853643	0.888357475	2.130053928	2.273104945	1.128500645	0.781453565	2.399717418	0.547096464	0	0.192648543	0.149946169	0	0.568957995	0.822603216	1.102232081	2.925181513	3.216153638	2.352514373	0.266663113	0.957883878	0.247816128	0.492455937	2.359875436	0.250134428	0.252978813	1.09729958	0.123978714	1.730721405	0.416592936	2.655403122	0
TCONS_00830920	NONMMUT057411.2	0.717369449	0	0	0	12.02222751	0.38673001	0	0	0	0	0	0	0	0	0	0	18.00562415	8.6530182	0	0	0	0	15.02683108	0	23.04503661	223.0435486	52.20505811	24.62281041	28.41442632	0	3.332123687	23.70001049	0	0	0	1.823015708	3.330596454	7.14540633	0	0	23.11379693	73.1971427	11.96934382	99.64838769	0	0	0	0
TCONS_00524862	NONMMUT022630.2	18.81469655	12.22352743	16.81881135	38.6409951	0	22.4497446	20.47915402	20.12511916	44.9940916	38.66938441	39.1280359	25.96546486	16.86454845	36.24940191	19.38931524	32.31137602	0	0	0	0.12701694	0.467992195	0	0	0.236208185	0	0	0	0	0	0	0	0	0	0	0	0	0	0	0	0	0	0	0	0	0	0	0	7.685097045
TCONS_00273077	NONMMUT040978.2	0	0	0	0	0	0	0	0	0	0	0	0	0	0	0	0	0	0	0.03973599	0	0	0	0	0	0	0.348778027	0	0	0	0.108239309	0.841039206	1.287223365	0	0	0	0.403594622	0.119598644	0.545598183	0.495093717	0	0.456620399	1.183181908	0.286326609	0.16873503	0.71424709	0.34408405	0.529062518	0
TCONS_00273070	NONMMUT123396.1	0	0	0	0	0	0	0	0	0	0	0	0	0	0	0	0	0	0	0	0	0	0	0	0	0	0	0	0	0.086410691	0	0	0	0	0.021960033	0	0	0	0	0	0	0	0	0	0	0	0	0	0
TCONS_00069163	NONMMUT006722.2	0	0	0	0	0	0	0	0	0	0	0	0	0	0	0	0	0	0.781928656	0	0	0	6.342405507	0	0	19.71115044	0	21.34025707	7.805957661	0	0	20.6106623	29.97630366	0	0	0	21.42992777	10.23594712	17.59875527	1.079238886	0	24.91714109	10.64281866	15.66631756	16.24939419	0	5.746400251	5.54798685	0
TCONS_00122774	NONMMUT140759.1	2.02972162	3.642142663	1.124027138	1.893476616	4.44993126	2.075586961	1.504340791	1.140299575	1.087744235	0.387563516	1.204825338	1.428640402	0.651559959	1.5138277	0.319861289	1.592073736	4.015527241	2.719698308	2.42497581	1.435889882	1.626916284	2.923790581	10.97538507	2.772230944	3.593962156	2.848828696	5.008862122	6.061184035	6.277129051	2.332454718	6.360997118	3.490401589	1.690142419	1.021001155	2.720980479	1.706643925	3.831535512	2.354253217	2.672950379	1.74712623	2.251209856	3.794682193	3.566223636	2.727531719	6.003439874	1.398204652	3.257294496	0.639918152
TCONS_00792672	NONMMUT031601.2	8.17972327	5.463213995	5.706950553	20.44505179	6.98849968	3.776429937	5.797649555	17.73486305	27.29462285	11.63450945	10.50653799	24.2168874	15.87190839	29.71723068	3.304799908	10.04010507	0	2.683434133	2.646176822	6.717328703	7.608174817	9.377082871	15.15980843	2.389018861	2.916656733	2.907026196	0	8.349392568	2.537562808	17.25076318	17.37608968	5.270506399	28.79520092	23.20912598	14.8838766	23.19406426	21.88248088	17.53261934	6.55766171	10.51118713	2.888177179	1.832072563	5.173390325	3.550626404	37.27476324	6.21736939	18.03645395	0
TCONS_00190837	NONMMUT016271.2	0	0	0	0	0	0	0	0	0	0	0	0	0	0	0	0	0	0	0	0	0	0	0	0	4.726998933	53.94725158	30.454267	0	3.589449369	0	0	0	0	0	0	0	0	16.53751368	0	0	1.886889061	0	27.41613289	65.25582444	0	0	0	0
TCONS_00645421	NONMMUT061342.2	19.55022378	25.68571448	11.73125014	15.23459587	15.08322651	16.24889208	15.69169414	16.87199432	40.73197264	23.28776296	44.00222666	26.77781244	25.44861842	36.42392164	20.64335136	13.5479072	0	0.312372817	1.728695627	0.579326062	2.448441083	0.958452602	0.137275343	3.354450493	0.99785266	0	0.192648543	0.0328682	0.133555937	0.530956668	0.580661094	0.183705347	2.038092121	1.531552782	1.870674079	1.306649255	0.751083591	1.827643945	1.758519986	1.271313366	2.501344285	0.252978813	0.651521626	0.691305312	1.934622021	0.699091403	0.849728999	18.56850501
TCONS_00831091	NONMMUT037038.2	0	0	0	0.149618701	0	0	0.06266295	0	0	0	0	0	0.232217421	0.068289575	0	0	1.962254312	0.769311854	0.536399847	2.226098914	3.054863879	1.908170919	2.543110384	0.77785542	0	0	0	0.525981173	0.288881492	4.47539583	1.079497362	0	1.95887123	2.098752957	1.193518406	0.850175338	0.893089876	1.18084385	0.437343921	1.533919033	0.740648043	0.43259377	1.033793367	0.577864788	1.726124176	0.901653137	0.932152712	33.67185324
TCONS_00063871	NONMMUT000238.2	28.42701929	0.596649189	3.900993194	3.286651026	3.702960528	5.530248693	6.936636505	4.23070968	29.9038472	16.60330928	55.36584516	27.13793026	17.29133572	56.52618213	10.63874685	40.64762466	17.49029815	23.16630616	31.3640609	14.38453393	22.09492171	22.69076246	27.37431837	27.82652507	23.07846079	28.51819966	20.68101376	21.68101652	5.564875237	22.09299318	23.4745796	8.808855083	22.84520147	17.61750255	20.97972318	12.81945584	15.35898378	18.66015175	6.141314518	14.4645903	4.877746423	0	8.499476806	22.71538007	30.411263	19.33013944	5.307867597	0.445063075
TCONS_00492891	NONMMUT044096.2	0.471334274	0.165551939	0.119867555	0.118832911	0.039036882	0.175290515	0.282219245	0	0	0.042938539	0.046720344	0.14563263	0.159518664	0.151292228	0.202730512	0.161195253	0	0.118915186	0	0.14529906	0.323602022	0.083864603	0	0.0739785	0.196612792	0	0.815673932	0.025490849	0.133555937	0.328301886	1.815533687	2.423073524	0.526427431	0.086563881	0.080240581	0.438420825	1.006154383	0.647791359	0.482080669	0.09224173	2.658928975	2.172076087	0.254607793	2.343321683	0	0.512761697	0.630534323	0.285723455
TCONS_00625671	NONMMUT011099.2	0	0	0	0	0	0	0	0	0	0	0.174348012	0	0	0	0	0	0	0	1.609175532	5.551998679	5.365962745	30.8251497	0	3.045758985	2.274057743	0	0	7.890107451	15.08247199	12.72900346	8.883050191	0	6.957460828	8.735217922	10.44420013	14.3760751	38.18846972	0	0	4.290587262	0	0	1.786266554	32.13379505	3.635921162	9.654758124	23.75098768	0
TCONS_00718271	NONMMUT152735.1	0.249930046	0.165551939	0.089515248	0.410376876	0.195184409	0	0	0	0	0.02658733	0	0.023822746	0.026493716	0	0	0	0	0.589180654	0.628981102	0.663985777	0.741866977	0.244204448	1.675827169	0.366133707	0.608832881	0	0	0.335759462	0.271385664	1.165089595	1.244356724	3.229907407	1.724118684	1.189160045	1.069203611	2.055012616	3.629148333	1.446998372	1.351281928	0.591399086	2.865414946	0	2.28756101	1.206808807	1.635315388	0.680347014	1.171209804	2.012542588
TCONS_00426728	NONMMUT037038.2	0.054857341	0	0.078556602	0.808437027	0.312295054	0.231811649	0.011001412	0.316196538	0.632268055	0.053174661	0.223810029	0.382290683	0.171414343	0.246500641	0.054177048	0.252830512	1.429527698	1.66865295	2.962384063	3.815142599	7.233850081	1.903641457	1.68624655	0.872349416	0.471562958	0.446655642	1.155891259	0.388390568	0.461702875	3.297601201	4.096757571	1.653348121	10.00228494	6.562927357	6.385290878	3.162117864	6.258334317	10.10426895	2.923680159	8.4467967	2.448440853	1.474360521	2.780077068	1.075887284	9.148377007	2.458114605	4.864486087	2.407372087
TCONS_00626824	NONMMUT111964.1	0	0	0.196803927	0	0	0	0	0	0	0	0	0	0	0	0	0	0	0.556495936	0.490469365	0	0.209102613	0.216517535	0	0.378881431	0.073139959	1.450867757	0	0.273051974	1.045876545	0.517094907	0.368768183	0	0.158270597	0.339627526	0.648712924	0.313915817	0	0.237500782	0.371821466	0.654225804	1.218154667	0.419438872	0.607115283	0	0.73236558	0.235593803	0.111243688	0
TCONS_00524887	NONMMUT015260.2	141.4880541	151.6851433	108.7457567	144.2447568	75.7640683	94.26706611	107.690459	115.2931311	229.6628111	150.0475401	269.171118	147.3855531	112.8162305	204.1341683	103.7169735	141.0192522	44.17481518	0	0	2.796233741	4.842801387	5.457336365	0	13.41482353	2.381545101	0	0	0	0	0	9.018731333	0	2.743213122	1.693679257	2.336982109	3.744323439	0	0	4.037386036	1.303278951	26.70247558	0	14.23259279	24.35227104	5.856490809	4.147075741	1.871138661	0
TCONS_00626828	NONMMUT150550.1	0.096219776	0	0	0	0	0.023031169	0	0	0	0	0	0	0	0	0	0	15.67929537	0	0	0	0	0	0	0.016184844	0	0	0	0	0	0	0	0	0	0	0	0	0	0	0	0	0	0	0	0	0	0	0	0
TCONS_00520392	NONMMUT076422.1	0	0	0.566402919	0	0.515716245	0	0.740031087	0	0.738391816	0.09441161	0	0	0	0.62458321	0	0.159109402	54.11458361	21.79324536	33.47815961	30.1008938	25.82283877	28.7179762	32.79747586	43.16617158	20.51698934	9.922877323	18.93985622	18.445688	12.6836738	13.2354982	20.06213112	18.64113265	25.77930687	33.07707662	23.14721088	13.32032917	13.4026428	13.03546909	22.35265306	23.06388104	24.96554211	28.59520713	26.70899189	21.46939399	24.86186707	15.00256704	14.34289442	0
TCONS_00073892	NONMMUT007128.2	14.96678322	9.436460537	9.510081861	10.66393538	7.690265703	8.593735086	9.738871196	9.769619297	11.47819427	9.121767434	9.339704407	10.0456736	7.102753321	9.555752233	8.239245409	11.81786701	12.04658172	10.8583705	13.53501449	3.222670562	5.43076146	6.885817215	40.71021417	29.66306113	15.55066989	14.02274879	6.876397099	20.40869328	1.806344051	1.563857015	2.265933142	0.55111604	1.071826495	5.685810789	1.798681471	0.426660981	1.103687488	1.477665618	4.829634461	2.042420542	1.91165237	2.276809316	2.091727325	1.033114628	2.39569702	6.983071095	0.800373906	3.839508911
TCONS_00028824	NONMMUT059992.2	0	0	0	0	0	0	0	0	0	0	0	0	0	0	0	0	0	1.590301462	1.723053357	0.203064718	0.185005508	4.00772318	4.878093635	0.357389006	1.20927125	0	6.038183288	8.107169526	10.04193737	3.821731284	0	0	0.416065973	0.220578791	0.7727868	5.003266663	1.515235454	1.638219492	0.625927604	0.442536237	2.880798213	0	4.061242909	5.406959696	0.178588815	2.269294386	0.969859436	0
TCONS_00204509	NONMMUT038240.2	0	0	0	0	0	0	0	0	0	0	0	0	0	0	0	0	0	0	0	0	0	0	0	0	0	0	9.276605298	0	0	5.038797743	13.19165228	11.65996206	1.159435392	0	0	0	0.868732257	6.47147037	13.10843002	1.037963798	20.15645758	0	5.81702511	13.600341	8.435806553	3.538276362	6.046813178	0
TCONS_00294594	NONMMUT111964.1	0	0	0	0	0	0	0	0	0	0	0	0	0	0	0	0	0	0.204832581	0.184874393	0	0.02047358	0	0.413909905	0.017537056	0.265769204	0	0.686214111	0.280729218	0	0	0	0	0.0153991	0.084402762	0.177671522	0.03853282	0.150832501	0	0.081419475	0.135005534	0.453618786	0	0	0	0	0.227881951	0.276870032	0
TCONS_00294596	NONMMUT136346.1	0	0	0	0	0	0	0	0	0	0	0	0	0	0	0	0	0	0	5.060900506	0	0	5.639411441	7.197968783	3.561160205	4.952214612	0	0	9.155623131	0	0	0	0	3.547911002	0	0.81490531	3.6746977	3.236518573	5.691933762	0	1.841902642	14.71603376	15.84659284	6.122005812	0	0	5.513406194	2.998233367	0
TCONS_00294590	NONMMUT059992.2	0	0	0	0	0	0	0	0	0	0	0	0	0	0	0	0	0	0	0	0	0	0	5.410654239	0	0	0	17.86314352	24.69655394	0	11.25740017	4.148242855	0	0	0	0	9.800669403	7.1558373	0	1.966095685	0	0	0	5.652807369	0	0	1.6051794	1.255439191	0
TCONS_00006724	NONMMUT033855.2	101.1381757	388.5257342	179.1730464	123.8884624	152.8967306	160.6847989	198.9030057	28.18585427	51.24916811	45.78269173	68.06907858	77.55784599	25.73003468	59.61665976	39.38449239	69.36779609	21.89399303	18.43041366	34.84385317	25.51321306	21.39003327	29.49381266	20.29291641	17.94561497	18.21694451	38.32142618	28.84276194	18.24730922	22.08387489	29.57697912	42.79743237	57.45678649	37.01657881	36.63680566	45.70087954	68.32410289	57.65157539	39.70568861	33.11894548	19.07713767	43.14581264	26.87469823	45.10244181	40.11318909	50.58006264	45.79898521	31.79554914	34.61541255
TCONS_00006723	NONMMUT033855.2	0	0	0.082877215	0.395579951	0	0.181631245	0.229341154	0.112439489	3.141885874	0.938346653	3.342658733	3.314158411	0.579338089	4.356307262	0.457145928	0.847298254	8.073886772	0.865456269	1.171287326	0.851541711	0.752737552	1.875119763	1.736650305	0.508437626	1.793023177	0	0	0	0.149983318	0.415075375	0.054340201	0	0.21726947	1.132554039	0.917126311	0.485620196	0.623035042	0	0.855062758	0.687852042	0.140450482	0	1.75461632	0.289738256	0.192326416	0.024533739	0.212255223	0
TCONS_00669747	NONMMUT078900.1	0.131986763	0.165551939	0.064819016	0.47049164	0	0.024885662	0.025704919	0	0.381695361	0.121424338	0.39166755	0	0.665363185	0.372301809	0.14221475	0.026468194	2.67701816	4.791911517	5.922943392	8.346786455	2.716860668	3.756268502	0.260484522	10.32049214	6.386906701	16.20332367	2.691685445	3.6172714	7.932287781	16.46875883	49.67333071	22.05511282	17.81320126	21.52343606	16.48419576	21.39478157	28.59782844	10.61827057	12.80614044	1.045766483	30.45574268	31.60590799	18.09272126	42.49618397	33.82673352	28.03074704	15.28343821	57.36066334
TCONS_00221199	NONMMUT020336.2	45.63099459	18.54181719	9.414360641	20.32853052	17.99455812	7.882959662	3.859408474	3.478161919	1.848168161	2.632145712	3.916675504	7.75693952	2.781840184	5.103522669	4.767580195	11.29836352	10.70807264	9.246101819	6.818287679	2.103501978	3.183844116	4.91899518	27.48111702	6.403467892	5.924610189	14.85460677	20.61339412	9.69896807	14.96627833	5.138902038	10.93578393	4.776339016	1.458813548	1.471943332	3.046945438	2.906627935	3.044702326	4.956322562	5.064713412	1.605033125	5.252822998	11.89000421	3.429061189	2.975489148	6.436120225	2.931770877	5.247820081	3.839508911
TCONS_00601396	NONMMUT150254.1	301.2744874	115.2873906	2631.225443	1899.957958	1182.717817	929.1964863	3773.912938	5059.833349	2644.449273	5211.945943	1791.717732	3531.439799	4705.447462	1560.652653	4684.918047	3717.493784	1669.368447	4322.607002	2473.99636	4074.585698	3513.835634	3044.802164	707.883749	2879.216537	3273.552205	797.1024726	2156.303392	3452.42415	1746.493362	3588.091216	472.8861367	1366.361791	3234.731069	2951.153749	3168.096385	2213.152562	2409.796298	2965.249178	4490.455592	4941.700263	3238.773348	520.8024225	3419.091433	1075.869555	2463.557579	2979.387522	4330.524421	332.788475
TCONS_00354230	NONMMUT011099.2	0	0	0	0.086831099	0	0	0	0.069120563	0	0	0	0.065935082	0.033117145	0.096758075	0.054231225	0.267384069	0	0	0	0	0	0	0	0	0	0	0	0	0	0	0	11.35960382	0	0	0	0	0	0	0	0	4.681015695	13.43443986	0	2.910524301	0	0	0	0
TCONS_00356100	NONMMUT136346.1	0	0	0	0	0	0	0	0	0	0	0	0	0	0	0	0	0	20.30091457	25.54911296	3.808026804	0	27.3751068	76.00313175	4.879072373	22.19165161	55.78515306	16.37474087	24.13890413	13.20921642	0	8.669415297	0	0	0	0	5.456647288	0	14.02385274	5.80005613	0	4.968420153	17.00220006	5.482657353	7.895584432	14.53135326	0	0	0
TCONS_00283347	NONMMUT016271.2	0	0	0	0	0	0	0	0	0	0	0	0	0	0	0	0	0	0	0	0	0	0	0	0	0	21.04205921	38.8117461	0	5.264240823	0	0	39.63626562	0	0	0	0	0	0	0	0	0	23.74484436	0	33.11831002	0	0	0	0
TCONS_00050268	NONMMUT126217.1	9.819464052	18.21071332	8.897850984	15.30266895	13.51452942	10.41788822	9.434208652	4.579126645	6.760404589	5.60992672	7.217873429	4.969778875	3.258727073	3.598592464	5.038465433	3.381608101	0	1.471438454	1.608671329	1.543224351	2.885885501	4.040959843	0	1.253160876	0.444601361	1.831389876	0.385297086	0.329911562	0.534223749	2.161752149	4.693677176	4.225222976	5.955224274	3.679679654	3.486256239	4.206530613	4.787640463	2.695000393	2.145394383	3.130617109	1.000537714	1.011915251	0.754393462	2.975489148	14.1702815	1.267103167	5.806481493	0
TCONS_00392715	NONMMUT039131.2	0	17.55777647	103.900248	77.44834423	162.9493913	196.5354113	18.40635801	44.78316865	59.76684016	24.49049403	37.74343516	5.824983253	23.49523674	0	145.1181523	0	0	0	0	0	0	0	0	0	0	0	0	0	0	0	0	0	2.182273546	0	0	10.98532028	0	0	0	0	0	4.901211521	3.83711947	22.70075058	0	0	0	101.9856756
TCONS_00521436	NONMMUT120536.1	0	0	0	0	2.124387104	5.995481036	0	0	0	0	0	0	0	0	0	0	0	0	0	0	0	0	0	0	0	0	0	0	0	0	0	0	0	0	0	0	0	0	0	0	0	0	0	0	0	0	0	0
TCONS_00251899	NONMMUT143321.1	0	0	0	0	0	0	0	0	0	0	0	0	0	0	0	0	0	0	0	0	0	0	0	0	0	0	0	0	0	0	0	0	0	0	0	0	0	0	0	0	0	0	2.100917209	0	0	0	0	0
TCONS_00251898	NONMMUT143321.1	4.845823223	1.091980591	2.151282362	5.438273178	1.754981092	1.168235259	0.86073199	1.42576181	0.837317449	1.234715625	0.368503212	1.035404133	0.37358789	1.495736708	0	1.571736681	0	1.857090994	2.179909195	5.461673697	5.750587318	1.353443287	6.403100266	2.306295661	0	0	0	0.487175104	0	2.926424565	9.706476011	0	6.445442608	2.37092634	7.92193626	4.390528161	5.715145738	1.321386572	5.015756216	6.59363499	1.640756784	0	0	0.50050207	12.74081379	6.644033612	6.712080173	82.08838057
TCONS_00590351	NONMMUT121214.1	358.1210654	979.7367075	415.9005577	372.2247207	411.0453264	470.050944	369.9605261	141.191335	212.3760674	183.2291666	333.0440943	278.6873725	144.3629605	235.5017188	171.7689798	204.1696931	117.5478674	68.7966249	140.4443468	119.1795308	100.7987614	138.7893011	98.71972639	85.51575611	82.80829853	197.1055738	85.57602406	72.13805244	103.2865525	154.7831415	207.6333746	281.5789629	186.7049127	182.6831251	169.4526731	277.9448296	273.788562	189.1652063	128.4182784	108.7326035	158.9141544	136.2546416	172.6361884	138.4202511	167.1612942	197.963635	145.129429	200.8655085
TCONS_00036651	NONMMUT031856.2	3.734742637	7.834083317	1.925805275	2.88452142	2.637995357	2.464103284	2.523497303	0.843738842	2.04864577	1.369034818	2.815082542	2.590703474	1.838875843	2.090754467	1.361577562	1.414713131	0	3.658256891	3.89179806	4.457575728	2.948626904	5.277951139	4.539984726	3.839727767	3.663460504	7.924423993	5.844764151	3.595859087	3.535359215	3.479207344	9.301803617	7.009644916	4.312023433	4.6417265	5.568458207	6.100932036	5.290050557	5.804132514	4.623149044	3.287012491	4.474654791	3.880694989	3.810441374	5.07680438	6.86669126	6.384255616	7.355679079	13.20727074
TCONS_00053666	NONMMUT020145.2	0	0	0.312046462	0.279504156	0.460791352	0.193385459	0.243855885	0.194239533	0.236030529	0.077874291	0	0.606876399	0.111379582	0	0	0.135248522	4.227011675	0	0	0	0	0	0	0	0	0	0	0	0	0	0	0	0	0	0	0	0	0	0	0	0	0	0	0	0	0	0	0
TCONS_00329117	NONMMUT029641.2	19.5918605	19.71077944	14.71815871	14.14488483	11.22349387	8.957624831	14.47009697	0	11.63932535	4.423546862	12.22204186	11.38558232	5.719145494	28.76411925	0	8.72445409	0	1.309966347	0	0	0	0	0	0	0	0	0	0	23.47138752	21.90759449	12.18725376	11.77404308	0.439622354	0	5.351743449	0	5.245098435	9.33114458	11.5250938	7.27265935	0	38.87803694	4.916965129	19.35468906	10.70662121	9.047051075	9.34953277	30.43962665
TCONS_00356079	NONMMUT136346.1	0	0	0	0	0	0	0	0	0	0	0	0	0	0	0	0	0	92.45650995	93.76406666	17.55113568	21.10520164	52.74404864	82.72806065	42.49822657	61.10337471	46.99265027	87.29387112	73.81828923	90.58872178	37.36480502	54.29684467	33.60191239	12.34861956	0	21.6026293	53.76085695	37.48408296	36.28814932	37.60950212	3.112755157	45.02919982	74.82430242	34.53585834	18.43427108	57.7157729	64.23494305	18.54551243	0
TCONS_00357079	NONMMUT033245.2	0.274286705	0	0.176752354	2.106966502	0	0.081815876	0.052437615	0.189717923	0.145908013	0.02658733	0.223810029	0.422531807	0.317924592	0.644241274	0	0.521462932	0	0.469608017	0.696280183	0.374049061	0.092910898	0.927534777	1.823391651	0	0.205161174	0	0.385297086	0.869687782	0	0.910211431	4.113016082	8.266740604	1.041988412	0.785634864	1.457708605	0.345888724	2.018398171	2.385230233	1.195793591	1.398444703	1.625873785	0.758936439	2.297470996	3.223446577	3.623697942	0.043693213	5.664859993	3.19959076
TCONS_00833785	NONMMUT009005.2	0	0	0	0	0	0	0	0	0.982495922	0	0.257885106	0.593093813	0.449121474	0.706802326	0	0.949378573	0	0.308417674	0	0	0	0	0	0.838121181	0	0	0	0	0	0	0	0	1.073605318	1.427019281	0	0	1.119150471	3.072238494	0	0.732173205	0	0.388322478	0	2.150038867	0	0.369163954	0	2.480642716
TCONS_00090644	NONMMUT080414.1	7.32537504	7.118733387	4.181479541	5.863507178	4.052652915	3.745094456	3.188941127	4.575427146	9.883760144	4.948407352	8.43551189	7.382757423	4.939117507	6.027904426	3.744609181	4.946186519	0	1.330441256	1.368814811	1.430270229	0.653057431	1.314038518	1.562907129	2.846685994	1.511114627	1.01743882	0.385297086	0.492363242	0.133555937	0.644012513	1.140660331	1.824561504	0.916391595	1.261948919	0.439324973	0.159997868	0.102630415	0.123908064	0.281363198	1.478608956	0	0	0.180780106	0.886819745	0.216340176	0	0.460977982	0
TCONS_00815111	NONMMUT135292.1	0	0	0	0	4.224649416	1.399474197	0	0	0	0	0	0	0	0	0	0	0	2.29901301	0	0	0	0.336927008	0	0	5.510030747	21.85641724	15.77290682	4.233280252	0	0	0	10.45908021	0	0	0	3.095772081	0	2.517656977	0	0	3.106919736	9.803181978	0	10.15893984	0	0	0	0.426505448
TCONS_00815112	NONMMUT048727.2	0	13.42361344	0.08138464	0	9.64687229	1.48808079	1.361144151	0	0	0	0.397038991	0.481947828	0	0.054638625	0	0.026642015	0	0	0	0	0	0	0	0	0	0	0	0.687053348	0	0	0	3.99724464	0	0	0	0	0	0	0	0	0	0	0	0	0	0	0	5.497856802
TCONS_00211050	NONMMUT084670.1	0.055186485	0	0.16921092	0.219822825	0.319048434	0.10978327	0.210568487	0.126889671	0.495454975	0.353850781	0.577877494	0.451364573	0.215446899	0.391890226	0.16589012	0.175401168	0	0.031390687	0.048115362	0.174765749	0.093694004	0.077294565	0.131023714	0.191251607	0.069053832	0	0.385297086	0	0.271919888	0.116127808	0.048727143	0	0.16493188	0.367373232	0.48341336	0	0.068796589	0	0.183413635	0.071749748	0	0.252978813	0.070364336	0	0.277131765	0.088675375	0.035405375	0
TCONS_00589030	NONMMUT149857.1	0	0	0.147764968	0	0	0.062275518	0.096527162	0	0	0	0	0	0	0.037818704	0	0	3.81341237	0	0	0	0	0	0	0	0	0	0	0	0.55719537	0	0	1.743363741	0	0	0	0.373008363	0	0.703921712	0.256427384	0	2.827269445	2.182954176	0	0	0	0	0	0
TCONS_00817056	NONMMUT072078.2	15.87955452	33.48006533	6.836515931	7.610158328	14.34507812	6.949413244	7.502060822	3.90009458	0.77851652	2.976212355	3.034696133	0	1.911707068	0	3.671090927	1.419911959	0	0.926839255	0.909942161	0.12166641	0	0	0.149518115	1.095273757	0	0	0	0.012895371	0.584975005	0	0	0	0	0	0	0	0	0	0	0	0	0	0.510861536	0.417808268	0	0	0	0
TCONS_00076170	NONMMUT150550.1	0.127982177	0	0.246402601	0.199066195	0	0.251570183	0.176819638	0.191994538	0.234376904	0.215171265	0	0.31025907	0.317315237	0.391716107	0	0.165240542	11.6008582	8.014132146	7.505012017	2.582791822	4.418490587	4.973781568	13.35061318	6.356080907	6.491179868	7.873552052	3.554365621	6.628010544	7.138831958	7.514174618	9.356724478	1.496831165	3.925281991	4.591833577	7.244284575	3.996240082	5.949485186	6.74490449	8.121056319	7.458962378	0.798178961	4.288496836	5.71446189	5.086846656	9.543468253	4.880247849	4.202228548	0
TCONS_00037324	NONMMUT103862.1	0.056832205	0	0	0.036889973	0.171918427	0.058852887	0.070465667	0	0	0	0	0.020543094	0	0.017638281	0.054177048	0	0	1.087132125	1.894866494	1.392346691	0.705930369	0.514441705	1.616697183	1.204981627	0.992467179	0.406975528	0.192648543	0.943911136	0.400667812	0.51593818	5.751157804	1.366951485	1.673113351	1.980478482	1.41459807	1.411127863	0.650916305	2.753732816	0.609221664	1.293855341	1.554210271	0.424498448	0	0	2.16740405	0.994916299	1.061276114	5.724067869
TCONS_00303758	NONMMUT025928.2	21.83322175	14.07191484	29.31372003	51.17696419	21.86065378	21.22583364	28.21271642	29.9131411	23.68573406	17.2271544	22.26909787	36.66859795	16.69684323	29.53546758	25.0423651	19.38291938	1.33850908	1.356645384	4.072542791	4.194501138	4.861151289	3.202483864	5.600417213	9.473608389	4.075492528	4.06975528	0	1.109601653	2.671118745	0.587844883	1.790371706	1.285937427	1.946426912	2.146110394	0.850377259	0.133331557	0.581572354	1.146149593	1.33647519	2.916075033	0.500268857	1.011915251	0.582940402	0.371936143	1.027615834	0.41508552	1.203782749	0
TCONS_00722385	NONMMUT125435.1	35.42089141	29.11396403	19.08023988	19.55284177	22.16342383	20.78644147	14.77840917	7.80018916	10.51315868	9.068539599	11.62262265	10.38838713	7.246852643	10.1001187	7.075576602	11.00236219	25.42899551	16.13329995	21.57196056	20.85629472	13.33359655	20.59914063	12.22571078	16.3227403	15.85822359	52.32911688	52.81074513	30.35408288	49.71325941	18.11595708	71.50560718	41.85083357	23.31852471	21.68465214	27.46508095	35.3239293	30.47935184	35.00907735	28.22009567	9.433351764	30.41171902	51.59730569	26.70710591	31.12312057	34.55617851	29.38180671	34.78694927	13.75856023
TCONS_00833786	NONMMUT009005.2	0	0	0	0	0	0	0	0	0	0	0	0	0	0	0	0	0	0	0.325042797	0.260205464	0.339927794	0.203578425	0	0.315821893	0.275770811	0	1.068236172	0	0	0	0.439173341	0	0	0	0.557262471	0.637751502	0	0	0	0	0	0.698727481	0	0	1.10917608	0	0.592933814	13.49907341
TCONS_00667384	NONMMUT002168.2	0	0	0	0	0	0	0	0	0	0	0	0	0	0	0	0	0	0	0	0	0	0	0	0	0	0	0	0	0	0	0	0	0	0	0	0	0	0.514961914	0.711708209	0	0.792801071	3.70360982	2.535207809	4.384011323	0	0	0.589251655	0
TCONS_00816960	NONMMUT072085.2	10.63025555	11.37639816	5.496850922	13.44426429	3.580306646	2.424818028	2.413609037	3.742628704	3.006240058	5.006660193	5.241854684	0.895143694	2.188725363	4.958133084	7.045616695	4.675278625	0	0.518530737	0	0.253358792	0	0.274643047	0	0	0.931175279	0	0	0	0	0.914933153	1.000575842	0	0	0	0	0.244850071	0	0	0	0	0	0	0	0	0	0	0	0
TCONS_00813370	NONMMUT133769.1	0	0	0	0	0.307805813	0	0	0	0	0	0	0	0	0.051574126	0.050167946	0	52.17106842	23.59683235	34.34373192	13.32695346	11.65341578	23.71026231	7.514587719	38.27548329	23.2020362	32.02877057	86.0857721	33.33726192	107.1763692	14.77178339	47.84090947	20.8795823	2.03699059	12.23565231	9.167011578	7.239610196	15.55127897	8.870795145	10.88499252	3.428223623	36.23084636	153.9745425	24.67391265	69.20925768	14.78425492	28.49219106	10.79527585	0
TCONS_00491636	NONMMUT137452.1	0	0	0.07119192	0.046401422	0	0	0.01918168	1.809150112	0.627939451	0	0	0.980917651	1.213359207	0.326525855	1.487810083	0.695884381	0	0.02688245	0.062905313	0.013967028	0	0.066457867	0	0.038946085	0.023063535	0	0	0	0	0	0.063243671	0	0.010866451	0.012413672	0	0	0	0	0	0.011481549	0	0	0	0	0.064739798	0	0	0
TCONS_00813376	NONMMUT133769.1	0	0	0	0	0	0	0	0	0	0	0	0	0	0	0	0	0	0.096509665	0.093301545	0.04379863	0	0.027655995	0	0.102142631	0.274009845	1.686099612	0	0.19103142	0.589916575	0	0.522207877	0	0.028528154	0.012405164	0.086263584	0	0	0.054240755	0	0.011584843	0.211113458	0	0.125229315	0.459465116	0.085616625	0.210557592	0	0
TCONS_00813377	NONMMUT067853.2	0	0	0	0	0	0	0	0	0.101454705	0	0	0.0565589	0	0	0.112363197	0	0	1.283083897	3.767932216	1.433891986	0.580898845	1.146232018	0	2.196355473	7.501102844	7.9775343	17.69688782	0.912992236	18.99793141	0.895572197	1.324584732	6.735189128	0.243445707	0.616973981	0.483838513	0.360208533	1.148708031	0.976736292	2.044912551	0.053474618	2.245331697	18.71258981	2.845332103	1.441252556	1.116098966	1.779624552	0.370056979	0
TCONS_00813374	NONMMUT067859.2	0	0	0	0	0	0.094006442	0	0	0	0	0	0.026398178	0.070022891	0	0	0	7.637532812	1.520068974	1.280051093	0.420593659	0.322938373	1.50656382	1.074889378	1.023070408	5.317076663	2.611358475	11.18729355	2.689134601	9.577029148	0.727467524	0.867798005	2.038027117	0.090251082	0.322500231	0.396157752	0.379781606	2.068413394	1.793414342	0.819786847	0.109380624	1.635754095	20.15482202	1.471341575	4.360579346	0.576871078	0.887059604	0.295280827	0.319959076
TCONS_00813375	NONMMUT067853.2	0.49371607	0	0	0.452167051	0.092166078	0.219661991	0	0	0	0.054716726	0	0	0	0.035485506	0	0.15801907	204.9404638	90.25647987	126.2062814	35.1710665	43.05301222	75.5460689	30.08752514	132.3865772	40.50616736	24.62425781	114.5729048	114.5743778	311.5490066	53.46018753	338.1273262	98.63727925	6.818675415	77.56531309	27.14270145	28.59948557	29.57066215	10.24338672	32.56571509	10.66217943	71.87600296	950.7760909	87.62657252	529.0561041	36.14790135	240.446502	24.00094963	0
TCONS_00813378	NONMMUT067853.2	0	0	0.124904997	0.958200206	1.200540261	0.705811927	0.263069028	0.25298885	0	0	0	0	0	0	0	0	262.2032207	260.0229193	318.7208853	150.9386785	98.78826914	267.7160785	115.0450728	366.1637888	351.3590095	241.2011687	921.0594275	368.9398806	1325.795098	83.07746247	117.0219367	151.3169919	10.49573344	43.16917104	48.78739257	41.97434734	93.58980483	56.15615687	63.06703323	22.78468473	161.7247899	635.4111849	139.0825846	108.4971205	49.84445195	105.9291694	42.84099937	0
TCONS_00813379	NONMMUT067864.2	0	0	0	0.039273856	0	0	0	0	0	0	0	0	0	0	0	0	0	1.198575325	1.494793505	0.7574262	0.280405091	0.634464705	0	0.988973224	2.131128792	0.527643772	5.464090629	1.329482716	6.357262613	0.304143357	1.356133985	2.327179333	0.273067949	0.251115234	0.45264644	0.447247374	1.078987768	0.389659884	0.757183536	0.10849865	0.71025671	7.88484364	0.728401178	2.715381805	0.725821289	1.469402742	0.598032188	0
TCONS_00788682	NONMMUT059992.2	0	0	0	0	0	0	0	0	0	0	0	0	0	0	0	0	43.39981842	2.36530079	6.679463816	0	0	0.805563953	0	0	2.572327896	52.10222802	20.26720469	6.071530321	41.17996991	9.221617487	18.93085815	19.16303954	2.088784857	0	10.03425325	5.509819913	21.19797022	18.30239819	25.47912574	0	42.36539322	59.16289007	26.19219808	18.94791489	14.64595946	21.46437811	8.870993722	0
TCONS_00628961	NONMMUT021663.2	27.12415744	24.43331406	9.842641415	18.96903146	24.53167433	10.36808963	5.941622271	4.881220818	4.763993887	4.504611632	5.486534998	7.622272596	3.68241458	6.00253525	5.780582632	5.571657602	4.086468222	2.538826171	5.324742676	3.674924947	4.907852288	4.353477227	9.532821792	4.237421027	4.901573995	5.494169628	4.855513882	2.888982855	7.078464674	4.788053457	8.719787647	8.562689918	6.078253334	5.371835918	6.622554707	9.358541961	8.729537881	8.003252835	5.097597736	4.218162128	4.389984287	5.818512696	2.943300381	4.142996702	10.14424492	5.294219193	6.146125255	6.37454467
TCONS_00033055	NONMMUT056424.2	0	0	0	0	0.167741481	0	0	0	0	0	0	0	0	0	0	0	0	1.065582334	7.570222257	18.97756064	20.76088713	4.425794022	5.886689702	13.55918257	8.111936046	0	0	0	12.71626145	1.90E-05	5.027460528	0	32.36980915	27.73382874	11.94717338	1.918481102	3.607527525	0	4.779164937	4.388986916	0	0	0	0	0	11.16132194	0	0
TCONS_00033054	NONMMUT139470.1	0	0	0	0	0	0	0	0	0.374789049	0	0	0.059335538	0.282025607	0.126741412	0	0	70.83925456	4.919258775	18.9619663	59.41881753	63.88647603	11.758683	11.51159246	25.00764579	14.08281008	8.849275881	5.007706231	12.40096805	16.17442534	13.21566317	13.11205333	14.24745187	52.46125854	28.37069522	20.28986959	19.98256039	8.019369616	1.173068619	8.031793844	24.95114573	7.221380951	6.666750656	8.506026313	19.37588942	3.669129379	5.950971872	7.359184211	0.954437924
TCONS_00475022	NONMMUT042889.2	0	3.228759471	1.871954724	2.291320051	0	0	2.654360616	2.270227904	1.350038206	2.026353389	0	2.785812567	1.674826753	0.833700445	0	0.817859301	0	0	0	0	0	0	0	0	0	0	0	0	0	0	0	1.145586542	0	0	0	0	0	0	0	0	0	1.182928929	0	0	0	0	0	0
TCONS_00813202	NONMMUT149857.1	2.923347706	5.922786178	2.148964942	1.614201216	3.468231758	3.021651208	1.808940409	0	0.558827689	0.209109354	1.558221373	0.193861617	0.448194194	0.584657663	0.156409137	0.206799557	0	0.242526452	0.432317965	0.148159062	0.301834326	0.08049456	0.152383445	1.015642178	0.326514008	0	0.950527912	0.178136049	0.149315538	0.115539964	0.088695982	0	0.023266113	0.133044959	0.04211851	0.031599579	0	0	0	0.09818512	0	0	0	0	0	0	0	0
TCONS_00229832	NONMMUT022630.2	0	0	0	0	0	0	0	0	0	0	0	0	0	0	0	0	0	10.05205353	15.45953292	0	0	26.71145567	0	0	27.8504755	0	0	20.46762212	0	0	0	0	0	0	0	32.25543685	12.52169752	34.16117447	0	0	0	0	5.813184561	0	17.58066803	11.60083197	9.634616849	0
TCONS_00575028	NONMMUT093707.1	0.274286705	0	0.294646174	0.951144878	0	0.40907938	0.440475967	0.158098269	0.635915755	0.181245832	0.279762536	0.765547152	0.688836617	1.149605024	0	0.60058308	4.032927859	4.5488111	6.055644791	4.027476097	4.814948027	4.66587094	19.40609685	2.932155316	3.411368711	0.610463292	6.746166684	8.818934003	4.674457804	6.306836043	8.912034857	5.83025659	11.21364113	6.010940099	7.104437516	11.20961063	7.873634426	10.31897064	9.413251975	6.604600068	5.502957427	1.724303589	7.612515839	5.331084723	10.09746136	3.14682887	10.41002997	34.70084162
TCONS_00586434	NONMMUT048727.2	0	0	0	0	0	0	0	0	0	0	0	0	0	0	0	0	0	0.038100864	0.249748499	0	0	0.101224962	0	0.054106346	0.064181254	0	1.246821371	0.280849175	0	0	0.771698594	0	0	0	0	0.190984122	0	0.091691967	0	0	0	0	0.035730818	0	0	0	0.371402383	1.221283793
TCONS_00272243	NONMMUT059057.2	0	0.165551939	0	0	0.242575183	0	0	0	0	0	0	0	0.052987432	0	0	0	0	0	0	0.239232115	0	0.07437283	0	0.381186744	0.324069171	0	0	0	0	0.489086942	0.542434239	5.167080288	0.56280027	0.796780793	0.298712638	0	0	0	0.231737764	0.087275663	0.156834287	0	0	0	0.669626929	0.399858436	0.234914663	3.64945322
TCONS_00219088	NONMMUT090135.1	0	0	0.065958087	0	0	0.092956471	0.071105406	0.102479298	0.052137797	0.028342094	0.061883473	0.151246266	0.085283272	0.086693981	0.119297859	0.052478133	0	0	0	0.005336846	0	0	0	0	0.085808661	0	0	0	0	0	0	0	0.008566633	0	0	0	0	0.080788058	0	0	0	0	0	0	0	0	0	0
TCONS_00207247	NONMMUT136346.1	0	0	0.279543668	0.374052773	0	0.027394683	0.334489059	0.619049582	0	0.408700443	0	0.557319454	0.080699859	0.121065124	0	0.153073073	10.09503548	20.68707846	27.2671483	15.19998579	12.0265924	27.75151588	30.42993205	31.22492542	14.0510101	0	4.091084462	9.566715549	17.93789793	14.44433483	5.41098718	3.064205184	11.56180667	8.509755342	14.65718491	6.686097572	4.683641642	9.98317979	4.264797841	6.129653285	2.40279132	1.356978352	8.136647841	0	10.89478307	7.822024472	2.476251924	0.676713446
TCONS_00594710	NONMMUT053160.2	0	0	0	0	0	0	0.005327662	0	0.024318002	0	0.028032206	0	0	0	0	0	0.66925454	0.083444127	0.168643862	1.611969317	1.09150396	0.210689524	0	0.073168364	0.053683841	0	0.105956699	0.207105649	0	0.48110363	0.810070614	0	2.777963436	0.786213431	0.328416675	0.924174352	0.322772657	0.251595324	0	1.464354355	0	0	0.295722237	0	0.776607145	0.056407938	0.225461428	0
TCONS_00269274	NONMMUT118952.1	0.15782457	0.884047356	0.203088455	0.422440764	0.117110645	0.203980615	0.06368024	0.092677205	0.416956464	0	0	0.226054517	0.177057504	0.14326533	0	0.248232157	0	0	0	0	0	0	0	0	0	0	0	0	0	0	0	0	0	0	0	0	0	0	0	0	0	0	0	0	0	0	0	0
TCONS_00223365	NONMMUT022630.2	0	0	2.973877998	0	3.688282661	0	16.17004055	10.97638338	0	8.347198737	0	0	26.59953194	7.325806827	0	1.27889574	0	0	0	0.740936713	0	0	0	0	0	0	0	0	0	0	0	0	0	0	0	0	0	0	0	0	0	0	0	0	0	0	0	0
TCONS_00712547	NONMMUT118584.1	1.188594009	0	3.215753776	1.599295933	1.874043582	1.591850593	3.397107971	0.351452452	0	0	0	1.044458386	0.434602918	1.516927022	1.205330956	0	0	7.911903698	6.544121354	0	1.131707833	8.473895883	0	2.255334548	11.95619483	65.47585085	0	6.551987836	19.35238886	5.006788641	10.69379342	33.14393496	3.218143998	3.15334505	2.704144413	4.249943368	9.459479606	0	2.031371947	0	14.52380546	4.365908353	8.238662412	24.6524235	11.73212772	1.400345619	5.587570059	6.531324617
TCONS_00842940	NONMMUT154407.1	0	0	0	0.015868468	0.047429811	0.017481326	0.033675436	0	0	0	0	0	0	0	0	0.078203638	0	0	0	0.363548702	0	0.952485462	0	0	0.196510211	0.868485777	0	0.089967702	0.196861452	0.939091681	0.616274974	0.367410694	1.300528066	0.359468982	0.81738537	1.256329926	1.553174498	1.926305741	0.040797664	0.009828841	0	0	0	0	0.328188046	0.175974414	0.511005777	26.03794964
TCONS_00390381	NONMMUT152870.1	19.41949874	5.628765934	11.18497735	29.24475524	13.01911236	11.36944777	6.9742133	19.35129137	23.53982605	19.00994126	18.12861233	25.41227012	14.96902904	25.42350188	19.6662683	22.31742833	0	1.127153163	3.025505463	1.683478495	3.079458722	1.020288254	5.991143995	2.305348517	0.769371499	1.239443971	2.504431061	1.954008511	0.801335623	0.70209538	2.499794398	2.972352511	2.843363094	2.067527339	2.466738866	0.453327293	0.273681108	1.505854702	0.178419438	0.794570854	0	0	0.624226299	0.247957429	2.650924342	0.794167833	0.10763234	0
TCONS_00279205	NONMMUT064966.2	0.100663221	0	0	0	0	0	0	0	0	0	0	0	0	0	0	0	0	0.109262132	0	0	0	0	0.448814831	0	0.07286641	0	0.291091949	0	0	0.162833032	0	0	0	0	0	0	0	0	0	0	0	0.252978813	0	0	0	0	0	0
TCONS_00751181	NONMMUT096143.1	46.73845459	17.05184974	15.87997158	42.74341539	23.65756048	12.71315081	12.53716258	7.114422108	6.809040593	5.423815407	8.225018558	12.75643647	2.569890456	5.049458638	1.62531143	8.6449863	0	0.866165899	1.033231772	1.317877159	2.110185685	0.371013911	0.130242261	1.274772439	0.222257939	0	0	0.989644718	0.133555937	1.706646433	3.193636016	6.062276443	2.546999261	5.259883141	2.820182893	1.626644991	2.018398171	1.517873785	2.637779979	1.970535717	4.252285284	2.782766942	1.09729958	0.123978714	3.569666983	1.398204652	1.628647248	16.63787195
TCONS_00011487	NONMMUT135292.1	0	10.87874903	0	0	143.5718736	0	30.38939134	1.043511815	0	2.712598974	0	0	79.82757996	0	32.99138406	0	0	0	0	0	0	0	0	0	0	0	0	0	0	0	0	0	0	0	0	0	0	0	0	0	0	0	0	0	0	0	0	0
TCONS_00011485	NONMMUT135292.1	71.09747289	42.05433137	107.9711493	54.53295247	10.70695785	94.70208112	70.97618935	80.83339997	145.3812848	62.08317131	167.4239456	83.63598616	92.04205734	220.6809657	81.90746116	121.8673251	116.9562464	42.62713373	48.6950749	78.31151319	108.8549194	54.89220372	89.97460979	122.5274276	70.24610888	54.11451852	0	26.20615199	17.68440876	67.23090901	52.83203029	27.54202411	63.67669337	86.41125859	87.3335248	29.04057302	18.18090968	47.20110424	23.39552575	84.41794877	16.54514177	42.74304724	20.04882921	37.82268234	70.11498556	42.12792517	24.90955777	0
TCONS_00011489	NONMMUT135292.1	8.737457856	7.332460941	2.542317486	0	4.936643102	0	0	0	0	0	0	0	0	0	0	0	0	1.113764117	0	0	0	1.54225845	0	0	0	17.18779747	9.958195844	3.424170723	3.095559514	2.840333733	9.654216512	12.16607029	0	1.389140138	3.511935492	2.896388071	5.729377155	5.674586633	4.392853266	0.914725858	2.16303747	6.658402355	3.655653552	5.191980605	3.356031059	3.617142611	3.354730088	0
TCONS_00815107	NONMMUT135292.1	0	0	0	0	0	0	0	0	0	0	0	0	0	0	0	0	0	8.249217919	19.12086224	0	0	7.431516842	0	0	69.0681931	65.98904699	45.92355972	16.00861291	0	0	73.05718201	0	0	0	0	0	37.127887	75.52441223	2.447015731	0	0	0	49.27578073	0	0	65.21137712	24.2853256	0
TCONS_00376504	NONMMUT057411.2	0	0	1.126766799	0.436382862	7.164399869	6.622940626	0.215120072	0.47129094	0.815917607	0.323567811	0.724305206	0.335771943	0.473681149	0.427201613	0.136363629	0.171577106	0	28.2336793	37.10162569	1.137382283	2.429347893	32.45224666	5.330425006	11.67726104	45.22545565	15.99088245	5.949564958	53.17418047	44.6281171	15.55665112	83.49625877	50.38376323	4.98738078	2.116909761	14.97977699	35.08555914	20.31285131	48.27281607	2.932402418	2.552995882	36.27699616	0	38.40932586	17.29366691	21.66544097	26.13406837	26.27301876	0.573046705
TCONS_00038829	NONMMUT023055.2	0	0	0	0	0	0	0	0	0	0	0	0	0	0	0	0	0	0	0	0	0	0	0	0	0	0.203487764	0	0	0	0	0	0	0	0	0	0.06629245	0	0	0	0	0.660980227	0	0	0	0	0	0	0
TCONS_00832000	NONMMUT059992.2	0.07696485	0	0	0	0	0	0	0	0	0	0	0	0	2.439915826	0	0	0	22.8583894	32.05664359	77.83347773	127.0322332	23.76398204	11.42485111	111.5608582	38.24320541	32.7715009	0	24.08933193	0	19.87956757	26.15447571	8.674015358	45.42177089	64.03668193	52.54909139	13.59227221	17.8408267	20.96369559	10.76970395	17.9682187	15.51496313	8.032583266	9.959228154	25.32847943	24.61523927	28.34031345	34.44971308	0
TCONS_00294613	NONMMUT015260.2	0.969384074	0	0	0	0	0	0.523180574	0	0	0	0	0	0	0	0	0	0	0.843478614	0	0	0	0	2.471607383	0	0	0	0	1.455857347	0	2.161998664	5.147028325	4.090566956	0	0	0.92742919	1.926640994	4.698454632	1.391983192	1.862940903	0.395211597	3.120176861	0	2.505134942	3.186748877	3.253269476	0.839870934	0.85599575	0
TCONS_00706701	NONMMUT139470.1	0	0	0	0.088408314	0	0.101219875	0	0	0	0	0	0	0	0	0	0.114279392	6.262883986	7.23555336	12.10639161	9.74777245	18.31784151	6.499328932	5.176478654	11.7498218	17.23699216	8.159655848	3.643754545	4.503303314	0	3.482317233	6.883785656	11.09874223	23.18155533	6.170377938	13.97522501	19.49723353	1.811768935	0.752927351	4.32979274	3.623997935	0.581437479	0	3.355473536	7.737759529	0.260960337	0.213397651	3.911019339	0
TCONS_00833223	NONMMUT023203.2	0	0.457254456	0	0	0	0	0	0	0	0	0	0.077001392	0.576026374	0	0	0	0	0	0	0.303433919	0.165182304	0.107563116	0	0.150863957	0	0	0	0.318935502	0	0.087721627	2.569280175	0	0.703282636	0.488693694	0	0	0.917276444	0	0	0	0	0	0	0.822226835	0	0	0.307495681	0
TCONS_00416132	NONMMUT057411.2	2.745445349	0	0	0	0	0	0	0	0	0	0	0	0	0	0	0	0	6.036727578	14.44147525	2.147058853	1.211219652	17.49035323	0	0	24.9902039	0	5.435000699	10.68315475	0	0	0	0	3.359750223	0	2.107923737	0	0	5.936497303	34.41754215	0.12099725	0	0	3.857350931	3.454418922	0	0	0	0
TCONS_00626531	NONMMUT056424.2	0	0	0	0	0	0	0	0	0	0	0	0	0	0	0	0	0	8.170960352	9.072170641	5.005756503	2.348940147	4.087893103	24.32313292	6.635738579	0	0	0	11.60181495	18.97509334	1.400511989	0	0	1.507519064	6.179686065	3.510348254	5.748936727	0	0	0	6.833015351	16.30488765	11.76022607	0	8.813398856	14.37272182	8.21722958	0	0
TCONS_00692017	NONMMUT027920.2	1.632444756	0	0.343685133	0.394123134	0.291839728	0.440605765	0.312559649	0.065926978	0.09688292	0	0.27360776	0.095331224	0.053782244	0.03461491	0	0.076718259	0	0.136781162	0.381249415	0.047009861	0.062097663	0.031134251	0	0.111048167	0	0	0	0.150006148	0	0	0	0	0.180338423	0.040031754	0.066947457	0.127118306	0	0	0.195019866	0.083509397	0.125067214	0	0.069609942	0	0	0	0.463633385	0
TCONS_00831118	NONMMUT139470.1	0	0	0	0	0	0	0	0	0	0	0	0	0	0	0	0	0	0	0	0	0	0	33.37223496	0	0	0	0	0	9.517196088	0	23.0130508	0	0.616313818	0	0	0	0	0	0	0	0	26.97740763	0	0	0	0	0	0
TCONS_00206624	NONMMUT054838.2	12.47735708	2.99301351	16.73517802	43.81887129	14.15668613	17.57625921	14.27608828	18.51801864	9.241035348	9.649632293	9.235912506	37.47861154	10.44467066	26.58625291	8.61615513	17.91952057	5.241601558	1.654919525	4.815785872	15.33571958	14.57543698	4.011958922	7.47772916	4.313937158	0.786929876	6.151842081	0.357940993	2.133524065	0.472120238	8.155646124	17.76111637	4.322770515	29.67998305	20.02245376	14.14690187	9.37864836	8.679659499	6.156743887	11.00341126	23.87450222	0.439236056	2.011940499	1.580042815	0.445331542	7.127813851	4.62055724	12.70829907	23.9969307
TCONS_00422892	NONMMUT058095.2	168.81085	19.16131255	16.9012565	17.71415833	6.710322861	15.88850678	13.10032159	14.18856078	76.38080194	34.84500962	136.5347485	70.52094091	62.7201901	183.124938	21.95465262	121.0675273	34.32204984	59.32011251	71.01339979	55.15398862	65.51572172	54.68712579	105.8144131	90.5111187	101.5096457	90.98161765	39.98304924	69.56521609	44.35352609	51.53150639	108.5415266	47.38385491	36.63630514	54.1450781	42.88687554	44.58073928	53.33839534	39.99142061	17.00720951	50.19404199	30.1714649	52.33069127	30.08263945	25.08076996	54.84726443	48.30636391	26.0941154	2.310744447
TCONS_00624903	NONMMUT150254.1	0	0	0	0	0	0	0	0	0	0	0	0	0	0	0	0	0	0	0	0	0	0	0	0	0	0	0	0	0	0	0	15.44153663	0	0	0	0	0	0	0	0	13.69035754	0	0	0	0	0	0	0
TCONS_00600560	NONMMUT031618.2	0	0	0	0.037034451	0	0	0.010739224	0	0	0	0	0	0	0	0	0	0	0	0	0	0	0	0	0	0	0	0	0	0	0	0	0	0.127740337	0.263137523	0	0	0	0	0	0	0	0	0.10088298	0	0	0	0	0
TCONS_00821411	NONMMUT048727.2	0	0	0.107799297	0.053035357	0	0.039762516	0	0	0	0	0	0	0	0.054708273	0	0	2.67701816	0	1.757651279	0.011385272	0	0	0	0.026722566	0.038860946	2.076185656	1.146836777	0	2.270450933	0.157390727	0.329138063	0	0.014848335	0	0	0	0.151243022	0	0	0	1.507435133	2.066583922	0.160788679	3.554221787	1.982433199	0	1.39798123	0
TCONS_00198053	NONMMUT090143.1	3.963552607	6.70237026	6.0979464	4.704362566	4.704178471	12.38309193	3.174636145	2.852187633	11.17815876	7.20601734	13.26342993	4.789297432	7.110198055	12.28134553	6.006555098	6.631080656	4.401017856	0	3.606371204	2.163119567	2.092260518	4.286122743	0	5.86887956	3.485329314	0	0.424404741	0	1.310050188	2.353996388	6.94078722	0	1.296575953	0.659566746	1.107694147	1.262089849	0.429371448	0	0	0	0	0	3.530664272	0	2.568390565	0	1.618627527	0
TCONS_00078673	NONMMUT116832.1	0	0	0	0	0	0	0	0	0	0	0	0	0	0	0	0	14.57368687	16.88655121	20.18864391	48.61868742	81.24493288	26.9090515	31.9260249	7.803769675	18.18261421	7.259222493	5.365261927	21.22889883	7.204541479	32.35141734	14.20364779	13.88977756	58.41363223	53.02372104	37.79429131	51.49446049	42.23180019	46.05287919	11.77248239	32.21916479	6.488862277	5.338864867	18.71427289	9.00395414	27.20564245	23.47385081	39.65299319	117.5228884
TCONS_00403816	NONMMUT041507.2	1.53600555	0.591185975	2.001416004	9.728165334	0.780737635	1.431777832	1.709466253	1.897179229	3.550476945	1.555412005	1.846432738	2.997963775	1.351179518	4.074495234	0.216708191	1.264168363	1.487083588	1.848398028	3.775087095	8.790994517	12.63313466	6.256082937	8.59598921	2.457385979	1.194038033	1.220926584	0.878670005	4.397531286	5.227245828	11.27131882	10.08288956	24.60273857	17.8315998	10.22431407	12.01998795	30.43898106	23.49374419	14.67629065	5.597404287	8.056884891	3.006740898	2.310961456	11.02844372	4.835169865	11.04010959	10.13691273	12.25695135	5.759583326
TCONS_00812030	NONMMUT040796.2	5.788656344	4.38795415	2.864890533	3.364982021	3.464289033	2.6938559	2.223963158	1.530644202	2.221400857	1.653785127	2.009925964	1.591154183	1.156795124	2.770916545	0.616047209	2.256433312	6.161157296	3.191320422	3.632949899	4.107939317	2.198776226	4.49038136	2.001432821	2.673096538	2.74425296	8.782531894	7.675695905	5.530344606	9.489950677	3.688138793	11.30135848	8.380454214	4.261539094	3.950925627	4.7583713	7.076865698	7.922041772	5.575862883	5.136988584	1.671506922	7.873106204	6.802347299	4.07862825	8.244088599	8.708016579	5.726869385	6.650049956	4.048762147
TCONS_00092984	NONMMUT084795.1	0	0	0	0	110.6943872	0	0	0	0	0	0	0	0	0	0	0	0	1.278471302	0	0	0	0	0	0	0.397021065	7.16846695	0	1.099105421	0	0	1.243824452	1.677229816	0	0	0	0	0	0	2.695107731	0	0	3.53740274	2.999091206	2.603553004	4.2932167	0.582605298	0	1.279836304
TCONS_00581208	NONMMUT059992.2	0	0	0	0	0	0	0	0	0	0	0	0	0	0	0	0	0	0	0	0	0	0	0	0	0	0	0	0	3.127479383	0	0	0	0	0	0	0.846228724	1.255341032	0.922619445	0	0	6.506871956	17.62098623	5.160908542	16.82205188	0	1.995753028	0	0
TCONS_00750024	NONMMUT085832.1	2.453439722	0	1.637561464	1.808836762	1.142297234	3.047327757	1.434839975	3.513639171	14.34839943	4.352930912	8.737711382	9.998832927	7.738708481	10.35978276	1.287192476	6.842921022	0	0.837686781	0.925332354	0.227299474	0.134634528	1.179824236	1.305157695	1.244874856	1.107767759	1.646826474	3.083339933	0.483936267	0.935158673	0.192339053	0.441108878	0	0.373716587	0.865068753	0.82865193	0.053839283	0.270123254	0.062108917	0.283614103	0.178484451	0.125067214	0	0.089841403	0	0.111144765	0.67226377	0.283243	0
TCONS_00750025	NONMMUT109520.1	0	0	0	0	0	0.317854679	0	0.226871016	5.152401017	2.149426141	1.898748332	3.146030993	2.331632468	2.025947277	0.695524938	0.961024579	1.400080498	0	0	0.072772688	0	0	0	0	0	0	0	0	0	0	0	0	0	0	0	0	0.187300508	0	0	0	0	0	0.081954562	0.124102693	0	0	0	0
TCONS_00268515	NONMMUT101299.1	8.128102512	0	13.79766191	14.32758893	15.03739722	11.95647668	12.48721051	11.29257992	12.9075578	10.93528924	7.448006091	12.34975966	10.27315034	14.32078705	13.27500199	15.72134889	0	0	0	0.314960594	0	0	0	1.205702409	0	6.029342447	0	0	0	0	0	0	0	0	0	0	0	0	4.126789193	0	11.94554483	0	1.784723477	10.56087884	0	2.0931452	0	0
TCONS_00432887	NONMMUT136346.1	0	0	0	0	0	0	0	0	0	0	0	0	0	0	0	0	20.71610503	0	3.345434203	0	0	3.700106272	0	0	4.542234199	22.61176382	0	4.446623662	15.97582766	3.004987189	7.411364649	0	0.772091085	0	3.448502635	5.527579676	5.105110548	5.676971863	2.40199762	0	16.14317575	27.11426916	9.822374322	6.263528635	2.548216844	6.480184064	5.174460144	0
TCONS_00432882	NONMMUT011099.2	0	0	0.028221459	0.01824031	0	0	0	0	0.541221455	0.178055352	0	0.0293559	0	0.241102944	0	0.157134163	19.10320159	0.392717531	1.4781308	10.71379179	10.66720641	3.879847052	0	9.803101324	5.635264547	0	2.116822192	2.024213307	0.651752974	3.905963766	0	3.020483312	36.48605785	12.32775513	18.12106392	2.058079242	8.11912638	1.662164725	0	7.506724032	0	1.652204627	0.965315015	4.516792526	0	0	1.751503899	0.587764823
TCONS_00806532	NONMMUT034071.2	17.119111	16.82520914	6.098388281	4.658671493	9.174252762	5.816154272	4.429331938	1.595369633	1.284039148	1.717142736	1.750474188	1.115644936	0.794679013	0.621013765	0.597193596	0.785876242	0	0.073050136	0.072028984	0.679722631	1.061400829	0.527999172	0	1.068723941	0.324838526	0	0	0.119956935	0	0.171442116	1.059754885	0	0.233137464	0.813014711	0.85406192	0.301115988	0	0.402701208	1.070692479	1.029215573	0.625336071	0	0.068581224	0	1.008848324	0.021846606	0.205138742	0
TCONS_00637982	NONMMUT059311.2	0.877717457	0	0.883761771	3.682351375	1.210143334	0.368171442	0.90192698	0.347816192	0.389088034	0.265873304	0.615477579	0.18108506	0.185456012	0.43531557	0.216708191	0.237028605	1.33850908	1.03110267	1.034336217	2.711418939	2.031430426	0.995646747	1.432664868	0.422962347	0.410322348	0.203487764	0.385297086	1.977340135	0.801469179	3.483151594	3.967850808	20.39019126	4.894063275	2.858190633	5.497089157	9.064492546	11.0443669	5.637816915	2.637463446	2.707738555	4.12721807	3.794682193	2.161714464	1.487744574	9.619565909	3.367217434	7.85999324	2.560632485
TCONS_00258424	NONMMUT096583.1	8.338315843	1.655519392	5.006913035	3.575040561	5.504200326	3.605898379	11.3456646	4.798250846	8.22308378	9.046950686	7.197618621	3.92212132	7.881748054	6.481902994	5.882164596	10.35715453	0	0.898224473	0.456183568	0.173333467	0.205737911	1.329466513	0	0.833963278	1.094192928	0	1.541188345	0.479827742	1.202003435	0	0.338718971	0	0	0.425417148	0.581042707	0	0.102630415	0.30977016	0	0.047674251	0	0	0.068581224	1.363765859	0	0.152926244	0.035405375	0
TCONS_00694307	NONMMUT075201.1	0	0	0	0	0	0	0	0	0	0	0	0	0	0	0	0	0	45.71111219	94.98968785	12.05630967	17.62180615	55.81927473	11.56538251	56.16856453	39.41236765	0	8.076790172	48.2047245	0	8.776505134	0	0	0	0	1.982120905	0	22.30353927	9.439378274	7.848837425	0	0	0	0	0	0	8.846499229	6.519828987	0
TCONS_00258423	NONMMUT025143.2	23.48530543	24.83279089	11.04782734	9.15482965	15.24971882	9.464392367	9.445682002	2.853705376	3.060469202	2.412188728	3.041690196	2.555210803	2.424307486	1.948673148	3.327933507	1.242804185	1.33850908	0.939216035	1.776834998	0.114035176	1.327617098	0.558499607	0.911695825	2.927109839	1.042919731	0.406975528	0	1.31952629	1.202003435	0.056888214	0.145165273	0	0	1.06354287	0.014171773	0	0	0	0	0.031782834	0.125067214	0.505957626	0.822974685	0.247957429	0.054085044	0.196619457	0.106216125	0
TCONS_00302763	NONMMUT008245.2	1.637546488	0	0.277903799	1.246469343	0.331579274	0.261974435	0.338432368	0.640456088	2.497167001	0.78161434	2.239611006	1.169386957	1.722594923	1.908155595	0	0.863937662	0	0.435399682	0.283097919	2.443632416	2.908874312	0.675585413	0	0.564777802	0	0	0	0.887141516	0	1.167820229	1.856421906	0	1.760871104	2.532661431	2.296578383	2.796816065	5.298124149	0.804442129	2.185488639	1.821156397	0	1.571251407	1.489687052	0	3.274957579	1.039308603	2.516224593	15.44506451
TCONS_00583912	NONMMUT047247.2	0.254647777	0.545990296	0.391565382	0.237930697	0.145373348	0.214793947	0.30849049	0.189275248	0.507954428	0.122753705	0.253408905	0.138751397	0.090846952	0.195344402	0.245638734	0.21759226	4.616517818	0.981292913	2.743223873	2.8649559	2.277166479	1.579622642	0.633889083	0.891840329	1.434965638	0.683108424	3.156739028	1.129874375	1.000066858	6.192357993	5.192271501	3.792413179	7.260329646	3.792576856	9.394922037	5.689550852	21.0744032	3.604547537	3.696725545	2.246871569	2.037094786	2.631232633	5.890955669	7.765034846	7.762988607	2.213323381	5.171769336	21.73066056
TCONS_00583913	NONMMUT149391.1	12.98758521	9.317428692	9.76577378	15.5607302	11.21385176	10.96066838	9.030218777	13.56723458	18.41013805	14.02080211	17.46747751	15.35885011	18.66871753	14.87565291	21.35339574	15.27679384	7.01378758	8.225080067	15.18855988	13.24314217	12.7708087	9.027510473	14.66072008	5.582818242	6.324794156	5.914168373	5.980196077	7.517341274	10.15906592	10.85218541	19.36349905	13.63185526	19.15886231	22.89316016	22.53875996	17.2577967	23.25362323	22.62012957	20.3079867	14.51774709	32.66405448	17.32601294	13.39271283	8.073369909	20.32353695	10.52956178	14.50908725	15.09438937
TCONS_00130767	NONMMUT102675.1	0.195401849	0	0	0.296143172	0	0	0	0	0	0.207035542	0	0.251185099	0	0.294505322	0.126882646	0	0	0	0	1.176715296	1.220411195	0	2.968872334	0.446420543	0	0	0	1.267315034	0	0	1.274502713	0	0	0.652445263	0	0	0	0	0	0	0	0	0	0	0	0	0	0
TCONS_00667809	NONMMUT090301.1	0.174720631	0.165551939	0.111520916	1.407128548	0.196980105	0.377757536	0.464964333	0.865271827	1.474351832	0.659073334	0.534850016	0.882870151	0.900971801	1.847753623	0.135930213	0.147257971	1.81903384	0.886995623	0.994624237	3.269575511	4.37070784	1.538393721	0.65329518	0.797209325	0.277326617	0	0	1.244463238	0.378898194	2.578534171	0.742375209	1.538164868	4.730285025	2.57307606	2.410632815	0.920147739	2.748066215	2.733349939	1.37966444	0.2798558	0.299160776	0.314705643	1.434376295	0.15236984	1.2194014	1.488300057	1.53868219	3.55602517
TCONS_00130768	NONMMUT010052.2	0	0	0	0	0	0	0.128115581	0.080060963	0	0	0	0.051649483	0.066340265	0.137989516	0.273702445	0.124408414	41.82439323	17.43925898	22.39618823	41.85092324	57.21589163	29.71535434	11.70500222	9.329159993	14.28379964	10.37299226	1.986977074	17.48843165	2.300901687	59.11189889	38.56025159	43.79700802	91.64163793	50.84045471	63.93847795	134.0987464	110.1496329	94.50870747	40.56814165	59.45077654	33.2316095	14.31480613	44.80421636	28.13250602	63.04104041	48.76070778	46.89459616	14.60165239
TCONS_00112781	NONMMUT075201.1	158.8053647	42.57648218	130.1683482	66.80537016	99.05921037	125.9910357	33.21844262	49.71172409	138.7426647	77.19333611	197.3293298	79.73056491	87.79233282	198.6101477	97.02497036	137.5804096	40.44572888	17.01893893	22.16903282	57.58182488	53.11686853	30.56352306	48.09768545	91.40057628	43.30791674	30.85790197	40.21018187	11.40928407	0	54.53759342	54.23423005	30.82134826	68.6354418	66.39848733	50.42803042	49.2121709	28.63946218	39.08162565	4.944500986	81.83304292	0	20.89604994	49.24574216	94.95455356	28.28626162	40.20658168	17.37777235	36.87656334
TCONS_00545012	NONMMUT022337.2	0	0	0.353995687	0	0.179881951	0.237034229	0.018363653	0	0	0	0	0.023862987	0	0.162435861	0.069617506	0.084556004	0	0	0	0	0.009603005	0	0	0.273075318	0.075978021	0	0	0.030049212	0	0	0.396397973	0	0.096852823	0.036066866	0.090515116	0.293329425	1.116345239	0.557586288	0	0	0	0	0.044954992	0.719696438	0	0.592305191	0	0
TCONS_00174084	NONMMUT139616.1	0	0	0	0	0	0	0	0	0	0	0	0	0	0	0	0	24.15205784	1.967386264	1.199066504	0.523895844	0.851787206	1.48479767	0	0.617299618	1.156014828	0.381743045	0	3.643212087	0	0	0.80774797	7.816662505	0.856834514	0.061387694	0.533708984	0.225756992	1.233172862	1.910042807	0	0.011680192	0	0	1.633364716	0	3.829221109	1.405217413	0.156279325	0
TCONS_00174086	NONMMUT038240.2	0	0	0	0	0	0	0	0	0	0	0	0	0	0	0	0	0	0	0	0	0	0	0	0	0	0	0	0	0	0	0	0	0	0	0	0	0	0	0	0	0	0	0	0	0	0	0	0
TCONS_00173610	NONMMUT147127.1	0	0	0	0	0	0	0	0	0	0	0	0	0	0	0	0	0	0	0	0	0.043827398	0	0	0	0	0	0	0	0	0	0.667760258	0	0.055098859	0.038985227	0.158426254	0.100771991	0.285962548	0.327489013	0.21728273	0	0.183723738	0	0.375927978	0.226137175	0.594070122	0.091406201	0.378023188	0
TCONS_00173611	NONMMUT147127.1	2.194293643	0.662207757	0.158527223	0.275735696	0.740373499	0.081815876	0	0.126478615	0	0.079761991	0	0	0	0	0.162531143	0	1.33850908	0.07382238	0.360144922	0.492755118	1.183611842	0.016803838	0	0.047655044	0	0	0	0.029989234	0	0.586782969	1.295358124	5.992468411	1.376965359	1.790308508	3.427032398	0.121278384	0.9113923	2.169692156	0.455315995	1.473801802	0.435233906	0.505957626	0.390535779	0.277960278	4.544009049	1.243050054	2.301313967	5.439304291
TCONS_00813058	NONMMUT149857.1	14.4159058	20.48092706	1.531146727	0.058055957	15.63056263	1.518557204	0.734955126	0	0	0	0	0.027021915	0	0.051208475	0	0	0	1.134854735	0.395006951	0.02881897	0.185941253	0	0	0.697467317	0.827945014	0	0	0	0.835793055	0.175026073	0.55898308	0	0	0	0	0.816389121	1.009335926	0	0.575915295	0	0	0	0	0	0	0	0	0
TCONS_00827649	NONMMUT072112.2	16.91339597	14.46741842	7.41355345	1.557854912	7.712321541	3.531118668	0.811409169	0	0	0	0	0	0	0	0	0	0	0	2.746513197	0.70442265	1.798794809	0.660930364	0	4.442724915	0	0	0.274716823	0.065526476	0	0.876799086	0	0	0	2.784797666	0	0	0	0	0	0	0	0	0	0	0	0	0.076723448	0
TCONS_00272871	NONMMUT009005.2	0	0	0	0	0	0	0	0	0	0	0	0	0	0	0	0	0	0	0	0	0	0	0	0	0	0	0	0	0	0	0	0	0	0	0	0	0	0	0	0	0	0	0	0	0	0	0	1.313432007
TCONS_00152093	NONMMUT017298.2	0	0	0	0	0	0	0	0	0	0	44.95224428	5.368085526	12.0386121	0	0	2.438645102	0	0	0	0	0	0	0	0	0	0	0	0	0	0	0	0	0	0	0	0	0	0	0	0	0	0	0	0	0	0	0	0
TCONS_00173767	NONMMUT109394.1	0.109714682	0	0	0	0	0	0.040083313	0	0	0	0.111905014	0	0	0	0.218496033	0	0	0	0.789725786	0.840407317	2.641728934	1.326405648	5.975384682	0.583166693	0.488505852	5.385507162	0	0.8615607	0	1.449682369	2.313208633	0	1.131815256	0.611307425	1.625899211	3.56864578	0	2.094727777	0.424647406	0.766172891	2.02971582	0	0.63214743	0	0	1.687213407	0.628941081	0
TCONS_00422405	NONMMUT000238.2	0	8.286040111	0	0	30.01401401	0	41.10322462	21.0549267	0	9.278978319	0	0	60.58063708	19.29586194	17.39695431	3.526037531	0	0	0	0	0	0	0	0	0	0	0	0	0	4.745576923	0	0	0	0	0	0	0	0	0	0.022462518	0	0	0	0	0	0	0	0
TCONS_00422407	NONMMUT075201.1	1.403799358	0	0.505747403	0.399516968	1.241372839	1.51626636	0.733277123	1.067100077	1.665345421	0.909233526	0.697000382	0.659833718	0.706242989	0.956715705	0.462726164	0.444381229	0	31.5660491	32.64351175	3.656223178	6.026552595	36.6736584	31.48762945	16.8781241	46.73525383	94.0190795	53.26192802	41.54330595	4.84781341	32.55118979	55.54468536	56.77615818	3.895510894	3.847676885	23.19219208	6.943240812	22.64841167	51.13122022	6.792670321	6.067406605	5.532973558	14.85213312	25.91132368	34.71912318	12.21370096	33.1706418	25.10726138	34.86146108
TCONS_00495346	NONMMUT120536.1	0	0	0	0	0	0	0	0	0	0	0	0	0	0	0	0	0	25.53520727	26.81478227	0	0	0	35.20252945	1.404525211	4.163130543	0	17.52485267	0	25.56060305	2.640333734	0	32.33948924	0	0	0	0	0	0	15.20525408	0	0	0	0	0	0	0	0	37.19332283
TCONS_00329640	NONMMUT028404.2	21.95313989	14.19276775	26.55574503	18.9487805	20.18140423	41.55207444	28.29449812	60.66960998	71.32513793	39.82500272	51.16761664	56.21912454	43.10297105	42.64421044	28.22775879	51.62697928	4.015527241	0.62915995	0.791766607	1.573398059	2.50195776	0.780041288	1.739515635	3.010387029	0.97978138	0	0.239076842	0	0.406677829	1.276154352	0.594838902	0.918526734	4.961807407	3.913820744	2.205198789	2.381941593	4.022154404	1.200762072	1.758555157	2.04777595	0.406593514	1.751372322	0.549095568	2.148427143	0.388979636	1.187363054	0.242845467	0
TCONS_00495343	NONMMUT023400.2	81.00081382	25.96168956	71.97113319	43.5945817	19.20255442	68.49499696	40.34310993	52.39272292	132.0575001	67.68831231	148.8617014	114.376825	98.0767165	243.0108906	50.72033532	178.8547063	92.85371341	101.4424489	135.6326906	94.66426689	132.6791983	157.7312153	248.6491468	187.6949325	193.3768017	169.5276911	45.15990089	137.0199698	54.99793429	153.6721716	241.359429	43.46248058	121.0621733	88.38836777	119.5658627	97.20907799	129.9378717	109.9096435	27.3504372	105.3231636	23.43234313	69.60965015	84.20663263	70.46528604	136.690105	148.8284545	93.95520811	160.2172676
TCONS_00495342	NONMMUT117023.1	0	0	0.059752115	0	0.169302956	0.104601598	0.27804521	0	0.075045355	0.129799347	0	0.040100281	0.210121662	0.114100353	0	0.156675908	0	0.017010246	0	0.033685991	0.01095685	0	0	0	0	0	0	0	0	0.062652887	0	0	0.112579405	0	0.0405171	0	0.216447546	0	0	0.100354299	0	0	0	0	0	0	0	0
TCONS_00681388	NONMMUT122507.1	0.064841377	0	0.013069855	0.057128892	0	0.06843898	0.013025504	0.269652408	0.810810827	0.298389609	0.48247847	0.200300197	0.312572862	0.699384845	0	0.211350506	0	0	0	0	0.028045818	0	0	0	0	0	0	0	0	0	0.128906763	0.210158917	0.017810559	0.038729977	0.016070791	0	0	0	0	0.023503406	0	0	0	0	0	0	0	0
TCONS_00681389	NONMMUT149630.1	0	0	0	0	0	0	0	0	0	0	0	0	0	0	0	0	0	0	0	0	0	0	1.075931316	0	0	0	0.577945629	0	0	0	0	2.922200951	0	0	0.038589739	0	0	0	0	0	1.12910681	0	0.199639942	0	0.704998547	0	0	0
TCONS_00098900	NONMMUT084795.1	682.9791626	691.7500039	317.1211593	254.2868855	202.7846163	286.7621231	175.3556325	59.65759134	81.06795094	56.44809298	78.25405752	56.52624481	49.45166022	36.67414844	47.78616059	42.49425132	17.40061804	17.92182817	30.38979685	12.52587916	32.71301144	18.45089279	53.65277835	56.71717536	23.151293	9.020205602	33.52084651	33.7258924	18.43098645	5.063051085	5.780965074	5.119868014	6.45811021	24.40996798	13.71827658	5.402701341	5.030429816	8.611610452	5.334329697	15.42899273	4.752554141	2.240633346	0.381894545	0	4.089965105	1.352108313	7.753777115	0
TCONS_00811693	NONMMUT001767.2	1.343072281	0	2.358534316	4.716595012	1.871584258	1.022343916	3.527551783	7.132255592	7.209023092	3.834929953	6.299748738	15.39335687	5.624907347	14.7481802	1.238053893	11.32171873	0	1.37827866	2.485816292	13.62606773	14.03396554	5.444428172	19.04793064	4.884719496	1.282650563	0.211627275	0.616090041	3.144341182	0.140901514	1.820214272	0.17937589	1.979792522	8.911382614	3.739944247	2.95290155	0.847935368	2.422077806	0.932625021	0.317940414	4.063117518	0.131695777	0.370613961	0.912678926	0	0.664218424	5.700718997	5.152792055	3.151596898
TCONS_00251000	NONMMUT014445.2	0.164572023	0	0.335151922	1.018375169	0.548312041	0.513394623	0.444670976	0.772531382	0.78265058	0.665108658	0.896974643	1.046913095	0.584848782	0.73323363	0.458012761	0.731770512	0	0.386685677	0.198439852	0.42753612	0.370070744	0.12385681	0	0.317001356	0.63905996	1.831389876	0	0.931825475	0.534757973	1.131373846	5.079236142	6.435933119	2.190892279	3.858320822	1.568220093	3.450407356	4.90067076	2.03769909	0.307740998	0.688241382	1.994947134	0.252978813	2.167475287	6.726713112	1.168777799	1.048331252	1.205482207	0
TCONS_00811694	NONMMUT094327.1	0	0	0	0	0	0	0	0	0	0	0	0	0	0	0	0	0	1.06231595	1.699812004	1.282580992	1.256905268	1.944190186	1.094686202	1.856664359	1.45096821	0.58604476	2.412537706	1.044584994	1.946043562	0.740931068	1.380763693	0.683016479	1.324821281	1.412172222	1.164197007	1.047346044	0.869108569	1.031039001	1.535961697	0.722217232	1.764573326	4.667712076	2.328401128	2.170867291	0.99722004	1.364932271	0.489054444	0.847251633
TCONS_00310226	NONMMUT054838.2	3.753339276	1.72869335	0.027102028	0	6.721292224	0	0	0	0	0	0	0	0	0	0	0	5.466471084	0.904183277	0.692438637	0.008292638	0	0	6.69888044	0	0.532188085	0	0.451375537	1.546244898	3.282537826	1.663847533	2.499310513	5.244236534	0.014133829	0	0	1.384968212	0.77321755	4.725326954	0.567193036	0	4.144602413	1.738470402	0.877702502	1.547006399	8.315413246	1.59314192	1.206969232	0
TCONS_00690770	NONMMUT044546.2	3.52403559	5.606581974	3.326822991	4.901682989	1.268854804	2.459289784	4.042531113	3.743071379	8.65993237	4.583097432	7.663423243	5.487380339	4.097942022	8.901342394	3.287300721	5.242598691	0	0	0	0	0	0	0	0	0	0	0	0	0	0	0	0	0	0.256968974	0	0	0	0	0.696971811	0	4.31444369	0	2.58739812	4.25222195	0	0.986658282	0	0
TCONS_00454113	NONMMUT049520.2	1.198797474	0	0.297493851	0.601520877	0	0.434851381	0.258244767	0	0.665875534	0.245028837	0	0.816733863	0	1.128693301	0	0.051435207	0	0.611492253	1.365045294	0.160684686	0.049183048	0.438244723	1.662281974	0.724791528	0.051427068	0	0.426716523	1.261407155	2.076127045	1.168825254	2.528053237	2.477817717	0.705433598	0.548924254	0.880648166	1.321102396	2.797226185	1.766681177	0.418422246	0	1.542704088	0.346327995	1.973836201	4.071460984	2.386556647	3.136582811	3.76380379	0.685352341
TCONS_00479115	NONMMUT074999.1	0.242688877	0	0	0	0	0	0	0	0	0	0	0	0	0	0	0	0	0	0.057983332	0.124202552	0.187905655	0.111180502	0.562125597	0	0.072627056	0	0.577945629	0.135761262	0	0	0.446915489	0	0	0.067802985	0	0.047839363	0.460365834	0.802397646	0.367671359	0.052362219	0.8754705	1.750613385	0.074273465	0	0.446958803	0.326016906	0.553208984	0
TCONS_00579763	NONMMUT146029.1	5.65030613	4.635454299	2.778939791	6.042105698	3.474282475	2.386296386	1.709571129	1.138307537	2.237256195	1.382541182	1.846432738	2.173020723	1.033254926	1.678283344	2.871383526	2.228068889	0	1.826253401	1.368550705	0.701836332	0.730014201	2.914036007	6.121386256	0.899530662	1.915265043	2.848828696	1.348539802	2.429127943	7.879800298	1.934199291	1.064545339	0.183705347	0.558208078	0.51900892	0.892850063	0.986653519	0.649992631	1.703735881	1.512327188	0.913788265	1.125604928	3.035745754	1.680239982	1.239787145	2.809826201	1.660342081	1.734863373	0.323798585
TCONS_00454666	NONMMUT059017.2	0.164572023	0	0.392783009	7.130961907	0.117110645	0.177267732	0.167800368	0.221337577	0.632268055	0.398809956	0.559525072	0.784701928	0.635849185	0.90542017	0.054177048	0.410849582	0	3.102606249	3.721425502	4.813351792	6.977276635	5.230476817	6.77259756	3.366918244	3.548912181	10.37787596	5.008862122	8.394016548	7.105442973	8.020214249	8.08086689	7.531919217	11.24779602	6.875038901	7.731949467	13.7308837	11.18671529	7.868162068	5.767945555	5.705304775	3.626949213	8.178552041	3.977710979	4.463233722	11.30377418	10.30775319	11.22484927	4.479427063
TCONS_00811854	NONMMUT001776.2	0	0	0.012922561	0.013460506	0.039388214	0.175631414	0	0	0.061913633	0	0	0.083439972	0	0.074192218	0	0.020352856	1.889974821	0.393197575	0.460481298	0.12396992	1.025590314	0	0	0	2.386092841	0	0	0	0.265909871	1.266217877	4.70398391	0	0.8362999	1.282445517	3.628625874	2.094452091	2.35642855	4.690725627	0	0.900963891	0	0	0	0	0	0	0	0
TCONS_00843579	NONMMUT154429.1	0	0	0	0	0	0	0	0	0	0	0	0	0	0	0	0	0	0	0	0.013916853	0	0.015458913	0	0	0	1.01743882	0	0	0	0.215094339	0.43549582	0.183705347	0.008134952	0	0.043351455	0	0	0.074158976	0.037702669	0	0.250134428	0	0	0	0	0	0.441434215	0.319959076
TCONS_00705141	NONMMUT059503.2	24.60686377	4.870703604	13.75519225	11.90857467	12.15955926	13.81039716	11.21136138	4.778867999	8.398416575	5.658475185	4.248641729	5.709471105	4.81822668	5.951587953	1.485101231	7.575734459	0	0	0	0.370039584	1.525537221	0.615512078	0	3.028311282	0	0	0	0	0	0	0	0	0.441661674	3.081985578	0.557035722	2.734336897	1.974267093	3.583730983	2.67305589	0	0	0	1.072987537	0	3.498166555	0	0	0
TCONS_00833222	NONMMUT031618.2	0	0	0	0	0	0	0	0	0	0	0	0	0	0	0	0	0	0	0	0	0	0	0	0	0	0	0	0	0	0	0	0	1.35244886	0	0	0	0.337927748	0	0	0	0	0	0	0	0.990675749	0	0	0
TCONS_00521435	NONMMUT120536.1	3.184194362	2.606449731	0.423164775	0	0.282080507	1.055997513	0.533940772	0.106305276	2.011925587	1.078568233	2.242632441	1.659181804	1.105927189	1.262120892	0.749864517	0.223359956	2.167046201	7.344784185	13.99794477	2.228995408	3.383941008	6.157315943	21.68755054	11.74101753	11.45760189	20.46049118	0	3.697972428	0	3.661268593	5.760593547	0	1.209674119	1.212183621	5.159035676	1.800029347	1.437270549	3.70345715	0.770055902	2.042301357	0	0	0.163806253	1.930472563	2.50110877	2.117198313	3.439667582	0
TCONS_00580846	NONMMUT118463.1	0.109714682	0	0	0.301043374	0	0	0	0.063239308	0.048636004	0	0.055952507	0	0	0.017411926	0	0	1.33850908	0.263377048	0.072028984	2.285274048	1.639107521	1.422219991	1.823391651	0.047661001	0.034193529	0.406975528	0	0.209924637	0.133555937	6.467165994	9.774461747	4.973454853	9.547635624	5.96374432	4.286933089	5.895041447	9.574562512	6.104113937	2.180564783	5.33797467	3.877083642	2.023830503	1.405915087	0.743872287	8.337804454	1.447927528	4.496482619	23.66801277
TCONS_00077447	NONMMUT111964.1	0	0	0	0	0	0	0	0	0	0	0	0	0	0	0	0	0	0.134620965	0.311717435	0.193107167	0.074574269	0.054508127	0.213206581	0.19737528	0	0	0	0	0	0.170512941	0	0	0.152658745	0.590861877	0.238851068	0	0.056275678	0.795056093	0	0.492252535	0	0	1.439588468	0	0	0.096540153	0.810747681	0.513534317
TCONS_00172143	NONMMUT087486.1	0	0	0.032551892	0	0	0	0	0	0	0	0	0	0	0	0	0	0	2.203546918	1.469391283	2.381300789	1.905940985	1.024152982	4.194972977	3.504879597	2.410011214	0	1.243931643	1.120337799	0.173756274	0.33061534	0.481997096	0	0.724323359	1.668120195	1.191364297	0.917987768	1.061985329	1.223127477	0.587310505	0.359678388	0.984654178	0.902881383	1.009001255	1.133537387	0.981968057	0.548480899	0.124025028	0
TCONS_00451186	NONMMUT021593.2	0.384001387	0	0.058917451	0.228756363	0.039036882	0.054543917	0.031462569	0	0	0	0.111905014	0.060361687	0	0.034823853	0	0.047405721	0	0	0	0	0.092917535	0	0	0	0	0	0	0	0	0	0	0	0	0	0	0	0	0	0	0	0	0	0	0	0	0	0	0
TCONS_00470072	NONMMUT020145.2	5.141614007	4.385967526	3.408099615	14.34963382	17.11704805	12.27559951	3.43636277	10.48631037	30.99728185	11.7892743	45.96543228	18.45451933	16.00093279	26.31130118	6.845107441	26.47705912	0	0.947241114	3.323225266	3.214081433	5.278560136	3.967839185	11.64248593	8.34383238	3.094001472	6.553323439	0	1.69921998	2.159198837	0.690964253	0.777069709	0.280518065	3.603359671	4.309679908	1.904346213	0.416154455	0.239744651	1.652035241	0	2.954516371	0	0	0.857848238	0.945709634	0	0.193233233	0	54.53158519
TCONS_00470073	NONMMUT057411.2	0.348234401	4.205847016	2.270010846	0.158203085	0	7.997992784	10.48963102	7.974160495	1.144988812	1.881691724	0	0	15.53003348	7.981313618	0	2.711386017	2.176415764	0.653590003	0	0.20819174	0.641755484	0.414499833	0	0	0	0	0	0	0	0.838513318	0	0	0	0.114181962	0.091138674	0.359141881	1.155481638	0.542469504	0.045299475	0	0.281776434	0	0.532121715	0	0.268369988	0.199131817	0.82813172	0
TCONS_00709356	NONMMUT123600.1	0	0	1.025880483	0	1.909332923	0.857662193	0	0	0	0	0	0	0	0	0	0	0	0	1.871817219	0	0	0	0	0	0.794059227	11.63319198	4.488325758	1.796655001	3.245676387	0	1.579446564	2.564710346	0.338088026	0	1.172728415	0	1.474456969	2.041075585	3.472197713	0	2.654926824	9.574489131	1.551650188	0	1.876534683	1.487469885	2.647401507	0
TCONS_00709357	NONMMUT123600.1	21.50281598	7.319878993	9.589708796	8.721384501	12.12852494	6.422996261	4.789987367	0	8.993429451	0	6.744739028	6.63791433	4.778989487	8.432421806	1.578719169	8.168985455	0	5.034897141	11.4932809	3.106746964	2.734201824	3.825029747	16.68416385	6.599270556	11.60468536	49.99572269	13.76936197	12.40297733	8.574157615	9.508049646	25.50016743	18.87039693	3.322149327	5.768860725	9.064450455	6.537086224	7.112356214	18.31432434	20.04688165	4.417305421	16.1933277	45.30344581	12.69387016	11.8145516	16.47857709	14.70040663	8.250549931	2.886350824
TCONS_00671426	NONMMUT020931.2	0.173568627	0	0.815761212	0.547666813	0.479490018	0.769873758	0.380718061	4.801096615	1.988628941	0.410402032	0.826474484	0.503778638	0.994653581	0.720000566	0.534889992	2.363870478	0	0	0.22129705	0.059800046	0.22242869	0.016819297	0	0.255949287	0	0	0	0.041145229	0	0	0	0.452282564	0.008953658	0.142353086	0.016269196	0.179384276	0.040915326	0	0.046917313	0.008764117	0	0	0	0	0	0.047494522	0	0
TCONS_00831149	NONMMUT150550.1	0	0	0	0	0	0.144486837	0	0	0.613786373	0	0.437212891	0.625306834	0	0	0	0	0	0.000104357	0	0	0	20.51626539	0	0	0	19.70697599	27.42506131	14.76654881	0	0	0	0	0	0	0	0	0	0	0	0	0	19.97874877	8.420539817	5.023369554	0	0	0	0
TCONS_00051422	NONMMUT134070.1	0	0	0	0.182956931	0.071320383	0	0.088252506	3.524547951	0	0.100234236	0	0.608405561	1.087434575	0	0	0.439561647	0	0	0	0	0	0	0	0	0	0	0	0	0	0	0	0	0	0	0	0	0	0	0	0	0	0	0	0	0	0	0	0
TCONS_00581185	NONMMUT115364.1	0	0	0	0	0	0	0	0	0	0	0	0	0	0	0.07395167	0	0	0.97748387	0.752198685	0.30917673	0.064725714	0.693780554	4.276895359	0.441226143	0.558876135	0	2.941550605	0	0.650417414	0.553332699	1.105530334	0	0.268535299	0.86611528	0	1.070119074	1.217983561	1.103587173	1.79847356	0.203942501	0	4.716789966	2.071050086	0.256635939	0	1.113477832	1.325931292	0
TCONS_00833221	NONMMUT023055.2	0	0	0	0	0	0	0	0	0	0	0	0	0	0	0	0	0	0	0	0	0	0	0	0	0	0	0	0	0	0	0	0	0	0	0	0	0	0	0	0	0	0	0	0	0	0	0	0
TCONS_00237461	NONMMUT059992.2	0	0	0.05454774	0	0	0	0	0	0	0	0	0	0.133687291	0.386248762	0	0	0	8.829183821	11.98173345	2.942153152	3.901594078	11.46732887	17.46926419	7.561402076	8.679309273	5.01617687	13.25171534	7.258504197	13.67586086	5.694908483	2.833190642	0	4.661818943	6.843515491	5.886274396	7.150384719	2.527239771	7.10699483	4.404459498	5.361017224	0	6.711780884	8.621825709	8.042747166	2.835462512	6.609122735	2.132713571	0
TCONS_00123249	NONMMUT139470.1	0	0	0	0	0	0	0	0	0	0	0	0	0	0	0	0	0	0.022238549	0.234838499	0.054403902	0.414183511	0.042403798	0	0.078076833	0	0	0	0.130633103	0	0	0	0	0.052851141	0.075945469	0	0	0.107625096	0.044823742	0	0	0	0	0	0	0	0	0.056506978	0
TCONS_00325446	NONMMUT094455.1	28.41955869	6.953181448	8.101169206	18.10942524	9.603111945	9.163378123	9.197557695	6.6401273	8.609010473	9.172628997	14.49203508	12.91277323	6.22602327	11.21347209	9.651045094	16.08749488	1.33850908	2.504649143	2.304927503	2.039268244	2.668022718	1.05120608	6.90283982	1.680233471	1.333547631	1.01743882	0.385297086	2.24919254	3.606010306	4.039613145	9.242189078	6.613392484	5.773315425	3.708778187	1.61558216	4.799936039	1.506032927	3.531379826	1.090282391	2.367821144	2.751478713	1.264894064	2.503214668	0.371936143	8.869947201	0.480625339	3.71756437	7.998976899
TCONS_00325442	NONMMUT038240.2	0	0	0	0	0	0	0	0	0	0	0	0	0	0	0	0	0	0	0	0	0	0	0	0	0	5.774779254	0	4.379657703	0	3.225959976	22.24246514	0	0	0	6.809650459	7.134651595	10.73842563	2.147915313	5.551260722	0	28.85888449	29.69338816	6.449652609	20.94533596	17.14019943	10.32619172	6.129803377	0
TCONS_00080217	NONMMUT149213.1	8.502887866	3.311038785	5.145123556	12.06657308	7.495081294	5.399861458	3.03112488	1.281797526	4.085424356	1.568652495	2.40595781	1.57099338	1.194548669	1.829836751	1.246072096	1.738304583	4.015527241	4.253302428	7.333583034	3.961030081	5.19715028	4.686106657	6.251628517	10.1031077	6.011598527	1.01743882	0.577945629	2.279271741	4.808147297	2.503915796	8.524443577	3.124460538	5.206094148	13.82920539	5.115074835	2.376741662	3.352593573	2.802025984	7.350613543	8.320682415	3.376814785	4.300639819	2.889052633	4.145972191	7.467197502	3.629092704	3.85727398	1.59979538
TCONS_00245332	NONMMUT143322.1	0	2.901628839	0	0	0	0	0	0	0	0	0	0	0	0	0	0	0	0	0	0	0	0	0	0	0	0	0	0	0	0	0	0	0	0	0	0	0	0	0	0	0	0	0	0	0	0	0	0
TCONS_00245330	NONMMUT143321.1	0	0	0	0	0	0	0	0	0	0	0	0	0	0	0	0	0	0	0	0	0.024548387	0	0	0	0	0	0	0	0.801335623	0	0	0	0.012660159	0	0	0	0	0	0	0.011839106	4.19187782	2.907738475	1.632541741	3.200882451	0	0	0	0
TCONS_00214286	NONMMUT093367.1	1.073503307	0.165551939	0.280447069	0.28428396	0.781088967	0.285346504	0.329496998	0.597516598	1.293620441	0.475248531	0.992821288	1.200412864	0.869364798	1.307426725	0.095947551	0.456106244	0	10.25490333	13.57326188	3.362482249	4.677234166	11.15886172	16.55392159	14.20307371	19.57887277	2.131534328	3.26231043	15.91180766	9.280534967	3.25611073	1.037980094	2.480389592	1.355210129	1.909067959	1.599936522	3.286009546	0.85699818	1.14680011	0.831709613	2.40948844	0.497642445	3.307192021	4.506095017	1.677555986	1.174348558	5.003419016	2.399139018	0.603762776
TCONS_00251900	NONMMUT143321.1	0	0	0	0	0	0	0	0	0	0	0	0	0	0	0	0	0	0	0.289076324	0	0	0	0	0.03798107	0	0	0	0	0	0.07444771	0.396010866	0.393313147	0	0	0	0.682524238	0.524988785	0.743820109	0.245243197	0	0.506147016	1.277543005	0.116210884	0.338585869	0.937347896	0.365100485	0	0
TCONS_00174466	NONMMUT011099.2	0	0	0	0	0	0	0	0	0	0	0	0	0	0.097123725	0	0	17.30692241	0.042890866	0	0	0.011029851	0.086291652	5.641313283	0.028813431	1.299678941	0	6.685097096	0.662522155	2.938497731	2.273765043	0	0	0	0.091915629	0.046426729	0	0	0.067560872	0.098371608	0	0	3.05800789	0.905443607	1.840835953	0	1.935128696	0	0
TCONS_00174464	NONMMUT136346.1	0	0	0	0	0	0	0	0	0	0	0	0	0	0	0	0	0	20.49644891	19.09937359	4.084147018	4.645505094	17.6546351	17.59638064	9.809475186	18.84058319	7.486314837	13.98647688	13.95258102	13.46323981	10.42042283	11.0354157	10.72435073	4.858464485	3.163078594	11.44020654	8.347462101	7.296269919	11.54727128	23.68110939	4.507449485	13.67935163	12.72483429	9.710415474	16.238856	11.06845015	12.11095023	10.6486976	1.079221963
TCONS_00813171	NONMMUT149857.1	2.536493736	9.027878351	3.854222557	1.456925197	8.238031228	4.308887659	2.053792609	0	0	0	0	0.073882705	0.069916917	0	0	0.041037553	0	0	0	0.027181425	0	0.086291652	1.913389053	0.203427471	0.262931141	0.530696089	0.928758627	0.695120452	0	0.126614203	0	0.493248856	0.112973872	0.093727906	0.186528881	0.362715167	0	0	0	0.159160488	0	2.156391401	0.336288031	0.147162734	0.126829428	0.093896714	0.057816977	0
TCONS_00753686	NONMMUT133026.1	0	0	0.038404359	0.045691074	0.103486773	0	0.084078472	0.031619654	0.048636004	0.113581076	0.167857522	0.382290683	0.032931689	0.217544608	0.059323867	0.072989009	0	1.416870003	1.589247513	1.884267071	1.32704636	2.293530701	5.400234858	0.526903956	1.576526848	1.685285661	5.542691235	0.931435615	1.392454202	1.686033937	1.594979248	1.297510864	3.094028292	3.675816866	1.598774436	1.892028121	2.020792881	3.059568895	0.916575787	1.627757851	1.037932811	0.91628926	2.726652295	1.688590091	0.85654484	2.879557488	1.836689231	0.333077398
TCONS_00219392	NONMMUT090261.1	0.867568849	0.331103878	0.370895176	0.337837029	0	0.14675041	0.14475928	0.127490444	0	0.186111313	0.329280505	0.113479971	0.039104725	0.06010597	0.144165124	0.068880513	0	0.020871467	0	0.03864424	0.048479579	0.015458913	0	0.046654289	0.034193529	0	0	0	0	0	0.629049518	0	0.240974706	0.226994082	0.600358834	0.479566943	0.205260831	0.431354948	0.351703997	0.332527902	0	0	0.102871836	0.247957429	0.432680351	0.24031267	0.21243225	0
TCONS_00129255	NONMMUT010053.2	26.02991805	9.851002592	26.84349787	6.718044631	0	33.66829662	3.937613933	12.8109557	18.74013334	15.82648066	27.45595123	16.78125313	11.72694003	12.65657255	12.65337454	2.539587684	0	3.522540174	11.15834612	0.143761866	0.037615641	2.383439738	0	0	0	25.0816983	0	0	0	10.75985584	18.75322424	37.26720147	0.541953059	4.698894056	6.608042812	15.96245396	15.65171994	12.07388055	4.341891357	0	5.633777733	0	23.07418703	0	3.952264584	16.54983109	16.8886825	0
TCONS_00129254	NONMMUT021886.2	24.48924963	25.42298355	16.46413811	26.30365876	35.02424163	15.42260627	18.3611463	6.951422792	8.031944283	7.388300078	9.198927898	21.83167522	6.772297201	18.42862613	6.650232601	28.72173581	28.22514098	17.89033313	21.8136178	36.01328469	35.04120591	19.91420257	55.66437007	23.03898612	24.44500517	9.720610486	25.00944122	41.75898852	14.92153709	20.95137946	57.92863787	11.78524911	26.56274819	28.469392	26.74437541	23.4613407	19.56936237	31.20001955	29.00172264	26.7473526	24.28280018	61.3225702	20.44001651	14.14398766	30.70645917	15.36303605	17.22110357	34.1076375
TCONS_00129253	NONMMUT010052.2	0.596025011	1.515628004	0.777955848	3.30212218	0.117774272	0.287760072	0.508938517	1.641565947	0.677694083	0.306099935	0.429771208	0.768746322	0.817569583	0.766960531	0	0.201584928	0	0	0	0.01821826	0.057339297	0	0	0.010722385	0	8.350934347	36.36221987	0	36.04380923	0	0	60.96996754	0.03098427	0	0.028088455	0	0	0	0	0.014365841	0	16.47119753	0	16.88280145	0	0	0	67.67774375
TCONS_00531760	NONMMUT064966.2	0	0	0	0	0	0	0	0	0	0	0	0	0	0	0	0	0	0.137720378	0	0	0	0	0.569288922	0.018204227	0	0.775695356	0.286853681	0.282528572	1.045609433	0.109566701	0	0	0	0.137171505	0	0.343435424	0.303991291	0.121275018	0.814616798	0	1.692784745	0	1.112936099	2.716621592	0	0.988558937	0	0
TCONS_00828629	NONMMUT048727.2	0	0	0.082504071	0.06918074	0	0.161709079	0	0	0	0	0	0	0	0	0	0	0	0	0.247707678	0.038885995	0.054837339	0	0	0.044825526	0	0	0	0.432864602	0	0.269365695	1.230566023	0	0.157265823	0	0.076187453	0.342928764	0.10136464	0	0	0	0.718135944	0	0	0	0.892403224	0.041639632	0.536639268	0
TCONS_00099773	NONMMUT022630.2	0	0	1.135712432	0	7.75264664	0	16.65831865	7.868708949	0	0	0	0	30.16704328	17.31570803	0	6.46348563	0	0	0	0.290908295	0	0	0	0	0	0	0	0	0	0	0	0	0	0	0	0	0	0	0	0	0	0	0	0	0	0	0	0
TCONS_00035981	NONMMUT139470.1	0	0	0	0.030544994	0	0	0	0	0.133603104	0	0	0.14386202	0	0	0	0	97.5840045	60.40744292	85.9957647	90.90308117	82.65974022	93.00544247	107.8065987	80.7334473	54.97898883	31.5226965	20.93376864	45.5972206	25.05015226	92.90165889	51.69993471	51.26389554	77.35480083	176.1639902	123.9078957	47.70501765	68.18884541	63.4736715	75.23110285	143.7208239	28.0924726	21.01191424	56.94751646	23.00288671	52.10493636	103.5656943	64.52009992	46.84808794
TCONS_00035980	NONMMUT136346.1	0	0	0	0	0	0	0	0	0	0	0	0	0	0	0	0	0	55.41559318	61.15335211	15.71137882	13.80971845	23.85322634	107.7602324	29.96300198	11.61278922	43.9486768	36.36568755	30.89241962	29.53242307	19.49477569	23.35535052	0	5.571579026	0	9.166742314	21.94610756	13.00402627	10.38340284	0	0	0	0	11.95514751	0	32.71279796	28.98422032	3.769610272	0
TCONS_00035983	NONMMUT076422.1	0	0	0	0.229647309	0	0	0	0	0	0	0	0	0	0	0	0	17.84768008	0	0	0	0	0	0	0	0	0	0	0	31.25996912	0	0	0	0	0	1.628180866	0	14.33336383	0	12.18299129	0	0	0	8.420368364	0	0	5.723920093	0	0
TCONS_00828623	NONMMUT135292.1	0	0	0	0	0	0	0	0	6.129741522	3.167508198	3.615427205	1.400511856	0	3.321133418	3.5354316	2.628078363	0	0	0	0	0	0	0	0	0	0	0	0	0	0	0	0	0	0	0	0	0	0	0	0	0	0	0	0	0	0	0	0
TCONS_00238563	NONMMUT092777.1	0	2.146049788	0	0	1.788318589	0.36027621	0	0	0	0	0	0	0	0	0	0	0	0.386925699	0.125426472	0	0	0.224989019	1.169966228	0	0	0	2.334322397	1.25456961	0.446477498	0.779008246	3.745457609	1.264076491	0	0	0.459959075	0.813482493	0.39266397	2.412644892	0.866774501	0	3.283139441	5.948543806	1.874324846	1.504109764	1.825586572	1.056589269	1.753309573	0
TCONS_00238561	NONMMUT092777.1	129.1313283	43.38272013	34.882028	111.8672193	62.21721634	43.96628368	42.63888116	51.81209121	118.9936748	88.21705482	185.5787437	113.9180561	70.585724	144.4670314	40.32175532	95.8000094	18.74046563	8.867326427	17.83341617	27.60870977	34.04511481	16.28475899	31.62933303	21.12072166	18.45833373	3.854465226	0.820297497	21.61108162	9.868448203	19.17047494	23.5820019	6.964269696	52.00547048	42.23247906	30.56766477	15.309076	27.88078393	25.04234636	14.62300812	44.60394204	2.328876597	12.74304876	11.9073464	7.679117597	22.02672907	14.4196122	21.44163669	14.62884891
TCONS_00380661	NONMMUT025771.2	0.204288738	1.007549102	0	0.108406436	0	0.02672652	0	0.036647179	0	0	0.13702769	0.029657709	0.030626736	0.0367914	0	0.075533116	0	1.721729092	1.309102783	0.557399378	1.567008664	1.430985194	1.702657075	0.752550591	0.888296593	0.623689997	1.222547655	1.558210602	2.65682826	0.321380486	0.334654344	0.752273395	0.694902072	0.824773241	0.702551491	2.034292892	0.189900479	0.980887212	1.016002507	0.330605041	2.138399229	0.801942837	0.128144017	0.174190094	2.527610442	1.289561479	0.536497647	0
TCONS_00380660	NONMMUT084601.1	0	0	0.335299216	0.21828173	0	0.123214709	0.215329823	0.271423108	0.192063581	0.246836776	0	0.455931941	0.252511608	0.19478722	0.203488991	0.304613362	0	2.252260923	3.357030869	2.12623603	2.292304318	2.430481211	4.54832023	3.654689187	2.45653151	1.741651772	2.135123804	2.629755918	2.836861663	1.394462875	1.045093192	0.911913341	2.46828448	2.529904728	2.012009175	2.399861354	2.586047	2.31965189	2.643723777	1.556413334	5.901171437	14.0094607	5.436639352	4.007611946	2.030893399	3.133655366	1.254978921	0
TCONS_00242966	NONMMUT058930.2	0	0	1.230461514	1.65104303	0	0.769846486	2.221844678	0.626258863	0	0	0	3.551017669	0	3.593525593	1.589121162	2.452677196	0	0	0	9.964827004	14.99022442	4.290482157	0	24.65131711	0	0	0	0	0	0	0	0	1.460674242	3.239398431	0	0	0	0	0.035733126	1.905817921	0	0	0	0	0	0	0	0
TCONS_00242964	NONMMUT011099.2	0	0	0	0	0	0	0	0	0	0	0	0	0	0	0	0	0	1.99762902	2.033882434	3.210774413	7.983647666	1.346811413	0	0.977244126	1.071505522	0	2.284426425	0.320404975	0	1.038551243	2.824867833	0.9826399	8.806513923	5.652977094	4.258844634	2.971987064	3.892361138	3.31302284	0.064572854	0.931872697	0.338807083	0	2.920599996	1.339218074	0.211526607	0.134749868	0	2.261470749
TCONS_00549957	NONMMUT149857.1	0.86630713	1.73382546	0.168906514	0	0.858889472	0	0.111251644	0	0	0	0	0	0	0	0	0	0	0	0	0	0	0.030500435	0	0	0.039237075	0	0	0	0	0	0	0.263433467	0	0	0.069696781	0	0	0	0	0	0	0	0	0	0	0.046402192	0	0
TCONS_00272866	NONMMUT023055.2	0	0	0	0	0	0	0	0	0	0	0	0	0.064856617	0.052096484	0	0	0	0.017959898	0	0	0	0	0	0	0.076593505	0	0	0	0	0.07528207	0.708938807	1.088637885	0	0.141034293	0	0.654311281	0.38031411	0.435629776	0	0	0	0	0.601594495	0	0	0.110849681	0	0
TCONS_00078304	NONMMUT038240.2	0	0	0.280722017	0	0	0	0	0	0	0	0	0	0.072698757	0.046594315	0	0	22.06398368	7.946320748	7.526404625	14.89803889	19.36968579	15.01825663	5.536989232	20.91769926	11.59348698	1.833017778	2.368035892	7.550359421	16.23265572	5.262197761	4.145968599	4.130614722	17.31574111	22.60766271	15.55265675	11.33931557	13.2923151	6.164023486	10.11103271	5.845482965	0	4.774469135	2.022563161	1.674952433	3.865349918	11.80747902	4.053490568	4.679081527
TCONS_00078307	NONMMUT059992.2	0	0	0	0.461895216	0	0	0.201056304	0.062765013	0	0.343375372	0	0.125310862	0	0	0	0.080984773	0	33.32675566	33.84956507	7.889491715	9.095187197	21.76972043	47.27260072	14.91726199	25.11866898	71.81856445	49.6349339	41.11451989	66.49028913	22.82044175	28.42321538	23.34729623	9.796983451	15.6126817	21.74465881	23.34406227	27.32736652	24.82993696	27.91615308	9.798584203	36.93735106	57.32778176	35.29443526	21.25081951	30.44987972	29.05482855	15.17693884	0
TCONS_00061709	NONMMUT005584.2	173.3666424	74.25269358	151.866261	172.7170861	114.4552394	112.9900566	120.8051695	108.2021708	67.16014507	52.57602052	55.99575849	39.9071634	50.24249765	75.4042449	19.46754689	53.08348845	5.407576684	4.941852139	5.806016341	10.83451855	15.21166427	7.895067805	6.641573845	3.873253091	7.267441363	8.793520233	18.50851613	10.261836	10.28380717	8.218678266	11.09904648	22.25590276	8.588678802	5.261133867	10.29963387	17.29184958	16.41508497	6.708382588	5.011395086	4.78516789	11.66114199	10.47433477	10.56068549	16.48916903	17.68883812	7.799609854	12.63982508	7.039099671
TCONS_00078308	NONMMUT059992.2	0	0	0	0	0	0	0	0	0.284569261	0	0	0	0	0.645790936	0	0	0	1.297349545	9.162591027	31.63398271	30.3010047	0	0	36.00436897	8.37881654	0	0	0	0	0	4.22822892	8.887848382	19.1492388	24.61860106	12.98640369	0	11.0055384	7.782572572	7.250342733	6.490444073	0	4.22373426	0	0	5.639609783	8.841671129	5.029227296	8.572023604
TCONS_00078309	NONMMUT059992.2	0	0	0	0	0	0	0	0	0	0	0	3.664054988	0	0	0	0	0	1.140156088	12.93441281	34.21365909	39.55040408	31.6104161	0	70.38741802	9.618041321	0	0	0	0	0	0	4.677138129	13.02617253	21.35258853	2.188461925	5.124785044	2.360670607	0	1.368691276	7.682069928	0	5.640668591	10.03885095	0	3.351650171	3.425722646	0.816093893	0
TCONS_00311347	NONMMUT145207.1	3.527711032	0.344348034	2.476192467	7.862693313	3.482948663	3.373159484	3.777658232	4.922674184	1.782315011	4.034175408	1.590002397	0.819369656	4.312620604	1.66207284	2.594972229	3.189836158	0	0	0.024874009	0.004561407	0.069981816	0.634124609	0	0.138241327	1.259638318	0	0	0	0.133555937	0.299156157	0.241942122	1.56020951	0.357007558	0.125693751	0.014171773	0	0	0.371724192	0	0.101140924	0	0	0.072078866	0	0	0	0	0
TCONS_00311349	NONMMUT102593.1	8.266617298	4.456658204	4.146963734	13.84115658	7.174120053	7.085636678	8.195779008	6.268975804	3.860531472	5.62008308	2.597259432	2.24843259	5.941348291	4.571762439	4.122981681	5.889607773	0	0	0.11918396	0.004561407	0.248569835	0.092444299	0	0.463403609	0.911650773	0	0	0	0	0.13698682	0.241942122	0.827959998	0.030016709	0.299723397	0	0	0	0.030977016	0	0.049827538	0.125067214	0	0.133664805	0	0.108170088	0	0	0
TCONS_00433310	NONMMUT020145.2	0.599316451	0.711376683	1.275062024	0.212743418	1.647551594	2.429304265	0.194176489	0.143648087	0.588252471	0.184064089	0.678312245	0.295490577	0.520998926	0.649586736	0.211182132	0.026057345	2.031856784	2.194520008	2.907113823	0.728652844	0.930595557	2.722561912	2.587522995	2.204581925	4.671622513	27.87375391	7.752562674	5.378419148	9.105843801	1.841452539	7.496625053	1.905759267	0.815653644	0.859887173	1.597484805	2.44420743	0.947039264	3.947060404	0.793901433	1.232705168	7.929261383	9.354650542	2.33971703	4.762518338	2.118132575	2.171749289	1.352308296	0
TCONS_00479291	NONMMUT056424.2	0.485158324	0.512714356	2.030953287	5.655435206	1.364026722	1.768641066	3.162900607	4.165573193	2.861207493	2.367096615	1.541491573	5.251486867	2.186393916	6.148673547	1.687452504	3.577346324	0	0	2.52072634	11.0909791	20.52493326	16.22249049	6.708518367	31.27695282	6.331359314	0	0	0	0	0	0	0	5.839876157	6.540550415	0.29161258	0	0	0	0	1.460890026	0	0	0	0	0	0	0	0
TCONS_00632605	NONMMUT062587.2	0	0	0	0	0	0	0	0	0	0	0	0	0	0	0	0	2.209878491	0.120574467	0.039399855	0.052811971	0.041789995	0.994564623	0	0	0	0	0	1.230968082	0	0.125741917	0	0	0	0	0.938752437	0	1.113163697	0.357103041	1.473569408	0.063661017	0	0	0.220077147	0	0	0	0	0
TCONS_00832936	NONMMUT139470.1	0	0	0	0	0	0.049566785	0.061079334	0.281130342	0.127961327	0	0.191861147	0	0	0.13992224	0.158522041	0.059999841	0	0	0	0	0	0	0	0	0	0	0	0	0	0	0	0	0	0	0	0	0	0	0	0	0	0	0	0	0	0	0	0
TCONS_00621519	NONMMUT056620.2	0	0	0	0	0	0	0	0	0	0	0	0	0	0	0	0	1.33850908	0	0.195126519	0	0	0	0	0	0	4.273243044	3.467673777	0	8.433656769	0.160083435	0.193553698	0	0	0	0	0	0	0	0.617099834	0	0.625336071	0.252978813	1.006703784	3.221586896	0	0	0	0
TCONS_00475903	NONMMUT147405.1	0.434909	0	0.109753392	0	0.332633269	1.044570562	0.032752534	0	0	0	0	0	0	0.022879271	0	0	0	0.065379872	0.202905649	0.006431584	0	0.189634485	0	0.020193825	0.047050296	0.203487764	0	0	0.400667812	0.048032616	0.058791936	0	0.0513477	0	0	0	0.067496603	0.433678224	0.069391199	0.078686352	0.125067214	0	0.068581224	0.602536552	0	0	0.054524277	0
TCONS_00316959	NONMMUT029098.2	0	1.072611014	0	0	1.33412447	0.096706366	0	0	0	0	0	0	0	0	0	0	0	0.276807837	0.288308015	0	0	0.32680142	0	0.115515828	0.236687608	0.970229659	2.273060161	0.610370877	0.786778026	0.799639705	1.998248378	2.926058763	0	0	0.487083849	2.185437545	1.978064418	1.578433851	1.161045236	0	2.294858314	1.562144169	0.765606492	1.355087349	2.158912698	1.112385501	1.947047785	0
TCONS_00032845	NONMMUT152274.1	0	0	0	0	0	0	0	0	0	0	0	0	0	0	0	0	0	0.696835683	0	0	0	0.636938131	3.570591579	0	0.199040532	0	0.778492763	0	0	0	0.759746653	0	0	0	1.00949793	2.354181963	2.372712576	0	1.265853027	0	5.217679111	2.866502929	4.725040574	6.88416608	1.599024323	1.805556474	1.798522237	0
TCONS_00433341	NONMMUT041753.2	2.792622662	0.496655818	1.358361481	2.975819288	2.433051728	1.680498095	2.731003434	2.817817069	1.341380997	2.470016171	3.580456888	2.301289307	1.942201336	3.203846682	1.925181389	2.044197899	0	0	0.024009661	0.057793027	0.092910898	0	0	0.55068978	0.102580587	0	0	0.059978468	0	0	1.010592245	1.653348121	0.177286886	0.475582338	0.04251532	0	0	0	0.070340799	0.087402794	0	0	0	0	0.054085044	0	0	0
TCONS_00433346	NONMMUT041688.2	17.92661106	19.20899151	11.98790438	20.84195612	14.94027345	14.87757618	10.94627875	12.37722891	31.77891107	20.63089103	24.88689187	23.24552701	23.99512018	24.67022713	23.91976249	18.0084221	112.7198652	81.52252212	109.4754609	135.1292385	127.8005731	103.4605681	204.4294247	53.25291573	60.69171882	72.34295242	79.73973644	92.12581683	114.0396752	125.8233427	244.4351909	132.3606209	210.6716584	217.6877838	154.3901613	181.2493448	176.154161	208.0556721	143.0351317	130.4325163	225.8820196	202.3873509	145.7317743	124.534635	144.9987035	110.6411547	109.7923156	263.6961922
TCONS_00433349	NONMMUT041688.2	0	0	0	0	0	0	0	0.139822109	0	0	0	0	0	0.146173122	0	0	0	0	3.281472465	11.65928937	6.80804607	0	0.269861964	1.825938769	0	0	0	0	0	5.472248012	5.680510705	16.9350611	6.937142054	1.751272231	8.629858854	7.248650076	0	0	0	0.664753868	0	6.744415151	0	0	0	0	0	0
TCONS_00831829	NONMMUT038240.2	0	0	0	0	0	0	0	0	0	0	0	0	0	0	0	0	0	0	0	0	0	0	0	0	0	0	0	0	0	0	2.645153225	0	0	0	0	0	0	0	1.173812091	0	0	0	0	2.989126806	2.015641416	1.021700238	1.625885629	0
TCONS_00257297	NONMMUT131167.1	1.678031206	5.148003103	1.349582781	2.263640531	1.198159011	1.149622147	1.663079939	1.806810258	1.446775218	1.594176332	2.057933215	1.30940595	1.346940524	1.669385849	2.448044076	1.109862741	0	0	0	0.164210653	0	0	0	0.134577846	0	0	0	0	0	0	0	0	0	0	0	0	0	0	0	0	0	0	0	0	0	0	0	0
TCONS_00257294	NONMMUT131167.1	3.95131942	7.618038036	2.297269987	6.870119454	2.572803765	1.884724158	3.608903499	3.943287027	11.41905289	5.2288771	7.659954188	7.333019394	5.520681068	3.572648694	3.81894009	3.952025341	0	0	0	0	0.152148232	0	0	0.141857154	0	0	0	0	0	0.360292025	0	0	0	0.755838647	0	0	0	0	0	0	0	0	0	0	0	0	0	0
TCONS_00811262	NONMMUT035368.2	0.072356833	0	0.348486905	0.249500953	0.054807782	0.066666303	0.257028214	0.476413324	0.915037784	0.470223526	0.338568621	0.315651381	0.585007744	0.766699352	0.073734962	0.769268437	0	0.192059243	0.163697872	0.652760154	0.669754847	0.531585639	0	0.213965193	0.584538378	0	0	0.699378923	0.137429059	0.102379823	0.240054974	0	1.162367845	0.315565932	1.607490077	0.347915364	0.830759003	0.159376747	0	0.173494546	0.283402307	0.689620244	0.164389193	0	0.075773147	0.318436134	0.063021567	0
TCONS_00811263	NONMMUT001773.2	24.0392	8.495794418	55.16016769	46.6438077	28.90056503	29.24741666	58.00496917	43.45498509	29.63810008	37.58478085	11.03198799	75.59578937	27.11295367	34.48533	26.55883484	63.55700823	3.494847209	6.362562492	15.27127316	9.760827197	11.60725897	12.8780938	1.731701099	12.64565324	8.44063844	4.306615037	0	6.314713018	4.461436084	6.164027662	3.412787191	0.302746411	13.5344768	8.986111939	11.20896571	12.27636975	7.319601233	6.098104396	5.815355254	14.37059257	3.382317742	0	5.190055562	5.543832197	8.086309	4.082103933	5.312576512	26.20752795
TCONS_00257298	NONMMUT131167.1	16.54980151	18.03671823	5.442234444	8.120381336	7.305713381	4.999509105	4.945664159	6.300532219	8.728995496	4.735708708	12.28381343	7.817401809	6.897294553	5.010264392	9.11583004	5.934595803	0	0	0	0	0.63095791	0	0	1.05486228	0.983593958	0	0	0	0	0	0	0	0	0.820791337	0	0	0	0	0	0	0	0	0	0	0	0.524362245	0	0
TCONS_00811267	NONMMUT106536.1	0	0	0	0	0	0	0	0	0	0	0	0	0	0	0	0	1.521884824	0	0	0	0	0	0	0	0	0	0.530939385	0.324783403	0	0	1.225872346	0	0.31811162	0	0	2.467247123	1.064824771	0.486122312	0	0	0	1.105264433	1.062014541	0	0	0.293443616	0.492984441	0
TCONS_00811264	NONMMUT001771.2	0.118491857	0	0.183910825	0	0	0.085102147	0.119274599	0.543067554	0.159185642	0	0.547551235	0.957115026	0.472250488	0.507662124	0	0.160784404	14.73029243	7.603350359	12.49285112	12.0985255	18.253952	15.82926212	27.66150255	8.97741811	11.50639606	5.284577231	13.64587426	27.99156103	4.665108888	9.902512525	17.6820013	4.365757566	16.20086561	10.63069806	10.32745307	14.96470726	18.86333353	7.331516242	6.845883136	14.60093071	5.746463293	3.254572428	9.15034691	2.975489148	9.427672174	10.37958483	10.83606284	0.530812107
TCONS_00811265	NONMMUT035367.2	0.397825437	0	0.302266165	0.031399821	0.381507445	0.185244779	0.219325569	0.037279572	0.54798186	0.333192425	0.063282286	0.209857464	0.214943518	0.234730179	0	0.018630448	0	0.796559555	0.855608297	0.554557622	0.934139444	1.016408067	4.374186328	0.405157231	0.090988981	0.670085207	0.986553189	0.707506005	1.14136904	0.447805061	0.907331348	0	0.679376445	0.072993074	0.254765969	2.595005421	0.141493133	0.620469631	0.552878684	0.213858745	0.918868823	0	0.578276879	0.93455155	0.173721161	1.608041306	0.968549437	0
TCONS_00241146	NONMMUT136346.1	0	0	0	0	0	0	0	0	0	0.07689056	0	0	0	0	0	0	0	0.487588787	0	0	0.120226702	0	0	0.370625194	1.319528284	0	15.93819927	0.23721484	0	0.517151795	0	0	0	0.216511803	0	0	1.343158458	0	0.988604766	0	0	0	1.445315	0.755774244	0.839886647	0.560474686	0	0
TCONS_00241141	NONMMUT059992.2	1.957584216	1.608668194	5.697111339	9.257505137	1.001217943	4.844740739	7.571477737	8.568831324	14.78836072	9.406597505	2.341500521	13.95922356	7.015297564	9.600988418	6.946093458	7.103447063	26.85316917	23.12072287	45.44553528	19.39257114	25.41849718	44.39622019	64.70578781	52.4126322	34.09554744	0	0	23.03329105	0	4.613065309	0	10.09920144	21.95064698	25.41125531	15.33703322	19.38038175	6.575872822	6.817762432	9.422888665	15.78511939	46.28024716	81.51027947	58.05849799	52.74153697	9.530650097	23.35419694	11.96471539	0
TCONS_00126516	NONMMUT139616.1	0	0	0.025579993	0.230887409	0	0.083438558	0	0.072914922	0	0.184409724	0	0.097121954	0	0	0	0	0	0.601651356	0.34609927	1.491748873	0.70471589	1.15544553	0.797994332	0.208407423	0.577494511	0	0	0.803771446	0.822838129	0.300274959	0.23555485	0	0.56076095	0.389792716	0.3306133	0.376261653	3.558743867	0	0.044138852	0.767491879	0	0	0.302168872	0.146914777	0	0.450870262	0.342582408	0
TCONS_00379298	NONMMUT042427.2	0	0	0	0.014917323	0	0	0.017818302	0.083444266	0.094013396	0	0	0.023460576	0	0.107396762	0.203651522	0.044719397	0	0	0	0	0	0	0	0.008470684	0	0	0	0	0	0	0	0	0	0	0.01574484	0	0	0	0	0	0	0	0	0	0	0	0	0
TCONS_00379299	NONMMUT135292.1	0	2.209290629	0.171017722	0	0	0	0.686366432	1.262319819	0	0.853745767	0	0.373135827	0.551360725	0	0	0	0	0	0	0	0	0	0	0	0	0	0	0	0	0	0	0	0	0	0	0	0	0	0	0	0	0	0	0	0	0	0	0
TCONS_00379290	NONMMUT042427.2	0.834764159	0.471657475	0.552920642	0.668883606	0.397122198	0.525735184	0.727750198	0.730002948	0.856480035	0.544322416	1.599961943	0.934801322	0.602785027	1.110079952	0.346678928	0.535163185	0	0.011896736	0.182473427	0.021712297	0.007565602	0.038740036	0	0.071083456	0	0.228923734	0	0	0	0	0	0.197299542	0.019172587	0.030936335	0.017317907	0.068399089	0	0.033331269	0.039320507	0.009860624	0	0	0.04481783	0	0	0.026740246	0	0
TCONS_00530295	NONMMUT047348.2	0.174007486	0	0.252638032	0.464363377	0.588402918	0.209080471	0.15610678	0	0.631878967	0.513826748	0.471679636	1.06822077	0.527913786	0.527285365	0.20478924	0.377760389	0	0.256802535	0	0.054974078	0.04236737	0	1.17465495	0	0.047631586	0	0	0	0	0.568521852	0	1.127216008	1.786064895	1.368277681	1.679610231	0	0.078614898	0.055324951	0.577533134	0	0	0	0.107706812	0	0.280863633	0.112488176	0.539117644	0.481538409
TCONS_00530296	NONMMUT047348.2	0	0	0	0	0	0	0	0	0	0	0	0	0	0	0	0	0	0.2301288	0	0.208511038	0.395541603	0.160432599	0	0.081752229	0.223745357	0	0.764429419	0.509517083	0	0	1.434232902	0	0	0	0	0.120718391	0.717489235	0.466575815	0.976963364	0.453795306	0	0	0	0	0.450312076	0	0	20.13758432
TCONS_00077451	NONMMUT139470.1	0	0	0	0.02140678	0	0	0	0	0	0	0	0.032635552	0	0	0	0	0	0.083798942	0.031836811	0.020758963	0.101558248	0.155253863	0	0.042931238	0.061377385	0	0	0.487684921	0.176828061	0	0	0	0.04638337	0.044575209	0.025112382	0.149438009	0.047859984	0.097670531	0	0.220215312	0	0.367072257	0	0.562491428	0.076205827	0.028160276	0	0
TCONS_00077453	NONMMUT139470.1	0	0	0	0	0	0	0	0	0	0	0.143070561	0	0	0	0	0	68.43127673	38.16137019	39.72794653	38.95463047	41.36109149	39.33246775	103.1109745	46.87213164	25.36291336	17.69427852	11.46875307	38.43159306	36.49429341	47.05491591	40.6031141	18.33416102	38.34590297	91.26009517	56.23944951	45.90042836	42.94183162	36.87064113	51.92378446	62.35151636	25.5957558	20.3890804	44.57038868	27.39036944	42.86407393	67.04376123	35.40788874	125.1315152
TCONS_00077456	NONMMUT011099.2	0	0	0	0	0	0	0	0	0	0	0	0	0	0	0	0	0	0	0	8.768807834	8.881107215	7.435860796	0	0.535475907	3.595124736	0	0	0	6.424841917	0	0	0	35.41819091	14.96477989	7.09E-05	0	3.82366718	0	0	9.244728589	0	0	0	0	0	0.629619195	0	0
TCONS_00521441	NONMMUT034788.2	30.21624632	2.647009956	4.180988562	0	4.098794509	0	0	0	0	0	0	0	0	0	0	0	4.508098582	12.24171049	16.65077227	1.162319495	0.746034694	6.295997851	29.67713178	6.309772118	13.54675813	53.79260088	17.48593767	16.93893892	14.81041855	7.045794986	21.62198038	7.075778841	0.722767819	0.675162539	7.970276179	6.940840844	9.768533998	11.4053346	8.809868598	0.891627684	7.808571522	10.47585264	7.170784176	9.778573148	9.45990686	7.478399201	9.027414669	0
TCONS_00035329	NONMMUT139470.1	0.071369401	0	0.087737905	0	0	0	0.122662069	0	0	0	0.757820757	0.261889238	0.46726967	0.238769746	0	0.170297152	0	2.837851685	4.990816304	2.778311973	5.504373438	2.254110473	10.86220455	2.899821369	6.882627388	0	0	0	4.664441108	0.062482222	0.226796546	0	8.998440745	1.67579472	4.634467486	16.38631498	0	0.129112203	1.605563918	1.165619551	0	0	0.449687084	5.215040646	0	0	2.998233367	0
TCONS_00586433	NONMMUT052232.2	10.8095842	22.68061568	10.45791636	18.04858809	11.78913829	7.445012913	8.838485881	8.315968953	14.59080127	10.95472458	15.10717694	10.6035363	8.372014269	14.52428024	7.425072737	7.806142066	0	0.71242667	2.400966149	1.990602592	2.270118523	2.226469936	1.041938086	2.553571729	1.36774116	0.406975528	0.385297086	0.179935403	0.133555937	0.834360478	3.145247592	0.183705347	3.966998741	3.841806129	4.492452145	1.32056907	1.094724432	1.486896769	3.059824776	2.622083817	0.625336071	0.505957626	0.651521626	0.619893572	3.948208205	0.830171041	1.062161249	19.19754456
TCONS_00683874	NONMMUT150142.1	0	0	0.065938448	0.131053316	0.143772835	0.130919038	0.419343608	0	0	0	0.105918096	0.063621218	0	0.078162137	0.254090354	0.09512748	0	0.108719474	0.247827726	0.070145317	0.121826097	0	0	0	0	0	0	0	0	0.156309851	0.277410838	1.399834742	0.884640719	0.409872405	0.414184247	0.702790635	0.980154678	0	0	0.07104258	0.161461774	0	0.131024428	0	0.862061515	0.107528996	0.255414375	0
TCONS_00811488	NONMMUT104400.1	0	0	0	0	0	0.013635979	0	0.063239308	0	0	0	0	0	0.034823853	0	0	0	0.683081386	0	0	0	0	4.872883944	2.492656669	0.935705921	1.01743882	0	4.380017574	0	0	0	0	0	1.522329739	0	0	0	3.673316513	0	0	2.014332553	0	0	0	2.343883548	0	0	19.83746271
TCONS_00403836	NONMMUT122193.1	0	0	0	0	2.350996203	1.711588128	0	0	0	0	0	0	0	0	0	0	3.687592516	0	0	0	0	0.032309128	0	0	0.120771544	0	1.527702947	0	0	0	0	5.850647884	0.012794129	0	0	0.664897807	0.505831108	0.339260279	0	0	0.484135186	3.419767592	0.675627926	5.037875063	0.115579739	0	0.387936693	0
TCONS_00209048	NONMMUT018070.2	1.350203736	0.687537204	1.044724248	0.670701617	0.611746974	0.645186363	0.510186533	0.171030707	0.405818819	0.090317161	0.226943369	0.485126876	0.420905667	0.309618874	0.247697462	0.369906841	1.35323268	1.191583383	1.006725106	0.826773271	0.488067585	1.023658297	3.444777555	1.064286065	1.238267362	1.881854841	1.594551992	1.720842218	1.076727966	1.82719256	2.185511581	1.524938083	1.859748361	2.257927037	2.221723077	2.462233857	1.903623157	0.865714667	1.279569483	0.619066044	1.472166179	4.277112789	1.962794624	1.888815715	3.149804787	1.461778276	1.194329513	1.608434275
TCONS_00819044	NONMMUT120536.1	0	0	0	0	0	0	0	0	0	0	0	0	0	0	0	0	0	4.620890712	1.480075582	0	0	0	0	0	8.053088983	16.21024226	19.12171645	12.90067866	20.2203689	0	0	23.60889264	0	0	0	0	0	0	1.891921312	0	3.367935012	0	0	15.2073531	0	0	0	0.489217427
TCONS_00463264	NONMMUT044546.2	2.212725709	0.89298716	1.224196625	1.594937522	1.642867168	1.249328428	1.719723051	1.017109404	1.753425225	0.773505204	1.716734826	1.970849313	1.071458864	1.34552402	0	1.492521721	8.87699222	0.497440119	0.43618352	0.058180747	0	0.585784588	0.887991734	0.541355348	0.947297527	8.756078485	0	0.900936564	0.368213719	1.047634394	5.494747543	1.809681371	0.195067674	0.546422801	1.487596875	1.248116702	1.017991091	3.176228337	2.707417371	0.340346479	2.361894341	1.789066165	2.410184238	0	3.04282457	1.290697502	1.25444784	0
TCONS_00819042	NONMMUT120536.1	4.825196863	0.332759398	6.682417337	1.845221063	16.22150295	18.8300057	0.96095076	1.229878055	2.502565598	0.557217271	1.649815627	0.72753941	1.132606361	1.745928678	1.391212407	0.962209722	0	5.364457611	9.172507017	1.091964353	3.059170963	11.68469664	1.056134493	6.873513423	19.50745959	5.960970558	21.01487368	4.297637148	4.415492841	10.52864318	26.23010682	1.182878728	8.260750163	1.578212535	7.20148582	15.64197823	12.67283792	11.99049043	1.37350962	1.198173119	2.170041234	5.242985897	17.71922791	6.160998238	7.789868874	8.304900012	7.292940755	0
TCONS_00819043	NONMMUT120536.1	0.453944497	0	0.707078154	0.231236564	0.753216633	1.056829308	1.118798469	0.904480197	0.189437236	0.396390509	0.54609647	0.457682429	0.89924971	1.205410248	0.508289061	0.749674073	0	0.073300594	0.370421057	0.167686445	0.059277153	0.020359388	0	0.258433306	0.18806441	0.299737476	0	0.400176337	0	0.023589646	0	0	0.027888076	0.038517269	0.038618082	0.16359782	0	0.09311691	0	0.305711136	0.368823215	0.37289077	0.105512213	0.186835923	0	0.147551979	0	0
TCONS_00125420	NONMMUT075201.1	0	0	0	0	0	0	0.019968244	0	0	0	0	0	0	0	0	0	0	0	0	0	0	0	30.01380802	0	0	14.08379512	0	0	0	0	0	0	0	0	0	0	5.822428732	0	0	0	21.75306564	0	0	0	0	0	0	20.49849816
TCONS_00125421	NONMMUT075201.1	61.13806776	52.73938463	35.04171393	55.14633256	24.81500402	35.43873764	46.13793834	40.15835161	79.34682002	49.30394435	83.39441435	45.19541054	37.55868408	66.87865188	29.7089051	45.80580957	0	0	0	0.170072061	0.294388181	0	0	2.082376521	0	0	0	0	0	0	0	0	0	0	0	0	0	0	0	0	0	0	0	0	0	0	0	0
TCONS_00475904	NONMMUT147405.1	9.60266784	1.324415514	2.851103849	6.477934729	1.689438168	1.129877249	1.278051506	0.746508407	1.520556036	1.038474539	1.000262971	1.955658289	1.113451404	2.460670842	0	4.387889342	0	0.534685253	0.039207777	0.108123592	0.376820057	0.201862485	0	0.494200682	0.017096765	0.203487764	0	0.029989234	0.267111874	0	0	0	0.334009386	0.37411184	0.155889507	0.159997868	0.034210138	0	0	0	0	0	0	0	0	0.065539819	0.334864036	0
TCONS_00531002	NONMMUT118584.1	2.529801141	0.579928443	1.38913603	2.272959343	0.823326873	0.953236772	0.978318098	0.526467236	0.714949262	0.45514851	0.763471961	1.015565259	0.344312334	0.919419358	0.971069402	0.965954774	2.59001507	6.796709886	8.6389163	1.646508291	2.403246567	6.094769181	0.249153445	5.143885498	4.894171096	56.77125477	2.57860075	8.955385017	2.50791339	8.205726716	23.04856791	32.23643054	7.423825071	6.713567569	7.602249398	3.718323785	11.2785353	5.396939638	5.775753384	1.187438467	9.81727605	13.68033526	8.408778137	14.93385605	2.665473219	10.75973763	14.52080643	21.34446996
TCONS_00227795	NONMMUT112143.1	0.486804045	0.331103878	0.702237103	0.852574965	0.448338587	0.218407481	4.370926922	1.098150577	2.176558461	0.434942138	0.593096576	0.913936299	1.866031902	1.433419424	0.108787512	1.652721455	0	0.027174651	0	0.231313512	0.325393875	0.078747703	0	0.294627312	0.070250605	0	0	0.033078125	0	0.388565467	0	0	0.20879215	0.197614774	0.273897863	0.140024801	0.088125317	0.237686644	0	0.320291511	0	0	0	0	0.059655803	0.029165219	0.175362822	0
TCONS_00701514	NONMMUT005149.2	0	0	0.569525544	0.109333502	0	0.278596694	0.558282313	0.234839169	0.341132934	0.694407896	0.568253663	0	0.526191694	0.775213784	0.425994126	0.292035044	0	4.944753273	3.797296032	1.145410359	1.970746336	2.180866143	22.31271339	4.445685485	7.844303294	4.958793321	0	2.059450657	0	2.408950403	0	4.478920059	0.545287422	2.654364769	3.037790472	0	2.012548238	0	5.767453169	1.335482908	0	0	4.250835703	0	0	0	4.611337656	5.070711436
TCONS_00508332	NONMMUT022630.2	0.211804194	0	1.594463348	1.393222569	5.750601123	4.300419715	1.735632623	2.748506788	1.776430055	1.618636676	1.606788149	2.021512889	1.9549978	7.333311368	3.861685781	3.827443106	0	0.441066286	0.436735742	0.348455006	0.723742715	0.479891034	1.071112353	1.266837874	0.486437144	0.50688802	0	0.228727887	0.32707849	0.194159476	1.924117311	0	2.488461841	0.299068255	1.078089312	0.575112336	0.436760838	0.317483437	0.143319379	0.41644253	0	1.164714454	1.045383594	0	1.86009283	0.443005483	0.324490261	0
TCONS_00501192	NONMMUT047254.2	8.228601161	10.76087605	10.82696546	11.266287	8.162494861	8.331583383	7.645404287	5.533439417	4.620420402	5.829857117	3.525007954	7.751607571	3.073271061	5.086058507	6.447068672	5.673232261	0	0.187843207	0.888357475	0.96195513	0.894141302	0.665212483	1.953633911	0.452722922	0.512937129	0.203487764	0.385297086	1.111430996	0.534223749	0.891817575	3.242024441	4.041517629	2.145327614	2.535341559	2.088820186	2.164637822	1.680230952	2.260671652	1.337987517	1.271742434	0.750403285	0.758936439	1.165880804	0.867851001	1.352126098	1.092330317	1.416214998	0.319959076
TCONS_00283331	NONMMUT027185.2	6.489294305	8.277596962	5.877202349	13.8993811	6.987601832	8.354859999	6.921786173	6.734986262	10.14221187	3.589289608	12.30955158	7.424567952	6.411505776	4.503385804	13.16518511	5.464520673	0	0.751372828	0.672270522	0.447049819	0.059728435	0.231883694	2.604845215	3.319459776	0.803547932	0	0.192648543	0.269903105	0	0.018962738	0.532272669	0	0.014885549	0.357350404	0.014171773	0.773323029	0	0.030977016	0	0.182751296	0	0.252978813	0.068581224	0.247957429	0.054085044	0.109233032	0	0
TCONS_00292480	NONMMUT090143.1	13.54356437	13.38735757	8.286651163	7.129276333	3.938391962	5.015831372	9.265527331	3.650457413	3.119853764	2.917560704	2.246549117	1.139648766	2.94906852	3.097929934	0.629699825	1.022825837	14.43849745	27.19566817	39.38878605	5.930089147	8.586042111	27.40237633	69.72298018	18.32613454	30.04308426	20.89330966	25.97210599	29.04241377	24.08107038	12.36507059	9.716734357	18.72233042	3.910515527	6.102455836	12.74177054	10.80588267	12.62949367	13.9384491	18.23483232	4.882431308	17.53292263	12.4488344	9.606137723	4.853766672	8.213517023	12.60287026	5.117953166	12.67645863
TCONS_00812740	NONMMUT046897.2	0	0	0	0	0	0	0	0.031619654	0	0	0	0	0	0	0	0	0	0.241900308	0.120048307	0.039250908	0.107199267	0.154929226	0	0.17127223	0.018686764	0.203487764	0	0.149976159	0	0	0.048388424	0	0.069344329	0.085100446	0.085129842	0.079998934	0	0.124186857	0	0.174257334	0	0.505957626	0.068581224	0	0.054085044	0	0	0
TCONS_00084529	NONMMUT034516.2	1.285910932	1.956161714	0.657960638	7.442913347	0.210252645	1.364075194	0.934092213	0.697276606	3.35700292	1.065513854	2.759745513	2.640723192	1.673104662	3.689343424	0.055477297	1.541918483	4.015527241	2.03759788	1.848791954	5.501690921	7.288408687	2.028286673	5.339932691	1.197458086	0.738426356	2.19868529	0	1.709536276	0.133555937	7.04533988	5.569507659	2.939285548	16.11467084	6.84320919	7.213985324	9.599872079	8.21043324	10.4338644	2.356416782	6.902135069	2.376277071	8.348300825	0.72010285	0.247957429	13.69325142	5.680117647	4.461077244	60.12095029
TCONS_00482929	NONMMUT035466.2	19.45575944	23.50920313	23.52361731	25.2521982	21.46782563	19.1617009	23.41408733	15.72546567	31.61364593	18.00754572	21.843635	27.81140572	17.73807276	41.39189247	14.10401917	20.43592686	0	0	0	2.283130187	2.481988554	1.943401782	2.89489473	4.35605826	0.620253519	0	0	0	5.511719974	0	4.112048313	0	1.248562615	5.159467677	2.021390889	1.838695499	0	0	1.413357683	0.912421603	0	0	0	0	0	2.683942975	2.466125987	0
TCONS_00600562	NONMMUT021887.2	0.101156937	0	0	0	0	0.013949607	0	0	0	0	0	0	0	0	0	0	0	0	0.209604345	0.072567425	0	0	2.996223209	0.150059778	0	0	0.202088322	0.09119726	0	0.30520527	0.681744513	1.112152169	0.099465237	0.239450296	0.201210838	0.319249079	0.176490105	0.198934397	0	0	0	0	0.21630518	1.490720063	0.111956041	0.235156871	0.193631996	0
TCONS_00204882	NONMMUT139616.1	0	0	0	0	0	0	0	0	0	0	0	0	0	0	0	0	0	0.155607225	0.99865786	0.264169327	0.205492361	1.133633004	0.484370968	0.633007912	2.294676441	0.755753555	0.323649552	0.72415003	0.854357331	1.815056407	1.517944876	4.647194157	0.550899274	0.203613155	0.381404936	1.833495568	0.06421243	1.104485506	0.320015467	0	0	4.781805521	0.66071151	1.023692246	0.467240694	1.510714675	0.075661286	1.555321068
TCONS_00329122	NONMMUT029641.2	0	0	2.344246834	4.821028312	1.64509227	7.313439349	2.990936692	8.346734876	11.51715171	7.47960097	5.36248829	7.436841495	4.955941016	7.537187613	7.653862409	4.752012685	4.78784698	2.200437069	2.74207141	2.701725949	1.663562997	3.328273039	3.564860919	2.752680462	1.356713747	4.260219827	11.04704541	4.34022186	11.80687908	6.436142955	8.666899099	0	13.91076115	6.995602121	6.591589383	13.97608043	12.79719177	0.710457862	12.69669015	0.851573367	36.50174195	2.189025668	16.80037668	14.70226382	2.359730466	8.643850109	2.264740214	0
TCONS_00206410	NONMMUT142880.1	0	0	0.056786604	0	0.039036882	0.054543917	0	0	0.144351661	0	0	0.100783896	0.072380832	0.074679752	0.161501779	0.08999186	2.67701816	0.032768204	0.478320476	3.489959892	1.892774183	0.170233549	1.045454627	2.926907305	0.57961451	0	0	0	0.447813058	0.317417274	0.127600275	0	1.876509489	1.189806679	0.51690126	0.823135698	0.035954856	0.67799395	0	2.026100057	0	0	0.109935702	0	1.651703156	0.184647517	0.035582402	0
TCONS_00482927	NONMMUT035466.2	5.065581732	2.630951418	4.235732694	4.660393186	3.250913438	6.366543307	4.995175755	3.371730165	2.502857414	0.402904405	0	4.495175053	2.341885536	1.938400111	2.763029431	2.940529471	0	5.629671348	9.636805851	1.616827215	1.231812689	6.61483793	0	3.25874725	5.786553816	77.09703705	10.03891558	7.593244025	20.5319549	9.382459432	0	19.17700115	6.059363573	6.189232426	4.814094713	2.797322725	19.18442989	4.538907272	0	1.266998846	10.20973697	3.739279833	27.23720447	58.36533544	14.63595373	5.136377462	0	74.08556416
TCONS_00323661	NONMMUT075201.1	15.05702355	22.26590807	9.902197139	9.217280137	3.332851852	6.836302795	5.592817742	8.761616353	9.901123198	5.790241995	4.219042853	6.580188436	3.567431852	7.901027226	5.208093769	6.219678007	24.36086526	0	2.278276779	0	0.689451957	0	0	1.679756921	0	0	0	0	0	2.245738116	13.22789521	0	0.317136616	0.900523019	3.599006868	1.759443222	4.088727333	0	3.096507503	0.807776621	5.254073671	0	5.524663353	12.09189198	4.508042495	1.326482243	0	0
TCONS_00403166	NONMMUT135292.1	41.47346643	23.04449884	69.33858363	32.74650949	8.000062397	34.07715783	41.04918242	46.42220503	105.5551091	76.00658403	149.0544018	83.93924327	62.51157858	138.6532937	66.53499477	74.92839235	0	14.23350593	16.07177928	49.83556591	49.47469495	20.56765082	41.75983655	44.00186831	27.57699566	44.19387956	0	8.395725934	0	39.40940537	44.1864221	0	34.58309674	36.99510049	43.54580631	14.26407659	17.69317574	0	4.124925161	33.44300255	22.97309632	0	5.428203862	29.27360611	59.45487749	17.46328139	0.000141621	9.596212606
TCONS_00403167	NONMMUT135292.1	0	0	0	0	0	0	0	0	0	0	0	0	0	0	0	0	0	39.33561982	48.78631161	0	0	16.21230306	35.89164125	10.40318556	10.9883299	0	25.27048	28.06479474	20.1933906	0	0	0	0	0	0	0	0	0	59.23718772	0	0	30.28055199	0	0	0	0	0	0
TCONS_00493130	NONMMUT047813.2	0.313948563	0	0.70786372	0.258398372	0	0.543952852	1.547297685	0	1.336857848	0.258801074	0.129753864	2.382113606	0.166301056	10.73979805	0.332917958	0.14575679	0	1.365515757	1.465501718	0.685077723	0.178468563	1.526443982	0	1.65819897	0.828885337	0	0.503968589	0.530749461	5.375626474	3.46989664	3.685939847	2.374391607	1.536121646	0.778572939	0.381915119	0.722737036	2.319892122	2.267145848	0.699398569	1.565741596	0.245632009	13.26190831	2.288281112	1.6588352	11.99335849	0.881008094	8.651197154	0
TCONS_00403169	NONMMUT092279.1	16.68222713	0	54.85737126	124.1398175	262.9470874	301.382811	60.67528131	48.5255444	1.219110082	2.215309546	1.226255148	0.373477876	4.734374069	3.243841877	93.96667602	1.166891824	0	0.894676323	0	0.192181201	0.274034058	0	0	0.48068452	1.41027791	0.932380935	8.839678403	0.122086171	0	0	7.442139687	0	2.597505928	0.084615471	0.426442831	1.017746438	0	0.101542658	0.662364138	0.01323755	0.256387789	0	0.716502335	13.87111051	0	0.140298906	1.094450951	0
TCONS_00581405	NONMMUT139470.1	0	0	0	0	0	0	0	0	0	0	0	0	0	0	0	0	0	0	0	17.87983979	20.92883021	0	0	26.53061761	7.008425381	42.60525059	0	0	0	7.004171776	13.52064518	0	21.97856483	41.62063561	0	0	0	0	3.996166328	11.6050172	0	4.873130872	0	0	0	0	0	0
TCONS_00830278	NONMMUT038240.2	0	0	0	0	0	0	0	0	0	0	0	0	0	0	0	0	13.42658458	0	0	0	0	0	0	0	0	0	0	0	0	0	0	0	0	0	0	0	0	0	0	0	0	0	0	0	0	0	0	7.014462822
TCONS_00033009	NONMMUT145089.1	0	0	0.182270955	1.536399973	0	0.106197007	0.142493975	0	0.170809647	0.280336812	0.503572565	0	0.073626037	0.190730241	0.054177048	0.060726729	2.67701816	0.05924366	0.795055931	1.163158794	0.997272399	0.50484172	0	0.197131048	0	0.406975528	0	0.765625141	0	0.56988717	0.681938066	0.908974056	1.440080085	0.994455125	0.533269659	2.748390043	1.91679406	1.225946386	0.429887796	0.439818805	0	0	0.27459922	0.911491509	3.138338758	0.78569135	1.815375195	3.084725451
TCONS_00557214	NONMMUT149304.1	6.070513363	18.52095765	7.613254152	13.02715716	6.876463829	4.061940073	3.938106847	2.448309795	16.2592594	2.880365029	11.52627244	7.299840586	3.696323781	8.096893985	2.716924763	4.316670147	0	0.174422853	0	0.026998968	0.015343571	0.293719346	0	0.177056361	0.05130739	0	0	0	0	0.037925476	0.290330547	0	0	0.025525029	0.068307947	0	0	0	0.0351704	0.007945709	0.500268857	0	0	0.123978714	0.128289724	0.764631222	0	0
TCONS_00557215	NONMMUT149304.1	13.12955601	26.17806594	6.915809001	4.570431736	10.7298725	7.873373569	3.450636289	1.599005893	1.191241652	2.729561691	0.839287608	0.831643199	1.798605395	1.021958192	1.130295745	1.170652677	1.33850908	0.117777691	0.120048307	0.041422137	0.057657849	0	0	0.299494084	0	0	0.577945629	0.359870806	0	0	0	0	0.014885549	0	0.045094583	0	0	0	0	0	0	0	0	0	0.142135495	0	0	0
TCONS_00309666	NONMMUT101837.1	17.08460573	28.04482961	10.82475605	17.7420666	10.734635	10.88854769	8.936575684	5.670542236	7.294330643	7.966441578	7.561925395	6.677692681	5.898958345	6.541712961	3.082836543	4.912812891	0	0.936826252	1.421131863	0.942185992	0.848887058	1.826748825	1.044933658	2.30793976	0.82606437	0.203487764	3.133621203	0.691311819	0	0.417521569	0.290427324	0	0.081907732	0.179287803	0.383133892	0.239996802	0.136908974	0.278855098	0	0.323390337	0	0.252978813	0.068615514	0.620265509	0.162255132	0.021846606	0.283243	0
TCONS_00309664	NONMMUT101837.1	0.911070721	2.011621614	0.653325799	2.248097138	0.907880759	0.92458758	0.977573484	0.700691528	1.293328625	0.560141877	1.177352656	0.871240466	0.645784329	0.482327771	0.538736562	0.525776852	0	0	0	0	0	0	0	0.026132835	0.018173861	0	0	0	0	0	0	0	0	0	0	0	0	0	0	0	0	0	0	0	0	0	0	0
TCONS_00499899	NONMMUT115959.1	6.836980132	10.74696969	9.511132555	4.27326518	6.279277613	12.72310508	8.513225842	4.263341163	3.6352495	1.129217098	5.690705697	3.112892427	2.541939586	2.323046976	2.935691682	1.045090724	0	0.6790845	0.85467192	2.685304884	2.928465239	0.864879802	0.188200067	3.195812807	0	0	0	0	0	0	0	0	2.104355141	5.203336694	3.195777401	0	0	0	3.099989373	2.382735239	0	0	0	0	0	0.272842267	0	1.657068054
TCONS_00499895	NONMMUT115959.1	3.90469068	1.520760114	4.647506762	2.238970963	0.263420878	4.505436665	8.360380681	14.80327847	13.90065637	16.15818419	22.46856855	18.66596632	9.117070552	17.31219082	33.04610288	4.516927715	0	0.237298149	0	0.784712537	1.363759438	0	0	0.238990048	0.034313206	0	0	0	0	0.06149616	0	0	2.767990118	2.689300025	0.659398441	0.112398502	2.554197361	0.133851686	0.047902084	0.993714147	0	0	0	0	0	0.237996929	1.619123202	0
TCONS_00499896	NONMMUT115959.1	2.638363819	0	3.811193178	3.763981277	2.114784031	3.084744884	3.910723924	0.71153707	1.65294324	2.80964273	1.998399747	4.32724884	1.496418069	1.587776151	2.868241258	1.304573839	0	0	0	1.06608293	0	0.067493614	0	1.461991238	0.410082993	0.563864594	0	0	0	0	0	0	1.579825617	1.637141318	0.814848623	0	1.605208119	2.752214942	0.686068987	0.537090169	0	0	0.96894982	0	0	0	0.707399392	0
TCONS_00499891	NONMMUT115959.1	5.646466116	1.267465647	6.222527351	2.61216891	2.201641093	6.430236966	11.9194265	10.49393071	11.64370259	8.800964705	10.19298014	8.96831809	6.810130227	15.7670913	19.79824359	7.011574775	0	0.46182296	0.162905553	0.710407216	1.301608683	0.228003507	0	1.075907939	1.239771878	1.140345429	1.157817744	0	0.252287165	0.834550106	0	1.333149701	2.219651159	2.038505381	1.056179751	0.917587773	1.855797383	1.777337271	0	0.667487191	0	7.187128074	0	0.584187703	0.575897548	0.301614247	0.293368937	0
TCONS_00269596	NONMMUT139470.1	0	0	0	0	0	0	0	0	0	0	0	0	0	0	0	0	0	0	0	0	0	0	0	0	0	0	0	0	0	0	0	0	0	0	0	0	0	0	0	0	0	0	0	0	0	0	0	0
TCONS_00272218	NONMMUT112143.1	0	0	0	0	0	0	0	0	0	0.092337799	0	0	0	0	0	0	0	0	0	0	0	0	0	0	0	0	0	0	0	0	0	0	0	0	0	0	0	0	0	0	0	0	0	0	0	0	0	0
TCONS_00048612	NONMMUT047750.2	40.34110119	17.48609248	18.07605084	17.72604162	29.68989078	14.76929287	11.79748807	3.741363918	3.720411144	3.521305804	3.80812764	4.4882737	2.062827225	2.745686664	3.179109157	2.890816671	4.015527241	1.162822501	2.189176925	1.669789712	2.172893905	0.95549995	8.815577662	1.972519729	2.935753819	3.886005829	1.882946861	2.692853266	2.077329048	1.033943297	3.210523577	1.377790101	1.136987984	0.998598688	1.693441882	1.489686816	0.829356388	1.451737856	2.916857101	0.71938856	1.189764409	2.283133786	0.810287159	0.807845304	4.992211808	0.908556664	2.483651648	0.569847114
TCONS_00365687	NONMMUT075201.1	7.486052192	0	0.535913138	0	10.46961361	0	1.015769043	0	0	0	0	0	0	0	0	0	0	2.256967439	0	0.140609933	0	4.118671798	0	0	0	13.30484396	8.697503778	0	0	3.582421528	0	20.7386803	0	0.973541618	4.170256879	3.222223729	4.29306449	7.711480321	0	0.496662404	9.407555856	0	1.443394726	8.097917694	0	5.946821017	0	0
TCONS_00709363	NONMMUT034788.2	23.99026725	16.56496149	17.39767531	8.581578244	15.90862234	12.4056322	11.2302599	3.196652141	10.776474	7.19506336	9.721580268	8.461863418	4.358852138	5.814486445	0	2.810732607	0	3.779645346	4.70457312	1.036041503	0.872579338	3.664736279	5.937614426	3.728381756	7.363781631	12.76763626	13.39061494	7.214839872	10.37035142	8.417407762	22.88835383	16.05878659	1.706747248	3.816621434	5.698214964	7.782749626	10.87068203	10.60433092	10.27267586	3.728746211	13.05714223	13.39598708	10.88918955	6.149096281	13.19226165	9.166071387	6.578000018	0
TCONS_00183569	NONMMUT013641.2	0	0	0.012971659	0.014375531	0	0	0	0	0	0	0	0	0	0	0	0	0	0.029731405	0	0.062778645	0	0	0	0	0	0	0	0	0	0.064625012	0	0	0	0.051849842	0	0.267676433	0	0	0.16104526	0	0	0	0.048452635	0	0	0	0.080511823	0
TCONS_00183568	NONMMUT009005.2	0	0	0	0	0	0	0	0.164264102	0.754198518	0	0.648713368	0.466475115	0	0.275543734	0	0.211208289	0	0	0	0.063175487	0.066942302	0.074542878	0	0.028652595	0.138500889	0	0	0	0	0.075244145	0.776053552	0	0.022365537	0.033667513	0	0	0	0.137847721	0.090493438	0	0.213864936	0	0	0	0	0.152554852	0	0
TCONS_00183567	NONMMUT013641.2	0	0	0.007836021	0	0	0	0	0	0.046301476	0.020445657	0	0.055150461	0	0	0.04458771	0.026262769	0	0.010435734	0.072221062	0.019463524	0	0.042403798	0	0	0	0	0	0	0	0.035403432	1.262260441	0.879948611	0.128492057	0	0	0.05530593	0.209331837	0.059568802	0.103365805	0	0.750028084	0	0	0	0.223695742	0.116114713	0.115563144	0
TCONS_00121248	NONMMUT068890.2	2.468580348	1.986623271	4.075123722	8.529518111	4.411167637	3.763843928	3.400138866	3.32006365	3.161340275	3.109813691	3.077387896	5.436636281	3.55015795	5.455435112	2.654675336	2.989546986	0	0.615708289	0.840338152	0.588809227	0.623830317	0.881158038	0	0.822067387	0.615483522	0	0	0.38986004	0	0.834379441	0.629049518	2.939285548	2.209022877	1.420893274	1.191350125	3.546619407	4.10521662	3.549067702	1.055111992	0.158914171	1.375739357	0	0.960137133	0.495914858	4.492574172	0.393238914	3.328105246	2.879631684
TCONS_00427832	NONMMUT041742.2	0.331941771	0.572478606	0.614302807	0.304944272	0.86041191	0.929837432	0.857638171	0.148960189	0.335199341	0.136818402	0.116437167	0.118007098	0.177958291	0.378657162	0.141781334	0.16034195	0	0.355973313	0.16806763	0.350950096	0.156986236	0	0	0.168234221	0	0	0	0	0	0	0	0	1.440481995	0.802072982	0.636907837	0	0	0	0	0.429886669	0	0.272458181	0	0	0	0	0	1.279836304
TCONS_00224699	NONMMUT021642.2	0	0	0	0	0	0	0	0	0	0	0	0	0	0	0	0	0	0	0.024009661	0.068421106	0	0	0	0	0.067668994	0	0	0	0	0.037925476	0	0	0	0	0.014171773	0	0.068420277	0	0	0.198642713	0	0.505957626	0	0	0.054085044	0	0	0
TCONS_00224698	NONMMUT022126.2	14.41875838	5.830242644	4.163116935	9.53786412	7.570851882	6.633385786	5.131356242	5.842995828	6.006449251	4.350990037	7.834358153	7.21084734	4.11389124	6.52995991	1.610575273	6.487235897	0	0	1.635994324	0.13959274	0	0	2.805548539	0.331607627	0	0	0	0	0	0.019038589	0	0	0	0	0	0	0	0	0.070727674	0.088078179	0.8754705	0	0	0	0.105790346	0	0	0
TCONS_00224695	NONMMUT021642.2	10.6205458	8.011223892	4.415754967	7.656114277	7.385231509	10.0395307	7.513974648	0.785274102	4.668424138	2.331123957	1.346385181	1.20848121	1.413545726	1.103498244	3.425127131	2.242116785	0	0.060621177	0	0	0.097264437	0	0	0	0.120395416	0	0	0	0	0	0	0	0	0.035335148	0	0	0	0	0	0	0	0	0	0	0	0.152926244	0	0
TCONS_00224694	NONMMUT022126.2	4.987684308	3.30640333	4.114038698	6.74709669	3.979068393	4.723148711	4.06151353	2.359869623	5.758794717	2.847130866	6.635631639	3.596550502	3.052923887	4.423325767	1.890183016	4.779966259	0	0	0	0	0.028517009	0.015458913	0	0.329945657	0	0.203487764	0	0	0	0.017275054	0	0	0	0.219430165	0	0	0	0	0.034783525	0.006531372	0	0	0	0	0	0	0	0
TCONS_00224691	NONMMUT021642.2	10.8760713	2.219554849	7.058782017	9.265391212	16.48102014	6.623745149	10.7379441	5.109451479	9.392390594	5.096365846	7.899822586	5.484945751	3.502098349	3.565562039	2.270560068	2.441126001	0	0	0	0	0	0	0	0.133535391	0	0	0	0	0	0	0	0	0	0	0	0	0	0	0	0	0	0	0	0	0	0	0	0
TCONS_00224690	NONMMUT022126.2	3.637590286	2.489073406	3.120307504	3.165602791	4.044611317	2.803011915	3.162606956	1.057139886	2.036000409	1.660538309	2.181308493	2.069963203	1.096839844	1.572505891	1.931899343	1.324357827	0	0.012428959	0.048019323	0	0.006948408	0	0	0.030386048	0.017096765	0	0.192648543	0	0	0.020555608	0	0	0	0	0	0	0	0	0	0.008676714	0	0	0	0	0	0	0	0
TCONS_00224693	NONMMUT022126.2	11.57846469	1.623567868	8.677116752	10.25196925	3.896739609	5.15210935	6.266588659	2.489099148	9.457368295	5.488927779	9.581363285	4.09962492	4.730426506	4.374067427	1.819915385	6.159504345	0	0	0.117503283	0	0	0	0.711122744	1.085915498	0	0	0	0	0	0	0.43549582	0	0.193623775	0.141349102	0.141717733	0	0	0	0	0	0	0	0.137162448	0	0	0.151156669	0	0
TCONS_00130941	NONMMUT050690.2	18.65149596	10.42977217	5.936237635	5.526272139	12.10143334	4.990795714	4.102970709	1.99203819	6.809040593	1.757715002	5.147630662	3.782665703	4.053538554	4.704981087	2.112904859	7.332084855	5.354036321	4.312024301	5.16207722	1.539338032	2.701052542	2.457967158	8.494139763	8.535929864	5.573870066	5.290681864	3.66032232	2.999883042	2.804674682	0.51199393	4.210325203	2.755580201	2.158404568	2.637586317	2.125765999	2.373301708	3.489434127	2.075460073	1.090282391	2.598596303	1.250672142	2.782766942	1.371624475	0.743872287	0.97353079	2.119120814	0.849728999	1.919754456
TCONS_00340187	NONMMUT031449.2	0	0	0	0	0.097279909	0	0	0	0	0	0	0	0	0	0	0	0	0	0	0	0	0	0	0	0	0.184970377	0	0	0	0	0.0647921	0.334343731	0	0	0	0	0	0.042996098	0.032602961	0	0	0	0.061585939	0	0	0.07969642	0.03398916	0
TCONS_00029023	NONMMUT135292.1	0	0	0	0	0	0	0	0	0	0	0	0	0	0	0	0	8.875653711	0	0	0	0	0	0	0	0	0	0	0	0	0	0	0	0	0	0	0	0	0	0	0	0	0	0	0	0	0	0	0
TCONS_00029024	NONMMUT011099.2	0	0	0	0	0	0	0	0	0	0	0	0	0	0	0	0	0	0	0	0.355497819	0	6.085215573	0	0.460621746	1.376870832	1.300693787	10.52361932	0	0	0.533763153	0	0	2.375190258	0.892678326	0.762597295	4.610391898	3.910253041	0.247630266	0	0	0	0	1.590672904	11.35372272	0	0	0	0
TCONS_00263990	NONMMUT064904.2	264.1029337	572.4395356	261.9839792	262.0958211	246.0534474	336.9308547	293.3492753	104.0684702	150.8972399	125.6564827	215.716107	169.7941653	89.92486501	153.6310501	123.4178609	144.1123491	88.446003	56.87155544	98.32921568	92.08022524	83.2034017	112.7070232	90.21738137	61.60970433	58.80127827	142.0906219	82.60191585	62.39299092	103.6781385	100.5241866	136.0049092	121.2986197	115.2180101	109.7902196	122.1759633	168.0138945	143.1104171	122.0666973	75.55206792	61.74234272	85.14550933	72.58771674	99.40087134	80.81106181	113.8844431	97.08531361	111.4561204	90.00192839
TCONS_00062707	NONMMUT081654.1	2.962296418	0.662207757	4.725356354	5.911558054	1.873770324	4.336241433	5.558397692	3.604640535	8.608572749	4.466671512	7.721613851	6.367111682	3.974057406	5.154086903	6.609599815	5.6893028	0	0	0	0.127719397	0.092910898	0	0	0.309757789	0.377428173	0	0	0	0	0	0.048388424	0	0.95267512	0.127625144	0.311779013	0	0	0	0	0.039728543	0.125067214	0	0.034290612	0.247957429	0	0	0	0
TCONS_00634913	NONMMUT109394.1	0	0	0.152488184	0.155530247	0	0.151223011	0.13904358	0	0	0.107412815	0	0.07227306	0	0.303333169	0.084732903	0	0	5.849531386	5.952043102	2.820810602	2.335640616	3.870710835	2.42654356	2.649090309	2.448684096	1.519850109	4.921977629	2.869819735	3.461102114	3.836142965	7.699614493	3.948562723	3.386767494	2.879869891	5.320707266	4.488660187	6.126214762	3.940648161	2.627404711	1.846272781	4.496041285	3.616079151	6.09107568	4.558077438	5.796077815	7.993520332	3.83415427	0.729826652
TCONS_00226121	NONMMUT039385.2	16.51205966	10.92642799	11.87147367	14.78801529	9.017519682	9.003169002	9.877012849	11.13479785	10.55401292	10.0500109	5.930965763	17.67454574	7.366021377	24.30786753	14.19189434	18.3763379	0	0.573965355	0.624251199	0.51143408	0.698782866	0.695651082	0	5.937991288	1.436128218	0.406975528	0.963242716	0.53980621	0.133555937	0.644733097	0.387107396	0	0.11908439	0.042541715	0.04251532	0.933320897	0.376311523	0.743448384	0.070340799	0.850190813	3.001613142	0.505957626	0.274324895	0.123978714	0.97353079	0.24031267	0	0
TCONS_00493926	NONMMUT048727.2	0	0	3.735258403	0	0	11.42825975	0	7.593839299	7.195745462	1.700312955	3.712336948	0.875626748	2.443118025	3.150130889	2.367320275	2.381789841	0	0	0	0.310421994	0.759374044	2.030620968	0	0	0.831107916	2.238365404	4.156392319	0.346585576	1.46911531	1.36340191	0.277410838	0	0.811329392	0	0	0.745456733	0.855903455	0.306796367	0	0	0	0	0.652756088	3.26460751	0.891051098	0	0	0
TCONS_00217839	NONMMUT018034.2	0	0.331103878	0.078939565	0.013905979	0.040364136	0.325995358	0.105619844	0.041200409	0	0.069073884	0	0.109636944	0.066923127	0.313971856	0.083107591	0.046473409	0	0.054171894	0.123313621	0.120352725	0.355875286	0.07466655	1.237952689	0.644528519	0.35128722	0.203487764	0	0	0.133555937	0.093656964	0.415075905	0	1.544814806	0.456591716	0.040049431	0.032426235	0.236494687	2.041880988	0	0.273364157	0.427354671	0	1.25812255	0.630431763	0	0.248155601	0	0
TCONS_00520059	NONMMUT115364.1	0	0	0	0	0	0	0	0	0	0	0	0	0	0	0	0	0	0	0	0	0	0	0	0	0	0	0	0	0	0	0	0	0	0	0	0	0	0	0	0	0	0	0	0	0	0	0	0
TCONS_00831831	NONMMUT061375.2	3.949728557	3.642142663	4.703576536	8.452198461	4.801536454	3.408994837	2.726755987	5.659918032	1.60498814	1.462303173	1.39881268	3.340013333	2.013522419	3.151558667	2.492144193	1.725347019	0	5.04590684	6.7231614	5.11947238	6.258677202	4.483084753	6.512113038	4.246386132	7.420406115	5.901145156	8.928296732	12.5228443	14.59793105	8.974096866	9.350192041	51.98861313	8.596419288	3.709952338	6.923435627	19.46648727	25.31054202	12.95406149	10.41054383	3.993187337	16.63569044	18.72447981	15.9109125	14.02980327	18.92067908	7.254602565	15.25971661	31.9959076
TCONS_00831832	NONMMUT136346.1	0	0	0	0	0	0	0	0	0	0	0	0	0	0	0	0	0	4.249785586	0	0	0	0	0	4.912448775	3.102601144	16.47538681	0	0	0	0	3.7371348	0	0	0	0	0	0	0	0	0	8.052452589	0	0	0	0	0	0	0
TCONS_00169009	NONMMUT056424.2	0	0	0	0	0	0	0	0	0	0	0	0	0	0.035955628	0	0	0	0	0.818897524	0.360939577	0.474688416	0.659322637	0	0.138610654	0.15487959	0	3.752215675	0	0	0	0.936074072	0	4.920522338	1.187739152	2.45846255	0.805669264	0	0.070410757	0.19269862	0.488541889	0	0.985605455	0.085349333	0	0	0	0	0
TCONS_00354478	NONMMUT065935.2	2.358865666	1.655519392	0.648091965	3.298907551	0.702663871	1.309054018	1.192976719	2.088762711	3.015432263	1.143281796	1.79048023	1.951694538	1.298192086	1.706682196	2.004550764	3.128777589	0	0	0.048019323	0.324051479	0.245550231	0.266604413	0	0.202533939	0	0	0	0.029989234	0.133555937	0.132739167	0.241942122	0	0.133969939	0.297792003	1.048711226	0	0	0	0	0.476742512	0	0	0	0	0.162255132	0	0.035405375	15.35803565
TCONS_00634978	NONMMUT047390.2	130.2089459	354.5192137	140.1753202	121.7670361	130.491122	150.3896617	114.5943325	54.29935642	57.771159	59.14955186	72.66982944	66.03141974	37.13128745	72.8907811	42.57243241	65.70556192	44.93107281	22.97016654	49.77961532	34.49680843	37.42881027	41.66415105	21.90388293	22.83085271	25.14255316	78.68281719	29.81428854	24.98085187	40.30424363	53.32712599	75.07381799	57.1720432	61.89801915	61.16800051	65.68789834	98.84868281	89.42708096	68.05665907	49.16522933	35.85868069	58.33760209	44.78964584	63.80289559	47.32676662	61.2604526	53.28284606	47.45382405	37.09797502
TCONS_00672053	NONMMUT090301.1	2.019573012	0	0.516931899	4.179342634	1.286421401	1.204016069	0.709638246	1.727539786	3.592012093	1.680611744	2.094917822	2.175455311	1.880868383	3.306176573	0.893433693	1.037885055	2.196493401	4.216057294	3.111027878	10.38259715	11.98564524	4.74322734	3.905183947	2.676956596	1.838227022	0.203487764	0	4.605206731	2.036594487	8.585929616	6.373868439	14.62790565	14.93438079	9.080477971	10.33054251	8.226423714	18.84465479	13.96326169	6.503675147	2.196877171	3.452855651	2.974018924	7.522845889	3.071076737	13.00496515	7.993258172	8.831799972	16.60139662
TCONS_00662522	NONMMUT136346.1	0	0	2.059164926	3.197929677	0.566425154	1.645726348	1.899856746	2.366383272	2.777894018	2.073599075	1.946643678	4.308214789	2.079968659	4.081721184	1.174016623	3.161013479	0	0	0	7.727434046	13.04644879	8.498336424	0	17.02236401	0	0	0	0	0	0	0	0	2.713047558	5.38306693	0.047886422	0	0	0	0	1.378254657	0	0	0	0	0	0	0	0
TCONS_00536556	NONMMUT115959.1	0.355146426	0	1.654853736	0.682825704	1.131366907	0.452059987	1.00985408	0.178967241	1.140417027	0.372568261	0.321838821	0.642127624	0.922829117	0.837130594	0	0	0	0	0	0.015408433	0.189544869	0	0	0.09358855	0	0	0	0	0	0	0	0	0.098043667	0.780351183	0.131414854	0.120185065	0.413600574	0.057369434	0	0.365240384	0	0	0	0	0	0	0	0
TCONS_00241151	NONMMUT139470.1	0	0	0	0	0	0	0	0	0	0	0	0	0	0	0	0	54.37559288	14.90182076	34.77055167	49.18463944	58.59704532	23.5235341	11.31271253	32.47604905	37.05304835	2.844148477	21.6078459	15.26047149	10.92140321	23.85017531	18.37347189	2.583264586	46.1483643	36.02356684	32.70099849	15.31424927	4.05345668	7.685831351	9.171420307	32.13486877	4.192628223	5.545295578	6.366292131	20.30647365	4.102512835	7.231117464	19.23874967	0
TCONS_00241156	NONMMUT136346.1	0	0	0	0	0	0	0	0	0	0	0	0	0	0	0	0	14.68746014	17.75365633	19.83851102	8.717190952	6.204238052	11.51981188	34.71711654	15.6683174	13.02740971	12.42007916	6.535794475	18.28539554	11.92400763	13.30698772	14.49702681	11.86901875	13.37226153	18.79938796	11.12358078	12.15781133	13.95147605	16.17130339	17.81176758	11.48361472	20.83394668	10.80067744	24.05993925	14.18031343	23.40903462	16.49632875	13.67472419	0
TCONS_00241159	NONMMUT057411.2	0	0	0.876642579	0	3.799654884	1.669725671	1.207491451	0	0	0	0	0	0	0	0	0	9.666712578	0	0	0	0	0	0	0	0	0	0	0	6.673523072	0	0	0	0	0	0	0	0.806127704	3.41859251	0	0	0	9.170987924	0	0	0	0	1.374188818	0
TCONS_00379281	NONMMUT135292.1	6.579205487	4.22405773	3.710964774	0	0	0	0	0	0	0	0	0	0	0	0	0	0	0	0	0	0	0	0	0	4.369078168	0	0	1.549573703	6.756594865	2.42285009	4.218454459	4.524111575	0	0	4.225611825	2.819882424	4.875047367	4.161204515	7.510181646	0	10.09104818	8.886639739	4.309815555	5.816213433	5.790290716	3.296849515	3.801722947	0
TCONS_00379287	NONMMUT135292.1	0	0	0.022152962	0.07045696	0.043877455	0	0.070423717	0	0.105880581	0.08356398	0.057407272	0.042675713	0.083614168	0.129196493	0	0.032804759	0	0	0	0	0	0	0	0	0.018088377	0	0	0	0	0	0	0	0	0	0.015716497	0	0	0.068025527	0	0	0	0	0.036622373	0	0	0	0	0
TCONS_00077461	NONMMUT136346.1	0.788080562	0	0.110853185	0.954636422	0	0.345972068	0	0.298900587	0	0	0	0	0	0.893980534	0	0.445676985	32.13224898	24.86420003	31.29325641	7.039879479	8.698942126	23.07250486	50.85322096	13.11789091	18.03305171	59.25767175	64.0750981	28.24359055	39.51092136	14.59078405	26.45487105	18.7388639	6.82995866	8.93070561	18.40683773	16.0773591	21.18910979	19.89985193	32.47339279	7.242123992	41.08382948	102.1427255	32.95094626	24.27528025	26.22329579	28.61250032	16.7601964	0
TCONS_00077462	NONMMUT075201.1	15.51288805	4.22753432	10.39512018	10.46432739	9.823748401	22.72216419	5.822169383	8.191798572	7.231298382	10.24821945	6.134968604	8.604960857	12.10429002	17.95479538	15.1902148	17.33361747	0	6.422891468	7.91761805	7.974666869	10.69204017	7.891821434	18.17387482	21.72121692	9.058241961	13.30179164	16.03298236	8.624033972	6.49936613	7.138086633	2.408291887	5.439147907	9.160120133	3.880663731	6.123311477	7.552352696	6.13565676	9.472337819	4.745893739	3.927412762	4.132345826	30.48040525	4.652344477	0.320980892	9.71897422	7.954611526	7.526828662	0.590964413
TCONS_00621518	NONMMUT056620.2	1.098737684	2.483279089	0.746709959	0.551350994	1.057040684	1.023162075	0.356900896	0.759187888	0.693403512	0.806819129	0	1.850407628	0.541584543	1.010501145	0.921768289	0.401004994	0	5.583534969	3.86267434	0.671087887	0.822686185	4.640796583	5.471347132	3.869667049	4.007703857	0	0	2.071896189	0.715459156	0.029619797	0	0	0.081870518	0.808360648	0.227896287	0.720017072	0	1.115172577	0.19181936	0.293991216	0	0	2.218465427	0	0	0.450586256	0.778918249	0
TCONS_00077667	NONMMUT047080.2	0	0	0.039278301	0	0	0	0	0	0	0	0	0	0	0	0	0	1.33850908	0.344379213	0.840338152	0.761754975	0.405443251	0.711202749	7.163324342	0.224878198	0.136774116	0.813951056	1.348539802	0	0.934891561	0.094813691	0.145165273	0.183705347	0.089313292	0.799903355	0.540270515	0.959987208	0.239470969	0.557586288	1.090282391	0.656577734	0.125067214	0	0.137162448	1.239787145	0	0.393238914	0	0.319959076
TCONS_00271899	NONMMUT059057.2	0.200064723	0	0.307981158	0.424355093	0	0.251624727	0.26411778	0.172548451	0.429504553	0.347416647	0.56036436	0.910515803	0	0.208351111	0	0.362811785	0	0	0.144730239	0.760915676	1.849802892	0.496215647	0	0.08325932	0	0	0.433844519	0	0	1.252223376	0	6.993111435	7.906094522	3.942187559	3.410493939	0.903907955	2.508492616	0	0.301058622	0.123523985	1.220530944	0.84166051	0	0	0	1.213229436	0	5.977795416
TCONS_00684078	NONMMUT022806.2	8.777174571	4.138798481	3.434700844	12.32456209	4.567315164	2.645379994	2.537980573	2.972468796	1.653624144	0.877381904	1.678575216	3.561339518	1.377673234	3.633869027	2.979737622	5.420054106	1.33850908	1.166443701	1.440579689	2.678462773	2.661001309	1.067159678	1.172180347	1.906344743	1.272529279	0.406975528	0	0.629773911	3.211352511	2.578932388	6.000164637	5.565720891	3.12650856	2.579508368	2.763495799	3.359955227	2.634180664	2.957964282	0.808919194	4.584975763	0.500268857	1.264894064	1.26875264	0.495914858	4.867653952	1.376248813	0.991350499	0
TCONS_00221480	NONMMUT092777.1	0	0	0	0	0	0	0	0	0	0	0	0	0	0	0	0	0	0	0	0	0	0	0	0	0	0	0	0	1.779499308	0	0	0	0	0	0	0	0	0	0	0	0.409845261	0	0	0	0	0	0	0
TCONS_00271895	NONMMUT023055.2	0	0	0	0	0	0	0	0	0	0	0	0	0	0	0	0	0	0	0	0	0	0	0	0.036736082	0.082868018	0	0	0.091437174	0.900300573	0.319294585	0	0	0	0	0	0.29914268	1.751148569	0	0	0.253809768	0	0	0	0	0	0	0.430352333	11.81256913
TCONS_00712548	NONMMUT056775.2	4.497149964	0.206112164	2.622396122	5.010005147	1.682723824	1.985875853	2.263448682	2.559990412	7.083444929	2.96770441	7.046994472	7.271128544	4.571384728	5.413907668	2.506555287	4.431739634	13.69562491	12.71646332	13.53270956	7.773695836	6.388633003	10.45070437	4.831076179	9.066676008	10.55738885	44.79498242	11.73691984	10.12862382	15.60066903	7.16770643	22.03884665	6.741251405	20.73126748	22.01190854	20.1836805	7.095798779	26.35959592	17.74190006	14.36292301	7.923174508	7.596207392	1.7516253	15.94623183	32.67273052	27.47390426	15.48957159	20.2540342	46.86152622
TCONS_00833224	NONMMUT009005.2	0	0	0	0	0	0	0	0	0	0	0	0	0	0	0	0	0	0.226622393	0	0	0	0	0	0	0	0	0	0.746402042	0	0	0	0	0	0	0	0	0	0	1.404565083	0.059799402	0	0	0	0	0	0	0	24.38792069
TCONS_00603468	NONMMUT057245.2	1.086339925	3.476590724	0.669861964	0.301958399	1.278614025	0.56278414	0.341064736	0.089799817	0.097272008	0.186111313	0.167857522	0.100602811	0.110028403	0.104471558	0.192436873	0.084366382	2.67701816	0.709629893	0.177047244	0.268087576	0.381020957	0.225282738	3.516801525	0.024750839	0.035339012	0.212237738	0	0.869687782	0	0.019417844	0.201199069	0.764765359	1.049014391	0.433040623	1.174003874	1.752216651	0.889463601	2.268632745	0.771814422	1.192396589	3.877083642	0.252978813	0.251144441	0.127078182	0	0.45268353	0	0.319959076
TCONS_00639008	NONMMUT060206.2	0	0	0	0.127742369	0	0.084052177	0	0	0.399301595	0.096724708	0	0.309434127	0.263930399	0.446476615	0	0.204492479	0	0	0	0	0	0	0	0	0	0	0	0	0	0	0	0	0	0	0	0	0	0	0	0	0	0	0	0	0	0	0	0
TCONS_00838959	NONMMUT023203.2	0	0	0	0	0	0	0	0	0	0	0	0	0	0	0	0	0	0	0	0	0	0	0	0	0	0	0	0	0	0.431629846	0	0	0	0	0.07288543	0	0	0	0	0	0	0	0	0	0.701537105	0	0	0
TCONS_00639003	NONMMUT060206.2	0	0	1.058373458	3.655322005	0	1.706229188	1.10537444	1.697216538	0.927245421	1.74149673	1.197439607	1.561677559	1.014364906	0.751777332	2.186260582	0.630812128	0	0	0	0	0.271512191	0	0	0.317561302	0	0	0	0	0	0	0	0	0.159997321	0	0	0	0	0	0	0	0	0	0	0	0	0	0	0
TCONS_00603466	NONMMUT057244.2	0.932574798	0	0.610100029	0.388151389	0.673230063	0.795741211	0.904443986	0.036710418	0.243180021	0.113554488	0.503572565	0.402411245	0.260883622	0.243766969	0.240979508	0.042080478	0	0.032601232	0.64826086	0.881386997	0.708638058	0.326724125	2.735087476	0.8577908	0.180387962	0	0	0.299892339	0.13969951	0.471679149	0.402252973	0	0.83079969	2.187290774	0.529457452	0.362848498	0.178713764	0.484604439	0.367249314	0.538798496	0.128444029	0.823446036	0.60804113	0	1.36083379	0.282236307	0.372110491	0
TCONS_00270784	NONMMUT011099.2	0	0	0	0	0	0	0	0	0	0	0	0	0	0	0	0	0	0	0	0	0	0	0	15.64236327	8.107166049	0	0	0	0	26.55280164	9.285496718	0	64.26150937	0	61.52100017	55.49896712	12.79401023	16.44733958	0	10.05713756	6.428454812	0	1.715182116	0	8.598386195	0	1.842247875	0
TCONS_00636731	NONMMUT038762.2	0	0	0	0	0	0	0.105798132	0	0	0	0	0	0	0	0	0	3.381073937	3.001692704	4.978547367	0.650246819	0.538604477	3.774958328	9.196145548	2.219742186	0.946716237	0	0	3.556663158	3.415025315	10.58054419	10.36252627	10.94093934	4.444095464	4.319507044	3.058523776	4.179810969	6.935284537	9.079642187	3.689339761	1.066480946	0	2.02231263	11.24690921	0	11.00295316	8.835248227	9.991750866	22.83995868
TCONS_00636730	NONMMUT064084.2	0	0	0.308118632	0.363722617	0.152556134	0.56556588	0.405625928	0.09040059	1.759115637	0.25366972	0.866872194	0.783534935	0	3.632911371	0	0.600630486	8.330880515	2.324100514	1.3951294	0.548399722	0.667047158	0.885625664	0.61526444	2.820719952	0.426000081	0	0	0.109400725	1.897295645	3.296235884	2.70641297	0	1.028725388	0.480083251	1.16350259	1.631231597	0.458929008	1.692274385	1.868181293	0.308833799	1.7738283	0	2.037273833	3.413381967	3.249050843	4.445609616	4.526612593	0
TCONS_00451096	NONMMUT044096.2	0.103076944	0	0	0	0	0.161572719	0	0	0	0	0	0	0.07243382	0	0	0	0	0.121524119	0	0.12607729	0.277040389	0	0	0.029462731	0	0	1.530592675	0.038536166	0	0.845188202	8.830113255	7.534307387	1.793611868	0.719048572	0.579016143	0.58361889	1.314900883	1.533950856	0.942215009	0	4.091698981	3.269498178	0	1.957004008	1.610274012	0.765461393	0.758064483	0
TCONS_00123268	NONMMUT038240.2	0	0	0	0	0	0	0	0	0	0	0	0	0	0	0	0	0	0	3.557271446	13.00461251	19.17173912	7.190821567	1.592081396	10.61040756	4.110934121	0	5.279725974	9.910422158	1.542303963	0	0	0	1.557698249	1.370957809	0	3.03331958	0	0	0	0	3.909976319	0.674694494	0	0	0	0.825626947	0	0
TCONS_00379665	NONMMUT059503.2	32.00355335	42.93092888	22.82888237	22.54432485	18.2737499	19.01736406	18.04472724	18.62214216	29.98234571	26.37851353	36.34686058	17.74977652	19.93103712	30.11103622	13.82955825	16.86121946	14.10387018	0	0	0	0	0	0	0	0	0	0	0	0	0	0	0	0	0	0	0	0	0	0	0	0	0	0	0	0	0	0	0
TCONS_00378398	NONMMUT011099.2	0	0	0	0	0	0	0	0	0	0	0	0	0	0	0	0	0	0	0.051644782	0	0	0	0	4.49427576	6.830089031	0	0	0	0	55.70251235	0	0	0	0	6.302726127	2.456527266	0	2.968868192	6.374529439	1.126518719	2.179421275	0	0	42.76906112	10.36182905	0	0	0
TCONS_00812917	NONMMUT149856.1	10.4113199	4.112641275	10.03033278	15.80149026	12.38534858	9.268906967	12.78009556	13.73459741	29.21336185	15.0434306	28.83613173	24.02107408	14.62741907	27.4976802	15.14936531	21.29084163	4.273859493	4.299344885	5.622870643	3.251056198	4.888267998	4.097261204	0.394764292	9.26651148	3.95125034	1.123862921	2.990290687	3.301004939	1.861903321	1.158888779	0.122954987	0.719390138	3.926383522	2.610402161	2.003151817	3.1293983	0.592280128	2.503376572	1.082158029	2.334759051	0	0	1.510398582	1.745248364	2.105098079	3.125222576	0.65106944	0
TCONS_00807107	NONMMUT133592.1	0	0	0	0	0	0.040907938	0	0	0	0	0	0	0	0	0	0	0	0.031307201	0.024009661	0.054736884	0.225640753	0	0	0.029784403	0.051290294	0	0	0	0	0.094813691	0	0.367410694	0.133969939	0.110608458	0.014171773	0	0	0	0.105511199	0.516471055	0	0	0.068615514	0	0	0	0.035405375	0
TCONS_00812919	NONMMUT149856.1	0.618571378	0	0	0.769090932	0.344851813	0.528585104	0	0.687316415	1.370708507	1.249923578	0	1.435260067	0.820934285	0.213922927	1.202080334	0	0	0.468188758	1.782813404	0.759538131	1.134866803	1.329049122	0	0.276000147	2.017982404	0	1.497071829	0.523941905	1.938697985	0.888764574	0	0.410397745	0.319793687	1.244506816	0.465344349	0	0.506002159	1.297875017	1.10248652	0.334792429	0.128444029	0	2.045332127	1.460221299	1.618224514	2.49020727	0	0
TCONS_00812918	NONMMUT149856.1	0	0	0	0	0	0.363698841	0	0	2.429465684	0	3.128920155	1.301599172	1.450610434	1.772690808	0.574493413	1.63312709	0	0	0.538776804	0.278975654	0.339383602	0.730000787	0	0.524705867	0	0	0	0	0	0.441566321	0	0	0.282408631	0.23696586	0	0	0	0.231243425	0.673513155	0.214637425	0	0	0	0	0.25263124	1.672685414	0.478574453	0
TCONS_00398402	NONMMUT041742.2	1.297156687	0.586384969	0	0.392798755	0.792878105	0.507994775	0.186814248	0.043129208	0	0	0	0	0	0	0	0.04184345	0	0	0	0.07375339	0.136433018	0.164189114	0	0.302806109	0	0	0	0	0	0	0	0	0.417896896	0.319930712	0	0.026666311	0	0	0	0.404651099	0	0	0	0	0	0	0	0
TCONS_00812753	NONMMUT149857.1	6.04209726	11.35040651	2.522609599	1.474707994	5.102081407	1.600973063	1.965015727	0.359136028	0.210593898	0.153462071	0.397486611	0.316818373	0.17973337	0.167676851	0	0.215411596	0	0	0.308740237	0.060037239	0.274916711	0.051369968	0	0.384743001	0.152297978	0	0	0.034157737	0	0	0	0	0	0.057490873	0	0	0.106667212	0	0	0.009725547	0	0	0	0	0	0	0.098072889	0
TCONS_00669064	NONMMUT022630.2	0.336769217	0	0.605710679	0.81702141	6.900900917	1.914846036	0.447555045	0.145450408	1.392156985	1.001970134	1.425949646	0.710014401	1.218234051	2.95227917	2.482500678	1.277868617	0	0	0	0.416077866	0.640600734	0.05119992	0	0.522716269	0.037373527	0	0	0.059378683	0	0.096672039	0.108293294	0	0.592184343	0.184477892	0.315392815	0	0.092812106	0	0	0.012506545	0	0	0	0	0.183780979	0.126207845	0.988836717	0
TCONS_00716115	NONMMUT009770.2	72.76705607	41.86709212	63.24925881	105.617463	63.74410493	64.46563324	64.87034296	105.3740141	145.4967467	92.43497527	89.81345384	122.1359376	107.9616279	149.8345711	60.95600493	101.4991252	5.354036321	5.978245726	7.733223849	7.103050405	15.70845221	12.03423812	7.389164422	17.0475914	6.244576137	16.44649155	2.09331907	5.868863078	3.419833329	12.69145724	4.363184236	6.172315946	19.43337416	12.92025061	10.24104776	9.450834064	8.256822188	5.390186649	6.932754023	11.58907811	4.900383589	1.209238726	6.656939357	5.154786991	6.200363519	5.420448884	9.766077006	52.00582825
TCONS_00716117	NONMMUT066884.2	0.109714682	0	0.009819575	0.16855732	0	0	0.031462569	0	0	0	0	0	0	0.034823853	0	0	0	0.146100272	0	0.209824724	0	0	0	0.089353208	0.205161174	0	0	0	0	0	0	0.367410694	0.074427744	0	0.203421634	0	0	0	0	0.554403867	0	0	0	0	0	0	0	0
TCONS_00520100	NONMMUT023400.2	25.89112898	9.49903917	9.598703527	0	10.84983284	7.720677872	2.075354957	0	0	1.223921169	0	0.218509306	0	0	0	0.977031911	0	1.490828048	5.334178473	0.773559896	1.08410427	2.952204063	0	3.5745751	6.923933171	19.27680286	5.466209763	6.593612893	0	7.379804656	30.4321576	13.62763003	2.444564358	3.286211334	7.26022782	7.122571756	6.245471305	12.65903639	15.69461503	2.927731388	15.30409981	22.78301891	12.26592332	9.609218224	15.09724507	11.78084801	8.5955045	0
TCONS_00667727	NONMMUT074149.2	0	0	0	0.087083935	0	0	0	0	0	0	0	0	0	0.118018037	0	0	6.134387115	11.25593021	15.87720499	2.856343963	2.082199595	6.958922414	8.375749547	7.172387991	2.923153504	3.2179555	2.609617166	3.684867133	2.209015202	26.78033554	28.62097887	2.419583122	15.0855882	17.00653546	15.94066573	17.36763524	20.1768318	28.84319524	9.938240532	10.20157465	3.130432373	0	14.75333002	9.066191455	51.14157356	23.52490633	33.10887612	40.45274593
TCONS_00520101	NONMMUT023400.2	7.924801206	6.034533737	6.392838064	6.285008836	4.686728985	6.502003125	6.019764805	5.563509708	7.86035646	6.032824798	9.575544224	5.063017561	4.038145705	6.662029372	3.78903436	5.336920274	0	0.556172429	1.315441334	0.616483284	0.584104271	0.552918939	0.274941412	1.390615895	0.472640055	0	0	1.391440473	0	0.088271546	1.123143721	0	0.144106997	1.219211512	0.63836753	0.24391675	0.300467646	0.770460342	0.386206159	0.470227031	0.751904092	0	1.028306869	1.24697791	1.824504871	0.419301915	0.169733368	2.936584399
TCONS_00164733	NONMMUT016178.2	68.70421167	42.05019257	40.78085305	26.53576219	60.0356402	35.91884683	30.19361026	13.09053668	13.42353717	12.92144259	14.32384184	12.41533257	9.140332034	10.53423285	7.151370292	4.851201256	0	0.761808562	0.768309168	0.684211055	2.02415683	0.618356518	0.781453565	1.459435736	0.649677051	1.424414348	2.697079604	0.239913871	0	0.455105716	0.048388424	1.102232081	1.570425393	1.35282653	0.283435467	0.133331557	0.136840554	0.588563304	0.281363198	0.59592814	0.125067214	1.77085169	0.308615507	0.247957429	0.486765395	0.152926244	0.283243	0
TCONS_00741856	NONMMUT065109.2	6.528023587	2.648831028	10.0210631	13.73925164	5.078464093	9.926992967	13.28769168	24.0306207	34.47830658	18.47904544	21.37385775	33.01856699	26.44054315	19.82608992	31.96288699	26.24695175	0	0	0.072028984	0.182460843	0.498155054	0.015458913	0	0.552006251	0	0	0	0	0	0	0	0	0.148855487	0.119116801	0.354294333	0	0	0	0	0	0	0.252978813	0.308649798	0	0	0	0	0
TCONS_00363300	NONMMUT105083.1	0.96636692	1.19859604	0.255063467	0.245780652	0.258814526	0.27199688	0	0	0	0	0.062946571	0.026559142	0.15249783	0.151327052	0	0.018472429	0	0.39653701	0.064970144	0.454744913	0.434059807	0.608601944	1.634670615	0.065358893	0.318564013	0	0	0.840358311	2.748981856	2.069839757	2.167365921	6.194544293	0.341511702	0.683117839	0.65195826	2.654177966	1.783100839	2.498358296	1.562831882	0.365168873	2.364020484	4.45596881	2.049824197	0.123978714	2.424632518	1.283925054	3.726557336	13.7454419
TCONS_00107187	NONMMUT120536.1	7.856723246	3.209720998	1.384294979	0.771462775	0.816495419	1.518693564	0.86441311	0	4.926292233	0.648943561	3.545990144	0	2.330519732	0.508323777	0	0	0	29.14257953	41.21750592	3.211257922	7.303500072	11.38103721	45.04702097	30.68721569	27.41035349	7.902040339	15.80681297	21.61042186	12.2438741	10.56019717	17.07404914	11.97667008	0	2.400662999	7.827594765	5.596458759	2.302821263	8.645034652	6.670382841	7.901331755	4.30543885	11.37215658	3.057282375	3.662207247	16.92943002	10.65227417	2.854098086	33.69201066
TCONS_00830269	NONMMUT139470.1	0	0	0	0	0	0	0	0	0	0	0	0	0	0	0	0	0	0.156024655	0.274022267	0.072754442	0.070612283	0.854414118	0	1.22252464	0.976088479	0	0	0.103822728	0	0	0	0	0.342709989	0.066314025	0	0	0	0	0	0	0	0	0	0	0	0	0	0
TCONS_00241521	NONMMUT075201.1	2.494143869	5.292695497	5.122057374	0	4.353510162	3.81511521	1.806612179	0	0	0	0	0	0	0	0	0	0	3.089613761	10.07577449	0.871333656	0	4.454918614	8.92953964	0.627599065	9.54449104	26.3937874	17.7400411	9.277109518	15.68748039	8.188565438	20.69335812	18.66391212	2.011097178	2.620356922	7.05540318	7.022679754	8.890667634	12.13493625	14.50722716	3.581456612	14.7235378	36.7292349	10.36934387	0	12.69235359	9.106408305	6.295111073	0
TCONS_00226696	NONMMUT120536.1	0	0	0	0	0	0	0	0	0	0	0.074640645	0	0	0.02178232	0	0	0	0	0	0.010705622	0	0	0	0	2.430664106	0	0	14.60874546	0	0	0	0	0	0	0	0	0.658237275	0	0	0	15.72820273	0	0	0	0	0	0	0
TCONS_00812920	NONMMUT149857.1	125.1658557	72.72514584	64.22306609	56.46322275	75.31939918	62.09480006	66.43084443	28.39520799	44.41245363	30.62568005	52.33875857	36.20870225	29.14767106	34.15777684	32.46927985	38.37499439	7.056619871	3.537024973	7.067459946	4.448804142	5.652539775	8.17643548	18.13688602	20.79629803	7.175238513	0	0.707598099	3.91983278	0.776627775	0	0.912557297	0	0.667401021	5.476454503	4.194759875	0.82174905	1.366660823	1.517223267	1.034044922	5.838983376	0.162587379	8.318955283	1.717959656	0.312798297	2.576070641	0.638226757	0	0
TCONS_00785081	NONMMUT011099.2	0	0	0	0	0	0	0	0	0	0	0	0	0	0	0	0	0	0	0	0.666033848	1.037655458	1.708704565	0	4.670974708	3.755167548	0	0	0	0	43.96067111	8.386294625	0	11.85598232	5.075286132	34.15859372	10.75201673	0	8.880645836	3.986353786	7.956721289	0	9.301524992	0.42870123	0	15.03845463	1.912757771	3.302436349	0
TCONS_00033702	NONMMUT106537.1	2.260067595	3.165021974	2.924740844	0.834286496	4.867352637	2.417659139	1.775999099	0.129008188	0.198094445	0.261512982	0.618219252	0.849409656	0.452141758	0.316061287	0	0.140178717	6.44759824	5.803541108	7.236848108	4.41644552	4.75579033	3.087562305	2.506251824	5.827419671	5.865233126	4.421992599	0.298605242	2.009818475	0.188580983	1.965848101	3.809427106	2.206852331	5.309905965	2.212084085	2.916423405	9.783202969	6.306707453	4.212099753	3.903281302	4.825079184	0.179971721	0.834577104	1.427312429	0.633779188	5.614460238	2.168821844	3.723441663	28.46963862
TCONS_00694664	NONMMUT075201.1	0	0	0	0	0	0	0	0	0	0	0	0	0	0	0	0	0	0	0	0	0	0	0	6.693478622	0	0	0	0	0	0	0	0	0	0	0	0	0	0	0	0	0	0	0	0	0	0	0	0
TCONS_00361190	NONMMUT011559.2	0.673703006	0	0	0	0.402548325	0	0	0.188263419	0	0	0.07855732	0	0	0	0	0	0	0.150441537	0	0	0.048453033	0.133379501	1.013284789	0	0	0	0	0	0	0.142296387	1.647916184	3.072104514	0.186657339	0.139894175	0	0.947054047	1.288730127	0.722074243	0.688355063	0	0.775291661	0	0.677856816	1.178665639	1.918829188	0.169245659	0.674012123	0
TCONS_00503459	NONMMUT084308.1	48.26233667	97.4581089	41.44296737	37.02420532	41.71231347	49.57247114	37.92089064	20.94090623	23.01538402	24.84929005	42.81401922	29.57312191	17.24038831	29.0982367	23.03575561	23.79116158	22.97952389	14.02525043	21.1424037	20.90715897	17.14339466	21.3622544	16.53490622	13.01985852	13.20244639	28.86799513	21.82264902	12.25588014	26.44514402	16.98725698	32.421938	20.66666781	18.59299562	20.44651808	22.02404115	27.8942683	22.80420464	22.24698043	17.36250089	10.9082024	16.43083034	12.9229167	19.66799768	15.59962175	23.28588297	22.74694867	18.73351497	15.6031243
TCONS_00668442	NONMMUT149630.1	8.256139546	1.158863575	3.203734615	6.629106565	2.732581722	3.091426514	3.594692905	5.738081817	7.603217906	3.317487329	3.546102049	4.162481556	3.938264396	8.407052629	1.300249144	2.190728983	0	1.188807478	2.038780405	3.726769899	3.558394493	3.443287351	2.489580815	0.389508506	0.632580287	0.209388909	0	0.094196184	0.562404052	6.995316177	6.094134957	9.528796337	14.12832833	8.625179522	7.897277375	14.75449672	11.26543282	9.156279325	5.705131221	8.143930128	3.197843601	1.264894064	2.955816454	2.627852832	7.913290944	2.116914307	5.00263786	15.03871649
TCONS_00820476	NONMMUT072112.2	64.841816	32.44073025	27.75795563	77.7932125	28.62070962	16.46502235	20.66597875	11.86910107	14.43297744	13.5308242	16.87645117	10.27683874	11.04758816	10.54800568	8.960450268	17.540259	7.862402337	0.59139303	0	1.766395752	2.116058981	0	6.051836889	4.253885845	0.125986058	1.195897589	0	0	0	0	0	0	0.530253018	1.390637606	0.027875878	0	0	0	0	1.665205975	0	0	0	0	0	0	0	0
[truncated: 41 more rows]
[truncated: 74 more columns]
